# Supplementary material for: Utilization and transformation of Chrysotila dentata-derived dissolved organic matter by phycosphere bacteria Marinobacter hydrocarbonoclasticus and Bacillus firmus
Source: PeerJ. 2024 Jan 4;12:e16552. doi: 10.7717/peerj.16552 (PMC10771764; doi:10.7717/peerj.16552)
Supplement: Supplemental Information 1 [file peerj-12-16552-s001.xlsx]

## Sheet: Sheet1
36.36	63.61	183.5	122
6.83	35.24	184.4	261.5	310.9
91.37	28.13	54.47	295.8	273.8
59.62	62.83	142.9	381.1	245.1
54.6	114	150.3	256.1	536.6	327.8
155.5	121.2	177.2	158.2	726.6	353.2
122.7	37.7	143	108.6	679.6	533.2
51.6	133.4	142.8	140.8	341.9	719.7	263.5
71.47	73.86	112.9	129.9	335.9	703.5	354.2
138.4	141	154.2	52.69	150.8	618.3	534.8	440
105.8	103.3	231.2	109.7	98.35	400.6	692.3	272.9
204.1	30.72	92.36	160.7	124.3	218.7	803	349.2
181.6	147.4	154.1	114	176.5	144.7	716.7	651.2	243.6
108.4	49.98	130.5	143.6	76.72	104	527.3	834.5	265.6
105.3	117.8	124	107.4	156.9	102.9	314	933	439.7	466.1
181.7	131.5	166.1	168.6	112.7	112.2	160.4	711.7	748.3	240.6
212.7	57.69	204.4	203.9	138.1	95.41	101.5	410	943.5	284.6
181.6	116.7	160.6	112.5	115.8	140.8	64.09	247.6	998.3	553.5	265
114.7	167	155	110	153.7	96.87	75.94	133.3	775.1	899.8	189.7
189.6	69.66	82.16	155.5	170.7	149.6	48.22	89.49	430.7	1141	328.2	522
165.7	117.9	106	183.2	195	88.19	92.66	76.34	255.6	1119	570.3	209.9
228.4	108.6	78.55	125.2	166	79.93	53.27	72.89	115.3	809	998	219.3	1099
220.3	181.5	180.7	298.9	245.2	235.2	115.2	60.08	103.3	450.3	1245	305.5	290.4
175.5	135.4	215.3	328.3	231.4	256.9	117	78.9	62.13	216.5	1235	684	190.4
155.2	315.4	241	306	304.3	313.3	108	93.59	59.24	125.6	906	1005	219.4	594.7
149.1	227.5	145.8	317.8	325.7	331	133.7	68.55	54.65	77.79	488.5	1375	319.8	237.4
156.2	283.8	182.1	402.2	397.5	341.2	138.2	91	57.85	71.73	263	1393	766.9	240.6	1265
177.8	147.4	262.8	346.9	567.2	318.8	209.4	125.3	56.6	87.33	150.3	1017	1245	250.7	398.4
221.9	262.3	204.2	506.5	535.2	453.4	261.7	150.4	72.59	88	109.2	575.2	1625	436	273.7
281.8	306.7	208.5	393.3	624.3	514.5	317	115	71.24	92.13	120.2	324.6	1556	828.7	290.4
148.9	298.1	304.6	478.6	786.5	650.1	314.7	176	108.5	98.91	116.9	216.9	1146	1347	347.5	339.4
262.8	188.7	383.7	575.3	569.4	583	350.2	158.9	110.6	121.3	127.6	180.4	688.8	1772	554.1	313.9	1328
181.7	212	370.3	569.4	765	761.8	407.6	181.9	135.9	135	134.4	166.8	429.8	1791	956.8	362	466.6
327.2	273.5	342.5	663.1	959.3	892.5	474.4	221.6	143.5	121.5	149.4	190.7	291.5	1388	1562	426.9	338.6	2695
269.6	218.2	235.1	509.5	928.8	795.6	510.6	268.4	113.5	150.8	162.3	211.7	277.6	854.5	1917	600	338.3	640.5
271.3	129.8	303.4	390.9	938.8	726.2	471.1	306.1	189.5	128.6	177.6	200.2	256.5	555	1945	1058	347.2	303.3
213.6	234.5	317.3	526.6	954.1	904.9	470.9	292.7	182.2	157.5	219.1	215.2	279.4	408.5	1543	1573	397	258.3	931.3
215.6	137.3	200.2	560	725.9	843.2	489	325.9	203.3	199.3	200	240.2	290.8	338.8	1045	2000	574.5	258.5	287.9
162.7	178.2	204.4	601.3	792.6	706.9	474.3	297.5	189.5	206.6	216.3	265.6	320.9	415.8	725.6	1906	960.2	268.9	196.8
268.2	102	287.6	597.3	866	720.2	523.6	339.2	234.7	218.1	253.8	305.1	345.9	423.4	565.3	1591	1455	329.6	189.3	391.8
291.6	185.5	359	632.3	650.1	743.1	601.3	425	258	239.9	257.7	364.1	383.1	468.9	527.7	1108	1819	495.4	200.3	219.3	2972
192.9	126.7	265.5	612.6	921.9	881.5	621.5	402.6	275	308.5	298.6	366.6	460.5	480.8	573.5	807.7	1885	844	231.9	204.2	607.3
212.1	167.1	567	564.5	854.2	785.3	622.8	325.4	305.7	338.3	359.6	459.7	520.8	605.5	621.9	692.7	1580	1293	276.7	202.8	185.3
298.3	172	261.7	715.7	802	768.8	679.6	385.4	318.2	326	374.7	493.8	576.4	623.5	667.6	694.4	1136	1694	425.1	204.3	125	1124
298.5	260	306	717.5	1037	912.6	631.4	395	326	369.5	433.2	497.4	652	745.6	759	721.8	844.8	1734	666.2	228.8	121.1	239.6
126.2	159	195.4	846.6	1247	1075	685.4	418.2	384.7	366.8	466.6	559.9	711.6	737.8	828.8	833.7	723.6	1447	1073	269.8	127.8	116.3	2248
216	132.3	246	883.4	1312	1132	677.8	434.3	351.9	423.8	497.5	679.1	740.5	870.9	898.8	865.6	698.7	1068	1399	401	132.5	105.2	459.1
274	215.2	399.6	667.5	1397	1137	730.6	474.1	373.6	422.3	523	699.4	789.3	899.1	940.7	914.3	702.2	784.2	1488	591.6	141.1	94.12	140.4
257.2	223.4	318.8	1017	1686	1124	798.3	500.8	403.6	437.2	541.8	672.7	781.2	914.1	960.7	923.9	736	663.7	1266	922	164.3	102.1	86.01
252.6	165.4	288.8	974.8	1584	1216	830	540.6	406.7	410.4	575.9	724.4	842.5	968.7	959.2	904	765.4	587.9	915.2	1230	253.4	98.6	80.81	192.1
183.6	221.5	407.9	780.2	1391	1266	797.1	531.7	433.3	445.2	618.9	772.9	854.1	985.2	1029	925.1	775.3	634	640.6	1245	420.8	108.2	80.82	87.65
231.7	139.5	193.4	847.5	1291	1261	715	512.1	437.5	491.9	598.8	719.8	846.6	1017	1040	938.5	766	611.2	524.2	1038	708.9	120.3	78.22	75.53	339.1
98.77	130.4	277.8	839.7	1661	1107	719.7	533.5	398.1	440.4	616.6	712.9	850.8	1002	1077	972.8	771.9	623.7	470	769.4	935.5	191.2	88.4	71.01	114.4
247.1	273.8	157.6	737.7	1559	1230	776.8	523.3	448.2	468.5	621.7	697.2	877.2	971	994.9	941.7	790	646	461	550.1	1015	351.9	92.77	73.33	74.4
209.5	144.6	255.4	969.6	1449	1117	695.6	576.6	519.5	485	565.1	718	830	968	1049	977.4	785.5	649.9	474.3	409.9	888.5	574	116.2	90.46	70.87
262.7	117.3	305.9	713.9	1378	1104	836.5	473.4	457.8	455.8	575.5	687.4	779.8	944	1031	944.8	787.6	623.2	465.5	358.2	636.7	789.7	181.1	93.54	86.77	85.71
369.4	89.89	329.1	722.3	1511	1043	734.7	560.9	491.1	423.2	570.1	697.5	790.5	916	940.5	891.2	719.1	603.8	461	346.5	414.9	904.4	314.4	106.9	96.26	80.5	265.5
241.8	134.8	199.8	820	1233	1072	759.2	470.6	490.6	450.8	553.3	643.8	767.1	881.4	912.6	920.6	756.8	587.6	462	348.3	287.9	819.8	507.4	131.6	101.6	89.09	107.7	2046
177.7	193.1	257	657.4	1315	923.9	683.2	445.9	438.1	413.9	452.2	592.9	752.9	882.7	834	817.8	730.5	581.5	468.1	344.3	257.5	583	707.1	191.2	104.3	100.3	85.67	433.5
177.3	213.9	180.8	654.4	1318	1095	675.6	493.6	496.6	419	485.2	614.2	737.1	801.2	850	820.4	731.2	586.5	462.9	360.1	245.6	399.4	826.9	296	116.7	109.6	83.21	127.3	3523
72.86	216.8	247.2	640.9	1059	879.7	710.6	514.7	421.4	422.5	446.9	609.5	697.9	801.5	847.5	791.3	741	563.5	455.9	348.6	234.9	290.6	740.6	473.6	150	116.5	87.04	80.58	836.2
164.6	135.8	250.6	554.8	949.8	808.9	672.7	466.1	411.3	423.4	418.3	607	690.5	772.9	783.7	784.1	686.7	568.8	458	363.9	253.5	230.4	571.6	666.6	194.2	120	100.8	79.86	174.7
244.6	99.59	166.3	529.6	999.8	906.4	663	473.9	459.5	389.3	414.6	544	675.8	739	757.5	741	670.3	562.1	445.6	364.2	256.1	234.6	396.6	786.2	276.9	133.4	99.8	77.81	73.87
225.6	126.8	91.16	449.1	933.7	983.5	619.1	472.5	382.7	365.5	462.4	501.7	602.2	676.2	726.1	722	670.9	571.1	438.2	362.9	261.9	243.7	294.3	724.6	430.7	153.4	113.1	80.84	52.64	326.7
63.57	237.2	97.02	468.4	671	894.2	553.2	447.6	436	363.8	428.2	462.2	534.6	660.2	708.4	676.5	634.3	551.7	464.9	348	280.5	242.5	246.9	571.5	586.4	183.1	115.2	85.77	56.99	91.27
74.58	92.16	239	622.3	625.5	797.1	637.2	450	388.7	384.1	403.3	495.9	545.4	630.3	677	665.5	597.6	509.6	437.2	362.7	284.6	244.5	236.1	422.5	722.5	267.4	128.6	85.35	58.65	55.13	733.7
110.1	58.92	178.4	392	754.3	694.9	554	417.2	408.4	396.7	376.3	466.4	531.9	547.1	645.8	669.4	601.4	502.9	412.5	361.5	279.1	243.8	241.7	319.9	691.3	373.9	138.6	90.99	60.27	51.66	148.5
62.07	135.5	183.9	367.1	670.9	693.5	516.3	477.7	386.9	387.6	378.7	407.5	519.2	552.5	621.4	640.3	560.9	508.1	409	358.6	282.8	255.8	244.2	264.8	571.8	540.7	174.6	101.4	63.07	49.26	57.31	1557
142.4	219.7	127	321.3	757.7	699.6	486.7	476.7	375.7	366.9	373.1	421.3	489	566.5	588.5	583.2	565.7	477.3	413.1	351.2	300	259.9	252.5	250.1	420.8	634.2	233.4	100	72.5	46.31	42.98	314.7
33.72	188.6	251	363.8	514.9	710.1	609.1	377.9	370.2	368.2	356.8	407.8	501.1	551.3	570.8	597.6	537.9	463.2	405.5	349.7	292.9	270	247	246.7	321.3	642.2	339.4	113.5	73.93	54.17	42.22	79.6	3047
215	40.2	156.8	524.2	540.6	567.5	478.3	413.2	367.5	330.4	384.4	365	475	501.3	548.9	539.9	528.4	440.1	406.1	344.7	289.9	276.3	256	252.5	260.3	537.9	456.5	135.7	84.54	57.68	43.18	41.45	698.8
188.2	136.6	138.6	436.6	637.5	619.4	486.2	445.5	364.3	315.9	370.5	374	462	491.7	530.8	546.5	522.9	437.1	412.5	342.8	269.8	277.2	272.7	245.4	246.2	422.4	553.8	192	81.27	55.05	45.72	39.3	142.6
118.3	72.09	100.4	380.4	546.4	529.2	558.2	385	332.4	319.7	345.5	372.6	440.1	476.7	508.4	525.5	489	426.4	387.1	340.1	284.7	282.1	253.6	248.9	234.1	301.9	568.1	279.4	94.39	61.66	48.5	38.37	55.88	1516
222.8	145.4	120.1	361	518.3	517.2	531.8	401.6	344.5	346.9	336.3	367.4	405.1	458	499.8	494.2	451.6	434.3	381	333.4	298.3	266.1	259.5	249.1	239.8	246.8	498.3	384.4	116.1	66.62	51.9	41.92	39.02	295.3
170	140.7	254.7	356	466.3	536.1	460.5	381	344.8	338.3	334.2	328.9	410.4	446.1	515	465.1	464.9	388.4	356.2	317.8	293.1	261	268.2	260.1	237.1	212.9	367.3	474.5	160.7	72.01	51.06	43.05	36.03	75.87	3089
166.8	123	210.7	402.6	557.8	525	451.9	429.8	352.9	297.5	365.9	326.7	390.8	426.6	456.7	451.7	426.5	397.5	343.9	318.6	298	265.3	265	245.3	232.8	217.1	287	505.1	237.4	74.84	55.03	43.17	38.84	43.3	699.9
148.3	42.36	168.9	328.4	420.2	465.5	397.5	369.7	335.8	317.6	327	324.2	366.6	430.4	417.7	425.8	403.3	389.9	352	326.7	293.5	258.4	253.8	253.9	240.5	212.8	222.9	435.9	321	101.4	59.7	52.58	38.71	35.9	132.8
148.7	171	150.2	163.5	417.5	483.6	398	371.8	266.1	314.6	318.6	352.8	350.6	389.4	390.7	404.2	411.4	377.6	366.6	303	290.4	256.8	264.4	254	231.7	214.4	193.8	347.4	399.8	129.6	64.24	55.05	44.54	35.84	47.93	1357
162.1	80.3	140.9	355.2	301.6	423.8	431.3	407.6	344.8	326.6	332.9	338.4	363.3	382.6	392.6	417.6	397.4	354.7	330.7	298.3	276.8	259.9	270.6	247.7	233.4	214.7	190.5	249.6	442	189	69.16	53	46.1	39.88	34.7	259.7
351.1	187.1	219	246.6	406.9	413.2	318.2	331.4	314.5	285.6	333.9	331.9	361.4	376.8	361.4	369.5	363.5	330.4	338.7	303.4	264.2	271.7	257.7	238.3	222.8	208.6	185.4	191.6	393.9	278.6	85.54	59.57	46.09	38.39	37.52	67.77
555.2	35.76	127.8	420.1	389.5	428.9	360.3	369.6	284.8	316.6	288.9	314.7	321.5	376.7	359.5	360.2	376	360.2	317.1	302.7	251.3	242.4	258.5	233.6	226.7	203.9	189.7	167.8	319.1	352.4	114.4	69.42	56.12	45.02	35.24	36.85
	127.2	106.4	191.5	389.5	374.2	417.6	347.4	287.4	288.7	294.8	333.3	313.8	321.3	359.2	372	337.3	340.8	317.3	293.9	264.9	244.9	241.7	238.3	225	207.4	175	147.8	240	396.4	160.5	74.76	59.53	45.2	37.97	31.8
	99.52	163.8	191.7	335.9	413	360.4	335.4	309.2	305.4	289.1	303.1	321.8	342.8	358.1	368.2	334.8	326.6	303.5	288.2	250.4	237.3	249.1	236.5	222.6	198.8	179.1	151.8	173.5	357.7	238.3	78.42	58.56	42.3	38.6	33.26
	126.2	69.7	130	478.5	463.7	329.8	352.4	285.3	317.9	270.1	293.7	299.8	316.9	333	349	329.7	327.6	319.9	277.8	255.9	243	240.6	215.1	214.6	201.4	174.8	158.4	147.3	287.6	307.2	96.09	60.61	54.75	43.26	32.68
	326.1	133.5	234	409.6	372.1	328.8	258.2	264.4	256.7	286.7	302.7	310.2	325.4	305.1	331.1	320.9	319	291.2	275.2	238.7	241.3	228.9	227.7	213.6	202	172.9	148.2	135.6	224	351.4	140	68.28	56.8	44.01	35.38	27.53	57.24
	890.3	107.4	228.1	455.6	489.4	406.4	282.3	290.2	280.2	306.2	296.3	307.1	332.1	304.6	325.7	314.7	317.1	296.1	276	238.1	243	234.2	222.2	203.9	200.8	174.5	170.3	144.2	172	359	197.9	81.25	64.38	43.79	35.13	29.04	29.64	492.5
		237.3	197.4	210.8	410.1	315.5	291.6	258.6	285.9	276.2	295.3	286.7	337.6	289.7	330.8	312.5	297.3	276.5	256.6	247.3	231.9	226	215.6	212.6	199.3	186.9	156.7	140.8	135	288.2	283.9	98.49	60.32	46.78	38.49	29.23	25.71	94.79
		220.7	275.9	286.8	353.9	379.4	299.1	261	251.6	279.5	292.8	283.8	299	278.7	318.8	324.7	323.3	297.3	255.2	231.6	237.7	234.6	209.1	210.2	188.6	174.8	151.6	139.5	135.8	210.2	313	131.6	68.95	46.87	39.44	30.96	23.97	34.63	1001
		195.5	342.5	223.8	363.3	413.8	294.1	261.5	272.9	250.9	286.1	292	295.3	280.3	308.6	319.8	271.6	272.9	265.9	246.7	221.2	208.5	200	208.1	181.7	179.9	164.2	142.9	128.5	165.3	320	195.2	75.72	54.82	43.02	32.97	27.34	22.68	189.9
		547.3	189.1	312.7	351.9	256.6	287	294.6	285.4	240	250.4	270.3	244.6	264.8	266.1	307.7	290.8	279	245.4	202.4	202.6	193.7	207.5	198.9	184.5	173.5	164.8	142.5	132.6	141.2	275.4	249	86.06	62.33	48.73	36.84	27.44	22.06	47.49
		1113	195.2	291.2	332.8	288.8	261.6	275.2	270.5	264.7	265.7	274	257.5	301.9	272.3	288.3	269.7	258.5	233.3	210.9	207.6	207.5	207.4	189.3	173.5	170.5	159.2	143.6	128.5	118.1	210.8	288.1	113.9	70.52	48.3	37.36	28.97	22.95	26.85	426.6
		1827	250.3	249.6	249	349.8	281.5	257.9	266.4	281.2	275.7	257.7	263.5	264.7	271.7	277	262.6	235.9	232.3	213.5	209.9	197	200.1	191.8	180.7	171.2	154.2	141.7	131.8	126.8	160.4	303.2	171.5	73.57	54.16	42.64	30.43	23.39	20.45	82.13
			215.6	305.2	289	271.2	293.2	268.8	260.9	243	266.9	268.8	254.5	264.6	285	292.4	260.2	226.9	228.7	211.5	211.2	184.9	196.1	192.2	176.9	165.8	159.7	146	131.2	119.2	133.9	280.3	222.7	79.31	56.03	52.72	34.69	22.45	17.78	26.36	967.9
			294.3	280.2	270.3	300.3	291.1	261.5	259.4	219.9	218.2	263.4	234.2	259.5	272	261.8	258.8	241.2	218.3	189.7	200.5	185.5	186.3	183.4	176	167.7	152.1	142.7	129.6	120.8	130.7	228.7	256.9	104.4	56.34	46.23	34.46	25.48	18.27	18.92	181.9
			539.6	265.3	266.3	334	267.6	271.5	253.5	244.4	257.9	247	237.7	265.5	258.1	245.8	282.3	234.5	222.7	209.1	193.3	187.6	183	176.5	164.7	165.4	147.3	135.4	129.8	113.6	126.4	172.4	270.3	137.2	58.57	43.38	33.32	29.78	21	19.15	42.2
				305.9	408.6	286.7	311.5	239.5	248.1	259	231	252.8	246	263.3	265.6	224.3	236.7	224.9	200.3	206.1	191.5	188	174.6	176	172	158.5	156.1	137.2	132.7	123.9	120.6	126.1	265.3	180.5	67.27	48.69	32.97	26.25	20.29	15.04	19.76	392.5
				297	314.4	363.6	288.7	253.3	247.8	252.2	248.2	250.5	257.4	238.1	267.5	252.7	223.4	221.5	201.5	182.2	176.4	180.2	183.2	176.3	165.7	150.8	150.1	140.8	129.6	119	112.3	113.8	211.8	224.2	85.94	49.1	37.38	27.26	21.63	17.84	15.4	73.28
				256.8	347	278.1	251.4	300.3	245.2	221.5	242.2	240.7	238.2	264.5	260.9	260.9	217.8	215.9	207.8	189.2	179.5	162.1	165.2	159.1	156.5	149.3	139	139.2	136	122.1	113.9	109.8	166.9	241.4	115.7	56.07	32.85	27.83	22.1	16.14	14.65	21.76	832
				344.4	403.8	294.9	234.8	258.5	217.2	251.7	240.2	227	238.3	254.3	217.7	227.2	214.1	213.8	199.3	191.1	174.1	174.1	180.3	163.5	150.3	151.2	150.3	140.3	131.9	121.3	113.4	102	128.6	240.2	155.4	60.14	39.17	27.3	22.33	17.84	12.96	14.99	153.7
				819.8	313.9	298.5	261.5	289.1	251.2	241.9	236.7	240.4	246.3	234.6	227.1	224.1	214.5	217.4	208.1	170.7	183.8	152.7	162.6	163.5	149.5	143	151.2	137	127.3	117.5	113.4	102.7	110	195.5	181.6	67.53	41.21	31.34	23.22	18.05	12.76	14	36.22	1503
					263.4	304.2	250.2	226.9	239.4	254.1	207.8	213.5	229	241	203.9	233.8	210.1	198.6	203.9	165.4	161.8	154.8	153.1	151.7	146.2	145.2	138.2	134.3	122.8	119.5	116.1	108.6	97.82	157.2	203.5	93.15	42.08	30.93	23.98	19.48	13.16	11.78	14.8	334.9	6320
					245.7	302.4	248.8	194.1	227.5	230.4	220.1	255.8	214.2	211	245.2	216.6	211.9	192.5	188.1	160.9	157.9	156.6	157.7	145.9	152.2	141.4	136.1	125.6	128.7	122.9	108.7	106.9	96.39	126.1	214	123.9	43.89	30.32	24.95	17.8	15.56	12.4	11.87	61	2587
					410	278.7	239.9	216.1	256.1	214.8	216.8	222.3	219.7	220.1	193.9	217.5	206.9	203.7	174.2	157	154.6	148.7	157.4	139.5	136.4	140.4	132.3	121.2	125.4	123.9	108.9	101.6	103.6	102.7	185.3	152.3	56.32	31.01	24.55	19.71	16.34	13.54	10.53	18.22	709.9
					451.4	260.2	242.8	223.5	227	241.2	215.7	232.8	207.4	209.2	208.8	214.6	204.3	187.3	170.4	147.8	154.4	143.8	138.1	146.1	128.4	136.9	128.9	132.7	116.6	116.3	111.3	95.8	99.49	97.07	145.2	168	69.17	32.62	26.52	19.61	14.76	12.09	10.79	12.78	131.6
						266.4	217.3	217.7	236.9	230.8	204.5	211	214.6	216.8	212.7	204.9	180.7	180.7	171.1	145.4	146.1	132.9	140.2	135	128.8	130.6	120.4	122.8	118.2	119.5	111.7	105.7	101.3	85.33	113.9	181.8	95.17	38.4	27.88	19.65	14.48	13.05	10.44	9.934	28.54	1370
						205.8	235.1	179.6	222.3	228	228.6	213.2	209.6	219.4	209.6	206.9	186.4	168	163.4	145.4	136	139	128.8	135.5	122.7	125.6	118.9	116.2	109.9	110.9	108.7	106.7	92.73	86.16	93.96	167.9	120.4	43.6	27.52	19.66	15.68	14.4	9.345	8.59	12.26	300.6
						193.7	204.5	239.8	231.3	190.6	218.1	220.3	211.5	189.1	206.1	201.3	185	181.5	149.4	148.6	129.9	137.7	125.4	121.5	124.2	120.7	126.5	112	109.3	104.9	104.7	101.4	95.44	82.55	75.26	132.1	141	53.38	29	22.22	17.61	13.04	10.42	7.017	8.052	54.98
						252.5	241.5	210.3	220.8	194.4	208.6	219.3	193.3	199.3	200.6	187.7	180.4	154.7	147.7	132.1	121.9	140.4	121.9	110.1	121.2	116.4	113.2	110.2	111	106.5	106.3	103.3	87.65	81.81	78.04	106.1	155.5	72	30.92	20.38	18.11	13.5	10.76	7.862	7.616	16.35	666.3
							259.7	183.6	202.1	188.1	195.5	211.9	190.3	204.7	204.5	189.1	161.7	157.5	155.7	135.2	130.8	124.8	116.6	114.9	115.4	102.3	107.6	105.7	111.2	108.7	104.5	102.6	89.23	82.64	69.65	80.92	135	96.98	33.2	23.29	16.81	12.24	10.18	7.842	7.374	8.772	121.8
							284	217	208	209.6	200.6	202.4	192.9	189.7	173.5	192.9	163.3	167.5	149	135	120.8	117.2	105.1	110.2	109.9	101.6	110.9	107	109.1	108.4	99.39	101	91.38	83.7	72.1	74	124.8	110.7	41.91	20.77	16.58	12.75	11.83	8.174	7.122	5.992	25.67	1314
							243	164	183.9	192.5	194.2	190.2	198.8	180.7	181.8	175.7	160.7	153.1	137.2	123.4	118.7	111.1	109.9	105.5	100.9	103.1	99.34	105.6	103.2	95.87	100.5	92.06	87.93	79.49	65.56	69.09	98.19	123.6	51.88	24.51	15.14	13.35	9.529	8.04	7.527	6.48	9.383	287.1
							185.7	204.8	205.8	190.7	194.3	192	205	180.5	165.6	154.9	141.6	156.5	122.1	119.2	118.3	109.5	107.9	99.78	100.3	95.51	97.28	102.4	98.86	100.2	98.75	90.59	86.19	81.92	68.25	61.39	71.35	115.1	72.45	27.21	17.57	13.59	9.778	7.65	6.245	5.791	7.366	50.46
							268.2	171.9	204.7	198.6	163.2	203.9	189.6	177.4	183.6	161.1	147.9	141.4	132.3	119	114.3	115.7	100.1	94.07	92.31	91.92	99.26	97.71	96.63	93.91	95.9	82.38	85.45	77	67.04	59.04	51.79	107.1	93.41	30.01	17.38	14.64	9.485	8.47	6.179	6.319	6.29	13.84	629.9
							538.1	178.2	200.5	176.1	165.9	208.7	186.3	182.4	175.8	149.5	146.1	132.8	126	123.6	113.1	100.5	92.87	100.9	96.85	88.68	92.37	86.28	88.61	86.31	94.47	89.29	84.02	78.15	64.9	54.94	45.57	84.1	96.7	40.6	18.94	14.07	10.54	7.887	6.333	5.302	5.781	8.16	114.9
								202.3	220.2	154.2	164.2	198.7	165.4	174.3	168.3	145.6	146.9	125.9	115.2	105.6	99.14	95.49	84.17	92.14	88.44	89.91	97.32	92.29	95.3	86.47	90.37	81.07	83.64	74.33	65.52	53.86	51.46	64.19	101.6	53.22	20.23	14.53	11.63	9.32	6.412	5.005	6.587	7.412	23.86
								186.9	191.5	195.8	199.5	192.2	175	181.4	155.2	160.2	146.8	130.6	106.6	105	104.5	91.73	83.11	92.29	83.54	83.05	88.93	90.41	85.07	89.91	88.14	85.05	82.71	72.62	63.5	56.58	44.46	48.92	95.61	70.8	23.68	13.51	10.1	6.533	7.055	5.192	4.876	5.709	10.17
								188	192.3	165.9	165.3	172.4	162.2	154.7	159.8	150.2	139	144.5	98.49	98.73	89.1	88.89	88.46	91.48	85.1	69.42	87.71	89.84	80.92	85.22	82.76	76.58	76.97	69.77	65.61	54.03	41.88	36.42	76.96	82.67	28.64	13.77	11.97	9.629	7.19	6.456	4.548	4.787	6.611
										174.6	162	146.2	165.5	163.4	156.9	147.3	127.6	121.3	104.4	98.98	87.41	86.12	78.94	92.13	83.15	79.54	80.05	78.95	80.8	76.57	80.73	78.76	70.51	65.8	63.77	48.87	41.63	37.68	59.3	86.07	37.2	18.09	8.694	10.12	6.796	6.348	5.096	5.766	5.937
										152.6	163.9	161.8	148.5	165.5	143.8	142.2	125.7	118	93.43	91.82	84.43	86.63	83.78	75.51	74.28	75.25	77.04	77.77	77.33	77.03	76.13	75.28	73	60.44	56.33	50.16	42.84	34.67	42.16	79.11	52.89	17.9	9.647	8.262	7.076	5.634	6.077	3.882	5.452
										156.4	152.8	167.5	147.9	133.7	140.1	125.2	119.1	109.2	98.33	82.64	77.63	78.57	76.6	69.01	70.64	71.87	78.81	75.61	76.08	68.81	72.68	76.92	72.35	58.4	63.03	50.86	41.69	32.73	33.68	68.96	69.7	21.87	10.74	7.963	6.71	4.902	5.714	4.149	4.09
										163.3	171	161.7	153.1	137	146.4	127.9	114	104	94.26	89.05	84.96	70.95	74.7	71.89	68.37	69.3	65.97	67.21	74.93	71.5	69.8	66.7	68.26	64.54	54.08	47.87	38.59	31.12	32.17	52.93	69.87	31.06	13.06	8.081	7.724	6.31	5.812	4.792	4.321
										165.5	149.6	151.9	165.9	129.9	136.5	133.3	119.7	103.6	95.72	85.32	85.4	66.19	67.55	64.82	68.15	60.11	62.76	66.56	68.49	65.65	69.25	68.11	65.37	60.73	56.96	42.29	34.8	29.79	27.32	38.27	68.24	40.06	14.13	9.702	7.287	5.432	6.079	5.198	4.307
										163.1	131	151.7	145.2	129.7	133.8	128.1	119.5	96.7	84.55	77.93	72.84	68.77	63.07	60.87	66.78	62.08	59.08	63.23	65.66	60.47	66.42	63	61.19	55.14	51.13	40.76	34.78	30.64	22.59	29.88	64.14	49.72	15.11	9.273	7.956	7.538	4.809	4.796	3.835
										145.4	140.5	145	150	132.9	140	112.5	107.4	92.13	95.56	73.62	69.35	65.47	63.82	51	63.37	58.94	61.1	56.09	62.83	59.4	63.46	66.62	59.63	57.36	49.29	41.03	39.22	29.01	24.34	25.97	50.28	61.29	23.4	11.44	7.432	6.385	6.35	4.862	4.775
										149.8	134.3	137.4	135.1	140.8	139.7	118.2	95.49	95.7	77.73	68.05	66.68	61.52	63.2	57.43	62.85	61.94	52.78	57.23	59.35	60.1	60.25	56.34	61.49	59.32	50.62	42.92	35.64	30.9	24.16	22.22	35.67	61.86	28.57	11.91	7.705	5.799	7.432	5.185	4.873
										171.4	147	128.3	128	121.5	131.2	119	96.74	93.41	76.72	70.51	69.53	58.24	60.56	61.97	55.94	51.9	52.18	55.08	61.81	57.74	55.72	59.65	55.83	54.32	45.48	38.43	36.88	27.21	22.85	22.09	26.61	56.93	42.18	14.18	9.21	6.093	5.722	5.96	6.051
										169.4	126.1	114.5	122.6	120.2	109.1	104.2	99.25	81.15	77.18	64.72	62.11	60.11	52.63	55.38	52.47	51.07	54.22	55.44	58.52	56.33	52.84	53.74	51.69	49.92	43.73	37.44	34.38	28.71	24.49	19.95	21.96	47.51	48.96	19.54	10.47	7.426	6.528	6.64	5.532
										151.6	138.2	127.5	117.4	136	114.8	101	86.45	85.05	75.28	69.04	59.16	62.29	51.91	47.76	52.07	48.43	51.8	48.74	52.02	52.91	50.46	50.95	46.58	48.91	41.42	38.97	32.62	26.46	25.86	20.62	20.16	33.31	51.45	23.52	11.01	6.356	6.342	5.904	5.852
										343.7	111	129.8	119.8	116.8	106.5	97	94.46	75.01	74.1	67.8	68.26	57.9	50.6	48.89	50.34	49.19	50.83	51.54	48.65	53.92	49.46	56.47	49.75	44.06	43.38	38.01	31.06	26.98	22.41	21.54	18.81	26.36	50.35	29.01	11.78	7.514	6.925	6.585	5.431
											129.3	133.2	123.8	105	115	103.3	98.36	83.38	72.34	64.04	57.87	51.01	49.43	48.14	45.33	47.28	51.63	46.8	47.02	51.45	53.39	48.76	49.7	45.58	38.01	43.52	33.93	27.54	23.16	19.49	18.99	19.49	44.55	37.75	11.75	7.458	6.553	6.599	5.789
											133.4	133.7	125.5	110.3	109.9	103.4	93.65	80.54	72.14	63.46	51.05	48.43	46.55	46.89	46.37	45.11	49.13	45.62	47.58	44.97	43.86	44.73	43.43	45.91	40.22	35.92	31.75	27.86	21.71	19.38	16.59	18.37	35.3	42.45	20.33	7.465	6.856	5.855	5.051
											132.2	117.7	128.7	115.5	86.52	104.6	76.54	71.71	63.54	47.85	48.34	51.19	50.69	42.64	42.38	41.66	44.34	42.17	44.06	44.29	44.46	44.98	41.05	38.99	33.62	29.93	29.72	25.58	22.67	18.89	14.83	14.5	23.94	45.24	27.81	9.346	5.984	6.063	4.613
											166.3	107.7	107.9	106.9	101.4	97.38	75.49	66.07	64.51	53.73	51.67	45.71	47.38	45.83	42.62	42.14	38.78	46.57	43.56	40.07	44.51	43.09	41	39.15	38.41	32.96	28.17	24.74	24.37	17.23	15.17	16.37	18.02	41.62	30.09	10.76	7.885	5.306	5.943
											319.5	123.9	120.2	116.4	102.6	80.78	76.74	67.68	60.13	54.81	48.79	44.94	40.68	44.02	41.91	41.91	37.88	41.74	39.05	41.04	42.93	38.1	41.3	36.82	35.03	31.18	28.29	24.24	21.13	16.16	14.28	14.76	15.9	30.82	37.18	16.62	7.85	6.102	5.52
												118.4	105.9	114.3	93.5	83.83	79.74	67.87	58.91	53.51	50.11	43.76	38.17	38.51	39.61	36.32	37.7	40.83	43.48	37.45	41.5	37.79	37.41	39.31	36.1	28.89	27.52	22.04	21.69	16.88	14.72	12.13	13.68	23.6	38.1	20.49	8.692	6.795	5.26
												120.5	97.07	93.78	91.76	82.66	70.94	63.34	58.89	56.82	41.45	38.87	36.09	39.43	35.11	38.22	37.57	37.4	40.66	39.4	37.51	34.84	37.83	34.44	35.85	28.52	24.58	23.89	20.51	17.84	14.96	13.68	13.06	17.31	35.81	26.31	9.317	6.762	6.427
												109.9	108.7	103.6	92.7	81.14	77.78	58.78	52.37	50.3	42.35	40.71	38.71	37.53	37.56	32.42	36.99	40.51	37.58	35.31	36.12	39.03	35.82	38.04	30.57	26.46	24.75	22.99	18.65	17.32	14.39	15.03	11.95	15.84	30.94	34.15	12.64	6.883	6.442
												130.9	90.9	99.18	92.62	78.45	63.85	56.22	55.24	42.38	41.43	37.14	38.19	29.2	31.45	34.67	31.16	34.37	33.11	32.72	35.1	33.39	31.39	34.68	31.5	25.93	23.13	23.4	17.78	15.07	14.01	13.93	12.82	12.9	24.26	35.97	18.66	8.738	5.962
													103.3	94.16	85.67	83.27	69.8	54.85	53.39	43.73	42.42	34.7	38.64	34.73	35.19	32.4	29.92	33	31.05	31.41	32.51	32.72	33.08	29.75	30.11	26.19	23.23	22.92	18.74	16.72	13.94	11.35	11.97	10.31	19	30.91	21.41	8.531	6.499
													97.16	93.89	88.06	82.15	53.66	57.78	45.39	43.12	40.19	36.52	36.63	32.07	31.79	30.73	30.49	32.39	33.43	31.3	32.85	29.95	33.33	28.15	27.04	26.63	24.5	20.76	19.77	14.37	12.98	11.83	12.7	9.78	14.55	31.97	27.1	10.74	6.737
													107.8	89.08	85.41	79.04	63.1	51.99	42.71	39.5	36.74	35.81	33.93	32.37	30.94	30.23	26.72	31.12	29.54	32.12	32.43	30.31	30.46	28.5	28.5	25.56	20.44	19.94	18.74	12.75	14.77	11.17	11.01	9.891	12.27	26.28	29.88	13.27	6.156
													92.47	90.96	84.95	74.19	64.48	52.46	48.39	38.39	36.4	30.46	30.81	28.72	32.85	26.96	27.62	31.53	27.55	29.94	26.94	32.45	26.62	28.98	28.61	25.65	21.3	19.15	17.38	14.55	14.49	12.14	10.78	9.682	11.2	17.32	32.02	17.96	6.666
													107.2	92.19	68.71	70.65	60.7	50.37	46.56	41.36	35.65	33.38	29.84	30.43	27.91	26.24	27.95	25.23	28.81	27.84	30	28.59	27.07	27.37	27.39	24.3	20.77	17.37	16.45	13.65	10.97	12.89	11.97	9.545	8.289	13.39	26.48	23.63	9.7
													178.3	95.11	82.31	68.87	65.11	42.8	33.65	38.06	30.88	26.6	30.24	29.75	28.85	26.16	24.7	25.93	27.84	25.02	27.26	28.5	24.67	26.6	24.41	21.18	21.11	16.85	17	16.32	11.68	11.15	10.5	9.918	9.991	11.28	24.48	26.11	10.78
													636.4	85.57	64.86	66.77	56.63	46.55	42.83	28.35	33.01	30.16	28.77	26.32	23.85	24.83	23.44	26.67	26.87	27.66	30.21	26.55	28.62	23.52	24.86	23.58	19.09	17.47	14.83	13.65	12.4	9.654	9.764	7.462	8.971	11.33	19.57	25.81	13.15
														94.34	69.47	68.23	55.95	40.59	31.75	33.46	28.17	23.51	29.39	23.86	24.52	23.28	26.76	22.99	22.91	25.23	27.13	25.34	24.51	23.81	20.76	21.91	19.26	16.73	14.96	13.43	12.57	10.48	10.3	10.51	7.579	9.244	14.59	25.45	16.66
														86.83	77.95	66.93	54.32	37.66	32.07	32.05	26.72	26.89	27.3	26.17	27	21.25	22.5	21.67	23.13	24.02	23.62	25.48	23.53	23.07	21.18	19.71	17.5	15.47	14.17	13.55	10.74	10.66	9.989	8.72	7.431	9.625	11.69	23.73	20.42
														92.16	90.04	63.07	38.64	42.64	36.76	32.75	27.59	21.89	23.47	26.46	22.84	21.37	23.08	22.83	23.24	24.79	20.72	25.14	23.35	23.22	17.84	17.97	15.78	15.43	11.5	14.29	10.45	12.29	10.13	8.588	9.873	9.066	9.426	20.96	22.97
														143.6	75.71	69.76	50.92	40	34.1	29.28	27.4	25.7	23.45	24.23	18.6	21.56	22.85	22.53	19.01	20.98	24.45	20.97	21.69	21.05	19.16	16.96	18.46	15.61	12.94	12.04	9.87	11.28	9.587	8.56	8.106	9.934	7.676	17.16	23.31
														539.2	81.03	64.54	48.33	46.39	29.89	25.09	23.15	23.84	21.37	18.07	20.68	19.91	23.49	19.94	20.48	21.6	24.19	20.65	24.54	21.91	19.71	16.53	14.33	15.69	12.76	11.73	11.92	9.963	9.288	9.142	7.95	7.195	8.969	11.46	21.29
															72.17	57.6	54.19	41.87	26.8	23.14	26.71	19.68	22.11	20.37	17.9	20.76	16.86	18.3	21.82	18.18	20.26	16.78	20.59	18.37	19.28	15.14	13.3	12.25	10.48	12.38	9.184	7.623	9.023	7.871	7.693	7.384	6.615	8.928	20.18
															67.11	56	46.27	31.71	27.73	30.9	23.73	19.45	22.48	20.33	20.57	18.1	18.5	17.37	19.84	16.96	18.93	18.57	16.68	19.73	17.41	14.94	14	14.1	11.17	11.27	9.659	8.587	10.09	8.62	8.924	6.822	6.819	6.254	15.02
															80.79	56.07	48.82	29.62	25.25	23.79	19.04	20.65	19.86	17.5	18.77	20.75	16.72	20.02	19.95	17.01	15.4	19.12	17.59	20.8	14.31	14.63	14.69	13.63	10.67	9.772	8.256	7.948	8.565	7.002	8.155	6.688	6.715	7.052	12.44
																56.08	53.12	38.05	23.07	25.24	17.07	22.47	20.03	17.71	17.81	15.47	13.79	17.59	21.15	19.22	17.96	16.45	17.27	15.62	15.5	13.46	14.39	11.81	11.23	10.4	9.914	10.81	7.922	6.215	7.369	5.478	6.03	6.551	7.417
																60.77	46.45	30.14	27.68	22.91	16.1	19.19	19.31	16.3	17.24	15.86	14.54	13.73	18.24	17.61	15.53	19.28	16.43	17.27	14.35	14.78	14.45	12.04	10.9	8.759	7.761	8.569	7.372	7.585	6.627	6.236	6.507	5.615	6.989
																56.23	44.8	29.56	27.58	20.11	14.67	18.52	14.31	15.1	14.8	14.53	14.19	14.8	16.75	16.13	16.41	15.86	15.87	15.6	16.14	11.29	13.01	10.65	11.24	9.856	9.336	7.017	6.479	6.21	5.379	5.279	5.466	6.698	6.277
																60.88	41.72	32.15	25.57	25.53	16.48	17.73	18.92	14.83	14.94	16.48	14.5	14.63	16.14	16.25	16.33	15.13	14.4	14.6	15.61	13.79	11.37	9.542	10.32	9.486	7.493	8.785	7.494	6.23	6.215	6.993	5.552	6.812	5.447
																57.21	42.89	28.05	30.01	22.38	16.32	17.72	14.81	16.52	15.55	14.85	14.34	15.03	14.4	14.02	14.42	15.74	14.24	13.85	11.1	12.83	10.67	11.72	7.462	8.156	8.064	7.65	6.545	6.39	5.594	5.179	5.696	5.562	5.726
																88.38	35.92	30.09	24.64	19.96	16.24	16.89	13.32	15.19	15.29	15.59	12.56	12.93	13.57	14.08	12.12	13.22	12.77	13.34	12.53	11.63	10.3	9.166	7.561	7.518	8.24	7.23	6.706	5.184	6.068	4.117	4.094	4.984	5.958
																336.4	36.33	28.82	21.54	19.7	14.82	15.99	13.76	14.66	13.68	13.89	15.61	13.25	12.82	15.03	14.9	12.23	13.35	13.88	11.16	10.53	9.486	8.819	8.49	6.348	7.292	7.727	7.037	5.018	5.567	5.53	4.912	5.489	5.234
																962.4	35.82	24.96	23.86	22	18.49	13.79	11.89	14.41	12.21	10.66	13.22	11.43	13.06	13.31	14.16	12.79	11.97	12.04	11.18	9.445	10.13	9.087	7.262	7.46	7.132	5.377	6.269	6.247	5.68	5.795	6.184	5.063	3.555
																	32.7	25.02	26.13	21.67	18.79	14.08	12.73	12.47	12.85	11.54	10.82	12.93	10.45	12.68	12.72	12.55	12.36	11.56	12.65	11.13	8.76	10.46	7.874	7.554	6.363	5.785	4.862	6.102	4.479	4.7	4.413	4.301	4.073
																	44.74	26.06	20.15	19.79	13.44	13.7	14.16	12.5	12.7	10.36	12.76	13.09	10.85	8.257	10.19	11.16	11.84	11.41	11.98	9.037	9.252	9.164	7.078	6.151	8.151	5.812	5.1	5.891	5.908	5.133	3.795	4.563	4.324
																	71.25	28.39	22.13	13.2	13.85	12.5	14.19	12.43	10.3	12.11	10.26	13.48	10.41	8.19	13.48	9.18	10.26	9.859	9.854	10.71	7.997	6.645	5.897	5.961	5.407	5.523	5.392	5.087	4.561	5.215	3.602	3.811	4.15
																	218.8	30.04	20.43	11.42	15.13	11.4	11.93	12.07	10.03	10.33	10.41	11	11.09	8.733	11.25	10.95	9.682	10.87	10.5	9.174	8.129	5.987	6.49	6.93	5.996	6.089	4.17	4.334	4.483	4.448	3.917	3.898	3.394
																	688.2	28.33	20.09	18.55	14.11	12.33	12.03	12.36	10.46	9.883	9.871	11.42	12.57	9.796	9.581	10.06	9.961	9.981	7.911	7.996	9.305	7.325	5.738	7.219	5.845	6.019	4.243	4.533	3.693	5.146	3.358	4.095	2.901
																		23.17	18.09	16.53	14.33	13.05	13.21	10.5	12.1	9.526	9.806	11.34	9.04	9.649	8.89	9.155	8.367	7.636	8.609	6.796	6.878	6.575	6.1	6.704	6.299	4.475	4.601	4.617	4.465	4.203	3.8	3.161	3.16
																		30.59	15.16	14.75	14.13	10.21	11.75	7.573	8.92	8.218	9.058	7.79	9.508	8.867	8.629	9.241	8.289	8.608	8.885	6.831	6.902	5.931	5.494	4.671	5.332	4.639	4.625	4.777	4.556	4.883	3.135	3.599	3.067
																		67.88	15.74	14.69	12.51	9.696	8.719	8.343	9.486	9.298	8.985	8.425	10.22	9.082	8.742	10.16	8.366	8.031	7.423	6.094	8.546	5.57	4.941	6.482	4.685	4.97	4.2	3.929	4.664	2.965	3.343	3.558	2.741
																		180.7	17.45	14.24	15.67	10.99	8.422	11.44	8.669	10.97	8.812	8.049	8.578	6.407	7.102	9.483	7.788	6.911	7.741	5.328	7.951	6.587	5.502	4.171	4.119	4.872	4.344	4.344	3.73	4.371	2.885	2.571	2.671
																		499.1	20.73	14.46	11.2	9.577	9.851	9.875	7.473	9.738	9.241	7.983	9.274	7.212	8.78	9.305	6.848	6.769	6.529	5.388	6.063	5.391	5.391	3.506	5.216	5.786	3.273	3.508	3.347	3.839	3.055	3.781	1.773
																			20.05	13.41	11.47	8.597	8.56	9.926	9.48	8.161	7.408	8.188	7.6	6.51	6.911	7.862	6.422	8.13	5.875	6.082	3.566	4.804	4.214	4.25	4.019	4.461	4.047	4.161	3.822	3.932	3.086	2.53	2.814
																			25.97	14.81	12.15	9.5	8.903	9.4	7.443	7.849	6.999	7.32	6.735	7.51	7.247	6.829	6.292	6.805	7.36	6.373	4.55	5.513	3.744	4.067	3.941	3.147	3.641	3.706	3.139	3.686	4.212	2.696	2.326
																			50.57	13.74	11.14	7.734	9.182	6.019	6.268	7.83	6.434	6.959	6.461	7.234	6.338	7.691	6.389	4.826	5.65	6.43	7.558	3.215	4.514	3.608	3.569	3.317	3.602	2.82	3.334	2.777	3.61	2.312	2.249
																			156.9	15.25	13.57	10.61	6.994	8.789	7.682	8.434	6.405	6.451	4.414	6.282	6.265	7.5	6.97	6.417	4.56	4.672	4.777	3.815	3.832	2.824	3.431	3.774	4.172	2.91	2.026	2.663	2.679	2.833	2.143
																			420.4	19.16	12.08	9.22	7.995	9.043	6.846	7.039	6.41	8.028	5.082	6.135	6.519	6.573	5.808	6.207	5.04	3.668	4.418	4.927	3.86	4.35	3.575	2.854	3.922	3.167	3.331	2.203	2.094	2.146	1.932
																				13.67	10.94	12.37	9.529	5.878	7.431	6.797	5.43	7.631	4.207	5.466	6.253	6.037	7.062	5.509	6.413	4.747	4.378	3.707	2.821	3.477	3.497	2.689	2.778	2.845	1.937	1.519	2.561	1.958	2.582
																				18.72	12.79	13.82	8.787	5.889	6.518	5.656	6.291	5.423	4.982	6.694	5.555	5.622	3.807	5.685	4.75	4.139	4.863	4.119	3.302	4.797	2.871	2.486	2.849	3.961	3.38	2.748	2.03	3.34	2.051
																				40.93	13.49	8.896	9.083	9.051	7.598	5.153	6.81	5.782	4.974	4.415	6.52	5.337	5.92	5.028	5.433	3.524	4.772	3.107	3.733	3.438	2.533	2.611	3.319	3.052	2.463	2.472	3.728	1.639	1.602
																				135.8	13.47	9.857	7.148	8.264	7.09	6.215	6.007	6.282	4.793	4.828	5.522	6.367	5.78	6.308	4.158	5.632	3.562	3.882	3.437	3.281	2.665	2.604	2.648	2.88	2.576	3.275	2.434	1.877	1.845
																				379.2	12.37	9.089	9.97	6.636	7.433	5.366	5.519	4.524	4.42	3.729	5.564	4.391	5.416	4.438	3.58	3.864	3.443	3.806	3.394	3.27	2.438	4.099	3.294	2.035	3.048	3.118	2.178	1.953	1.565
																				884	14.06	9.086	8.078	6.37	6.641	4.522	4.751	3.88	5.461	5.543	5.421	4.179	5.062	5.071	5.897	3.582	3.752	2.977	3.474	2.222	2.781	2.423	3.006	2.016	2.444	3.26	2.603	1.331	1.747
																					14.56	11.45	6.857	6.83	5.883	7.292	4.627	5.528	5.743	4.667	4.077	3.967	4.203	4.13	3.734	4.061	4.144	3.561	2.926	2.761	2.217	2.626	3.004	2.468	1.471	2.249	2.133	1.987	1.897
																					39.4	7.853	7.65	7.767	6.556	6.262	4.542	5.209	2.862	4.24	3.639	4.339	2.51	4.088	3.224	2.976	2.643	3.021	3.106	3.471	3.579	2.34	1.866	2.624	2.27	1.647	1.346	1.608	1.902
																					111.4	10.78	6.799	6.697	5.475	4.943	4.292	4.862	3.794	3.859	4.025	4.704	3.764	4.072	3.647	3.494	3.469	2.65	2.996	2.808	2.408	2.587	2.374	2.197	1.733	1.86	1.651	2.051	1.894
																					309.3	8.092	8.451	6.192	5.592	5.424	5.001	3.254	4.606	4.957	3.523	4.506	3.134	5.518	4.106	3.286	2.649	2.907	3.818	2.676	2.884	2.753	2.394	1.903	1.799	1.88	1.626	1.925	1.389
[truncated: 1 more columns]
