# Supplementary material for: Utilization and transformation of Chrysotila dentata-derived dissolved organic matter by phycosphere bacteria Marinobacter hydrocarbonoclasticus and Bacillus firmus
Source: PeerJ. 2024 Jan 4;12:e16552. doi: 10.7717/peerj.16552 (PMC10771764; doi:10.7717/peerj.16552)
Supplement: Supplemental Information 2 [file peerj-12-16552-s002.xlsx]

## Sheet: Sheet1
-1.752	83.86	136.6	187.8
21.29	72.01	191.4	372.6	348.2
13.47	88.7	71.24	278.3	216.1
7.069	76.51	64.36	301	357.3
122.3	85.69	55.05	226.7	623.1	392.8
27.48	87.87	69.36	178.5	612.4	356
104	129.8	101.2	44.35	420.3	560.5
233.4	194.8	143.7	91.81	354.4	656.2	272.2
51.18	165.3	135.4	43.67	251.2	712.5	377.7
146.1	52.26	147	74.69	217.5	678.3	640.8	443.6
70.31	98.67	111.7	128.8	83.15	535.3	848.1	280.2
73.23	92.05	85.58	118.2	123.8	281.8	909.9	455.4	864.8
70.07	137.1	153.7	165.5	55.9	132.9	749.6	717.6	277
80.12	139.4	31.37	123.3	93.28	116.5	532.5	869.9	249.4
224.6	77.75	146.8	77.87	124.4	110.9	298.1	931.4	459.3
60.4	126.3	118.6	63.15	70.74	86.63	164.4	801.2	801.3	227.7
149.2	138.6	134.1	166	180.9	135.6	90.79	488.1	969.9	269.9
74.05	197.7	67.55	126.1	162.4	101.6	77.14	245.1	981.6	482.9	314.6
60.27	128.9	179.4	199.4	143.7	94.93	127.8	150	802.8	846.7	207.8
169.4	141.1	161.1	182.9	131.3	153.2	107.4	79.29	464.4	1085	283.5	542.8
278	294.2	122.1	91.43	153.7	138.5	110	77.61	261.7	1148	560.7	206.6
151.8	158.4	204.1	214.2	121	90.33	99.66	80.77	126	841.1	974	207.3
214.5	163.3	219.8	198.7	246.3	204.1	93.82	76.51	87.88	501.6	1214	337.9	334.5
227.4	194.3	179.5	317.5	302.6	179	81.75	48.64	78.03	273.3	1261	637.6	198.3
204.6	109.2	183.9	279.4	298.4	244.5	113.8	98.37	56.47	130	935	1123	229.1	609.7
167.1	248.9	160.2	388.1	431.4	338.7	166.6	86.79	74.73	95.59	538.3	1455	360	296.7
297.1	236	304.2	301.7	591.4	301.4	162.7	89.58	58.6	86.99	292.6	1436	750.2	233.1	1430
214.7	248.5	279.1	498.7	649	433.5	206	98.53	80.02	60.43	175.4	1102	1205	266.4	438.8
229.5	276.2	315.5	614	714	570.9	249.1	142.4	59.09	53.75	98.59	596.3	1569	464.4	302.8
301.9	234	326.9	443.8	772.9	559	295.1	120.6	84.6	68.26	89.44	303.5	1568	885.6	308.7	745.4
243.1	177.1	330.5	542.8	896.4	687.4	412.6	165.2	102.9	89.43	117.4	184.8	1155	1415	379.2	389.5
341	281.8	265.3	382.8	785.1	657.1	385.5	181.4	114.1	87.07	124.3	161.9	723.6	1766	573.7	331.1
225.6	341.6	216.7	468.7	790.1	753	423.2	219.3	137.9	112.2	161	166.2	415.8	1780	964.6	367.1	476.5
319.3	244.1	189.8	698.9	767.8	857.6	462.2	181.1	139.9	117	134.6	182.7	303.6	1398	1563	419.9	329.4
214	283.4	338.4	708.6	826.4	870.3	500	296.4	115.7	144.2	160.2	200.1	249.4	865.2	1944	633.3	314.5	667.4
306.3	296.2	249.9	426.7	870	810	505.7	289.3	164.1	172.2	186.3	226.1	267.7	550.7	1974	998.9	341.4	322.2
291.9	240.8	297.3	526.1	803.6	842	561.6	323.2	184.3	147.1	180.4	240.3	311.4	403.4	1588	1621	412	278.6
223.8	140.7	281.2	483.7	761.6	884.5	605.9	315.4	166	168	216.7	259.9	296.4	409.6	1052	2012	591.5	268	307.1
226.9	75.19	398.7	489.5	797.6	838.7	502.9	356.2	188.7	194.6	211.2	265.3	313.8	427.5	718.3	2033	964.4	295.4	221.8
213.8	257.4	253.3	446.9	806.8	736.7	601.5	346.6	179.1	194.8	254.7	316.2	383	497.9	597.9	1594	1481	345.9	227.7	394.1
345.4	297.7	173.4	462.2	658.1	831.9	594.4	373.1	241.5	250.3	280.1	348	417.5	462.5	559.3	1183	1878	482.8	206.3	195.3
302.1	190.9	222.7	549.8	784.6	768.6	711.5	349.3	288.7	250.2	326	393.4	486.1	548	613.2	852.8	1864	827	223.7	159.9	663.9
124.7	142.5	183.1	620.1	847.3	853.5	667.5	457.3	310.1	307.6	349.3	453.1	516.2	595.6	650	732.5	1551	1306	284.3	172.3	197
190.9	150.2	332.5	653.4	894	905.9	692.9	450.7	339.9	292.7	409.8	474.8	532.7	694.8	736.2	748.1	1107	1711	425.8	185.5	134.9	1260
151	287.9	297.9	862.9	1181	912.9	710.4	429.9	345.7	325.5	440.8	537.7	680.8	768.4	786.7	763.8	848.4	1773	716.5	209	126.2	278.6
161.7	178.6	274.5	795.1	1260	966.8	684.1	422.6	334.4	369.7	433.8	596	747	789.9	831.6	801.9	760.7	1471	1101	243.5	124.3	126.7	2551
95.82	149.8	284	801.2	1334	1147	730.7	431.4	383.5	394.6	473	607.1	784	865.4	941.5	833.4	768.4	1108	1456	343	123.1	103.2	534.6
133.4	216.3	287.6	751.5	1354	1148	763.4	532.8	394	427.3	497.6	667	852.7	852.6	915.9	911.5	763.6	806.9	1471	570.6	134.5	100.4	152.4
228.4	260	256.3	719.1	1025	1121	748.9	514.5	402.3	426.3	562.2	673.2	852.8	935.6	978.2	937.1	736.9	681.2	1311	896.8	172.4	104.9	98.88
224.1	233.2	280.5	782.4	1338	1279	833	583	422.8	463	576.3	722	888.9	972.5	1001	956.6	747.5	629.9	954	1152	264.6	101.8	85.29	222.3
183.7	208.2	251.6	842.7	1399	1237	909.6	468	386.9	465.4	554.6	709.5	856.3	1034	1012	941.6	790.4	624.9	673.2	1232	435.3	96.39	82.86	96.93
168.6	198.5	225.5	719.7	1459	1133	829.7	554	410	509.8	596.9	737.5	829.7	953.4	1062	977.1	818.6	626	512.8	1080	715.3	130.8	80.2	77.27	379.6
126.7	87.13	244.3	688.3	1409	1061	768.5	509.4	438	473.4	653.2	744.3	887.6	964.5	1005	952.3	818.2	634.7	471.2	760	962	193.5	85.83	77.3	119
174.8	135.3	332.6	692.1	1393	1128	810.6	604.5	453.7	515.9	561.9	777.7	905.1	960.8	1046	948.2	829.3	647.1	472.6	531.3	1039	347.4	90.67	80.04	83.76	742.5
183.4	251.1	198.8	854.7	1284	946.8	737.1	568.2	445.6	532.4	584.3	717.9	848.9	1009	1010	974.2	795.5	636.9	493.3	372.2	887.6	585	116.2	87.31	78.39	184.2
269.7	204	276.1	840.6	1151	1088	780.9	580.3	423.5	441.1	611.4	692.7	837.4	945.3	994.9	936.6	809.8	663.8	475.7	319	655.2	831.2	181	101.3	85.08	91.05
319.7	138.3	343.5	575.8	1280	1065	688.5	562.3	502.2	445.2	621.4	642.8	807.3	859.4	976	936	792.4	619.1	450.3	301.9	429.8	909.9	315.9	113.2	89.44	88.91	286.6
156.3	193.4	169.2	679.2	1243	1012	718.5	502.1	474.2	463.1	536.1	648.5	782.4	878.3	917.3	867.9	790.6	607.6	480.7	314.5	290.9	834.2	518.8	135.1	104	97.81	111.2
61.89	111.5	173.8	641.3	1027	1016	749.6	460.1	456	505	504.1	637.8	730.7	876.6	891.8	867.6	772.7	585.9	448	313.3	241.5	603.4	722.5	184.3	111.1	104.2	91.71	487.2
76.25	169.4	212.8	739.9	1021	899.3	741.9	480.8	416.8	454.4	505.8	636.5	743.5	827.4	873.9	842.9	741.2	578.3	460.1	308.8	245.1	423	846.7	291	120.6	103.6	84.37	130.5
141.5	183	190.5	587.7	840.6	811.7	781	494.3	392.4	399.5	431.1	601	701	769	831	798.1	711.9	588.3	460	311.5	246.6	276.1	751.7	464.9	140.2	112.5	90.96	82.75
156.7	232.8	179.7	526.4	806.4	880.7	705	467.1	457.3	392.5	436.9	576.2	662.2	755.3	778.7	775.3	728.8	603.7	445.4	333.3	233.5	240.7	584.1	667.4	203.5	112.7	92.52	70.42	199.6
132.1	273	238.5	597.4	737.3	768.1	714.2	455.9	410	434.6	480.2	529.7	634.3	693.6	733.6	745.7	679.1	556.2	463.6	334.7	252.3	230.9	413.7	762.8	281.7	134.9	110.6	70.56	81.21
146.3	167.2	164.1	467.3	837	934.6	639.2	569.8	392.6	382.8	411.6	573.9	641.6	679.3	772.4	729.6	632.7	545.3	473.9	312	256.8	229.7	294.8	713.6	432.4	141.9	111.5	83.03	57.71	368.4
252.3	176.5	312	506.9	794.8	771.1	605.8	520.4	364.4	379.6	424.5	513.4	613.6	701	702.4	716.7	630.5	544.1	467.3	324.2	248.1	221.3	259.7	577.9	586.1	188.3	119.8	89.82	56.74	100.7
206.9	108.7	130.1	489.8	695.8	652	571.8	446.8	355.1	370.9	399.1	476.7	532.4	643.2	670.5	692.5	602.3	518.8	443.8	322.1	260.9	242.5	237.9	427.7	685.4	252.3	123.6	86.76	65.49	53.14	859.2
156.3	204.3	168.8	499.5	713.8	649.4	562.6	433.9	361.3	355.1	384.9	478.2	515.7	608.9	648.3	683.9	608.3	508.9	428.6	321	266.8	250.2	241.2	312.6	691.8	397.7	142	90.97	59.9	47.37	171.7
85.25	185.4	216.4	333.5	650.2	659.5	624.5	449.4	376.2	349.5	374	425.7	550.4	601.2	605.6	598.1	590.6	502	400	340.7	258.9	244.5	233.8	263.4	584.4	553.9	169.7	101.6	62.21	48.56	65.11	1698
165.7	182.2	173.9	304.3	607.5	649.5	538.8	386.7	359.2	344.2	396.7	427.8	508.1	576.9	631.3	595.2	576.8	515.7	392.4	333.7	270	240.4	234.3	248.5	441.6	634.3	234.7	102.9	73.28	49.13	42.24	336.3
118.2	160	170.1	431.2	552.5	667.9	476.7	429.9	365.2	323.6	363.5	405.7	499.6	581.2	586	566.3	558.4	469.8	398.7	334.6	278.9	241.2	240.9	246.4	329.4	647.2	341.8	118.1	75.81	51.47	42.89	83.71
245.5	123.4	202.6	325.3	527.5	687.8	531.8	424.7	372.5	326.3	360.9	377.3	479.4	488.9	569.2	572	518.7	477	391.3	325	293.4	245.6	244.7	238	266	552	456	140.1	78.36	59.7	41.62	47.39	749.3
333.2	225.3	171.6	262.2	559.5	674.4	513.5	407.3	343.3	326.7	338.3	395.7	472.4	494.1	535.7	535.9	482	464.9	397.1	331.6	275.7	256.2	247.8	246	236.8	412.8	540.5	192.6	87.94	63.39	47.18	39.49	150.9
198.7	93.24	111.8	296.4	639.9	568	548.9	372.8	345.4	304.4	374.7	384.6	426.5	459.7	540.5	535.7	502.1	455.4	399.7	322.8	285.6	253.4	245.3	245.6	227.1	310.3	567.6	265.4	86.15	65.37	48.93	38.37	51.75
102.6	93.54	91.72	307.9	429.5	569.6	431.7	327	344.9	323.3	336.7	362	421.7	441.8	468.5	509.5	489.2	427.5	409.8	299.6	277.3	247.6	259.3	227.5	230.7	247.6	501.3	383.7	104.9	72.91	51.23	43.84	39.38	323.8
100.4	72.11	104.9	329.3	472.2	538.5	454.9	353.4	305.3	304	318.9	319.2	413.5	440.5	484.9	500.9	455	406.4	379.1	300.2	286.9	252.9	264.2	237.8	234.2	217.6	388.2	473.3	157.3	73.77	57.12	44.4	34.44	81.8
119.2	117.8	205.9	319.6	468.6	603.2	357.6	368.7	285.1	320	337.4	328.6	366.1	425.1	441	455.4	456.1	373.7	355.1	313.4	276.8	257.7	249	232.7	229.6	224.4	291	503.9	231.6	81.7	55.83	47.68	39.56	43.09	699.9
77.34	133.7	140.1	280.4	467.9	469.9	449.8	366	298.6	284.5	321	304.4	382.1	390.8	430.4	424.2	416.7	391.9	344.6	286.1	260.1	253.1	258.2	243.2	226.6	219.5	221.1	464.3	319.5	88.77	61.9	50.35	38.16	34.66	138.5
143.4	126	121.5	260.4	315.5	423.6	373.2	352.8	320.1	288.5	295	304	335.9	359	426.8	462.5	415.6	382.6	352.3	288.1	262.1	256.8	253.2	244.7	220.4	214.7	189.4	364	402.3	133.9	66.92	52.48	43.4	35.66	48.28
221	147	146.7	256.1	326.7	379.2	369.4	335.5	325.8	306	311.7	325.6	325.4	390.1	394.6	404.5	393.5	359.6	334.1	297.9	260.6	236.1	249.2	232.3	225.5	195	190.7	250.2	444.1	185.5	74.39	54.46	50.62	40.33	35.75	285.6
189	79.59	183.6	230.2	497.5	357.2	410.8	344	262.7	290.2	291.3	301.7	296.8	370.3	411.3	369.5	416.4	343.2	327.7	292.6	237.3	241.4	251.1	219.8	224.7	207.4	183.6	198.3	402.7	270.3	87.89	56.03	49.71	41.68	32.32	70.48
572	151.6	126.5	229.5	410.2	350.8	375.6	293.5	240.5	298.7	273.4	308.6	332.5	331.9	364.6	390.7	368.3	363	316.9	280.5	258.4	241.1	239.4	239.1	218	199.5	175.2	158.9	330.4	350.2	111.9	65.82	52.56	46.39	33.58	35.25	623
1297	216.6	149.7	283.5	390.6	424.4	411.4	373.9	273.4	257	274.7	334.4	321.6	357.9	353.1	372.8	350.5	334	318.1	269.3	245.1	252.9	240.2	236.7	213.7	208.2	182.8	155.1	248.2	392.1	168.4	69.41	59.41	47.97	38.11	31.58	119.9
1889	175.9	122.5	259	365.9	402.3	354.5	317.2	265.4	264.5	294.2	309.6	299.4	340.3	353.8	343.5	358.1	315.1	299.4	281.7	249.8	239	244.5	231.3	210.2	206.3	177.7	163.8	176.5	366.7	231.1	85.61	63.23	51.74	37.49	32.8	41.24	1270
	114.1	137.1	326	337.6	307.2	385.3	301.1	265.1	287.4	279	275.3	302.2	332.9	328.6	323.9	321.8	316	299.9	262.5	242.4	238.2	228.3	225.4	220.7	196.3	180.8	154.6	145.6	304.6	314.3	111.2	63.02	52.79	42.69	30.06	33.92	238.9
	283.9	73.7	222.2	355.3	345.8	320.2	285.9	269.2	263.3	264.2	273.5	312.4	323.4	342.7	321.1	319.3	311.2	295.3	271.4	247.6	227.6	235.4	224.8	214.7	197.7	193.3	160.7	139.5	232.5	357.8	148.6	68.67	57.04	46.59	36.14	29.75	58.98
	874.6	202	300.9	384.7	347.4	364.3	240.3	322.3	260.8	315.1	283.9	314.5	311.1	340	306.1	311.6	311.1	283.3	265.9	241	222.6	226.9	212.1	208.1	186	179.9	154.2	135.4	182.3	351.7	205.6	73.75	60.46	47.65	40.2	29.47	29.66	541.3
	1634	181.6	182.2	454.8	334.9	355.1	346.7	243.8	261.4	271.3	277.4	295.6	288.1	304.4	348.9	324.6	290.3	284.8	255.4	238.1	216.8	215.6	212	212.8	192.9	188.9	160.3	133.1	141.9	290.5	281.3	101.1	64.57	49.92	41.18	33.13	25.59	104.8
		154.9	302.5	331.7	346.7	314.4	333	283.1	259.7	269.1	288.6	317.2	280.5	268	325.3	320.4	297.9	285	248.4	210.8	229.7	202.9	218.8	200	192.2	184.1	160.2	133.6	128.8	220.5	322.3	134.3	69.02	56.5	42.65	34.06	24.86	39.11
		199.4	268.1	353.5	330.1	388.1	298.9	250.2	275.6	253.7	275.7	278.5	302.7	273	306.9	306.9	282.7	274.5	233.5	217.8	216.6	202.6	210.5	198.9	184.8	188.5	158.7	146.2	131.3	167.1	324.1	191.8	80.06	57.71	42.47	36.71	27.71	26.92	206.4
		362.4	177	337.8	389.7	324.8	234.7	303.2	264	254.2	259.6	261	261.2	282.2	313.6	284.2	269.4	281.6	238.4	220.7	205.8	198.8	205.2	190.5	186.3	184	161.3	137.3	130.5	140.6	284.3	253.3	91.21	63.09	46.41	38.56	27.29	22.91	51.96
		1022	182.7	346.4	379.6	308.3	323.1	267.3	247.5	231.6	264.4	266.9	257.8	280.5	264.6	276.4	295.9	257.5	226.1	215.4	209.4	214.4	205.2	189.9	183.1	185	153.6	145	135.2	122.1	220.5	301.5	119	64.62	52.02	38.51	29.5	20.69	25.59	449.2
		1940	182.1	191.3	315	315.1	303	225.2	228.9	236.8	241.1	224.8	263.8	254.5	274.2	284.4	274	264.4	225.9	210.9	198.5	201.5	192.3	187.2	175.4	176.1	152	140.3	134.3	127.5	174.4	306.1	161.7	69.72	50.75	37.79	31.82	22.36	20.06	84.07
			106.4	256.6	322.2	258.8	289.2	283.2	227.7	276.3	243.4	231.9	250.4	240.4	262.1	271.6	264.2	247.7	240.8	204.5	201.2	191.9	188.1	183.6	172.6	165.6	156.1	145.1	138	124	141.5	283.3	212	84.08	59.18	40.66	32.51	25.73	19.74	29.38
			263.1	261.1	363.8	328.5	310.5	254	233.4	266.4	250.1	236.5	241.1	264.7	251.1	265.6	253.8	242.6	202.5	202	196.2	191.7	186.5	177.5	170.5	163.1	151.5	143.6	136.4	114.2	124.8	228.4	280.6	104.3	58.81	41.17	33.05	21.63	19.13	19.25	194.7
			593.9	218.4	378.6	323.8	272.4	260.5	250.3	254.2	215.8	241.6	228	251.4	276.1	245.2	247.7	234	189.6	214.4	186.8	186.7	183.5	179.8	163.6	159.3	156.5	144.2	131.6	125.7	114.8	168	281.5	145.4	60.15	45.43	35.32	24.42	20.23	16.53	42.27
				208.8	372.3	318.1	261.9	246.2	248.2	234.9	259.8	231.2	231.2	262.5	245.1	251.6	253.7	216.4	223.4	200.2	185.1	172.4	174.8	172.2	159	155.3	152.4	143.9	125	129.4	109.5	141.3	269	182.7	70.52	49.06	33.45	26.85	21.03	16.61	19.92	426.3
				348.3	321.8	253.5	298.8	242.7	257.9	271.3	247.4	245.4	238.1	251.3	248.1	234.6	255.3	227.4	214	183.3	172.7	166.7	170.4	162.7	168.2	158.7	145.8	140.8	129.7	120.1	107.3	116.7	222.3	226.6	86.9	47.7	32.72	28.88	22.17	17.2	15.36	79.38
				321.7	295.1	245.3	285.8	251.3	285.8	244.2	261.6	237	226.2	232	260.6	246.3	238.9	232.4	205.8	184.6	178.6	167.3	165.8	165.5	151.5	149.8	150.1	139.9	129.6	128.7	119.4	109.3	167.2	240.4	110.3	50.85	35.96	28.02	21.83	17.32	15.07	25.33	895.5
				398.4	324.3	268.6	307.2	233.6	266.7	228	249.3	238	233.2	226.7	235.3	215.3	243.5	203.2	189.9	168	177	168.1	161	159.1	152.8	152.3	137.8	139	127.6	128.3	113.6	108.7	126.8	232.8	153.8	61.06	40.02	27.65	21.25	15.89	15.87	13.79	165.4
				888.2	341	274.5	258.7	249.7	243	268	231.3	227.7	223.4	220.9	219.9	224	216.5	213.7	187.1	161.5	170.6	162.4	159.4	149.4	154.9	158.6	141.9	131.5	127.6	122.6	113.1	109.1	114.9	211.9	186.8	69.97	38.91	34.39	21.19	16.97	15.87	13.01	37.7	1670
					290	223.2	228	240.3	246.6	240.3	225.8	209.1	226.5	222.4	232	228.9	227.7	199.9	188.8	161.2	155.9	151.9	160.1	144.6	149.5	146.1	132.4	137.4	126.8	120.4	116.2	112.6	101.6	166.6	210.3	90.8	43.84	30.97	22.48	19.16	14.22	13.25	16.43	367.4
					247.7	244.2	263.9	266.1	236.9	232.1	234.6	195.6	230.5	225.5	217.8	208.8	211.3	189.5	180.4	165.6	155	153.5	150.6	143.2	144.7	141.9	135.2	130.9	125.6	120.4	115.3	108.2	104.8	130.3	212.1	123	45.49	30.33	22.28	19.02	15.74	11.41	10.93	64.09
					340.1	184.6	284.8	214.2	229.9	237.8	216.7	215.9	222.7	212.7	219.1	223.6	206.3	183.4	162.9	159.1	160.2	149.7	156.9	140.6	131.3	139.3	132.9	128.3	116.9	127.5	111.8	109	103.4	105.7	188.9	151	55.65	31.15	22.78	20.58	16.96	11.82	9.712	18.04	790.8
					316	282.3	237.1	214	230.2	216.6	207.7	238.4	229.7	219.1	228.1	199.8	207.4	176.3	172.9	160.6	141.2	136.3	147.4	134.2	141.2	137	124.7	127.1	122	122	116.7	107.3	93.87	97.19	144.2	170.9	67.02	33.85	25.11	18.96	15.77	13.52	9.853	12.29	145.3
						237.2	240.4	225.7	197.7	224.6	222.5	200.8	222.5	215	217.2	178.5	192.3	185.1	178.6	154.1	146.3	135.3	138.5	128.8	128.9	133.2	129.9	116.2	121.5	114.3	110	106.5	90.33	91.27	120.1	184.3	95.34	32.61	27.68	20.78	16.21	13.27	10.28	9.473	29.78
						243.6	203.3	225.9	227	248.4	205.9	229.3	185.3	201.3	213.1	207.7	175	176.3	158.9	148.3	137.8	134.6	128.7	128.6	126.3	132.2	129.5	124.2	114.2	113.6	109.1	108.9	92.24	94.44	92.38	167.9	122.5	41.22	27.01	18.71	15.2	13.13	7.908	10.33	12.44	337
						270.2	251.1	202.6	191.5	231.1	233	199.2	211	203.6	212.5	205	185	176	149.1	147.5	145	138.7	124.6	121.7	130.7	118.1	127.8	112.5	112.9	114.7	104.1	104	92.92	86.5	79.3	139.6	145.4	54.52	25.64	21.75	16.15	12.78	8.358	9.244	9.382	58.73
						282.8	220.4	185.6	209.8	213	236.4	206	207.8	214.5	192.7	191.1	166.4	165.5	151.5	138.9	136.4	120.9	122.5	121.4	117.4	121	110.9	109.1	112.5	110	100.2	101	85.44	88.39	77.39	109.4	157.3	68.8	29.49	21.05	18.1	13.56	9.491	6.478	7.272	16.34	745.4
						493.4	221.1	181.7	222	217.7	214.2	196.2	200.1	200.8	190.1	189	176.5	166.2	146.5	128	124	125.1	118.7	111.7	116.7	114.9	109.1	105.8	108.4	102.4	99.38	99.45	95	86.17	68.57	79.82	141.2	89.54	31.36	20.51	15.31	11.29	9.553	6.793	7.203	8.846	135.1
							209.9	196.2	202	211.2	191.1	208.1	201.9	211.1	188.7	190.5	174	149	147.3	129.4	121.9	117.9	109.2	107.4	113	112.7	104.4	107.2	101.4	105.7	105.2	94.44	92.11	79.65	68.11	68.02	122.3	114	39.57	22.92	17.96	13.06	11.34	7.078	6.668	7.157	30.38
							168.5	241.7	195.8	171.3	198.5	173.2	187.2	192.3	169.8	178.1	158.4	144	130.9	112.5	112.3	117.9	103.8	105.9	109.6	108.3	99.84	106.4	103.5	102.4	97.61	90.37	85.26	77.59	66.68	63.57	95.87	128	54.02	23.94	17.15	14.66	10.86	8.903	6.638	6.111	12.85	310
							193.4	199.1	199.1	192.4	191.3	181.7	202.6	182.2	177.8	196.5	160	141.4	131.5	116.8	107.7	106.3	102.3	90.02	104.6	111	96.01	101.4	101.1	98.23	95.76	90.92	85.53	74.51	60.81	59.17	72.68	120.7	76.54	25.31	16.22	14.34	10.3	8.534	8.113	4.095	8.906	55.14
							230	170.5	176.9	184.9	205.8	188.8	178.2	183.7	176.7	159.7	153	134.5	123.8	119.1	102	102.1	98.47	97.8	101.2	99.88	94.74	96.33	94.43	94	93.11	87.15	86.3	74.55	70.25	57.25	60.82	108.3	91.67	34.14	19.35	15.62	10.89	8.039	7.842	4.641	6.961	14.43	710.8
								181.9	191.7	182.7	200.4	175.5	196.6	164.7	170	163	158	127.9	120.8	112.2	103.9	104	95.99	95.36	95.71	97.87	92.83	93.59	94.13	95.07	89.37	87.55	85.82	75.47	68.31	54.79	48.18	86.03	100.4	43.57	18.21	13.04	8.442	7.784	6.033	4.623	6.266	7.378	131.4
								166.8	195.2	214.7	169.4	154.9	167.1	158.6	167.5	167.5	150.6	139.9	105.5	116.7	111.6	93.22	90.94	90.44	92.91	92.17	90.87	93.19	86.48	90.8	85.86	84.87	75.48	69.76	59.67	58.5	45.21	61.66	107.2	56.04	20.11	12.29	9.933	7.531	6.04	4.554	4.821	5.726	26.52
								195	180.4	180.4	156	176.7	177.2	158.2	156.6	151.5	140.5	130.4	115.8	110.3	92.83	100.3	89.3	93.72	82.88	91.68	83.95	86.07	83.21	80.86	84.55	80.03	78.71	71.72	67.24	54.03	45.32	46.05	92.85	70.66	22.74	13.58	9.186	8.007	6.223	5.395	5.439	5.383	10.84
								219.4	167.1	175.9	169.2	174.5	181.1	171.1	147.8	154.6	135.1	126.9	109.6	111.6	90.07	97.22	79.42	80.58	79.45	82.2	85.04	79.57	81.93	83.53	82.07	80.17	81.03	68.26	61.17	51.85	41.97	40.02	79.6	81.98	30.38	13.72	9.465	7.745	6.804	6.157	5.038	5.643	8.181
								230.2	165.6	171.3	146.2	181.4	166.6	172.9	141.9	159.2	132.7	121.2	101.8	94.64	88.54	86.14	71.5	78.58	79.26	82.86	81.12	80.33	85.86	78.98	83.27	74.69	77.28	69.17	59.13	53.94	43.03	35.81	59.4	89.62	41.04	14.57	12	6.997	6.379	7.179	5.657	5.276	6.778
									155.9	163.8	159.2	165.4	154.6	171.6	154.3	139.9	121.5	119.8	104.3	91.44	91.03	85.59	82.92	78.06	76.81	76.45	76.36	72.39	78.58	80.06	77.78	79.24	72.42	67.96	57.65	50.83	42.37	35.89	41.75	84.39	54.47	15.69	12.07	9.919	7.593	6.046	5.759	4.581	5.321
									148.2	152.1	144.8	163.4	150.4	145.1	144	122	136.6	112.1	104.5	77.33	83.68	77.71	78.48	69.94	72.58	74.79	72.6	76.56	74.45	71.09	71.02	78.42	72.41	65.11	59.37	44.59	40.3	32.5	35.05	66.15	70.63	23.41	11.94	8.832	6.631	7.562	5.037	6	5.787
									180.2	159.9	160	160.9	143	133	136	128.5	125.4	96.68	91.73	82.54	75.75	75.15	76.74	69.37	73.22	71.26	72.42	71.57	76.1	63.51	70.03	71.26	65.39	63.15	55.67	48.69	37.47	33.86	30.42	51.2	70.34	27.93	13.22	9.764	7.196	7.339	6.99	6.454	5.548
									192.9	173.8	132.3	170.1	138.9	138	131.4	125.8	120.4	93.52	91.41	82.94	75.5	71.16	71.77	68.54	72.92	65.9	62.9	67.54	62.58	67.07	68.94	67.96	60.12	57.51	56.41	45.32	42.02	29.28	26.72	36.97	67.97	39.89	14.53	9.739	7.752	7.998	6.977	6.731	5.654
									200.8	150.6	138.6	142.3	160.9	149	121.2	116.9	113	99.39	82.78	81.24	64.5	71.5	63.43	65.41	68.92	67.25	65.17	69.77	66.86	64.73	68.66	66.92	59.88	57.66	50.89	47.68	37.22	30.28	26.25	27.48	60.88	52.12	18.05	10.13	9.006	8.227	7.188	7.643	4.889
									404.2	164.3	140.9	132	134.4	133.5	126.1	118.6	109.2	92.28	87.64	75.24	63.93	67.38	59.83	61.7	66.01	57.37	57.99	59.28	58.02	62.46	62.91	67.86	57.29	54.84	46.4	41.53	35.41	29.09	27.44	25.84	49.33	59.72	23.65	10.62	9.035	7.339	8.162	6.033	5.328
										151.8	149.6	129.7	133.7	138.4	129.6	111.9	109.1	81.7	85.48	74.03	68.69	59.97	58.77	60.54	58.78	58.43	56.56	61.21	60.93	56.36	62.08	57.54	58.14	55.67	44.74	46.16	35.69	29.57	25.15	22.58	37.12	65.02	31.83	12.99	10.32	8.188	7.569	6.123	6.227
										163.8	141.8	132	121.7	136.1	123.3	110.1	103.4	86.76	79.61	72.05	63.35	62.23	60.63	51.16	59.49	50.66	52.8	65.01	55.95	57.5	58.84	56.81	54.24	53.63	43.72	39.54	36.26	30.58	23.87	21.7	27.32	57.62	42.48	17.02	9.72	8.658	7.756	5.868	7.58
										128.2	131.7	109	136.9	128.6	110.8	109.2	99.85	93.98	79.81	74.53	64.15	61.6	57.14	51.83	54.08	58.73	52.05	55.35	60.21	56.99	53.64	50.76	58.71	51.44	42.27	39.19	34.58	28.74	25.22	21.85	20.61	46.69	50.34	20.57	11.45	8.993	8.018	6.322	8.08
										163.6	114	111.3	115.3	123.9	92.61	103.5	99.83	97.57	74.74	67.35	62.54	58.56	55.44	54.44	52.87	52.75	47.69	53.67	56.49	48.27	51.63	49.01	52.16	42.76	37.3	40.43	30.36	27.29	22.3	19.99	18.77	37.34	52.21	23.07	11.98	7.477	8.79	6.333	7.075
										343.7	116.4	131.6	122.6	112.4	111.5	102.3	91.82	80.76	74.39	63.13	55.56	55.95	51.24	51.45	46.47	51.53	49.9	56.68	56.63	46.7	51.92	46.46	49.26	48.44	42.21	38.25	30.17	26.19	23.19	20.01	17.61	27.06	54.32	33.03	12.89	9.478	9.695	7.067	6.644
											109.8	129.9	121.1	120	94.31	92.15	88.53	77.97	63.34	63.89	60.2	48.48	48.86	45.34	43.91	49.04	50.92	45.62	49.5	44.95	48.03	47.24	43.32	46.48	41.7	37.07	33.22	25.82	23.53	20.34	17.75	21.61	49.67	46.86	15.82	11.41	8.356	7.637	6.465
											113.5	124.6	114.2	119.7	101.2	102.5	85.16	73.3	66.43	62.12	59.05	48.26	45.52	46.83	45.9	47.3	46.55	46.76	49.09	45.59	41.67	45.89	43.63	45.67	39.82	34.62	32.25	26.24	23.59	20.79	16.99	16.7	36.67	50.18	21.99	10.72	9.441	8.831	8.054
											116.8	113.1	111.4	104.8	124.3	98.94	76.72	69.31	62.04	54.6	55.07	49.23	44.1	47.36	43.6	41.13	42.01	40	43.39	43.93	44.65	42.4	43.04	36.8	40.99	33.86	31.44	26.26	25.64	19.77	16.56	15.6	26.31	49.78	31.18	10.67	8.963	10.99	6.639
											142.1	118.6	137.5	110.3	111.9	90.21	77.08	72.25	56.39	53.12	47.92	44.89	41.45	42.75	45.73	40	43.95	43.45	41.49	40.69	42.83	43.25	39.88	39.44	37.36	31.12	26.97	27.02	24.95	18.99	17.17	16.38	19.91	43.78	35.64	13.16	8.597	7.388	8.627
											306.6	121.9	109.7	99.19	97.65	94.89	77.3	68.55	62.5	58.82	45.13	49.42	41.89	41.46	41.76	42.6	39.93	40.17	41.51	37.41	42.03	42.47	41.14	41.48	39.52	31.47	27.56	26.06	20.78	18.02	16.28	16.14	16.22	33.67	40.14	16.61	11.85	7.464	9.31
												123.9	104.9	110.6	98.06	80.41	75.23	60.51	57.56	51.33	43.73	39.9	38.24	33.52	39.71	38.72	39.28	36.52	37.37	39.86	39.2	38.8	40.63	39.81	32.33	28.64	28.56	25.08	21.73	18.03	16.98	13.34	13.93	25.55	39.97	22.6	10.6	8.247	9.122
												113.1	100.2	95.37	92.66	73.58	74.65	60.55	48.62	42.29	39.91	41.41	41.67	38.85	40.17	38.8	38.13	35.57	38.77	35.8	37.17	38.5	38.11	34.68	29.78	28.14	27.47	19.92	21.78	19.55	16.51	15.52	13.32	20.59	40.88	30.05	13.24	7.149	7.404
												110	105.1	110.4	87.39	73.81	71.81	64.93	51.53	48.18	44.2	41.98	34.96	37.02	33.8	36.11	36.71	34.99	37.64	30.82	34.99	36.86	40.96	33.44	30.46	28.37	26.94	22.39	20.71	16.7	15.93	13.24	13.95	15.37	34.57	33.96	14.99	8.525	9.008
												112.7	96.53	98.95	86.31	78.15	72.28	69.73	51.44	44.6	39.05	37.61	34.71	35.78	32.73	35.48	33.76	34.64	33.12	37.41	32.15	36.58	38.7	35.9	30.39	28.26	25.72	20.53	19.17	17.23	15.37	13.28	14.82	13.79	26.63	36.58	20.11	9.326	9.277
												231.2	105.7	99.29	94.68	90.43	66.86	60.3	47.97	46.27	40.18	39.71	35.19	31.69	33.49	34.15	31.69	35.12	36.82	35.63	36.12	32.26	34.3	32.19	32.48	29.29	23.65	20.63	20.06	16.34	14.54	14.22	14.49	12.41	20.74	38.61	25.19	8.792	7.409
													91.47	108.2	87.27	77.53	62.27	50.1	52.95	42.08	36.98	35.95	34.65	31.3	31.64	31.07	31.06	32.05	29.65	31.12	35.03	32.77	34.41	30.96	29.34	26.36	22.25	21.7	18.86	15.13	14.07	15.79	12.67	13.49	18.44	31.94	25.94	11.81	8.12
													98.37	93.17	84.64	80.36	60.23	50.31	48.19	39.58	36.44	33.32	35.36	29.16	29.08	29.74	30.78	33.07	30.46	31.35	32.33	31.08	31.91	27.73	27.37	26.78	23.13	20.5	17.74	16.24	14.3	15.29	13.46	11.76	14.96	26.2	30.13	15.7	8.503
													97.12	90.86	79.01	75.94	53.51	57.53	38.96	37.93	35.13	29.44	33.63	29.27	33.41	26.04	26.02	27.53	31.51	29.73	33.81	31.36	28.8	28.42	25.54	22.65	22.09	19.71	14.57	16.6	13.99	12.89	12.73	11.39	12.98	21.1	32.98	18.46	8.662
													113.2	98.23	77.32	68.48	50.12	48.91	41.39	38.62	32.71	31.24	29.1	28.58	29.16	26.19	29.85	29.46	27.83	26.99	31.02	26.86	27.14	29.72	24.98	23.83	18.82	18.66	17.26	18.15	13.74	13.12	12.4	12.48	13.44	16.91	31.98	23.86	9.522
													164.5	91.46	81.2	67.57	59.99	40.92	39.37	29.26	30.79	30.71	29.15	27.54	23.28	25.61	24.16	28.29	26.84	26.46	29.83	28.81	29.68	24.02	26.3	22.68	20.8	17.89	16.52	13.99	14.09	13.46	12.62	11.44	13.36	13.69	26.46	27.28	13.7
													636.7	85.22	77.85	71.9	57.11	52.08	39.95	33	35.22	24.39	29.87	27.9	23.29	25.92	24.31	28.14	26.68	30.42	28.83	24.89	30.02	25.08	22.41	22.95	18.79	17.78	15.47	14.03	12.58	13.14	10.77	12.35	11.94	12.67	21.69	27.06	18.13
														88.45	81.02	55.4	52.51	41.29	40.78	33.24	28.74	30.01	24.95	25.76	21.75	24.42	25.23	25.34	24	27.79	26.49	23.6	27.15	24.45	23.29	22.18	17.23	18.42	15.16	15.36	14.2	13.18	11.95	12.63	10.66	11.07	18.49	27.15	20.89
														84.71	84.33	59.05	50.48	41.52	38.87	33.6	26.51	27.25	26.33	26.31	22.52	25.31	22.75	24.1	22.55	24.04	25.97	22.87	24.9	22.83	20.58	19.04	17.18	17.75	14.15	13.74	13.18	12.82	12.38	11.54	10.15	10.68	12.9	25.29	22.74
														73.8	70.46	66.46	53.07	36.31	30.08	28.03	29.45	24.36	22.38	22.54	17.9	21.39	19.8	23.36	21.53	24.31	19.77	22.72	21.67	20.91	20.58	19.89	18.17	17.65	13.01	12.09	12.23	11.3	12.88	10.19	9.993	10.45	10.87	23.6	26.08
														136.8	80.05	73.16	53.34	36.84	39.1	25.59	24.35	20.71	23.36	23.19	21.87	23.36	22.16	19.67	23.46	25.64	22.95	20.28	22.83	19.88	20.64	18.17	19.15	16.43	13.36	13.01	10.19	11.85	12.22	10.54	10.69	8.936	10.69	17.15	26.23
														490.4	60.97	55.25	45.88	45.26	29.14	26.63	23.12	21.84	25	23.37	20.87	19.22	20.35	24.03	17.91	21.85	21.82	22.25	21.17	22.24	20.25	19.4	16.87	13.03	11.27	11.36	11.35	10.19	10.38	11.75	10.18	8.421	10.22	12.37	24.09
														1584	55.84	57.56	45.96	35.23	30.74	29.89	23.64	20.94	19.49	23.52	22.61	20.99	20.96	20.08	17.65	21.53	19.9	22.86	19.92	20.43	18.76	17.87	17.49	15.18	11.4	11.82	10.57	12.58	10.5	9.819	9.878	9.493	8.252	10.29	22.18
															67.87	53.18	43.42	36.84	32.92	28.15	22.29	18.88	19.77	19.41	17.78	19.2	20.13	19.25	17.1	17.76	18.77	21.36	17.21	17.9	16.47	16.5	16.01	13.39	12.61	11.03	10.41	9.893	8.807	10.28	10.42	8.558	8.761	9.002	16.03
															70.42	46.12	35.5	34.77	27.11	26.93	24.93	20.74	20.91	20.51	17.54	23.21	22.13	18.92	18.31	18.99	18.06	18.91	20.67	17.87	18.64	14.93	14.42	11.19	11.98	9.832	9.556	11.36	9.77	9.801	9.186	8.074	9.176	5.808	14.12
															117.6	57.46	52.42	31.01	25.58	25.58	19.48	20.27	18.84	20.67	16.85	17.08	15.9	16.56	15.73	17.24	16.11	17.09	17.57	16.25	14.88	13.74	13.85	12.11	11.85	10.32	9.517	7.921	9.379	9.758	8.342	9.028	7.136	9.671	11.24
															410.6	52.38	46.59	26.29	25.65	25.66	20.08	17.28	19.55	15.77	18.73	16.13	15.85	15.8	13.38	18.66	16.6	16.56	16.22	15.33	14.68	13.5	12.62	12.83	10.71	10.37	9.993	9.597	8.927	9.271	8.085	7.981	8.208	6.335	8.75
															1242	56.02	41.91	29.31	26.79	25.3	18.53	19.66	17.55	14.06	16.21	15.45	16.18	14.58	14.89	15.16	18.16	16.68	17.85	16.35	14.24	12.42	12.36	10.65	9.209	11.79	10.45	9.897	8.638	6.474	8.038	7.366	7.596	6.199	7.392
																53.74	41.44	35.84	25.4	23.72	19.23	19.05	18.17	16.36	13.89	17.63	15.97	13.82	15.69	16.4	15.88	14.68	14.31	14.58	13.23	11.65	11.15	11.26	9.412	10.31	9.133	7.507	8.491	7.568	7.87	7.053	7.836	6.457	6.857
																70.08	42.13	30.63	21.94	23.67	17.49	14.98	12.93	14.68	15.23	13.81	14.66	15.33	16.46	18.04	13.57	15.62	13.77	12.24	13.09	10.15	10.74	9.402	10.1	8.626	8.516	8.742	7.56	7.81	6.669	6.326	7.219	7.124	6.002
																96.86	35.85	28.79	24.41	23.5	21.49	15.16	13.2	14.22	16.3	14.97	11.38	14.18	14.1	13.15	12.91	15.3	12.44	12.33	12.61	11.4	10.23	11.44	7.93	8.143	7.214	7.122	6.101	7.361	6.574	7.324	6.334	6.344	5.114
																323.4	38.91	31.47	22.65	18.84	15.76	16.89	15.36	14.06	12.68	12.83	12.83	11.41	12.43	14.62	13.42	11.02	11.42	13.58	13.49	12.4	10.03	9.988	8.794	8.184	6.588	7.416	7.055	7.2	6.169	7.101	6.583	6.072	5.982
																928.8	41.82	29.67	25.8	19.08	13.55	12.74	14.81	13.39	9.712	12.93	13.22	13.05	13.74	11	13.62	13.4	11.49	15.35	9.823	11.86	10.1	10.82	9.199	8.088	8.685	6.467	7.472	7.302	6.635	6.308	6.269	5.255	4.869
																2297	36.33	25.42	25.68	18.33	17.72	12	14.33	14.2	12.02	15.03	11.61	12.98	11.5	10.34	11.67	12.73	11.86	13	10.9	9.79	10.01	7.688	7.106	6.552	7.315	8.542	7.969	6.79	5.202	7.104	4.781	5.373	4.877
																	45.71	22.98	24.52	16.77	18.01	16.16	12.14	13.25	12.08	11.21	9.949	11.5	11.11	12.02	10.35	13.05	13.01	10.45	8.404	11.42	8.8	7.219	7.138	7.146	6.671	7.021	5.847	7.069	7.046	5.78	5.121	4.663	4.835
																	65.74	27.94	24.72	16.13	14.94	14.3	12.84	10.84	11.29	12.81	7.699	11.76	12.52	10.39	11.75	9.927	10.52	8.97	9.401	9.876	9.499	7.299	6.591	7.134	6.678	6.896	6.203	6.416	6.605	6.234	5.648	5.625	5.524
																	218.6	28.74	20.62	16.55	17.52	14.16	12.5	8.427	10.99	11.22	10.14	10.18	12.59	12.02	10.21	10.53	10.04	9.393	8.762	10.12	6.502	7.972	5.147	6.803	7.737	6.213	6.631	6.564	4.923	5.941	5.416	5.317	5.776
																	665.8	22.27	21.7	18.53	13.7	14.88	13.1	11.58	11.02	10.1	8.559	11.46	8.628	9.3	10.06	9.303	9.311	9.43	9.135	9.188	6.212	6.592	6.576	5.743	5.982	5.344	4.905	5.985	5.568	5.476	4.129	4.27	4.378
																		25.31	28	18.37	13.24	10.15	12.34	12.3	10.26	12.66	10.04	9.281	8.367	10.51	11.28	9.021	9.642	9.576	8.137	7.554	6.237	6.325	6.443	6.099	5.352	4.741	4.805	5.795	5.877	4.529	5.067	4.023	4.453
																		26.45	23.23	13.16	14.97	11.11	13.28	10.81	9.174	10.21	8.397	7.723	5.94	10.48	9.142	8.72	8.609	8.479	8.503	7.945	7.935	6.94	6.662	5.125	5.949	5.141	4.587	5.509	4.408	4.671	4.192	5.091	3.761
																			17.23	14.99	10.43	10.71	10.67	8.058	9.947	7.916	9.476	7.92	7.705	8.77	8.245	8.148	8.412	10.96	6.928	7.614	6.391	6.563	4.621	5.872	5.304	4.945	4.149	3.993	4.825	5.521	4.194	4.788	4.394
																			16.32	17.39	9.934	9.747	10.02	9.624	10	5.772	8.065	10.01	8.195	7.617	7.389	9.078	8.742	8.602	5.377	7.634	5.749	6.333	6.049	5.407	5.633	5.179	4.802	3.845	4.316	5.807	5.193	5.287	4.326
																			19.03	13.98	10.37	9.391	9.617	8.21	9.067	7.36	8.308	6.799	6.749	10.15	7.762	6.423	6.438	10.05	6.519	6.499	6.005	5.225	6.528	5.123	4.599	4.638	5.36	5.555	4.096	4.846	3.511	4.707	3.607
																			20.97	20.05	13.93	11.92	9.895	9.549	7.109	7.455	8.422	7.892	8.491	8.896	7.661	6.586	8.7	7.237	6.452	6.501	6.906	5.006	5.371	3.85	4.439	4.911	4.829	5.784	5.977	2.83	4.581	3.981	2.668
																			21.02	14.26	12.66	9.966	9.923	7.047	7.659	8.494	7.113	7.175	7.41	6.178	5.863	6.879	6.941	6.471	5.948	5.037	6.208	4.599	5.973	3.795	4.015	5.155	4.745	3.22	5.03	3.511	3.88	3.351	2.948
																			50.24	16.25	11.86	11.68	11.47	7.705	7.315	5.617	5.627	7.326	7.593	6.642	7.682	6.248	7.063	5.098	7.529	5.372	4.735	5.652	4.577	4.344	4.163	4.255	3.945	2.812	4	3.015	3.727	2.942	2.303
																			146.8	16.79	10.92	11.06	7.441	6.659	6.967	8.857	7.279	8.296	7.705	6.928	7.571	6.424	5.555	7.2	5.413	4.435	6.164	4.403	3.825	4.332	4.842	4.613	3.307	3.462	3.455	3.148	2.982	3.602	3.371
																			442.9	15.4	10.64	12.66	9.343	8.485	7.222	5.673	6.851	5.458	7.766	8.859	6.697	5.854	6.011	5.854	5.01	3.623	6.328	5.001	4.14	4.348	3.453	3.847	3.254	2.766	3.026	3.244	3.206	3.726	3.269
																				16.38	10.75	8.946	7.747	9.299	6.564	5.493	5.961	6.02	5.158	6.882	7.193	5.21	5.013	4.916	5.435	3.732	4.788	4.508	4.215	3.775	2.855	3.337	3.005	3.236	2.856	3.643	2.749	2.673	3.23
																				15.2	12.61	10.71	7.461	7.629	8.397	5.482	6.723	5.927	5.601	5.868	6.071	5.922	4.994	4.843	5.854	5.097	4.053	4.586	3.418	3.393	2.76	3.215	3.427	3.173	1.846	2.121	2.459	2.496	2.598
																				49.93	9.572	8.882	7.507	7.576	8.226	4.956	5.545	5.846	4.839	5.731	4.598	5.949	5.998	5.937	5.03	6.033	5.35	3.135	4.003	3.575	3.452	3.357	3.564	3.377	2.302	2.744	2.603	2.634	2.684
																				128.5	7.75	8.39	6.984	7.157	5.829	5.256	5.749	6.264	4.562	3.998	3.512	3.746	6.137	3.647	4.104	4.622	3.597	4.529	3.877	3.497	3.586	3.083	3.043	2.108	3.312	2.377	2.1	2.28	1.949
																				358.7	12.45	8.419	8.188	7.229	5.883	6.219	6.137	5.471	6.059	5.603	4.69	5.374	5.436	4.539	4.301	2.53	3.586	3.785	2.816	2.378	2.976	3.438	2.7	2.89	3.322	2.651	2.261	2.171	3.272
																					15.03	9.005	6.688	7.013	6.114	6.383	5.5	4.52	5.053	4.997	5.005	5.873	5.522	4.481	4.037	3.602	2.555	3.927	2.659	2.728	3.308	3.618	2.953	2.463	2.851	2.874	2.515	3.135	2.467
																					18.21	10.75	6.142	7.509	5.829	5.056	5.874	4.301	5.059	5.951	4.067	6.11	3.794	3.183	4.344	4.915	3.429	3.507	3.019	1.883	2.212	2.924	3.57	2.514	3.166	2.767	2.215	2.775	1.66
																					35.73	9.314	7.681	7.704	5.837	6.062	4.591	5.469	6.035	5.79	4.331	4.993	3.551	4.462	4.166	4.362	4.119	2.303	3.21	2.39	2.754	3.172	2.406	2.503	1.85	2.932	2.445	1.883	1.808
																					109.9	8.436	6.347	5.342	4.998	6.523	7.463	4.622	4.378	4.995	3.534	3.82	3.858	3.268	3.626	4.768	3.753	2.191	2.495	2.571	2.77	3.332	2.626	2.314	2.318	2.458	2.802	1.979	2.24
																					310.5	8.412	6.45	8.484	6.079	6.405	5.162	5.504	5.211	3.837	3.469	3.066	3.886	3.88	3.019	4.098	2.927	2.923	2.203	3.49	2.18	2.076	2.168	2.352	3.275	1.952	2.334	2.858	1.725
[truncated: 1 more columns]
