# Supplementary material for: Utilization and transformation of Chrysotila dentata-derived dissolved organic matter by phycosphere bacteria Marinobacter hydrocarbonoclasticus and Bacillus firmus
Source: PeerJ. 2024 Jan 4;12:e16552. doi: 10.7717/peerj.16552 (PMC10771764; doi:10.7717/peerj.16552)
Supplement: Supplemental Information 3 [file peerj-12-16552-s003.xlsx]

## Sheet: Sheet1
74.55	55.65	182.7	213
84.06	92.7	79.27	268	360.8
51.38	61.19	59.98	488.1	229.7
121.2	48.89	57.25	333.9	346
77.09	22.22	63.34	333.4	540	368.1
79.94	127.1	131.7	151.7	602.8	353.5
54.42	52.17	79.7	87.63	497	477.3
113.6	38.07	64.15	104.1	345.9	704.2	326.3
76.48	54.22	134.3	183	328.5	758.5	387.2
250.6	135.2	96.47	84.4	115.5	841.4	651.7	412.3
51.82	149.2	72.23	114.1	164.2	489.6	832.3	263.5
181.2	138.3	126.2	151	76.22	275.5	932.9	392.2	919.4
43.32	106.6	158.3	149	136.2	201.9	757	616.7	284.3
138.7	43.66	101	141.2	87.52	98.91	423.2	795.7	255.1
123.2	123.7	106.6	141.9	98.92	142.2	279.9	945.7	450.2	518.1
266.9	192.4	89.73	75.64	150	115.8	127.9	792.1	774.8	256.3
141.6	109.3	82.95	141.2	110.2	93.82	97.41	543	950.6	317
314.5	200.8	80.04	124.2	156.8	114.8	83.57	266	1029	417.1	273
155.2	227.5	191.9	93.22	149.1	111.9	75.98	159.7	705.9	868.3	233.3
85.22	250.5	134	96.13	147.5	112.8	92.06	86.59	446.2	1233	333.7	553.7
132.1	202.2	210.4	173.2	164.6	125.3	84.21	77.91	219.2	1166	577.5	222.3
209.9	214.7	217.6	175	187.5	185.9	82.96	65.39	112.5	887.4	1004	201.8	1250
324.3	101.2	199.8	307.9	209.8	131.6	120	88.72	79.12	478.1	1269	362.8	341.1
195.9	174	225.9	332	252.4	228	111.1	81.65	67.48	247.8	1215	667.8	191.3
284.6	230.8	200.8	364.6	383	293.8	164.3	89.29	75.81	123.3	939.4	1089	230.4	653.7
229.1	320.3	198.1	230.1	379.3	350.4	143.4	76.21	48.64	113.7	567.8	1423	394.9	271.2
161.4	182.3	225.6	362.9	385.9	389.6	194.7	80.75	72.72	93.14	286.2	1444	784.3	246.3
185.2	242.3	210.6	323.2	388.9	586.5	204.2	104.5	78.07	90.01	162.5	1079	1226	227.3	422.1
293.3	174.1	301.5	355.4	756.8	473	204.2	102.6	63.07	98.43	116.1	596.1	1652	449.8	292.1
113.5	134.1	230.4	451.9	683.4	549.4	312.8	99.42	103.8	92.64	119.2	353.5	1553	825.1	267.8
109.4	162.3	227.9	448.1	802.6	543.6	342.5	143.8	103	72.29	126.5	231.7	1187	1320	370.5	376.6
223.7	229.6	223.6	389.2	875.6	756.7	372.2	140.3	120.3	88.06	132.4	156.9	738.7	1830	577.4	361
235.7	417.5	251.4	440.7	799.9	760.8	389.8	178.1	150	114.6	143.5	164.4	472.1	1841	1016	349.3	509.9
226.7	297.7	233.8	393.7	705.1	753.8	452.3	179.1	136.7	143.5	156.7	179.8	302.4	1419	1528	403.4	338.2
139	186.1	254.8	779.2	722.9	738.2	419	237.5	159.6	167.9	192.8	203.9	247.6	934.6	1914	613.8	311
137.3	296.6	225.5	557.8	725.1	583.6	504	274.6	170.1	188	170.3	200.9	248.2	598.8	2020	1024	356.1	300.9
158.6	338.3	348.9	494.5	758.8	813.9	449.2	307.2	157.6	171.6	174.2	240	258.8	421	1567	1541	394	271.6
125.7	223.1	290.7	500.4	845.2	905.6	556	304.9	185.5	152.3	209.8	242.3	276.3	369.8	1086	1976	569.6	260.3	317.8
250.2	222.6	175.1	343.9	722.6	689.8	623.2	319.3	158.9	194.3	259.9	272.2	292.1	385.5	715.8	2041	928.7	295.3	223.1
202.3	168.3	256.5	355.5	604	891.2	540.4	334.5	200.9	222.6	258.4	292.8	334.1	403.5	563.6	1697	1463	338.3	198.7
124.3	119.4	280.5	328.7	832.1	750.2	545.1	363.6	227.2	276.7	294.1	345.8	374.3	441.2	546.7	1171	1874	497.1	210	195.4
145.1	200.2	283.2	455.1	985.6	794.5	555	404.7	241.5	270.5	349.3	357.2	471.7	492	573.9	820.3	1915	820.6	241.8	159.5
170	205.4	207.5	665.3	1038	835.9	597	359.2	265.4	272.6	337.7	481.2	545.8	626.3	653.6	694.6	1678	1267	298.6	163.6
143	156.7	258.6	718.2	925.1	860.6	604.3	419.1	330.4	360.2	396.8	497.5	549.1	701.8	710.6	708.1	1185	1687	420	170.8	144.1
238	102.1	281.2	631.6	1118	862.1	605.9	388.8	385.1	371.6	417.6	575.2	671.8	737.4	807.3	753.7	849	1794	717.2	185.3	135.1
92.88	181.5	186	746.6	1361	1045	676.7	435.9	399.1	415	471.8	578.8	761.5	800.3	845.9	820	729.9	1527	1111	230.3	132.2	126.1
188.3	136.4	269.3	804.7	1612	1190	777.8	443.8	416.1	467.9	511.4	645.7	752.3	885.6	910.2	858.1	743.2	1141	1465	344.1	129.1	109.4	543.5
201.3	114.1	340.9	865.7	1791	1143	775.1	478.3	406.2	429.1	513.8	701.5	817.6	897.4	990	936.8	765.5	826	1544	558.1	147.9	107.4	152.7
202	151.9	305.1	740.7	1653	1186	690.3	518.4	417.5	445	523.2	690.8	881.2	949.9	1038	956.7	792.4	686.1	1316	889.3	180.2	107.3	99.87
99.86	125.3	317.2	808.3	1717	1223	859.6	516.5	429.4	477.7	665.3	740.9	862.1	953.9	986.9	982.7	808.9	623.1	992.7	1172	264.1	104.6	82.62	220.2
239	105.8	287.1	701.5	1751	1288	770	493.9	427	462.2	606.8	748.3	925.8	929.4	1027	972.4	805.7	645.2	713.9	1230	440.8	113.8	82.85	92.62
204.2	164.8	163.5	815.5	1598	1210	743.3	518.4	430.9	465.1	581.2	757.4	904.9	1019	1047	999.5	849	641.9	520.8	1091	713	140.9	85.24	71.65	382.9
118.8	104.1	142.4	1024	1428	1166	767.5	463.1	513.7	511	620.1	694.5	854.8	1043	1038	1036	849.7	646.6	480.4	802.3	955.2	183.3	98.28	81.43	123
269.9	196.7	225.7	860	1491	1171	712	529	491	452.1	568.4	697.2	909.4	1068	1096	1019	837.2	688.4	484.8	524.2	1046	366.4	100.7	85.69	77.57	754.4
113.5	167.6	188.8	632.3	1462	1170	781.5	528.8	437.4	503.6	534.8	761.4	914.9	984.7	974	995.1	852.3	645.4	469.5	390.2	916.6	593.7	124.8	97.71	85.35	172.3
91.9	138	173.3	872.1	1550	1013	675.4	483.9	486.7	480.1	541.2	737.4	851.1	985.9	949.6	983.2	835.2	675.8	448.8	344	681.9	826.1	195.3	104.9	93.68	102.1	1351
214.1	171.5	276.5	824.5	1157	1014	657	481.9	462.3	440.6	547.1	674	837.4	920.7	988.9	968.7	819.2	625.6	481	322	429.1	915.2	318.8	122.3	105.6	91.8	286.1
154.6	119.2	181.8	760.8	1291	948	685.7	589	452.1	455	554.6	639.8	826.1	930.6	970.1	920.8	793.3	646	484.7	324.8	315.8	861.1	525.6	143	107.9	92.77	106.7
74.41	84.15	229.4	701.8	1016	1113	731.8	519.7	433.7	430.8	554.2	673.8	784.1	918.3	882.8	904.3	757.2	626.5	494.2	327.7	262.9	636.1	750.2	191.1	119.8	101.1	83.45	472.8
116.4	70.07	163.5	659.3	1230	1004	714.6	493.7	434.7	432	494.7	584.5	730.7	855.1	887.3	822.3	715.1	653.6	464	349.5	246.1	437.3	860.3	300.8	131.6	109.4	87.79	129.1
87.8	112.9	246.8	504.1	1135	846	621.4	423.6	413.4	420.8	496.6	633.7	714.6	842.1	873.7	847.9	729.7	599.6	464.8	332.5	262	295.9	814.5	470.3	147.6	124.2	94.45	83.47	927.6
68.78	169.1	223.3	428	1027	866	691.9	543	400.6	431.8	465.9	591.5	709.4	794.7	856.4	864.3	707.3	607.7	453.5	352.5	270.2	252.5	614.7	678.1	206.9	129.8	109.7	83.06	196.5
72.31	206	182.2	395.6	1063	800.5	595.8	476.6	426.7	422.9	509.8	597.7	641.8	738.3	829.8	787.4	690.8	590.5	482.6	344.8	264.5	228.6	450.2	789	282.9	149.1	110.1	80.79	82.75
71.85	137.7	150.4	398.8	864	812.4	639.6	465.1	438.4	433.7	452.8	578.3	629.5	766.3	766.5	752.4	673.2	599.3	481.1	353	267.6	244.2	316.9	751.7	447.6	155.3	117.1	90.11	64.31	352.8
98.91	92.11	83.8	374.5	724.1	734.6	587.6	470.3	402.8	397.2	442.9	490.8	583.6	724.9	739.5	713.1	635	570	455.1	339.2	280.1	253.9	268.2	623.8	633.7	204.1	129.2	88.95	66.28	94.27
86.46	44.22	179.7	372.7	767.9	781	636.7	425.8	394	406.3	425.9	505.2	596.2	679.1	739	737.1	610.9	547.8	448.1	354.6	288.1	251.4	260.9	461.4	732.3	280.5	137.4	95.33	73.3	59.47
100.6	77.2	151.8	294.7	634.4	658.7	594.2	432.9	355.8	353.5	414.3	492.9	574	645.4	644.1	708	599.9	541.9	448.8	370.1	293.1	270.9	262.8	339.7	722.9	411.1	142.6	94.97	72.55	51.63	153.3
115.4	120.8	120.6	424.1	604.1	646.2	571.5	498.7	363.3	357.6	397.8	441.7	526.8	654.3	651	643.2	583.3	522.2	453.6	359.1	310.8	267.7	274.6	291.5	586.6	557.6	171.5	111	75.96	52.88	67.9
93.59	84.47	178.2	383	665.4	609.4	538.2	449.7	363.2	373.8	386.2	431.6	517.6	576.8	599.6	615.5	548.3	523.7	458	365.4	311.5	290	269.5	273.3	436.8	665.6	243.1	116.1	90.32	61.03	48.14	323.9
19.13	9.866	194.6	358.2	704.8	728.8	544.9	448.6	373.5	362.3	364.2	453.7	498.5	560.4	626.6	623.2	555.8	511	451	336.7	307	275.2	281.6	263.7	348.4	680.3	359.8	127.1	89.93	64.41	54.74	85.35
64.68	67.79	137.9	376.6	582.7	597.5	483.5	486.8	358.5	338.4	372.1	506.2	494	565.8	623.3	632.4	573	512.8	426.2	347.3	308.9	288.7	280	276.4	281.4	587.5	483.3	154.1	101.6	71.49	58.39	57.52	715.4
72.13	69.08	106.1	379.3	714.4	639.4	561.7	372.4	374.9	365.9	388.5	430.1	484.8	539.4	574.3	569.1	548.7	501	412.9	373.6	298.8	302.4	295.9	272.5	271.9	440.4	578.7	224.2	105	79.63	67.31	46.22	154.9
93.99	204.1	90.67	383	571.4	487.8	538.1	397.1	338.5	348	371.1	391.4	464.1	549.1	573.2	564.5	521.4	476.4	408.1	370.5	306.2	284.8	284	280.2	264.6	330.7	600.9	309.3	112.5	89.2	70.44	48.55	62.71
134.1	133.2	137.7	410.8	555.8	631.5	492	404.1	368.4	334.7	369.9	401.7	439.4	498.7	539.9	519.3	497.3	468.5	401	336.2	319.1	289.3	281.6	287.1	267.9	280	546.7	431.4	140.4	90.08	75.61	64.51	58.77	313.7
79.93	113.1	171.6	266.1	539.5	559.2	489.1	427.3	323.8	360.1	362.2	386.5	458.1	486.9	522.5	493.8	479.4	471.2	397.3	342.8	307.7	287	302.4	287.4	274.5	251.4	446.7	533.9	185.9	106.3	83.45	66.63	51.57	86.47
85.31	102.6	67.84	342.6	514.2	575.9	405.6	392.9	373.8	339.4	331.2	337.9	407.4	504.7	492.7	506.3	492.9	451.1	399.6	346	306.5	308.1	306.9	281.6	266.4	264.2	333.2	570.5	269.9	113.6	88.1	75.99	58.45	57.11	673.6
84.24	59.34	76.5	315	513.1	561.3	506.6	423.5	345.4	338.2	359.9	376.5	438.3	459.5	470	476.1	485	426.8	398.2	342.1	306.5	302.8	301.8	295.8	289.5	271.7	268	505	366.4	138.7	107.2	82.35	71.96	48.93	151.2
169	105.9	111.1	245.9	473.6	601.7	472.8	434.1	326.1	301.3	333.4	371.1	420	445.1	465.8	458.3	465.4	422.2	403.3	337	332	312.4	295.6	283	273.6	261.5	252	415.1	474.2	180.2	114.1	92.55	81.76	57.76	66.2
95.78	94.67	159.4	390.5	418.8	498.1	495	371.1	314.5	363.7	326.8	336.7	399.2	446.3	472.1	472.3	447.1	429.4	394.1	338.3	334.3	304	309.7	293.3	290	260.1	245.1	326	518.7	254	125	111.7	90.32	65.23	50.67	269.5
300.1	75	151.4	273.3	393.8	458.9	526.9	397.3	340.1	350.9	353	363.2	377.9	411.2	447.8	464.1	441.4	429.2	404.9	331.5	318.9	298.4	289.9	303.7	291.4	273.7	242.5	283.6	476.1	351.1	155.4	109.8	96.74	81.78	54.69	76.69
606.1	94.3	129.4	240.3	428.4	481.3	474.7	388.6	359.6	335.8	335.2	377	424.8	405.2	419.4	415.3	442.2	413.9	394.2	332.5	309.8	298.8	304.9	298.5	283	274.7	252.7	245.9	414.4	439.1	188.9	126.2	110.6	90.47	60.46	48.87	589
1376	17.68	102.2	300	424.1	584.6	438.8	374.3	351.7	318	318.2	354.5	373.5	398.1	409.7	450.1	421	422.3	376.7	329.2	293.9	285.7	298	309.9	292.5	288	253	247.4	327.8	495.7	249.6	154.4	121.8	96.59	72.26	54.23	127.3
2285	69.3	150.2	273.6	449.8	632.3	534.5	397.9	338.6	305.6	363.6	387.7	390.8	417.7	430.8	439.7	413.2	428.2	398.2	338	315.6	298.7	306.9	297.3	309.6	281.8	268.6	250.1	274.6	479.9	324.1	165.6	128.3	102.9	69.19	53.83	52.36
3343	77.03	121.1	334.3	465.6	621.3	493.1	407.8	288.4	370.3	350.8	390.7	402.4	381	389.6	431.8	401.7	409.1	375.5	349.3	315.1	308.4	294.4	296.7	306	285.5	272.8	252.6	243.1	406.9	409.3	189.6	139	108.7	87.75	60.86	45.87	246.5
	214.7	103.4	306	501.3	467.3	363.4	367	346.8	341.3	357.7	352.3	387.4	377.3	427.3	431.5	385.9	395.2	388.8	341.6	315.1	284	306	292.7	288.4	285.9	283.7	258.3	238.4	329.3	451	237.7	151.7	119	86.77	61.97	42.94	62.86
	517.2	137.5	317.8	434.9	454.9	402.3	307.6	340	303.4	367.4	339	378.2	376.2	394.7	406.5	415.1	406.1	362.7	341.2	305.2	281.1	293.3	288.4	277.2	283.9	279.3	263	252.1	290.1	461.3	306.9	168.3	131.8	94.85	64.61	45.08	40.96	512.5
	1572	144	342.8	275.9	377.3	450.6	394	372.3	294	353.4	355.7	368.8	392.4	363.3	389.8	398.8	407.9	364.2	334.5	299.9	273.9	289.2	282.2	290.7	291.6	286.4	267.2	256.8	254.9	417.3	385.8	194.3	144.4	106.1	71.66	50.3	33.29	102.9
		136.2	205.6	416.4	446.2	558.3	394.2	379.6	366.4	349.4	316.8	350	357.6	398.4	432	394	392.2	377.4	326.8	290.6	278.6	284.6	285.7	305	292.9	293.6	281.3	257.5	248.8	347.8	442.5	241.5	142.1	103.1	78.11	54.98	29.59	39.23
		254.8	247.6	400.8	494.5	530.1	387	359.5	321.3	343.4	325.5	354.3	396.3	396.8	338	400.4	380.8	357.3	330.5	301.8	281.1	287.6	282.2	287.6	279.8	281.2	273.5	262.6	256.9	286.5	448.8	286.5	162.6	115.5	81.9	55.9	37.38	32.57	190.8
			259.7	473	486.8	435.1	418.4	353.4	337	315.9	368.6	348.2	380	408.1	387.5	408.5	410.8	355.3	322.3	288	285.3	267.9	271.3	283.7	293.2	289.7	284.2	259.7	264.7	262.3	408.6	355.7	179.1	117.1	91.34	58.96	37.05	28.02	50.76
			239.2	521	407.6	432.6	437.5	387.9	353.3	324.8	324	326.9	368.4	386.8	396.8	399.4	386.6	365.7	325.5	281.2	275.9	272.5	274.8	276.2	280.2	278.7	280.4	274.3	258.6	249.4	343.5	407.1	217.6	121.9	96.99	61.81	41.4	30.91	30.49	428.5
			232.5	459.2	513.9	461.5	400.3	354.9	343.6	337.5	330.3	342.4	385.7	410.2	405	391.7	369.9	357.9	308.4	285.4	279.9	266.8	277.8	275	274.2	280	279.3	263	259.9	247.3	287.5	430.2	254	139.6	97.49	64.71	49.69	30.62	25.8	85.54
			195.9	413.9	458.2	419.3	373.3	377.7	330.2	375.2	333.9	351.8	368.4	384.2	431.1	394.2	353.8	350.5	315.6	264.6	269.2	260.1	266.5	264.1	275	283.5	289.4	264.3	261.8	240.7	258.4	400.9	299.8	150.9	98.44	65.45	45.08	30.98	25.72	32.18
			383.8	396.2	445.1	444.9	438.5	396.7	304.4	358.8	344.6	354.5	399.4	384.5	383.3	376.9	375	362.6	310.7	265.5	254.3	264.7	256.6	260.2	277.9	278.4	269.9	264.8	257.4	259.4	248.5	335	348.2	178.2	104.3	74.57	52.28	34.58	26.27	22.11	193
				409.1	435.3	457.9	409.7	324.8	365.4	341.3	328.1	343.2	359.1	357.8	380.3	368.2	358.8	348	286.4	263	235.8	247.6	244.2	258	276.6	261.6	276.4	276.4	263.5	250	250.1	289.1	373.3	213.6	107.7	72.3	53.22	37.73	24.54	20.49	46.16
				544.5	347.9	518.4	393.4	330.6	331.1	340.4	322.5	323.4	352.9	357.3	394.3	384	373.4	321.7	306.4	252	241.9	241.2	243	256.2	263.4	260.5	265.2	259.6	260.4	261.4	236.9	244.5	368.1	251.2	113.9	77.02	52.99	38.75	26.94	23.12	23.86	393.2
				380.9	406.4	413.3	365.8	373.9	333.7	348.2	302	347.8	378.6	334	385.1	382.5	346.8	329.7	292.6	233.8	238.7	233.1	240.8	247.6	259.2	270.3	263.3	259.2	261.6	251.3	237.1	226.8	312.7	302.7	127.2	80.25	55.72	39.48	28.7	21.42	15.58	75.86
				337.6	450.4	375.3	374.1	342.6	365.8	320.9	325.9	341.3	370.8	376.1	367.8	393.7	350.5	311.9	275.9	251	231.3	235.1	225.3	237.2	240.1	263.2	267	259.7	254.1	240.5	236.1	218.6	269.2	319.4	160.4	87.04	61.84	39.07	29.97	21.98	15.65	23.8	827.8
				430.8	428.5	428.9	359.8	328.3	318.6	342.7	303.4	313.5	366.7	368.2	381.5	387	334.7	308.6	265.4	247.6	226.1	220.8	225.9	215.6	246.1	250.6	261.2	245.6	249.5	255.3	236.6	211.5	228.9	313.6	201.7	88.03	63.31	40.85	30.97	23.88	16.34	16.39	156.3
					552.7	359.8	385.3	330.2	319.1	325.9	340.2	366.5	360.5	356.1	364.9	393.5	325.9	305.1	270.2	240.8	213.1	222.3	223.5	232	236.9	258.8	245.4	257.4	257	244.1	238	214.2	213.1	284	240.9	100.7	60.36	44.4	28.76	23.27	19.18	13.91	36.26
					386.3	345	351	338.3	334.9	343.1	347.3	326.2	354.4	379.3	377.5	364.4	311.6	273.3	235.9	230.2	206.3	197	208	213.5	227.6	238	241	250.9	258.6	235.4	232.5	220.3	203.4	232.4	261.7	127	67.39	44.77	33.31	27.11	18.66	14.43	16.12	380.7
					430.8	393.5	348.3	316.7	382.9	352.3	293.6	345.6	359.9	381.5	389	353.4	309.8	290.7	265.5	211.3	210.9	211.9	204.9	211.5	223.2	225.9	244.6	236.7	240.7	234.3	230	213.5	190.8	198.3	266.3	153.6	65.82	43.71	31.33	27.07	18.98	14.89	13.55	69.21
					327.6	332	338.4	325.3	322.3	345.7	308.8	351.7	329.8	372.7	373.5	372.4	289.2	276	251.9	215.6	200.7	192.5	206.9	210.2	218.1	218.2	235.9	227.1	232	239.1	221.2	213	188.9	174	231.6	192.1	79.2	50.84	36.52	25.39	20.37	14.91	11.96	21.09	741.8
					602.3	400	377.3	333.2	306.7	313.8	313.3	344.4	332.4	344.1	362.3	331.8	312.3	268.8	247.4	207.6	192.6	199.9	195.8	206.3	220.1	220	222.3	223.6	222.7	225.8	215.9	206.7	187.4	162.9	198.2	218.8	94.61	53.01	40.01	30.44	21.19	17.36	12.93	12.75	138.9
						313.1	362	364	327.8	341	322.8	345.6	349.6	379.5	363.8	320.6	298.3	250.2	227.2	205.6	195.9	194.2	188.6	202	198.8	220.5	223.6	216.6	231.4	219.9	209.9	212.6	184.3	158	166	225.1	122.1	56.75	37.67	29.77	18.47	15.88	11.96	11.3	30.02
						331.3	409.3	347.1	325.9	321.9	305.6	298	353.3	336.6	352.3	356.4	294.5	258.2	240.7	191.7	184.8	177.3	191.2	197	189	209.1	217.4	210.9	215.8	215.5	212.5	195.4	175	150.9	145.8	209.3	147.9	58.22	41.95	29.04	20.67	17.08	11.57	12.05	14.14	315.5
						388.8	378.1	301.8	339.3	280.6	300	297.3	325.8	347.8	353.4	333.7	289.8	255.4	218.9	201.2	173.6	176.2	182.1	183.8	187.1	209.6	211.3	224.6	209.1	217.5	205.8	197.6	165.5	158.9	124.7	176.4	168.9	71.21	42.88	28.21	21.07	16.49	11.44	10.67	9.851	55.75
							322.3	296.9	328.3	281.8	312.7	296.1	311.9	336	345.4	321.7	300.5	250.3	215	183.7	170.6	163.7	178.1	174.3	179.1	194.6	203.6	206.5	202.4	204.3	200.3	195.7	170.7	153.4	124.3	143.9	185.5	87.83	46.56	31	21.91	14.91	11.42	10.67	9.559	17.43	694.1
							329.5	311.1	310.1	295.2	283.7	262.5	320.8	344.7	339.7	316	285.3	246.1	199.9	177.5	170	158.2	172.6	178.1	176.9	189	189.4	200.5	198.5	195.1	196.3	179.2	176.8	150.6	123.8	124.3	172.7	113.2	51.81	29.91	21.54	15.27	14.6	12	8.634	10.9	130
							313.2	306.8	310.6	292.7	273.7	294	309.9	307	329.6	284	260.8	229	193.1	174	164.3	149.9	158.5	161.6	176.1	173.5	184	187.8	202.5	191.4	185.5	170.2	164.7	143.1	124.7	96.61	147.5	135.6	60.24	30.96	20.3	17.22	12.9	11.67	8.148	7.835	28.14
							338.1	289.7	291.8	299.8	287.4	305.3	290.8	313.5	336	291.8	255.4	241.1	192.1	169.4	163.9	151.8	149.2	160.5	161.1	169.1	175.4	183.6	194.3	187.4	179.2	178.4	157.3	144.6	119.7	93.94	121.3	145	72.56	28.96	22.83	18.44	12.69	11.67	9.977	8.424	10.67	282.4
							386.2	291.5	312.1	285.6	255.9	319	286	319.9	290.9	275.4	248.8	215.1	179.5	161.1	158	141.3	146.1	153.2	153.9	163.8	171.3	178.7	183.5	183.4	176.6	171.7	154.9	141.2	115	90.12	96.86	142.3	86.43	37	21.95	17.31	13.59	10.07	8.061	7.814	9.442	50.9
								297.6	275.2	261.5	251	285.3	266	306.6	302.7	284.3	244.7	211.7	184.7	161.9	134	137.3	146.1	149.8	156.2	161.9	166.9	172.5	175.8	177.9	177.9	163.8	156.2	132.4	113.2	95.03	82.39	129.1	107.1	45.91	21.29	21.48	13.51	10.13	8.417	6.048	8.192	15.59	641.7
								271.9	276.9	263.3	255.8	256.4	255	275.5	316.3	253.6	232.9	201.9	182.4	159.9	142.2	133.3	139	147.4	152	150	167.9	163.3	170.4	157.7	165.6	167.6	151	137.9	110.1	90.03	81.68	101.9	128.2	51.49	23.29	18	13.54	12.45	9	6.398	7.227	8.036	122.6
								293.2	294.1	269	262.5	270.1	272.4	299	292.8	266	239.8	197.2	155.2	146.1	146.4	131.4	134.2	137.9	139.6	145.9	156.6	154.6	162.8	161.2	168.1	155.9	139.7	126.9	112.6	84.47	72.84	85.84	124.7	67.6	23.4	21.05	14.35	10.29	9.419	6.499	6.458	6.954	25.56
								305.7	261.3	251.4	230.8	241.3	272.1	292.9	306.4	270.7	222.8	192.4	166.2	134	129.3	124.2	132.6	130.4	131.6	139.6	146.6	146.4	154.2	158.1	164.3	149.2	141.8	124.6	107.6	90.2	67.62	65.19	111.3	80.94	30.74	19.76	14.34	11.07	7.755	7.724	5.574	5.563	9.815
								287.5	264.1	242.6	237.3	235.5	235.9	269.4	291.9	234.1	213.4	171.9	166.9	135.1	127.2	116.6	122	128.4	117.4	132.3	135.9	148.3	137.9	149.8	154.9	142	128.8	123	103.6	86.07	70.4	53.63	94.61	95.28	38.61	18.78	13.66	12.24	9.109	8.049	6.272	6.051	5.921
								302.1	248.9	244.7	240.9	233.9	229.7	232	257.6	226	224.6	165	150.3	135.8	105.4	112.4	121.2	115.3	115.7	138.1	127.6	139.7	140.2	144.3	147.9	131.9	131.9	118.8	98.3	85.07	68.23	54.9	74.22	108	47.57	19.64	14.39	12.07	9.867	7.051	5.086	6.001	6.434
									277.9	210.5	227.8	214.9	219.6	220.2	253.3	216.7	199.6	147.1	142.2	136.7	119.9	102.1	110.1	116.1	115.1	125.9	123	135.3	140.1	146.1	137	131.3	122.9	117	96.74	77.45	64.31	54.48	57.17	97.62	67.13	22.06	14.31	12.76	9.683	6.958	7.023	4.84	7.532
									277.9	220.2	219.6	205.5	213.5	233.8	268.6	237.9	190.8	162.7	137.7	122.5	113.4	106.1	103.4	104.5	113.7	111.9	114.7	125.6	124	134.6	127.3	128.4	120.3	106.6	91.86	72.61	64.32	53.69	47.55	80.34	80.25	29.21	14.87	12.29	11.5	6.737	6.039	5.462	5.491
									232.3	206.6	214.6	196.6	204.1	230.1	231.2	221.8	197.5	159.6	136.5	116.3	103.5	90.84	105.2	105.2	102	110.7	111.4	109.1	119.9	122.2	126.3	125.6	124.8	103.2	90.78	74.48	62.46	50.95	43.21	65.3	85.3	34.4	15.84	12.38	9.414	8.312	7.419	6.256	4.943
									248.1	207.3	198.7	199.3	200.6	205.9	191.5	224.2	190.2	163.4	118.1	110.4	100.2	87.4	96.03	103.9	102.9	108.5	114.7	112.3	118.4	119.6	121.8	116.2	113.1	101.5	88.63	73.41	53.13	44.91	41.17	51.61	83.45	45.54	17.76	12.85	9.827	7.849	7.672	6.686	5.337
									287.6	221.3	215.9	209.8	204.8	202.3	219.4	198.4	147.1	152.4	121.8	121.4	98.16	86.31	84.27	93.48	106.5	102.1	109.1	109.8	113	118.8	114.9	112	108	97.78	87.26	67.5	57.03	45.34	40.03	41.59	72.27	58.22	22.54	14.11	9.26	8.608	7.786	7.263	6.162
										203.1	197.8	192.2	234.4	195.5	220.2	195.4	134.5	131.3	115.4	101.7	94.32	83.21	92.75	87.39	85.55	100.9	104.1	104.1	108.5	110.8	106.3	104	110.6	92.48	73.46	65.12	51.79	42.39	36.62	37.06	62.84	64.62	28.64	14.46	10	8.891	7.825	7.497	5.999
										213.7	197.9	200.6	184.6	207.5	195.1	176.8	148.3	131.8	114.6	100.2	89.01	85.12	92.07	83.53	86.66	80.61	86.12	101.8	97.17	106.8	105.8	103.7	104.2	87.77	85.03	63.91	51.45	43.02	35.95	33.25	46.7	69.28	35.95	14.65	9.782	10.78	7.788	7.992	5.987
										217.2	190.4	197.4	198.6	206	198.4	171.5	160.2	119.8	100.5	91.83	81.66	81.59	80.82	72.65	76.19	78.37	94.74	97.85	101.8	97.17	98.53	97.28	94.38	87	77.07	62.36	55.85	42.14	31.76	29.14	36.5	63.26	44.71	16.41	12.55	8.177	8.007	7.032	6.934
										202.8	186.8	215	186.8	196.6	171.1	162.6	147.8	115.8	102.4	82.92	74.79	78.26	77.04	75.98	79.01	79.79	85.12	91	96.12	93.89	98.27	97.62	93.07	89	71.92	67.16	52.12	40.82	31.83	28.38	29.39	54.35	55.04	23.08	12.09	9.762	8.278	7.383	6.937
										207.9	199.5	179.6	190.9	191	175.3	156.6	140.1	113.2	107	87.79	74.28	71.47	77.72	68.16	79.12	76.42	84.02	80.68	84.08	90.29	87.49	91.02	81.9	83.02	71.34	59.37	50.21	40.75	31.56	29.86	25.65	40.1	59.47	27.6	12.81	10.6	8.864	8.105	5.801
										353.6	186.9	166	172	171.9	191.1	168	127.7	113.3	93.32	71.49	72.51	69.26	67.7	64.85	72.57	76.37	76.32	76.6	83.7	85.38	85.87	85.76	80.36	78.71	72.28	58.26	41.23	38.6	32.06	24.93	25.6	30.37	60.76	36.85	12.39	9.689	9.821	7.145	7.026
											155.8	168.7	185.1	192	179.6	171.4	126.6	108.9	92.49	73.01	67.1	65.8	69.81	68.35	70.95	67.11	74.9	82.59	80.03	83.95	81.06	79.49	76.91	73.07	60.53	53.38	47.6	38.35	32.79	28.44	22.64	25.16	46.63	42.07	15	9.388	8.518	7.573	7.668
											174.5	141.3	174.3	161.6	170.5	154.9	122.1	100.6	87.05	71.11	66.01	57.59	66.82	60.32	64.05	63.18	73.19	75.7	74.38	80.15	80.34	78.58	75.83	66.47	56.17	51.45	47.13	37.15	34.74	27.5	24.97	22.62	39.34	47.07	22.95	10.46	7.655	8.148	6.494
											158.5	177.4	162.7	169.5	168.4	137.9	132.6	98.09	77.2	72.87	57.82	60.91	57.25	59.35	64.18	63.96	70.72	72.15	74.35	82.16	61.84	76.9	74.4	66.51	57.16	52.93	41.72	38.57	30.25	25.75	22.65	22.22	28.65	49.44	31.98	12.28	9.151	8.412	7.055
											174.1	173.4	145.3	154.3	156.4	144.2	112.9	100.3	84.27	72.41	58.19	62.73	57.09	56.23	55.52	60.81	65.01	66.46	72.34	65.63	69.26	76.11	68.98	68.03	56.03	48.13	41.52	31.52	31.03	27.04	20.14	19.28	22.26	49.11	35.76	15.75	10.83	8.35	5.553
											308.8	151.6	156.5	162.5	167.8	137.7	117.8	90.54	89.4	67.87	58.73	54.38	52.66	56.26	48.79	56.11	54.25	61.23	65.93	68.46	70.81	67.85	67.9	61.55	52.9	46.74	37.79	34.29	28.77	26.84	20.11	18.95	19.79	38.4	40.24	18.83	10.1	8.996	6.497
												171	137.7	148.1	146.6	128.3	111.8	88.92	81.58	65.57	56.37	58.16	52.41	51.56	49.76	57.85	54.04	59.2	62.06	64.13	62.29	58.19	62.19	58.54	54.48	48.27	38.19	35.74	27.94	24.78	21.65	17.74	18.93	28.97	48.97	24.47	10.02	7.595	8.575
												162.9	163.1	144.4	150.1	120.9	99.28	80.68	74.26	60.06	58.03	52.68	54.04	47.44	54.28	52.8	58.99	58.85	59.25	63.45	62.43	58.56	66.89	59.69	54.38	43.64	38.12	31.01	29.76	22.54	21.27	17.22	18.29	22.46	44.68	30	12.64	9.017	9.311
												175.4	143.5	147.7	137.2	118.2	106.8	80.18	67.21	54.87	54.47	46.18	47.5	48.38	53.73	50.42	52.23	56.01	55.78	60.69	49.75	58.36	63.46	50.02	49.21	38.76	36.29	29.51	26.16	24.75	19.49	17.64	15.81	18.19	39.04	34.79	15.11	9.343	8.725
												180.9	133.9	158.8	136.5	114.4	94.89	82.53	65.74	55	46.14	46.25	45.76	45.17	44.14	42.69	48.36	45.54	48.77	56.39	58.68	58.4	59	50.23	46.63	40.74	34.95	29.49	24.28	23.61	20.51	18.05	16.23	16.23	31.92	40.18	19.06	9.522	7.872
												268.2	127.2	151.7	115.8	120.8	94.25	74.53	59.05	57.93	40.3	42.13	47.73	43.54	42.63	43.76	42.96	48.38	51.41	50.57	57.49	53.69	55.41	45.95	42.17	39.07	30.69	28.89	25.35	22.75	20.28	17.9	15.35	16.06	24.52	41.28	24.55	10.99	8.566
													131.1	124.9	126	108.5	89.15	71.02	65.94	55.38	45.1	43.25	41.54	43.38	40.88	48.8	46.42	46.71	47.69	47.63	52.43	51.64	51.75	44.18	38.01	37.87	30.04	28.33	21.38	20.51	19.6	15.89	14.93	15.18	17.6	36.44	27.85	12.92	6.761
													143.2	120.5	118.9	105.3	85.96	64.94	58.95	51.27	47.05	44.86	37.79	41.74	43.49	41.88	46.62	49.88	41.93	46.66	52.29	46.3	49.05	39.35	42.12	32.77	34.88	26.45	24.43	23.75	19.29	15.61	14.41	14.46	16.45	30.49	34.65	16.21	8.17
													144	111.3	109.7	107.7	83.9	68.9	48.05	44.91	50.55	45.15	36.84	35.85	35.81	37.85	40.36	42.46	43.98	48.15	49.91	45.1	44.09	41.96	39.12	33.91	30.04	24.74	22.21	20.99	18.62	16.76	15.33	14.04	13.51	22.54	33.33	21.63	8.34
													131.8	120.3	101	92.6	75.67	68.1	44.98	36.83	42.66	41.1	39.35	36.11	34.73	38.56	38.81	40.19	43.11	44.36	44.99	42.39	38.61	40.13	36.14	31.34	25.99	24.08	21.96	19.94	19.24	18.41	13.08	13.87	10.62	15.64	34.01	22.15	9.733
													184.5	120.6	110	88.47	74.37	58.97	47.2	40.08	40.6	35.03	33.49	33.68	32.73	31.79	33.39	36.93	38.46	34.35	43.73	44.63	40.2	39.1	36.08	30.38	24.63	22.79	21.92	20.94	17.57	17.49	14.18	14.85	13.15	14.55	26.02	27.8	15.3
														129.7	111.1	89.94	83.76	58.59	52.08	48.22	38.53	34.9	32.86	29.4	28.63	35.14	35.05	35.79	36.94	37.22	37.9	39.65	38.84	36.22	36.65	30.07	23.06	20.35	20.75	17.58	16.65	15.95	13.37	13.75	11.82	10.62	22.27	29.15	16.5
														130.2	116.9	91.39	74.36	57.4	57.47	38.93	36.27	33.08	32.86	34.42	34.59	30.09	35.24	34.32	34.69	38.24	37.83	39.92	37.21	35.44	31.23	25.94	24.44	20.24	19.24	16.04	17.15	14.72	13.59	12.23	12.2	10.29	18.79	28.76	19.3
														115.6	103.9	79.42	68.46	51.47	45.88	37.47	31.93	26.66	28.36	30.32	33.1	31.75	34.1	33.6	36.35	35.67	35.71	34.71	35.66	32.57	28.04	30.54	23.13	19.96	18.47	15.3	14.97	16.71	11.9	9.858	10.65	9.781	13.01	23.42	23.36
														114.4	99.75	84.19	65.75	50.98	41.94	36.29	30.28	28.79	29.03	29.4	28.24	32.67	31.64	34.27	29.5	34.84	34.5	32.37	32	29.8	29.11	25.56	21.39	19.16	15.28	15.81	13.34	13.69	13.11	11.26	12.33	9.825	11.2	22.79	27.66
														196	101.9	78.08	67.6	53.1	43.38	31.87	31.13	30.95	31.86	27.49	30.38	27.57	32.78	32.32	32.48	33.64	31.22	33.81	34.25	28.38	27.35	24.81	19.97	18.34	17.03	15.96	13.86	12.92	12.7	10.77	10.82	10.49	9.694	17.85	25.9
															91.68	68.86	54.2	47.84	39.33	30.95	26.25	28.91	28.13	25.33	28.79	29.71	29.75	27.58	30.75	27.08	30.53	31.26	29.83	29.53	25.23	22.45	19.82	18.82	14.82	14.51	12.87	12	12.23	10.72	11.24	10.61	8.109	13.05	24.98
															85.13	71.62	54.48	42.91	38.16	31.22	28.54	27.62	26	25.69	28.5	28.86	26.85	26.68	29.91	29.99	29.96	30.88	27.66	27	24.1	22.56	21.18	16.09	15.14	14.18	11.65	12.72	12.14	10.51	11.41	7.408	9.593	10.28	23.12
															96.71	73.74	60.83	42.31	31.5	30.56	23.8	25.35	21.43	22.92	25.24	23.98	26.24	27.61	25.44	28.92	31.83	27.99	26.05	29.51	22.44	23.28	20.54	17	15.49	11.73	13.82	12.59	11.53	10.96	9.748	8.829	8.215	8.838	16.5
															91.38	65.36	54.44	42.23	33.74	27.41	27.35	25.97	22.46	19.48	21.92	23.8	26.17	26.14	25.31	26.13	26.02	25.14	25.49	22.06	21.8	21.55	17.83	14.01	12.29	13.01	11.98	10.41	10.51	10.31	10.04	8.459	9.767	9.52	12.52
															158.1	70.57	44.96	40.06	33	28.25	27.39	26.65	24.84	20.1	24.15	20.4	24	22.74	21.16	25.46	24.91	23.24	25.1	21.74	20.9	19.37	18.01	14.4	15.33	11.51	11.86	11.38	9.882	8.589	8.784	8.871	7.858	7.973	10.16
															445.6	81.9	54.24	38.12	33.06	26.72	24.61	21.89	22.36	19.95	22.15	22.56	18.69	22.52	20.6	21.66	21.68	25.39	23.13	21.15	21.74	20.44	16.45	13.21	13.59	11.72	11.55	11.36	9.826	7.837	9.548	10.38	8.867	6.541	8.232
																65.33	50.61	41.26	28.67	29	27.08	19.76	22.88	19.68	25.03	22.22	18.88	19.68	24.01	22.61	20.12	22.66	21.86	22.11	20.23	17.45	14.44	14.43	10.89	12.27	12.31	9.799	9.752	8.549	7.498	7.819	7.476	7.507	6.395
																	48.5	40.25	30.11	19.92	21.82	19.78	20.72	20.39	19.56	18.87	22.51	20.75	17.43	20.01	19.59	23.46	21.66	22.06	23.39	16.14	14.76	13.44	13.02	10.78	11.24	9.512	10.4	8.332	7.384	7.866	7.897	6.467	5.884
																	48.77	35.39	26.01	23.53	23.92	21.6	19.53	17.13	16.88	18.97	17.91	20	23.25	20.13	20.69	21.13	21.49	20.99	16.56	16.28	13.72	13.79	11.37	11.06	10.4	9.565	11.21	6.806	7.496	7.614	6.851	6.286	8.198
																	46.76	41.54	28.48	21.96	19.37	18.08	19.32	18.62	16.97	18.96	15.25	18.85	20.06	20.24	18.46	19.44	18.95	17.5	16.78	15.77	14.28	12.54	10.9	13.03	8.47	8.987	8.574	8.027	6.797	6.133	7.333	5.955	6.701
																	50.01	33.01	25.9	23.36	18.45	17.93	15.3	17.75	17.21	18.02	15.88	16.76	17.96	15.81	18.15	18.22	15.85	14.59	14.12	15.49	12.68	10.4	9.413	10.43	9.301	8.926	9.397	7.302	7.689	6.65	6.113	5.765	5.863
																	49.85	33.59	23.74	25.49	22.95	16.97	15.7	19.89	16.73	15.29	15.67	18.25	18.49	18.84	15.79	17.11	15.4	17.03	13.73	11.59	11.68	11.56	9.386	9.139	7.732	7.826	7.979	8.241	6.552	6.401	6.978	4.88	5.721
																	43.27	33.78	23.58	20.68	16.36	17.51	17.2	15.64	18.03	16.76	16.58	16.4	17.23	16.15	13.57	17.21	15.83	17.34	13.55	12.78	12.78	10.88	9.133	9.567	7.616	7.584	7.939	6.265	6.916	6.13	4.744	5.731	4.485
																	40.32	29.33	22.73	21.48	16.36	19.13	13.25	17.48	13.91	12.75	15.13	16.76	16.28	15.81	14.22	15.2	15.84	15.47	13.52	11.93	12.56	11.44	8.634	10.4	6.793	7.038	6.013	7.688	7.215	5.424	7.128	7.361	5.088
																	80.64	29.2	27.77	23.78	15.85	12.61	15.98	13.25	15.58	16.6	12.5	13.15	14.45	13.38	14.51	16.23	13.1	13.79	12.72	11.59	11.46	9.075	7.986	6.94	7.895	7.872	6.979	6.445	6.115	5.656	5.275	4.989	5.69
																	235.2	32.84	28.24	21.56	19.01	15.39	14.8	12.97	14.79	16.28	14.44	14.24	14.62	14.64	14.88	13.04	14.54	14.24	13.42	11.28	10.08	7.714	8.704	5.747	8.25	6.674	6.619	6.353	5.044	6.226	4.386	6.747	4.242
																		33.89	23.97	17.41	13.47	13.22	12.86	14.34	11.83	13.57	15.09	14.74	11.7	13.12	12.19	10.43	12.52	14.88	13.09	10.32	9.769	8.024	7.976	7.046	6.988	8.114	6.216	6.672	5.465	4.754	4.776	4.165	5.201
																		31.64	24.64	19.05	14.49	13.89	10.62	12.5	9.454	12.66	12.63	12.69	11.3	14.33	14.01	12.26	11.68	14.49	11.08	10.89	10.46	7.897	8.13	7.216	5.935	6.644	6.577	6.111	6.241	5.767	4.568	4.864	4.226
																		38.39	17.82	17.84	15.94	11.65	10.3	12.07	9.511	11.37	12.78	13.76	10.89	11	12.96	12.91	11.31	10.22	10.41	9.244	10.06	7.68	7.558	6.578	5.424	6.733	7.157	5.95	5.67	4.824	4.602	3.534	3.046
																		57.41	18.3	17.83	18.33	11.56	9.914	11.2	9.088	8.794	10.92	11.61	13.18	10.6	11.84	11.94	10.68	9.698	9.147	9.132	8.523	6.955	7.164	6.237	4.583	5.633	5.297	5.059	5.331	3.408	4.917	4.3	4.195
																		168.1	17.65	14.02	14.47	12.71	11.59	11.8	8.536	11.6	11.71	11.22	10.39	10.98	9.369	10.99	10.19	9.436	10.48	7.654	7.331	8.108	7.121	6.852	6.035	6.541	5.435	4.72	3.869	6.745	4.096	4.255	3.835
																		510.9	22.29	12.41	13.6	9.96	10.21	11.56	11.5	8.824	9.099	10.52	7.124	10.75	9.912	9.573	9.819	9.062	9.701	8.628	7.557	5.713	5.662	5.928	6.741	4.615	5.056	4.306	4.433	4.944	4.025	4.011	2.402
																			21.89	12.02	13.02	13.73	12.14	9.891	10.16	9.867	10.82	9.725	9.924	8.658	11.19	8.416	10.87	10.07	8.794	7.315	6.976	5.228	6.816	5.512	4.792	4.392	3.908	4.325	4.984	5.849	3.741	3.534	2.726
																			23.02	13.57	13.97	12.65	10.46	11.3	8.263	9.328	10.73	10.14	10.35	8.081	6.602	9.506	9.468	9.493	9.292	7.012	6.588	5.648	5.597	5.453	4.136	4.327	4.228	4.205	4.726	4.685	3.209	4.032	3.481
																			47.9	15.03	16.49	10.47	9.498	8.186	10.97	9.248	9.499	7.809	10.4	9.499	8.588	8.256	8.072	8.941	8.379	6.937	5.624	7.613	6.244	4.777	4.441	5.424	4.634	4.324	4.844	3.919	3.523	3.04	3.097
																			157	13.38	14.57	11.14	12.17	8.612	9.014	9.544	9.365	7.049	8.34	6.222	9.685	8.401	7.431	9.088	6.291	7.278	6.457	5.295	4.962	4.47	5.41	4.577	4.77	4.344	4.106	5.161	3.529	3.268	3.229
																			400.9	16.88	12.26	11.47	10.17	7.776	7.665	7.919	9.295	7.038	8.362	8.077	7.708	8.867	7.275	6.171	6.762	5.395	5.286	5.749	4.893	5.149	5.006	3.629	4.791	4.25	3.546	3.507	2.228	3.603	3.413
																				15.8	11.1	9.884	7.911	7.594	7.944	8.707	8.982	8.355	7.029	6.024	7.295	7.408	7.016	7.267	5.922	4.701	5.087	4.784	4.875	5.527	3.983	4.542	3.421	3.121	3.813	3.172	2.891	2.712	3.006
																				17.86	13.24	9.913	10.49	9.874	8.851	6.144	8.5	7.879	8.934	7.542	6.846	7.465	6.957	5.975	6.486	4.834	5.329	5.811	4.754	4.177	4.976	4.841	2.712	2.674	3.021	3.549	2.126	2.599	2.668
																				40.2	12.69	10.83	9.602	8.588	7.388	7.041	7.054	8.589	8.233	6.132	6.505	8.894	5.459	5.635	6.07	4.088	6.044	4.428	5.236	3.567	4.473	5.042	4.166	4.049	3.194	2.299	2.542	2.752	2.305
																				120.7	10.67	7.049	8.795	8.194	7.527	8.609	6.642	6.888	5.412	5.894	6.449	6.403	6.011	5.678	5.748	6.011	5.569	4.953	4.417	4.557	3.991	3.518	3.126	2.854	3.624	3.957	2.701	3.063	1.999
																					14.85	11.39	10	7.211	7.932	6.506	5.137	8.42	7.435	7.338	6.536	6.682	6.522	5.174	5.409	5.801	5.272	5.011	3.847	3.647	3.692	3.252	2.837	2.813	2.361	2.388	2.294	1.673	2.576
																					14.96	7.8	8.318	8.471	6.226	8.17	6.589	6.958	7.084	6.807	6.667	7.141	5.826	5.036	5.723	4.296	3.652	3.803	3.613	3.655	2.212	2.471	3.294	2.848	3.431	2.312	2.941	2.248	2.892
																					17.93	8.26	9.391	7.471	5.967	6.455	6.255	5.318	5.237	4.828	4.737	6.144	5.667	4.791	6.722	4.891	3.062	3.711	3.409	3.425	3.083	2.243	2.954	2.49	2.18	2.636	2.92	1.719	2.377
																					36.02	8.211	8.009	7.046	6.813	6.591	5.528	4.886	4.829	3.917	4.753	6.188	5.691	4.653	5.616	5.695	3.958	3.356	3.138	2.917	2.888	3.56	2.763	2.729	3.02	3.219	3.168	2.414	2.241
																					105.8	9.761	8.169	6.038	7.038	5.28	5.616	4.27	5.234	4.029	3.743	4.636	5.583	6.041	3.633	4.304	3.933	3.134	3.708	3.125	3.435	2.976	2.632	2.014	3.731	3.057	2.421	2.119	1.629
																					298.2	11.23	8.079	6.427	6.884	7.476	5.055	5.228	5.667	3.754	3.624	5.716	5.184	4.67	4.062	3.329	3.725	3.471	3.539	2.542	3.563	2.437	2.656	2.149	1.762	2.472	2.487	1.863	1.92
[truncated: 1 more columns]
