# Supplementary material for: Utilization and transformation of Chrysotila dentata-derived dissolved organic matter by phycosphere bacteria Marinobacter hydrocarbonoclasticus and Bacillus firmus
Source: PeerJ. 2024 Jan 4;12:e16552. doi: 10.7717/peerj.16552 (PMC10771764; doi:10.7717/peerj.16552)
Supplement: Supplemental Information 4 [file peerj-12-16552-s004.xlsx]

## Sheet: Sheet1
55.61	63.57	108.8	132.6
73.05	126.2	148.2	282.1	409.7
48.28	39.97	33.81	249.6	222.2
86.13	32.6	51.38	332.4	199.9
104.3	87.31	158.7	252.4	495	415.3
83.65	69.9	100.4	215.8	683.5	262
140.5	38.21	76.98	135.8	640	424.6	743.6
124.8	58.28	40.66	135.5	396.5	580.3	285.2
48.92	153.5	128.7	195.2	186.6	745.9	366.1
-2.591	132.5	133.9	207.6	226.6	749.8	729.1	459.4
182.9	59.01	186.3	147.6	132.1	558.1	830.6	265.7
78.46	107.7	144.6	231.7	136.5	241.3	942.8	385.3
66.75	78.7	203.4	106.4	113.4	175.2	694.1	637.7	297.9
86.21	32.64	263.5	129.5	138.5	80.71	449.1	909.5	290.2
73.11	101.6	165.8	145.7	92.29	68.47	268.3	1049	418.3	500.4
112.3	55.25	128.2	239.6	80.44	123.8	171.1	806.6	766.4	235.6
143.7	45.81	160.1	97.79	101.4	81.18	120.6	462.2	993.9	280.8
165.8	207	173.6	116.7	148.1	186.9	125.9	191.6	1144	444.7	305
243.8	165.2	120.4	179.1	81.42	57.48	122.4	106.1	782.9	859	198.5
364.9	153.1	244.1	121.6	113.1	173.2	68.34	82.98	517.5	1185	289.8
171.6	188.5	147.4	168	147.2	111.8	131.7	86.27	261.6	1166	550.7	222.9
177.8	295.9	155.9	279.1	180.6	126.4	106.6	64.28	148.7	899.5	978.1	206
162	258.8	189.4	124.1	177.5	104.2	100	83.6	85.72	554.3	1318	330	344.5
136.1	162.6	124.5	176.3	257.3	156.3	150.1	75.77	65.98	242.5	1320	669	200.1
224.9	251.9	191.3	279.2	409.5	272.8	103.1	43.53	78.23	141.7	978.5	1115	219.3	665.3
228.5	134	184.7	267.4	326.4	286.6	136	87.96	47.76	83.53	564.3	1420	326.3	261.5
318.9	110.3	215.7	354	411.2	409.6	171	79.35	65.72	72.2	246.3	1450	759.1	225.5
345.3	191.2	216.4	291.5	469.5	471.4	236.2	78.66	95.52	83.08	164.5	1128	1250	282.2	435.2
172.1	219.5	275.5	510.3	812.8	464.9	224.7	129	80.08	82.89	119.7	641.1	1659	473.8	293.8
127	207.2	220.1	407.6	589.2	581.1	233.7	121.3	84.32	61.04	120.3	374.4	1623	847.6	269	790.3
231.5	107.9	251.8	601.4	706.4	629.3	350.6	141	116.9	95.37	130	218.8	1242	1406	377.8	409.2
276.5	206.4	231.8	494.5	798.8	643.3	351.9	215.5	112.6	139	132	193.3	789.9	1838	577	327.7	1583
238	302.4	236.4	393.8	781.9	747.3	404.8	196.7	112.6	130.2	134	180.5	468.3	1835	960.2	356.5	485.7
284	255.6	270.4	525.9	819.4	674.7	405.1	211	141.1	129.6	159.2	198	327.3	1421	1518	419.2	371.3
300.9	302.3	276.8	398.6	902.3	754.6	437.9	283.7	140	191	151	233.2	277.1	932.4	2052	587.7	345.7	722.1
169.1	222.2	225.7	475.8	767.8	789.6	599.8	271.9	180.7	153.5	155.2	210.3	276.7	590.2	2056	959.4	348.1	329.7
138.3	136.5	309	513.7	783.1	726.5	585.3	315.9	168.3	190.2	180.7	220.6	283.5	430	1608	1572	410.7	270.7
298.8	114.7	237.5	466	944.9	734	609.9	290.3	221.4	181	237	243.2	345.7	390.9	1089	1998	606.4	297.8	342.4
202.6	228.3	246.2	465.1	770.6	694.5	534.9	315.2	196.6	217	225.9	278.6	334.4	426.2	718.3	2074	992.5	310.9	243.7
219.8	168.6	222.2	472.6	818	787.3	605.6	325.2	217.7	220.5	264	294.2	355.1	440.6	588	1692	1493	361.5	238	446.9
227.7	166.1	222.7	400	784.7	693.8	614.2	357.1	247.9	258.2	271.9	364.3	394.1	484.5	599.8	1193	1911	525.7	223.4	203.1
249.4	153.5	238.7	495.9	757.1	732.8	542.7	385	258.8	263.4	329.5	419.2	479.8	525.9	593	822.2	2051	882	259.8	169.4
176	88.69	207.3	597.9	839.1	818.6	570.3	357.4	273.7	276.4	346.2	408.1	563.8	635.4	660.1	754	1659	1318	304.8	190.8	214.5
135.4	73.3	224.5	504.6	889.1	848.5	669.3	420.8	299.5	329.8	343.9	502.4	618.3	660.4	730.2	752	1200	1718	448.1	186	149.7
151.7	194.4	259.7	599.7	1055	1019	713.7	469.4	295.1	381.3	430.2	517.1	671.1	754.8	746.2	763.1	864	1792	719.9	200.1	128.6	307.3
172	244.7	178.2	607.3	1261	949.6	659.2	472.6	344.9	355.5	507.7	579.5	684	804.5	821.2	809.5	742.2	1604	1114	228.7	137.8	124.3
171.5	196.5	345.7	626.8	1253	1077	798.7	462.6	341.6	431.5	493.2	575.4	760.1	883.5	902.9	881.7	730.2	1118	1440	353.3	141.8	106.1	575.1
149.3	202.3	200.6	766.3	1383	1126	693.8	497.6	427.3	416.4	523	658.8	771	895.4	892.5	846.7	765.8	868.4	1593	572.1	164.3	104	159.9
209.8	117.2	402.7	719.2	1517	1123	749.3	524.4	415	421.1	574.1	679.4	780.6	922.1	951.3	960.6	799.9	693.5	1352	912.2	186.7	115.9	98.66	1101
206.2	137.1	315.9	647	1362	1126	841.6	515.8	422	453.5	540.6	739.8	878.3	960.5	992.9	960.2	781.5	628.6	1007	1197	250.6	110.3	75.71	236.8
88.13	50.94	206.3	604.4	1395	1202	763.7	580.7	423.5	436.6	615.4	730.5	856.6	924.4	986.4	940.8	805	670.3	692.2	1296	450.2	119.3	82.35	108.3
174.5	256.8	200.4	677.2	1414	1170	736.4	529.2	430.2	443.4	563.2	757.8	850.8	1008	1037	1010	840.5	679.8	573.8	1091	727.2	143.2	96.93	73.06	404.9
103.6	148.8	289.5	596	1432	1207	876.1	489	466	497.2	578	735.4	906.4	970.5	1031	1045	853.7	698.9	490.3	796.1	993.3	202.2	95.44	80.99	116.6
147.7	61.56	179.2	613	1407	1124	758.8	615.2	444.4	466.1	626.4	752.2	912.3	1007	1054	1027	818.7	720	508.6	518.2	1056	356.7	99.63	87.79	83.73	804.6
166	93.03	176.5	779.8	1468	1175	780.8	522.4	429.1	442.2	592.2	733.2	882.6	1039	1007	1000	842.4	708.8	476.1	408.3	962.6	581.8	124.1	86.31	84.34	192.4
146.4	174.1	175.7	563.3	1293	1159	799.8	526.5	454.6	457.4	510.2	697.7	889.8	1003	1019	971.9	815.8	680.9	514	346.5	699.7	841.8	194	101.8	84.09	103.2	1490
112.5	149.4	110.5	662	1238	988.3	745	488	449.9	417.8	532	684.6	858.2	942.1	995.4	979.4	840	665.3	534	347	453.8	929.1	322.6	111.9	103.7	91.59	319.2
81.43	214.5	324.9	596.3	1201	1094	652.2	522.6	455.9	402.2	509.7	676.4	821.5	879.5	956.4	915.7	789.7	672.5	491.9	330	340.6	838.3	536.2	136.6	102.2	87.52	120.3
136.3	170.8	177.4	672.9	1060	1041	707.8	553.1	478.8	442.6	518.1	646.8	803.5	863	954	905.7	816.7	650.8	484.5	369	268.4	646.4	773.4	199	122.2	109.1	95.71	527.8
95.49	90.25	122.2	700.6	975.2	1208	716.8	524	445.4	411.1	524.9	644.5	772.8	856.1	879.8	868.6	788	677	492.3	355.2	293.2	436.7	849.1	314.8	138.4	113.1	95.59	142.5
60.28	85.27	224.7	497.1	1117	971.5	793.2	516.6	425.8	393.4	479.9	643.3	701.2	896.7	938.7	838	790.2	682.4	546.5	363.7	280.2	304.6	791.8	483.8	165	133.5	100.2	90.88	971
86.81	82.92	237.1	521.3	1076	831.3	624.3	572.4	400.6	429.7	504	606.9	675.2	797.8	858.2	847.9	707.2	657.7	519	368.8	289.6	262.3	618	668.5	211.1	130.3	107.4	76.53	208.9
65.83	96.37	220.9	422.3	932.7	877.7	585.4	534.2	392.7	397.3	495.7	580.8	644.4	776.2	825.8	851.2	717.6	640	506.2	359.2	278.8	242.3	475.2	791.9	296.8	141.4	119.8	87.29	89.6	1830
158	81.39	198.8	364.5	876.8	776.4	664.4	478	444.8	405.4	419.1	559.7	646.9	759.5	800.5	798.7	672.1	631.5	534.5	383.9	300.4	261.2	344.1	764.1	471.5	162.8	133.6	93.87	68.89	375.5
128.9	53.37	176.2	450.3	897.7	765.8	657.5	433.3	467.4	424.8	415.6	549.6	598.8	724.2	774.3	781.8	663.8	615.7	524.2	383	317.1	258.4	286.6	657.4	646.3	210.1	128.6	105.2	56.83	104.3
160.8	194.5	106.7	535.3	644	840.3	570.5	512.7	400.8	408	449.8	491.9	607.3	696.3	754.1	742.7	696.1	619	501.7	376.3	312.7	272.6	264.4	484.6	743.3	289.5	152.2	105.4	72.87	64.41	862.1
119	218.8	143.3	430.5	753.4	846.6	731.8	501.4	356.5	375.8	415.1	521.7	602.5	677.2	679.3	711.3	654.9	563	517.2	367.3	322.9	284.5	267.4	359.4	755.4	420.5	173.7	113.3	79.24	61.95	181.3
35.03	181.2	127.9	404.6	820.5	717.4	588.1	494	387.8	380.7	429.4	492.5	591.8	635	687.6	735.7	651	549.9	482.9	384.6	313	291.5	275.5	290.6	640.9	593.4	188.4	121.6	84.39	66.16	75.57
108.4	64.96	146.7	399.1	651.6	770.8	548.5	476.2	404	374.5	391.1	481.6	577.2	598.4	625.7	690.9	652.8	548.2	478.4	368.6	323.8	309.2	275.4	276.3	477	687.6	251	123.6	96.71	67.34	58.5	352.8
95.42	147.8	80.87	350.5	672.8	732.6	560.6	428.2	462	392.8	408	449.2	541.4	605.8	611.6	685.7	616.4	521.1	473	401.2	334.5	308.3	294.3	290.7	361.4	706	359.9	143.2	100	80.25	60.11	94.69
105.8	98.72	146.3	247.4	671.1	644	552.1	401.1	365	389.9	376.4	428.8	527.2	591.6	648.6	643.8	587	547.4	483.1	373.1	327	304	298.1	280.3	316.2	620.8	509.2	170.4	113.9	80.68	55.47	56.5	796.4
55.9	33.5	149.5	315.4	591.1	694.4	558.3	418.3	397.6	374.7	392.7	401.6	522	583.8	605	608.8	584.3	561.1	456.7	391.8	328.5	306.8	307	295.7	294.5	482.6	624	231	120.3	86.61	62.2	54.03	169.1
36.68	85.15	103.8	246.2	589.8	602.6	571.2	444	390.1	362	392.1	424.2	526.3	587.3	540.1	611.1	552.9	539	456.1	383.5	328.2	322.2	313.8	315.2	290.6	375.6	650.5	330.4	129.5	93.13	80.95	61.6	73.42
104.8	101.7	48.23	153.4	434	568.7	517.7	480.7	366.6	334.6	395.5	396.5	503.3	519.1	547.5	577.2	574.6	506.3	452.4	392.6	343.6	322.8	322.4	307.9	283.4	319.6	583.8	442.9	156.8	100.9	86.18	74.87	60.31	348.2
124.4	130.2	111.3	351.4	540.3	543.8	532.5	461.5	397.4	351.2	338.3	433.1	449.5	518.6	530.8	571	512.7	494.2	434	379.7	342	337.3	314.2	315.2	297	292.1	462.6	552	207.3	109.9	97.65	80.72	62.05	101.3
63.29	69.82	72.01	399.5	400.7	533.5	456.8	444	325.3	363	367.2	437.9	421.1	526.4	517.9	558	524.6	481.6	442.4	373.1	347.9	317.4	324.9	318.1	312.7	290.8	354.1	584	297.4	134.9	104.5	91.86	70.98	62.81	736.3
118.5	40.06	162	304.7	410.6	617.8	476.7	467.9	338.4	374.7	375.4	398.4	447.6	548.6	522.9	518.2	517.7	462.2	446.5	381.1	353.4	317.1	316.4	319.9	313.3	292.7	311.4	544.6	403.1	150.6	112.2	93.69	75.56	65.28	158.7
173.1	41.88	183.8	215	428.6	580.6	531.7	456.7	400.5	423.6	376.7	414.7	438.1	524.5	484.5	537.3	512.1	469.4	461.7	393.5	338.4	333.4	337.9	331.8	311.8	300.8	273.8	449.9	512.5	197.8	123.7	105.6	79.31	61.28	74.4	1514
142.7	92.21	97.22	316.7	564.2	458.9	542.4	410.6	405.7	332.9	369.2	366.2	449	464.5	459.1	496.7	484.9	464.6	413.1	395.8	336	327.2	314.7	333.3	312.5	297.2	261.8	350.2	540.5	270.5	138.9	119.2	89.68	71.28	54.95	302.2
240.7	129.1	102.6	272.2	435.7	506.3	568.4	424.1	421.3	334.5	357.8	353.3	449.7	456.4	505.6	510.7	470.9	474.2	424	396.5	346.4	336.7	323.2	321.3	311.2	305.9	283.1	293.9	514.3	358.5	162.2	131.1	104.1	69.78	64.73	86.13
847.5	237.9	87.67	319.1	484.4	529.8	508.5	390.2	400.6	357.8	396.4	429.5	416.9	467.1	460.8	462.2	483.5	471	423.9	370	340.3	327.6	327.3	324.1	327.8	307.8	288.3	280.7	431.9	456.1	206.4	142.5	116.6	92.58	66.67	54.98	640.7
1234	88.84	137.4	255.9	460.4	613.9	519.3	436.8	371.9	377.2	376.5	388.6	394.6	461.8	478.5	468.8	462	456.7	436.1	380.6	349.3	336.3	326.9	334.4	308.1	308.4	288.6	264.8	362.7	507.3	258.5	148.4	129.6	103.9	75.51	52.06	136.4
1803	111.1	141.2	315.2	554.6	572.2	533.6	417.8	394.4	370.4	335.4	372.7	419	440.1	455.4	486	443.9	478.2	438.6	373.1	342.5	317.2	319.7	320.2	310.5	302.1	293.2	278.3	306.7	487.8	345.4	165.5	140.5	110.5	85.15	56.97	52.87
2961	60.12	100.2	278	393.4	514.5	508.5	465.5	365.5	367.4	330	383.3	419.4	400.5	423.9	458.1	447.2	470.8	406.2	358.7	357.6	315.7	332.5	330.6	318.7	309.7	304.1	281.3	273.8	435.5	429.3	194.2	146.2	121.8	86.25	62.1	43.23	266.2
3695	292.3	156.5	163.4	568.6	658.4	457.6	482.8	358.8	360.9	351.5	358	414.8	430.5	432.8	444.5	461.3	423	418.7	365.3	327.9	313.3	323.4	321.2	326.1	311.3	309.6	283.8	266.3	362.8	479.6	261.1	160.7	129.6	91.28	63.68	45.39	71.46
	749.6	77.18	337.6	580.8	524.6	440.3	420	375.3	366.5	347.4	355.1	428.4	423.7	431.7	393.4	460.2	436.9	383.4	382.1	330	323.5	317.7	340.3	323.1	325.6	305.2	294.2	269.9	307.4	472.3	311.9	173.5	141.5	99.95	72.02	48.43	42.58	574.2	9974
	1509	131	272.1	531.5	524.7	485.6	427	331.6	376.7	371	371.9	407.4	400.4	410	419.7	432.7	451.5	405.8	364.8	328.3	313.9	309.4	325.7	315.8	323.6	303.3	298.7	272	279.6	442.5	408.3	198.2	149.2	108.5	78.52	48	37.83	110.6	4272
	2363	173	334.7	467.3	443.1	561.3	398.8	394.6	376.5	344.4	397.8	402.4	418.6	429.2	441.1	432.9	425.4	395.3	346	311.1	305.1	303.8	318.7	307.1	326.9	303.6	301.9	292.6	275.6	358.9	447.8	240.3	150.5	114.9	79.26	48.29	39.32	42.39	1155
	3205	221.2	299.3	497.6	459	480.7	427.4	359.8	406.3	335.2	390.8	374.3	400	424	415.4	408	427.4	413.1	357.6	314.9	304.3	300.8	321	318.9	323.6	314.7	300.1	295.8	266.6	305.1	460.1	297	157.2	122.9	83.78	57.7	37.48	31.3	223.2
		382	345.7	451.9	552	555.1	413.4	405.1	365.9	352.2	374.6	382.7	393.9	404	382	435.8	416	390.4	343.3	308.2	303	295.7	301.8	321.1	317.8	314	309.7	285.4	286.2	289.5	440.9	380.5	186.6	125.5	97.09	62.55	42.52	29.85	53.73
		832.7	352.3	397	539	503.5	366.2	393.3	359.7	334.7	381.9	358.3	397.8	442	407.9	399.9	410.4	374	335.5	293.7	294.3	303	302.9	307.1	314.8	301.7	317.5	291.9	276.9	262.5	359.1	423.2	224.4	149.1	97.33	74.83	42.46	30.58	28.6	480.4
		1862	261.8	445	524.2	491.1	420.6	374.5	382.3	371.5	345	355.7	347.2	426	420.9	395.7	391.3	357	336	301.2	275.6	285.8	299	294.8	306.2	312.2	306.7	292.2	287.6	274.8	308.4	425.2	263.1	142.8	101.7	67.64	50.87	29.65	25.12	93.4
			265.3	503.9	521.2	520.8	365.7	401.3	392.9	369.4	361.7	317.7	393.2	419.9	416.7	422.5	415.3	372.4	332.6	294.8	263.5	290.4	287.5	281.6	306.5	302	301.2	284	285.3	265.1	284.9	406.5	322.4	160.8	101	77	47.8	30.88	23.93	33.13	1115
			327.3	505.6	532	494.1	456.6	396.7	415.4	345.6	361.9	387	380.1	430.5	409.7	417.2	376.3	351.8	331.1	285.5	266.6	272.7	274.9	285.5	302.5	293.7	303.1	299	291.6	267.1	262.3	357.6	391.4	188.4	107.8	72.89	49.1	32.62	25.05	24.8	210.7
			511.4	439.8	437.4	464.3	442.5	354.9	364.2	373	313.5	371.4	386	405.1	399.3	412.1	368	347.5	311	272.5	278.9	270.8	256.7	285.4	292.6	297.3	306.6	299.2	280.1	280.2	271.7	306.4	407.2	220	108.3	78.37	53.71	36.05	24.6	19.73	48.52
			1182	475.4	455.3	458.3	422.2	389.4	383	368.7	311.8	369.8	397.4	418.3	387.4	410.2	376.9	361.9	310.5	267.5	263.6	262.4	260.4	266.8	289	295.9	286	285.8	286.1	264.1	255.3	268.2	394	271.7	119.9	76.09	58.36	39.13	28.22	18.11	23.44	453.2
			2307	368.9	523.6	398.6	370	358.4	401.5	336.8	349.8	353.8	354.3	419.8	435.7	395.3	371.2	321.5	297	265	261.6	256.1	257.5	262.6	271.1	273.7	287.2	281.4	276.6	286.4	259.7	256.1	330.3	302.4	141.4	83.85	63.78	41.6	29.11	21.01	19.3	83.18
				402.9	505	411.3	431.4	382.7	339.2	363.1	339.3	353	382.3	404.6	411	388.5	363.1	331.2	296.9	261.4	244.9	247.7	256.5	272.3	275	278	275.3	273.5	269.4	273.9	245.4	246.2	283	338.7	169.5	96.75	63.37	45.46	28.83	23.75	17.47	28.98	915.5
				535.7	524.1	435.4	473.6	392.5	376.2	401.4	322.2	354.6	402.8	379.5	399.7	394	357.2	312.9	288.2	243.6	240.6	239.8	261.1	259.9	265	272.6	277	273.2	268.9	270.6	247.2	242.1	241.6	331.6	211.3	97.77	63.62	43.3	32.82	22.61	17.86	16.85	169.2
				836.8	523.7	450	374.7	379.1	390.7	362.9	342.9	395.1	375.3	413	398.2	389.3	356.5	312	278	257.5	229.4	231.9	245.9	243.7	253.8	264.3	274.3	264.4	267	254.7	257.8	232.3	214.7	291.2	247.6	109.5	65.28	44.79	35.01	24.76	19.02	16.06	39.14
					506	512.8	410.4	359.3	430.2	306.3	299.3	340.2	369.2	388.1	402	364.3	336.2	306.3	275.8	234.6	222.6	227.6	229.2	241.7	253.8	253.5	268.3	270	271	251.9	242.2	228.7	209.2	242.1	270.6	130.2	68	51.33	40.06	25.39	22.18	16.59	18.44	384.8
					501.1	416	352.1	392.6	392.6	312.3	369.5	371	407.6	366.7	415.9	355.2	329	319.7	262.3	232.7	209.6	229.8	224.2	246.1	239.1	259.1	259.6	256.6	265.5	241.4	264.8	232.1	211.8	209.8	286.4	163.9	73.38	51.92	37.7	28.4	22.59	16.06	14.61	70.01
					446.4	411.3	362.6	353.8	360.3	345.4	321.1	337.8	368.4	373.2	392.3	360.7	346.1	303.2	255.2	222.3	213.2	218.1	221.2	232.2	243.1	247.8	248.4	243.6	247.5	248.3	242.3	230.5	200.2	191.8	255.4	197.5	83.03	49.87	39.02	29.03	21.04	16.51	14.5	21.25	815.8
					585.1	386.1	359.1	400.9	374.7	315.9	316.8	313.7	350.2	386.1	405.3	372.7	356.1	282.4	260.5	218.5	200.6	207	202.8	214.5	238.2	236.6	244.3	251.1	238.4	228.9	236.9	222	201.9	172.9	220.5	223	103.9	52.58	37.78	29.09	21.9	16.65	12.59	12.6	152.4
						366.7	368.2	371.4	349.2	346	310.6	322.4	329	369	380.4	356	327	278.4	249.4	210.2	199.3	202.6	203.7	211.1	230.3	242.9	239.3	241.9	247.4	240.2	225.5	220.2	201	167.7	183.1	234	126	59.28	44.7	29.35	24.4	17.01	13.8	10.94	32.51
						376.2	361.4	349.7	345.4	325.2	328.4	331.5	359.6	367.5	344.6	362.5	316.9	279.6	250	210.2	200.8	185.9	195.6	212.4	211.1	217.9	226.2	241.2	250.9	233.9	225.4	217.3	197.6	163.9	158.5	213.6	156.4	67.82	45.26	33.18	22.2	17.74	12.52	12.74	15.79	363
						361.6	374.8	391.7	364.8	340.9	300.3	342.6	325.9	375.3	355.9	354.7	296.2	264.3	228.4	196.2	198.1	188.5	194.4	194.5	202.1	208.8	214.8	236.9	229.9	228.3	216.5	211.1	199.9	163.8	139.9	183	182.5	79.68	43.88	35.16	23.22	17.79	13.24	12.25	10.65	65.75
						357.3	378.4	406.1	370	330.4	331.1	321.9	330.5	379.9	371.8	350.2	290.5	257.4	222.3	200.5	187.4	175.5	178.8	177.1	196	208.2	216	229.4	219.1	220.4	225.6	196.9	199.2	158.6	133.9	151.1	189.5	99.83	47.64	31.68	24.71	17.61	14.35	11.7	10.83	18.23	782.2
						506	344.8	381	342.1	323.5	298.7	319	344.3	361.1	353.4	341.2	307.3	243.1	212	196.7	178.6	177.9	168.8	173.2	189.5	204.6	202.5	215.6	215.5	216.3	217.6	193.5	185.9	161.7	135.6	121.4	190.1	125.5	56.11	32.58	24.55	18.45	13.88	11.8	10.38	12.02	146.4
							366.9	318.6	350.1	282.5	296.2	304.7	346.9	320.8	355.5	345.7	300.2	228.6	217	185	162.7	175.8	165.5	183.9	181.1	183.5	204	203.1	214.6	201.3	196.1	196.9	181.2	154.2	133.8	111.6	155.1	140.4	60.39	36.47	26.12	19.78	15.04	13.09	8.889	9.581	31.55
							298.7	301.9	355.6	295.9	285.3	281.3	316	320.2	343.7	316.4	260.1	236.2	203.8	179	170.7	175	164.3	166.2	175.6	189.9	187.7	195.1	196.9	203.8	202.3	190.1	183.5	162.7	129.5	98.86	132.4	152.2	72.82	35.51	26.29	23.32	15.45	12.18	9.644	8.144	11.99	324.6
							325.5	337.3	318.7	304.6	278.4	317.3	334	332.8	322.8	324.8	269.6	246.5	192.4	182.1	158.1	164	152.4	164	173.8	169	183.3	189	188.7	194.6	197	181.7	166.9	149.6	128.6	108.4	107.5	147.9	95.81	44	26.52	22.98	16.81	12.41	9.056	8.239	8.481	58.77
							367.7	271.4	358.1	276.9	279.7	306	319.8	345.8	320.1	296.6	268.3	236.8	189.2	169.1	146.2	129.8	153.5	159.1	169.2	174.7	174.1	188.7	190.4	182.7	179.6	174.4	173.6	152.2	121.2	108.1	84.48	136.5	114.9	46.2	24.46	23.15	17.26	12.1	9.757	7.049	9.137	17.21	753
							521	296.2	315.3	269.4	300.7	267.7	292.7	325.7	324.2	288.6	242.9	228.7	180.2	164.1	142.2	134	151.4	142.9	155.9	161.6	166.7	180.1	185.8	177.3	189.1	171.5	161.8	144.4	115.1	94.79	82.21	108	128.2	55.37	29.22	22.73	15.43	11.81	11.08	6.926	7.368	8.76	142
								309.4	300.5	274.7	273	269.4	314.6	319.1	289.6	300.9	245.5	207.3	167.5	160.9	138.4	147.9	146.3	134.7	154.6	154.6	167.4	171.4	170.2	178.7	170.4	163.1	169.6	134.5	115.7	93.18	81.35	88.98	129.5	72.05	29.73	23.85	17.55	12.44	10.04	7.518	6.911	8.45	29.66
								284.9	276.4	307.4	247.3	269.7	291.9	281.1	302.7	299.6	223.7	205.4	173.9	147.1	137.7	133.5	139.1	135.3	153.5	156.1	150.2	158.8	160.9	168.3	168.7	167.1	161	133.2	117.8	96.5	78.56	76.86	114.2	92.2	34.71	22.87	16	12.16	11.78	6.944	6.39	6.198	11.34
								306.7	297.1	259.7	264.1	272.9	268	300.7	302	268.9	226.7	197.2	172.5	142.3	135.1	124.5	134.9	130	134.7	144.6	146.5	156.7	163.7	153.1	162.6	167.2	153.1	130.2	117	91.82	78.54	64.2	98.54	99.94	38.51	22.27	19.4	11.9	10.23	7.679	5.897	6.799	7.872
								320	307.1	259.5	251.1	293	272.7	296.8	281.9	240.9	221.2	187.7	162.6	141.6	128.2	124.7	126.8	127.3	129.4	140.6	138.6	151.6	149.3	153.3	150.9	147.4	138.6	130.4	112.4	89.34	75.17	60.89	80.05	107.2	50.59	24.32	16.65	11.66	9.206	8.334	6.874	6.31	6.328
									275.1	265.7	246.7	243.7	248.4	280.5	247.6	250.8	226.1	175.4	163.1	129.4	126.7	112.1	115.7	117.3	127.5	134.9	134.8	142	153.6	145.2	145.9	148.8	132.1	124.1	109.3	92.18	71.85	57.96	60.1	103.6	67.75	25.88	18.19	15.07	9.965	9.377	8.257	6.771	6.825
									293.7	250	253.7	242.2	239.9	272	257.9	228.8	211.8	175.5	145.2	118.6	123.4	101.8	106.6	118.2	122.8	127.4	127.5	131.1	135.6	138.6	141.2	139.9	132.9	115.6	105.2	90.12	74.41	50.81	55.8	89.55	83.4	29.8	18.68	13.47	12.23	8.884	9.238	6.247	6.459
									282.9	237.5	232.9	211.8	251.3	261.7	271.8	231.5	210.5	163.4	141.3	117.1	113.8	115	104.1	113.4	115.5	111.6	124.8	129.6	127	136.7	129.5	128	120.7	116.7	100.9	80.82	67.18	52.92	47.04	73.67	85.59	43.97	18.48	14.24	11.42	9.039	8.756	6.931	6.497
									275.9	248.4	231.6	242	250	262.3	237.5	228.1	194.5	152.3	135.1	105.3	110.4	114.2	99.79	105.3	107.9	111	115.9	119	128.3	124.7	125.8	130.8	120.8	106.8	94.25	78.44	66.65	53.03	45.37	53.1	85.22	51.55	20.04	15.01	11.73	8.783	8.491	7.839	6.67
									305.1	260.2	199.1	225.7	212.8	240.7	250.6	232.9	185.2	163.4	132.2	110.7	101.6	98.46	99.24	111.3	106.3	102.2	113.7	111.6	124.2	117.7	126.3	123.7	120.7	102	91.1	81.08	60.78	54.07	44.26	43.44	73.7	65.6	24.38	14.58	11.52	10.75	8.382	8.549	6.845
									430.9	213.6	211.8	245.2	222.4	259.9	231.8	201.6	169.1	152.8	119.5	98.69	101.5	98.6	95.61	97.69	99.61	94.98	109.8	117.8	116.2	119.3	116.2	118.8	116.7	95.19	87.24	78.35	60.85	51.56	46.39	36.29	59.06	68.55	31.78	15.42	13.7	10.69	9.983	9.715	7.047
										224.6	201.2	221.7	210.3	229.8	204	209.9	172.7	145.1	114.2	106.7	90.42	95.82	84.59	78.65	90.84	96.07	98.27	100.2	105.3	117.7	120.2	108.6	109.6	102.1	87.22	80.83	59.67	48.8	42.19	34.67	47.97	75.29	41.78	18.51	12.07	11.32	8.655	10.41	7.651
										252.6	178	209.2	212.3	197.4	205.3	196.6	145.4	133.8	106.8	104.5	90.34	84.1	90.49	83.08	87.14	92.37	97.69	104.5	105.3	100.4	113.2	107.8	103.7	94.23	80.88	76.44	59.66	47.31	42.31	37.16	34.96	71.14	50.15	20.63	14.62	11.6	10.08	8.886	8.534
										274.2	183.3	216	205.7	205.3	216.9	200.7	165.2	119.8	97.93	91.18	89.36	77.93	79.88	85.51	88.56	92.92	87.7	94.15	96.71	99.49	110.8	101	99.94	85.77	84.83	73.43	59.69	49.1	37.04	34.71	31.78	56.81	60.55	25.25	15.98	12.01	9.166	9.915	7.27
										269.6	200.1	231.1	194	203.6	217.8	182.2	146.7	123.8	110.3	91.34	83.82	79.36	67.99	81.15	75.88	81.4	92.06	94.59	95.97	99.42	96.57	107.3	96.47	86.02	76.35	68.19	59.31	49.6	38.1	36.16	26.86	47.81	59	30.25	16.95	11.77	10.92	7.703	8.396
										376.1	179	181.3	178.5	223.2	181.8	185.9	153	124	104.5	88.56	78.13	72.04	69.68	69.81	77.32	80.76	86.89	87.54	96.39	98.03	92.4	95.37	97.35	74.97	77.09	67.87	55.57	44.22	36.58	33.34	28.15	33.82	63.05	42.68	16.93	11.17	12.35	8.527	8.72
											197.6	200.2	189.2	205.5	197	170.5	151	112.5	102.4	74.83	74.24	68.46	70.33	63.1	76.49	71.63	83.41	81.51	90.17	88.93	91.59	96.38	88.68	86.33	67.96	59.59	55.52	44.51	34.62	32.31	27.62	28.19	57.16	52.95	19.32	15.01	13.74	9.759	8.155
											189.6	204.5	184	198.4	194.6	150.6	132.7	105.5	91.32	77.87	71.9	64.4	72.4	69.35	68.04	73.23	84.97	81.65	89	87.06	87.61	85.44	87.56	75.82	67.9	62.47	47.76	42.91	36.74	29.5	26.65	23.43	41.34	57.95	25.16	14.18	13.74	10.91	9.119
											194.4	175.8	186	172	190.6	174.4	129	96.75	83.28	77.12	66.45	64.5	71.45	63.73	71.45	70.99	78.95	83.66	86.9	83.58	82.09	81.67	78.33	78.94	67.37	60.39	48.63	42.19	36.14	29.28	25.59	26.24	35.05	55.79	32.56	15.08	11.62	11.26	9.251
											190.4	184.1	176.7	182.1	192.2	149.4	116.7	95.19	74.82	73.76	60.7	67.3	63.15	58.6	65.8	70.08	70.31	66.32	75.65	78.29	86.56	77.54	77.18	69.2	57.21	56.43	46.71	41.54	30.83	31.09	24.93	24.69	27.16	49.03	39.76	18.39	13.05	10.53	9.947
											330.1	174.8	161.1	181.3	148.3	165.4	131.5	98.88	73.89	76.02	64.29	53.87	57.05	60.88	66.45	65.94	74.06	66.19	72.71	77.56	73.52	72.16	79.6	66.04	62.14	59.32	43.92	38.12	35.3	29.58	24.83	22.88	25.54	47.22	51.04	23.19	14.66	11.78	11.42
											1113	171.4	169.4	170.7	167	149.9	116.5	93.33	80.59	66.39	65.9	58.26	51.01	63.48	56.6	58.86	59.16	65.12	68.57	74.2	76.93	73.94	71.08	65.16	62.57	55.45	42.33	35.6	34.71	28.88	22.47	22.97	21.59	34.03	51.26	27.35	13.01	13.18	9.354
												166.2	166.7	171.3	159.7	139.7	122.8	89.87	69.96	69.2	65.25	54.68	52.76	58.61	55.52	51.03	65.24	63.27	65.09	73.07	72.11	65.23	63.7	60.17	57.45	52.2	39.46	37.29	30.78	28.7	25.02	22.1	20.84	26.87	50.13	36.96	15.61	12.46	11.17
												163.9	166.5	165.2	148.3	134.1	107.1	85.87	68.65	63.81	55.86	54.57	49.48	56.98	52.75	53.89	57.21	60.38	57.06	67.71	68.22	66.31	70.31	60.04	54.03	47.67	37.66	36.32	35.1	30.03	24.25	23.59	20.96	20.75	39.75	38.2	16.95	10.7	10.29
												155.2	148.7	151.9	164.6	129	101.9	89.37	72.05	61.29	49.73	51	46.12	53.47	46.5	47.14	55.9	60.22	62.15	62.28	62.6	62.43	58.72	54.51	50.7	49.01	38.04	32.76	30.4	30.35	24.86	23.59	20.81	19.02	32.3	44.27	20.02	11.43	10.75
												270	148	184.3	150.6	129.4	103.1	86.98	71.59	59.06	47.6	47.51	47.87	49.05	51.13	54.51	52.13	51.79	57.23	61.12	58.77	61.54	60	53.11	53.12	47.59	37.13	29.69	30.2	23.22	24.87	19.91	19.14	18.77	25.79	45.18	25.86	14.45	12.97
												896.1	163.5	168	141.6	130.4	98.74	76.37	66.23	54.72	51.3	42.73	45.57	44.84	45.73	45.06	48.46	54.73	51.07	56.26	57.19	52.83	58.64	47.06	47.08	45.8	39	28.8	30.5	25.98	22.11	21.53	17.53	18.23	24.64	44.37	31.51	19.01	10.66
												2669	159.9	151.2	148.3	124.9	107	74.59	64.92	57.74	51.77	46.64	39.97	44.35	46.62	46.64	45.05	51.87	53.91	49.1	51.87	52.42	56.1	49.41	43.01	44.32	33.48	30.26	25.98	23.67	22.82	23	17.55	18.71	19.28	33.03	36.7	19.01	11.75
													140	146.1	138.3	109.8	91.35	74.28	60.19	53.22	43.78	43.31	40.44	39.26	44.68	44.69	44.22	44.63	50.45	51.59	55.19	57.54	56.68	49.91	45.2	45.37	33.83	31.37	27.31	22.74	23.04	20.19	19.8	18.13	18.14	25.07	40.84	23.31	11.31
													163.3	143.6	119.7	106.6	88.52	71.98	59.68	47.84	43.46	39.71	41.35	35.83	42.25	40.69	48.1	46.4	44.7	49.03	51.65	52.87	54.38	42.74	44.96	36.54	32.12	29.66	25.56	25.23	22.34	21.69	18.05	17.72	17.85	22.69	33.79	27.23	12.64
													204.9	130.6	111.2	95.05	92.59	72.38	52.84	46.74	46.69	36.17	34.95	40.78	37.57	42.12	48.74	41.59	42.15	47.12	50.37	49.61	48.43	40.54	38.65	35.51	32.09	26.92	24.9	25.62	22.36	18.82	21.18	16.02	17.33	18.34	31.59	30.45	15.61
													655.6	130.9	120	97.02	85.4	63.08	56.13	39.4	38.34	38.49	39.64	36.4	35.14	38.26	42.46	39.69	40.17	43.62	45.39	41.9	45.55	40.53	42.55	34.75	28.96	29.19	24.17	22.06	22.37	21.31	17.33	16.74	16.61	15.36	27.48	33.24	20.45
														134.7	141.2	108.3	84.53	64.91	48.96	43.99	38.41	35.86	36.39	37.26	34.09	35.38	39.42	38.55	39.03	42.77	40.39	46.49	45.38	42.55	34.68	32.8	28.37	26.41	23.09	22.16	19.45	20	19.52	16.72	18.42	15.26	23.02	34.26	23.54
														126.9	123.8	102.6	79.34	67.76	48.85	40.41	40.12	38.28	33.85	29.89	37.04	35.9	37.87	35.07	41.44	41.67	41.85	43.77	37.53	37.57	37.61	29.77	28.56	24.05	20.98	19.66	18.14	17.29	18.01	15.91	15.62	13.67	17.72	30.08	26.29
														134.6	119.5	96.71	79.81	55.24	41.05	39.71	37.24	31.04	34.57	31.52	34.96	34.01	35.63	32	34.79	35.86	38.07	42.24	39.72	36.09	35.16	28.17	27.58	25.46	21.1	20.9	19.4	17.03	15.4	16.88	13.98	17.1	13.98	23.77	31.03
														197.4	114.9	98.4	79.8	59.18	40.5	35.7	31.34	34.26	30.53	30.35	34.53	30.38	30.25	34.25	34.43	34.86	36.86	38.39	35.21	34.61	35.25	29.28	28.32	20.85	21.55	19.82	19.18	17.5	15.59	14.55	13.95	14.57	14.39	20.37	30.18
														567.4	98.27	94.75	78.55	62.9	45.62	40.27	32.89	29.03	33.44	31.69	30.47	32.09	30.72	33.38	31.54	32.17	35.22	34.58	36.75	33.92	32.55	25.9	22.51	24.23	21.43	20.01	18.24	15.24	17.22	16	13.49	14.13	11.56	17.77	25.39
														1615	112.6	92.75	71.36	58.33	39.21	33.44	34.29	30.88	24.98	30.45	30.05	29.73	28.29	31.27	30.93	33.34	33.13	33.18	34.2	29.44	30.74	23.54	23.14	21.16	21.57	16.37	17.1	16.9	15.38	14.97	14.06	12.76	14.4	14.42	24.16
															97.13	77.49	69.03	56.77	40.1	33.96	26.06	27.41	21.52	24.8	34.4	27.95	28.73	30.37	30.42	34.01	33.81	32.36	32.53	31.23	30.58	25.85	21.73	19.83	18.09	15.49	15.63	13.88	14.66	14.97	13.62	12.49	11.23	10.87	18.97
															118.7	79.32	56.44	52.32	39.51	29.95	25.68	28.43	26.91	24.6	27.31	27.49	28.85	29.07	30.28	32.36	30.35	27.42	31.23	29.59	28.02	25.2	19.54	19.68	19.11	17.51	14.1	13.34	14.75	15.62	13.25	13.35	10.26	10.83	17.24
															157.3	87.01	62.09	45.49	42.63	32.76	25.29	27.69	28.17	23.83	22.63	26.32	27.54	26.67	28.32	25.17	27.76	27.8	29.09	28.5	24.37	22.63	20.72	19.74	16.4	15.44	15.84	15.65	14.01	13.1	12.67	11.34	10.77	10.75	13.53
															442.4	73.81	64.66	45.35	37.92	26.2	25	27.14	22.62	23.88	25.55	24.33	27.08	24.89	24.2	26.68	26.24	28.75	24.65	26.74	22.42	24.77	17.8	18.04	16.23	15.99	14.54	15.05	13.06	12.55	13.4	12.02	12.3	10.84	10.94
															1320	82.21	49.88	48.21	36.99	30.98	28.14	22.65	22.99	19.35	21.54	25.29	23.5	23.34	24.27	22.04	25.67	29.48	25.79	25.16	21.86	18.2	17.89	16.86	14.34	14.55	12.7	13.84	12.46	10.95	12.45	10.76	12.22	10.35	10.34
																79.53	59.25	38.49	35.92	27.79	22.68	24.83	20.53	24.15	20.47	25.14	22.68	23.64	26.53	24.56	20.91	28.57	24.59	25.04	23.47	19.97	18.01	19.48	15.51	14.25	14.33	11.84	12.16	11.81	11.57	9.414	11.41	10.52	10.17
																81.45	55.18	39.22	30.26	27.36	22.34	20.09	16.65	20.58	20.99	22	20.44	23.12	23.66	24.7	23.52	24.7	24.91	22.32	21.2	17.97	16.85	16.96	13.75	12.62	13.02	13.02	11.36	11.09	12.34	11.61	9.663	8.945	8.102
																114.8	51.17	32.42	31.33	23.65	23.32	18.63	18.64	21.62	19.55	21.53	21.54	22.31	20.69	20.63	22.69	24.92	24.09	22.09	20.09	18.15	16.2	16.29	13.27	13.96	12.25	14.3	9.82	11.04	10.33	12.47	10.7	9.415	7.668
																325.8	48.83	37.57	26.23	25.15	22.12	19.09	17.18	17.84	17.69	21.67	21.51	19.72	20.53	19.96	21.92	22.48	21.01	19.23	19.7	17.28	13.41	15.62	14.25	12.66	11.31	11.72	11.61	10.63	10.01	9.838	8.443	8.517	9.441
																905.9	54.57	34.65	27.79	25.13	17.94	15	19.17	17.4	18.49	21.83	17.97	18.53	20	19.88	22.32	20.6	19.21	19.21	18.48	14.97	14.92	12.41	13.58	11.2	12.52	11.79	9.408	9.125	11.14	8.99	9.119	7.884	7.95
																	55.97	36.25	29.21	22.92	21.14	18.07	17.11	18.61	17.11	16.52	15.9	19.18	18.75	17.31	20.61	16.73	19.62	16.51	19.48	14.62	13.28	11.75	12.91	10.03	10.09	10.58	11.67	9.222	8.733	9.041	8.34	9.489	6.978
																	48.04	32.15	26.19	21.03	17.66	16.72	18.49	20.91	17.36	15.52	16.78	19.31	19.4	18.52	18.5	19.21	15.79	17.56	16.03	13.84	13.36	11.36	11.55	10.48	9.766	8.904	10.67	9.763	9.499	9.001	9.69	7.381	8.12
																	77.61	28.22	26.22	25.65	18.84	14.3	18.88	16.71	17.49	17.48	17.33	15.76	16.28	17.7	14.3	17.06	18.45	17.45	16.1	13.12	14.48	13.09	9.491	10.26	10.03	9.221	7.788	8.875	9.006	8.498	7.78	8.821	7.965
																	238.1	33.33	24.18	20.91	16.99	15.06	13.89	13.5	12.96	16.4	12.89	15.53	16.35	18.65	17.64	15.48	16.06	16.48	14.8	14.98	12.15	10.73	11.5	10.22	10.12	9.219	9.269	7.97	8.359	9.137	8.409	7.254	7.189
																	672	39.48	26.15	19.76	17.1	14.68	17.21	12.08	13.56	16.44	15.35	14.31	13.97	14.61	18.19	16.5	13.46	13.28	14.88	13.91	10.55	12	10.31	10.27	10.34	8.81	9.408	8.343	8.736	7.463	5.795	6.11	5.639
																		35.47	27.39	16.39	16.47	15.76	13.42	11.87	15.64	13.11	12.53	12.28	14.82	15.39	12.86	17.18	16.22	12.8	14.57	11.59	9.629	9.812	9.652	7.785	7.534	9.163	7.427	7.544	8.176	8.328	6.581	6.362	5.379
																		37.13	25.6	19.94	13.33	15.54	16.38	13.36	13.1	11.34	12.18	15.21	11.93	13.32	13.49	16.7	12.52	12.75	12.83	10.73	9.37	9.621	11.43	7.033	8.428	8.382	7.307	8.459	7.764	7.472	6.024	6.763	4.634
																		64.65	24.54	16.23	15.41	15.19	14.36	10.8	11.3	14.71	11.36	14.43	12.56	15.29	11.22	13.04	11.66	13.47	12.48	10.93	10.35	8.937	8.639	8.391	8.01	7.24	6.758	7.08	7.566	6.486	5.461	6.495	5.281
																		194	25.64	15.53	14.98	12.84	13.7	11.19	11.84	12.19	11.64	13.27	12.74	14.19	13.51	11.95	11.31	11.69	12.73	10.61	9.813	7.458	9.544	8.13	6.667	7.479	5.666	5.824	7.604	5.638	5.564	5.372	5.774
																		528.3	23.15	15.13	13.9	12.5	12.92	12.65	15.13	11.07	12.76	12.91	12.17	12	13.01	13.16	9.705	9.833	9.405	9.001	9.139	7.737	8.702	5.476	7.316	8.876	7.429	4.53	7.268	6.3	5.027	4.636	6.903
																		1272	20.2	16.92	17.6	11.86	9.717	10.79	11.67	10.01	11.21	11.01	11.5	13.35	10.65	9.812	11.36	10.53	10.5	9.68	7.038	7.102	7.168	5.938	6.843	6.357	8.016	7.111	6.893	5.51	3.767	3.79	5.29
																			27.62	17.75	12.99	8.339	12.2	7.751	9.078	8.171	9.385	9.461	8.986	10.87	9.172	12.23	11.71	9.385	11.22	7.868	7.972	7.446	7.157	5.584	5.273	5.807	5.023	6.11	4.869	6.114	6.069	5.554	5.458
																			52.38	13.72	15.71	9.238	11.12	9.286	8.61	8.648	10.28	10.78	12.01	12.99	8.345	11.23	10.87	9.137	11.8	8.88	6.418	7.807	7.61	7.097	6.56	4.308	5.852	5.461	4.896	5.331	6.293	5.318	4.491
																			153.4	14.39	15.05	15.4	12.19	10.17	9.478	11.8	9.436	9.617	9.174	10.55	8.31	10.48	11.69	10.96	10.09	8.595	8.17	8.088	5.96	6.835	6.277	6.377	5.877	6.224	5.063	4.802	5.319	4.593	4.264
																			440.6	17.65	14.55	9.155	12.09	8.028	9.466	8.091	9.477	8.934	10.54	10.48	8.132	7.892	11.02	8.23	8.133	8.342	7.049	6.371	6.695	5.845	5.973	5.862	5.165	4.852	4.909	4.201	5.314	4.913	3.707
																			1074	18.77	15.65	11.62	12.76	8.685	8.327	9.556	10.21	8.16	10.42	8.253	7.887	7.966	8.695	10.61	6.878	5.899	9.155	5.308	6.163	4.89	5.848	3.862	4.959	4.347	5.524	4.253	5.876	5.065	3.881
																				18.49	13.64	11.42	9.698	6.451	8.114	10.7	6.998	7.064	7.696	7.749	8.52	7.27	9.023	8.17	5.69	7.149	6.542	6.821	6.518	5.616	4.186	4.653	4.127	3.899	3.727	4.565	4.042	4.622	4.386
																				42.17	12.91	10.46	10.64	7.677	7.7	7.741	8.675	7.203	8.526	8.106	8.884	6.682	6.544	6.76	6.935	5.541	6.526	7.007	6.635	4.723	4.604	4.377	4.891	4.164	5.311	3.861	3.526	4.046	3.56
																				131.2	13.41	11.75	7.881	8.913	7.318	9.123	9.32	7.312	7.48	8.352	8.136	6.581	6.779	6.912	7.546	7.304	5.552	6.749	4.281	4.541	4.04	5.199	3.589	4.455	4.307	4.103	2.967	3.997	4.395
																				381.7	11.55	12.17	8.374	10.78	6.954	6.675	8.067	7.55	6.538	6.985	7.027	7.902	5.799	7.823	5.541	4.957	5.678	6.184	4.782	4.679	3.743	3.063	3.367	3.424	4.107	3.557	3.06	3.619	3.619
																				956.1	13.26	9.385	7.888	6.818	8.025	7.113	7.793	7.2	6.03	7.719	6.692	9.217	5.54	7.387	5.955	4.975	5.544	5.443	5.123	4.265	3.71	5.24	4.24	3.97	3.354	3.76	3.77	3.549	3.019
																					13.56	9.014	8.826	7.386	6.888	8.301	7.92	6.966	5.756	6.519	5.733	5.774	6.243	5.67	6.525	4.819	4.441	4.849	5.11	4.114	3.345	4.834	4.293	4.233	3.97	2.494	3.622	3.414	3.287
																					43.34	8.531	9.382	8.96	8.005	6.22	7.393	7.067	6.002	5.771	5.837	6.221	6.065	5.562	6.12	3.619	4.158	4.134	3.719	4.598	4.996	4.009	2.946	4.074	3.333	2.854	3.435	2.46	2.923
																					109.4	11.46	9.174	5.272	5.735	5.49	5.001	7.506	5.794	6.005	6.191	6.19	5.545	5.381	4.938	4.761	3.633	4.303	4.793	4.407	3.814	4.362	2.238	3.467	3.219	2.447	3.163	3.442	2.7
																					305.2	11.27	8.912	8.492	6.07	6.641	4.746	5.681	6.814	6.53	5.594	3.817	4.992	6.465	5.821	4.342	3.308	4.276	3.347	4.368	3.618	3.329	3.172	2.886	3.881	2.049	3.277	2.524	1.918
[truncated: 1 more columns]
