# Supplementary material for: Utilization and transformation of Chrysotila dentata-derived dissolved organic matter by phycosphere bacteria Marinobacter hydrocarbonoclasticus and Bacillus firmus
Source: PeerJ. 2024 Jan 4;12:e16552. doi: 10.7717/peerj.16552 (PMC10771764; doi:10.7717/peerj.16552)
Supplement: Supplemental Information 5 [file peerj-12-16552-s005.xlsx]

## Sheet: Sheet1
31.94	65.15	68.9	108.2
25.24	57.08	99	194.9	494.4
66.19	26.86	97.81	400.4	311.9
83.49	-2.945	126.9	349.3	456.6
39.98	190.4	68.18	198.8	516.4	462.4
49.55	87.14	167.6	117.2	645.3	351.5
84.48	69.98	23.09	76.74	510.3	570.9	744.2
61.32	47.31	135.9	78.06	441	748.6	327.7
120.1	36.23	129.3	77.38	172.1	832.7	370.8
50.65	52.36	123.7	88.49	91.9	688.3	581.3	416.9
36.95	87.73	103.7	87.15	188.3	471	790.5	269.1
141.2	116.1	155.4	82.86	182.1	268.2	816.7	319.4
12.7	47.17	109.4	148	128.2	202.7	703.1	511.6	289.1
94.15	75.65	76.62	164.4	118.1	120.2	486.5	840.1	247.9
197	139.2	123.8	95.54	61.87	77.26	303	922.7	410.9	487.2
149.6	251.2	171.8	59.15	81.97	119.1	150.3	812.9	707.1	242.9
75.7	114.7	103.4	160.3	134.1	99.9	100.5	537.1	1031	290.8
102.3	197.9	149.7	189.3	135.1	109.2	99.47	244	973.1	544	292.6
90.98	158.9	110.2	186.6	116.7	64.62	63.81	133.4	811.1	793.5	207.1
245.3	127	133.3	174	207.1	95.29	99.57	95.84	496	1076	329.9	528.4
130.6	243.5	127.7	166.7	158.1	114.9	83.58	93.89	244.3	1171	597.1	217.7
197	147.8	183.9	197.8	123.1	68.59	93.97	78.8	124.5	848	972.4	179
328.8	134.8	260.2	180.1	202.7	141.4	114.8	73.53	82.76	576.3	1184	293.4
234.3	226	238.9	298.3	329	218.7	157.6	71.99	90.29	245.5	1299	678.5	193.1
106.3	182.3	232.5	342.4	318.4	311.5	144.6	78.96	54.83	139.4	946.4	1067	212.5	638.8
135	198.5	233.1	279.8	394.7	267	155.8	73.85	76.05	68.31	520.4	1580	393.2	268.2
205.8	180.5	272.6	326.4	558	415.4	172.7	87.64	68.87	86.53	288.6	1410	768.7	223.2	1470
206.8	227.4	374	365.4	579.3	455	226.3	107.4	59.87	72.32	184.1	1085	1238	278.7	428.8
281.5	122.3	193.6	539	636	522.6	207.1	125.9	89.84	71.32	135	623	1696	474.9	314.6
142	300.6	182.4	534.5	608.1	659.9	235.3	130.3	84.1	100.7	130.8	341.5	1745	859.6	325	811.1
228.3	170.5	216.1	632.7	845.8	714.4	291.9	129.2	141.6	110.9	141.7	242.2	1329	1462	396.5	437.7
309	140.3	269.4	413.7	883.1	780.9	355.7	178.6	129.9	137	146.4	254.4	818.3	1885	671.3	388	1607
120.8	138.3	378.2	474.4	880.5	713	439.4	250.5	134.2	130.4	183.2	253.7	557.1	1887	1044	433	584.3
286.7	127.5	259.6	427.5	811.1	729.6	511.8	295.7	176.4	186.2	190.4	280	416	1570	1640	570.3	442.7
180.2	318.1	264.6	480.5	674.4	806.6	495	265.5	205.4	235.6	255.7	331.7	439.7	1055	2159	792	425.1	765.3
379.6	143.6	341.2	591	732	913.1	625.6	310	253.2	218.2	266.5	399.1	434	727.5	2212	1232	489.8	405
246.2	321	308.3	596.7	867.9	867.2	544.8	383.4	270.8	243.5	325.9	446.8	527.7	689.6	1843	1808	591.4	370
266.3	163.6	293.8	544.7	849.1	853.9	647.5	313.1	227.8	273.3	341.6	464.6	535.6	681.8	1410	2284	790.7	367.3	359
166.2	137.2	305.1	570.1	794.4	907.5	610.6	326.9	269.4	287.2	365.9	514.5	615.8	696.8	1033	2340	1176	414	273.9
249.3	156.7	345.6	554.1	757	723.3	657.2	337.3	289.1	339.5	425.1	574.5	687.8	835.8	923.4	1992	1681	492.2	272.8	443.2
244.6	151.1	186	515.7	951.3	877.2	649.3	441.7	344.3	364.8	423.3	621.9	771.8	847.4	1007	1538	2147	641.4	264.4	201.5
311.6	212	241.1	590.7	1037	905	684.5	397.4	371.3	394.3	557.8	643.3	768.4	943.9	1007	1178	2197	1008	301.1	175.8	719.6
244.7	208.2	263.9	660.4	958.8	855.4	654.4	478.9	389.5	410.6	517.3	736.6	836	987.6	1043	1036	1895	1426	362	187.9	230.7
267.3	200.7	286.3	566.9	811.9	853.4	630.5	478.3	412	462.9	558.8	769.6	937.6	1132	1118	1085	1492	1907	502.2	189.9	140
214.9	250.5	259.2	708.8	1186	996.3	782.7	466	404.7	472.7	591.6	798.2	969.1	1118	1162	1100	1163	1926	794.6	213.4	132.8	294.9
244.9	184.7	224.5	723.3	1329	1167	747.6	561.8	441.5	496	617.2	871.9	1006	1180	1231	1161	1020	1715	1210	266.3	137.3	130.8
150.7	157.8	268.8	785.7	1379	1179	774.4	507.4	501.3	499.7	640.3	859.4	1087	1220	1253	1198	996.7	1316	1542	374	149.9	117.3	533.7
199.5	190.8	218	632.6	1590	1190	853.7	548.7	522.6	555.3	686.1	917.8	1149	1224	1320	1251	1040	1030	1607	579.6	164.8	110.1	154.1
118.6	166.5	306	686.2	1399	1286	818.4	576.3	524.6	575.3	681.7	887.9	1120	1303	1323	1323	1036	831.7	1446	949.4	179.9	112.2	90.1
128.4	176.1	205.2	615.5	1489	1274	858.9	675.5	479.2	563.7	703.4	911.7	1094	1239	1344	1281	1052	805.1	1043	1262	291.7	124.7	91.83	228.6
97.23	166.5	207.4	846.2	1870	1261	957.2	543.9	478.2	528.8	669.6	902.8	1101	1314	1339	1284	1071	840.6	768.3	1321	469.5	114.5	88.69	93.45
139.5	79.46	164.1	859.5	1490	1226	832	620.4	483.6	566.3	727.3	914	1099	1236	1411	1280	1076	845.4	623.7	1130	730	143.7	77.28	72.41	376.7
129.2	94.27	241	854.9	1506	1299	877.5	616.1	465.1	571.4	660.7	915.4	1106	1182	1301	1305	1131	839.7	637.5	873.6	974.2	217.1	83.92	75.84	114.8	3026
131.1	153.2	214.3	730.1	1432	1332	867	553.3	527.6	582.2	728.1	830.6	1075	1257	1296	1298	1102	852.2	568.4	580.4	1084	368.2	106	82.61	71.1	725.4
162.4	193.5	182.5	781.6	1462	1270	950.8	554.5	498.3	575.7	748.3	891.3	1018	1226	1333	1260	1098	871.4	607.1	423.4	959.4	615.4	126.9	88.45	72.19	166.3
124.6	129	185.6	779.8	1234	1156	856.8	625	506	528.4	650.7	817.4	989.3	1171	1293	1257	1061	849.1	612.8	396.2	725.4	854.7	180	94.01	80.96	79.06	1228
183.8	264	264.3	622.9	1332	1301	844.5	648.6	516.5	522.9	583.5	784.3	958.9	1138	1297	1230	1061	850.3	622.9	393.5	467.1	953.7	328.1	99.95	77.13	75.65	265.1
140.4	205.8	231	710.2	1290	1109	825.5	596.8	466.6	503.7	594.5	794.3	921.1	1127	1192	1188	1049	811.7	624.7	376	345.2	861.5	522.9	123.2	90.99	79.41	101.1	1968
145.3	161.5	279.6	554.5	1369	1159	810.4	525.6	496.6	527.4	606.7	743.9	905.1	1106	1169	1123	1018	803.8	607.1	379.5	277.4	638.8	729.9	172.9	113.5	82.45	81.22	445.6
160.4	182.5	214.7	583.6	1264	1093	779.2	559.3	470.3	465	622.8	712.8	856.9	1034	1195	1111	993.7	819.5	589.8	380.9	274.5	428.3	862.9	290.1	117.8	91.96	88.12	133.8	3878
231.1	194.8	233	631.8	1125	1176	774.8	576.1	489.5	453.5	538	688.9	810.3	1004	1124	1083	951.2	805.6	617.1	388.9	267.8	301.5	815.2	456.2	125.6	105.6	82.63	83.02	963.1
103.3	198.3	241.5	645.7	891.4	1110	877.9	566.2	466.3	448.9	500.2	666.8	800.4	964.9	1064	1095	956.6	812.8	631.4	408.6	276.6	257.6	630.2	661.9	189.4	103.8	94.34	74.5	203.1
64.23	71.01	215.3	594.5	855.3	1030	692.5	619.2	454.4	438.7	521	637.9	783.6	938.1	950.6	1041	952.8	784.4	603.8	389.2	293.4	234.4	432.1	788.2	270.7	115.1	95.12	70.76	80.05
174.5	159.2	252.6	710.3	1033	907.9	687	535.7	475.4	412.4	486.8	573.8	705.1	918.7	966.7	1002	889.2	785.1	600.8	405	284.3	246.3	299.9	740.8	416.3	140.8	102	84.6	61.98
108.8	150.2	150.5	547.5	873.6	1048	718.9	496.4	450.3	388.1	464.9	597.6	682.3	845	961.1	951.7	856.6	743.4	591.8	399.5	304.9	236	238.8	613.7	603	179.5	111.1	94.26	73.33	92.68
59.86	153.9	225.3	393.9	849.3	847.8	785.1	535.1	404.3	444.2	418.3	560.4	693.8	779.3	911.9	930.5	823.9	721	572.7	391.7	290.6	247.9	236.3	436.9	740.9	261.1	136.1	99.78	78.68	60.07	596.6
211.1	174.6	242.9	482.8	918	848.1	691.1	436.9	452.4	423.6	500.4	555.8	669.1	823.8	903.2	902.2	832.9	729.7	545.5	393.8	309.2	269.2	241.1	330.1	729.1	390.2	143.4	112.6	84.21	60.66	138.9
80.42	139	206.6	400.2	784.1	766.9	575.2	435.1	430.8	426.8	498	526.2	642	738.1	851.7	873	794.5	720.1	533.5	402.4	327.5	268	242.4	263.4	616.4	550.2	182.3	119.2	84.36	64.81	64.67
174.5	117.5	163.5	463.4	821	803.6	700.4	467.8	489.1	394.5	449.5	535.1	646	730.7	786.8	882.9	748.1	683.3	541.8	396.5	304.3	272	254.1	252.7	442	659.6	248.6	130	93.82	65.71	56.33
187.4	174.4	117.2	354.7	991	772.7	650.1	448.5	392.5	398.5	405.6	517.8	617.8	694.1	740.6	781.4	750.2	684.1	510.6	386.9	303.9	275.6	257.4	243.9	317.8	664.4	352.1	136.4	102	74.83	57.36	90.15
146.1	180	183.4	357.7	823.8	705.9	589.2	457.6	404.3	394.7	443.4	510.1	577.7	678.5	760.5	769.5	746.6	672.9	521.2	383.9	321.2	281.8	272.2	256.2	267.1	585.4	486.4	166.9	106.5	86.35	66.36	54.9
120.3	108.8	109.8	302.8	609.7	643.1	539.3	388.6	397.1	442.9	483.1	423.3	572.3	639.6	681	754	737.3	641.5	507	400.6	329.2	290	284.9	266	261.3	443.8	601	230.2	118.9	84.86	66.09	51.82	138.7
75.7	134.6	105.6	290.5	787.6	591.7	561.2	462.3	384.1	372	419	438.8	560.6	610.9	689	733.1	681.8	610.6	494.9	406	324.3	285.7	268.7	264	261.2	341.8	611.3	310.3	126	89.52	72.5	55.68	62.27
301.2	107.5	238	334.8	593.9	806.1	543	506.9	364.9	345	380	473.1	531.1	574.9	623.8	688.3	674.9	558.2	486.5	401.6	330.3	294.3	280.5	266.4	251.4	291.8	548.8	445	155.1	88.92	72.01	54.23	51.61	266.1
97.08	119.8	189	278.9	725.8	765.4	565.4	468.8	359.9	366	401.9	477.7	511.3	585.6	630.3	680.5	622.7	569.8	471.8	381.1	317.3	303.5	281.4	260.9	256.2	255.3	441	537.2	204.9	111.7	83.56	66.35	52.91	75.56
35.45	113.4	196.4	340	569.9	598.1	616.7	414	390.4	389.4	354.2	420.8	470.9	561	634.3	616.5	596.7	532.3	477.7	361.3	318.9	292.3	280.2	266.7	254.8	236.7	326	587.9	283.6	120.9	85.39	77.79	52.33	47.35	539.9
123.3	111.4	83.47	339.7	515.1	660.9	492.8	436.1	451.4	374.7	327.9	389.3	490	534.7	592.4	605.6	594.3	530.7	448.6	349.6	318.5	280.9	280.2	269.4	247.9	255.3	264.7	528.2	381.9	143.3	103.5	74.85	63.56	48.48	118.1
75.24	102.3	142.6	323.1	554.4	624.9	459.9	399.9	373.4	390.2	359.5	392.2	495.6	502.3	544.1	569.4	576	507.9	449.8	341.6	326	289.1	295.2	262.5	255	246	241.7	414	472.3	177.9	98.56	88.97	70.89	51.89	57.76	1101
119.5	137.3	237	255.1	564.1	550.7	481	374.7	346.9	353.4	360.7	412.1	431.8	494.6	547.2	537.8	569	518.8	419.5	365.2	325.3	293.3	289.4	279.1	258	256.1	234.3	339.1	517	242.8	124	91.42	80.23	46.75	46.99	234
274	79.05	142.4	406.8	458.6	542.2	495.9	428.7	327.2	396.7	338.6	398.1	465.1	493.4	535.5	525.4	543.5	489.2	422.9	369.1	322.5	296.5	290.8	290	273.9	245	227.3	267.7	490.3	344.7	136.7	100.5	86.41	62.33	49.96	69.23
605.3	145	115.5	342.6	467.3	497	438.3	374.3	341.6	394.5	359.9	335.6	398.7	476.1	532.8	518.6	541.6	482.7	423.6	368.5	312.5	301.9	299.2	282.9	261.9	251.5	243	240.3	412.3	430.2	169.1	118.8	89.63	74.5	55.34	42.58	498.5
1219	97.95	118.5	289.4	571.4	537	436.7	425.8	350.5	324.4	314.7	376.3	405.2	483.1	482.1	555.2	488	467	413.4	346	306.5	291.9	282.5	280.1	280	258.5	264.3	241.2	309.4	490.4	229.7	127.4	102.8	75.36	58.36	45.16	107.9
2679	151.2	172.2	228.9	419.2	532.3	434.6	381.8	326.9	369	348.7	337.1	421.1	451.3	479	500.5	490.1	449.4	409.4	352.7	297.7	278.7	278.5	275.4	281.4	273	259.9	237	272.6	467.5	312.3	141.1	115.5	89.8	68.69	47.59	44.14	1088
3264	193.5	186.5	215.6	454.4	530.7	471.2	335.2	337.7	322.6	310.1	387.9	409.9	459.8	486.6	513.8	487	459.6	400.5	340.5	293.3	277.4	287.9	282.1	282.9	268.8	245	245.6	250.2	417	391	170.7	115.3	94.29	67.45	46.3	39.04	218.5
	581.3	129.4	367.9	491.5	445.6	375.4	373.2	333.3	316.9	321.4	367.4	350.4	423.1	452.6	487.6	489.7	443.5	397.5	337.9	296.6	286.4	278.1	278.5	268.1	258.2	268.7	238.7	239.1	326.1	440.3	214.9	128.7	105.6	79.93	49.28	35.24	60.74
	974.4	144.8	257.6	427	464.4	377	413.3	351.5	332.5	335.9	356	402	423.9	482.7	464.9	462.8	424	387.8	315.5	303.2	292.4	284.5	272.3	259.1	272.1	268.2	230.2	239.6	266	436.8	293.1	144.3	107.5	83.11	56.92	37.15	39.62	424.3
	1515	111.2	209.1	422.6	403.1	348.8	416	389.6	337.8	326.8	355.1	389.3	437.2	459.4	469.9	433.9	432	400.2	320.9	287	279.2	281.9	280.3	271.8	271.9	261.1	246.4	244	241.3	402.3	363.8	169.4	119.6	94.97	62.89	44.05	39.21	87.92
		209.4	208	590.3	587.2	404.7	407.2	339.5	353.5	336	348.7	326.5	438.1	445.4	463.8	466.1	411.5	359	324.8	281.8	263.4	269.3	276.5	270.4	274.7	261.7	265.6	239.8	237.8	336.1	430.3	203.1	127.4	102.4	66.01	49.77	31.46	34.96	883.9
		175.3	175.9	476.1	485.2	396.6	357.8	319.4	341.4	315.1	345.3	357.7	403.6	401	464.4	449.7	398.9	376.8	321.5	274.1	266.8	266.8	263.2	263.6	272.9	256.3	254.8	253.3	234.5	278.2	424.7	271.1	151.2	105.4	77.37	53	38.37	28.43	175.9
		474.9	245.8	420.7	383.2	487.2	395.1	358.5	352.4	324.8	364.8	354.3	366.2	392.9	464.3	432.3	415.1	354.5	319.6	280.8	268.5	263.8	270.9	260.4	265.6	265.8	256.5	259.2	234.5	243.9	403.3	343.5	168.8	110.3	77.86	56.84	38.08	26.7	48.04
			491.3	316.3	531.4	425.3	371.5	331	339.2	318.1	321.3	363.1	364.3	425.2	463.4	450.3	408	355.7	320.5	263.7	271.5	264.6	272.3	265.8	274.3	266.5	270.3	261.6	247.6	230.4	329	393.5	195.2	117.5	86.93	64	38.15	27.54	27.32	335.9
			262.3	394.4	449.2	440.7	326.6	361.6	361.8	324.9	326.1	356.4	385.5	429.4	457.1	444.8	404.5	364.5	296.3	258.3	257.8	255.3	252.8	260.2	277.6	269.2	268	261.8	246.2	222	281.5	411.2	256.1	132.5	90.97	67.88	48.04	29.31	23.19	67.37	2707
				440.1	459	324.1	353.5	345.5	352.2	352.5	354.3	365.9	387.2	416.1	422.4	449.5	414.6	355.4	277.7	250.1	257.5	243.4	245.6	252.2	250.4	258.1	259.6	263.9	255.9	241.6	245.7	397.7	303.5	147.5	96.52	75.13	50.23	33.24	24.16	28.88	773.8
				388	477.9	367.3	359.1	381.7	347.2	333.1	318.3	378.6	393.4	411.4	431.5	433.2	390.8	345.1	304.7	265.3	242.9	248.7	249.1	255.5	267.8	257.6	270.6	253.3	247.9	245.9	240.8	336.8	369.5	171.1	102.5	78.02	55.21	35	25.25	20.9	153.3
				379.5	411	438.3	373.9	328.1	405.4	340.6	360.5	342.7	399.7	424.4	423.3	416	384.2	335.1	281.7	247.4	238.9	243.8	249.3	242.4	259.6	256.1	260.1	266.7	254.9	241.3	237.8	288.6	389.9	206	107.1	74.97	53.73	38.19	26.84	21.48	39.19	1450
				412.4	478.7	425.4	399.6	322.2	380	362.8	329.1	362.7	382.7	419	413.8	441.2	364.3	330.2	278.6	244.2	231.9	232.3	225.3	241.9	248.4	258.5	271.2	266.6	261.3	247	225.8	250.5	376.7	248.4	117.5	82.18	61.21	38.8	29.38	21.04	21.84	332.5
				340.3	494.2	450.8	365.5	322.1	354.3	336.1	343	364.6	394.6	418	412.9	421.8	370.2	323.2	290.8	231.6	234.9	228.8	225.8	234.2	259.4	251	269.4	264.6	246.7	240.3	231.7	230.6	325.9	302.6	141.7	83.04	63.05	41	31.39	20.04	16.74	65.13	2430
					334.3	457.5	418.6	337	366.5	339.2	329.5	350.8	370.4	402	404	399.2	359.8	327	267.4	234.5	238.1	225.2	226.7	244.3	249.2	254.9	257.5	266.6	251.8	248.3	238.1	229.9	271.9	338.8	167.7	83.54	61.45	45.82	31.13	21.56	17.48	22.52	688.3
					441.4	396.2	327.1	331.5	318.4	360.4	336.5	363.9	370.4	421.5	413	406.1	362	327.3	268	236.6	221.4	215	216.7	235.4	235	247.5	247.1	253.6	248.5	248.4	239.2	221.1	232.9	325.4	211.1	99.95	66.24	49.96	35.09	20.38	17.75	16.2	136.9
					439.8	326.6	401.6	370.8	352.1	341	357.3	361	361.5	409.3	381.7	373.4	343.5	312.4	256.5	219.9	224	211	215.5	237	239.2	245	248.6	257	252.1	252	236.9	221.3	208.9	290	250.8	113.7	70.24	49.29	35.71	23.38	16.42	15.13	32.57
					358.5	347.1	403.4	392.6	358.9	351.8	341.1	330.2	354.1	390.3	419.8	390.9	333.5	294.1	247.8	208.9	206.3	208	220.9	213.1	223.5	237.2	232.8	243.2	239.3	240.4	233.9	225	203.6	251.3	268.3	137.8	75.52	55.94	34.21	24.85	21.85	17.62	16.72	292.8	5133
					390.3	362.1	378.7	333.5	362.9	357.7	322.4	331.5	375.7	378.9	399.9	370.9	322.5	300.3	252.6	210.4	206.5	202.9	221.4	221.1	229.7	238.4	237.1	256.7	246.8	237.5	224.2	217.7	196.7	211.5	278.5	170.4	83.94	55.64	43.37	28.04	20.28	15.81	14.54	57.81	2172
					450.5	340.1	340.5	360.3	375.1	312	335	333.9	349.4	399.6	355.3	362.6	349.8	309.9	248.6	207.6	199.8	196.5	207.7	205.2	221	242.8	236.6	250.9	244.7	236.2	221.2	233.9	201.2	185	269	202.1	89.34	53.5	38.24	31.21	20.91	14.81	13.55	19.71	601.6
					478.9	295.9	311.3	364.5	361.5	359.4	325.7	338.8	385.2	377.1	369.1	366.6	310.1	285.1	224	210	190.8	198.6	190.8	206.4	222.2	225.2	234.1	244.1	233.1	240.7	224.8	220.7	197.7	173.5	215.9	222.3	103.4	52.67	42.3	31.56	20.78	16.79	13.85	11.13	115.2
						371.8	348.7	370	380.9	357.4	331.5	354.5	369.7	367	389.3	351.9	287.7	271.3	226.7	206.6	193.4	183.9	185.8	200.1	200.5	210.4	231.1	226.9	230.5	226.9	226.5	217.7	198.2	164.6	183.4	234.2	126.7	63.6	42.65	31.08	22.87	16.57	12.77	9.403	27.58	1201
						346.9	357.2	333.8	395.4	338.9	338	338.8	380.9	380.5	386.8	323.1	289.3	264.5	218.8	207.5	181.1	194.9	187.6	185	199.9	218	219	228.6	225.5	230.8	228.4	208.8	191.7	167.7	164.1	220.8	159.7	70.89	44.4	30.71	23.76	17.12	13.68	11.77	13.37	272.5
						369.3	319.6	317	360.6	304.9	302.4	306.3	336.6	367.8	368.7	353.2	291.1	265.9	198	194.5	183.7	173.7	182.9	177.5	195.3	198.5	217.3	219.7	226.7	223.1	221	208.7	189.1	165.6	140.8	185.6	183.8	86.66	45.65	33.54	23.11	18.15	11.54	10.66	10.39	50.5
							298.4	326.3	367.6	326.2	337.1	337.7	331.7	309.3	373.3	348	282.1	246.6	206.5	188.1	168.7	174.3	171.3	179.5	201	200.2	212.1	217.1	216.1	217.6	216.9	200.4	185.5	166.5	142.8	156.8	202.4	99.29	45.17	34.5	23.63	20.61	14.88	10.53	9.336	16.09	578.8
							314.5	327.2	310.1	322.9	299.2	313.7	377.8	339.1	358.2	331.2	268.3	237.8	203.2	187	167.3	173.4	170.4	171.9	186.3	200.8	212.2	211.1	207.6	211	214.7	201.1	178.5	160.4	131.9	127.5	187.9	121.7	47.79	32.61	26.92	18.78	16.23	10.52	9.031	9.013	112.8
							349.4	337.9	340	309.9	323.1	298.2	353.9	318.5	338.7	330.7	286.2	245.9	184.7	172.2	163.8	154.7	167.5	165.9	179.1	183.8	195.4	204.3	207.1	211.7	201.6	196.1	179	161.6	129.5	119.8	164.2	142.8	60.16	32.18	24.11	19.89	16.14	11.7	7.872	8.279	24.43	1056
							294.8	343.3	311.9	268.8	307.9	316.5	318.2	316.8	309.1	295.8	271.4	229.5	194.3	169	155.2	152.8	157.2	152.9	171.1	178.7	182	188.4	199.7	202.3	194.4	193.1	177	152.9	138.2	106.6	133.8	154.7	75.3	40.9	25.06	21.75	16.2	12.78	9.982	7.758	12.1	239.4
							357.3	309.7	286.1	282.5	271	282.7	323.5	307.5	325.4	304	257.2	210.2	191.5	158	166.6	149.4	152.9	159.4	168.6	175	178.2	197.2	192.9	192.2	194.8	182.5	184	154	133.6	111.3	111.7	150.8	93.82	43.65	26.74	22.78	17.34	13.51	9.897	8.784	7.937	45.1	1977
							335.3	319.6	335.1	274.6	275.2	286.3	309.2	320.6	329	296.9	248.8	199.5	176.8	157.8	147.6	142.3	146.6	147.3	160.6	171.6	171	183.7	180.5	190.6	189.2	178.4	171	152.5	124.8	102.7	97.03	145.8	113.5	46.77	31.6	21.8	16.45	13.53	8.803	8.258	6.972	12.94	585.4
								284.8	307.7	261.9	293.3	289.1	285	326.7	326.2	282.5	239.4	192.2	169.2	155.2	142.5	130.9	141.1	155.5	156.4	159.9	166.5	179.9	181.1	180.9	180.2	169.5	166.9	147.3	128.3	104.6	90.98	119.4	135.1	55.33	31.77	22.06	16.62	13.26	10.61	8.289	8.159	9.115	116.1
								301.2	329.7	297	275.9	299.3	289.3	315.2	294.7	280.6	225.6	203.9	175.1	141.1	141.9	126.6	123.8	144.7	144.5	160.3	167.4	166.2	172.4	179	175.1	165.9	162.5	140.5	124.7	96.24	83.24	89.22	139.2	74.58	32.73	20.73	18.19	11.89	10.83	8.39	6.598	7.657	25.77
								231.5	248.8	270.2	287.2	290.8	296.6	277.7	281.5	261.6	229.7	191.5	160.2	133	142.1	126.7	129	136.8	138.6	144.8	163.2	166.3	161.1	165.4	167.5	172.3	165.2	144	113.4	104	86.08	79.39	124.8	98.91	38.08	24.42	16.97	13.46	10.61	8.224	5.962	5.982	10.64
								283.9	251	239.2	257.8	289.9	272.7	291.7	272.8	252.1	210.7	192.8	151.7	134.2	128.8	122.4	130.2	134.2	128.1	141	147.4	162.2	159.3	171.5	168.3	157.9	150.8	140.3	112.3	101.3	86.15	67.53	103.7	107.2	44.43	24.27	18.93	14.04	10	8.456	7.221	7.419	8.509
								279.4	248.8	275.6	256.3	265.2	299.8	305.1	301.9	271.7	215.6	182.4	156	122.6	133.4	123	123.4	122.8	129.6	134.9	145.6	145.1	160.4	157.5	166	153.6	151.5	137.1	114	98.29	81.17	67.61	81.5	107.2	54.17	25.14	19.33	17.88	11.52	11	6.869	7.04	7.546
									308.7	241	266.1	261.3	301.3	281.1	267.4	227.3	210.9	176.8	142	122	117.2	121.2	118.4	118	129.2	131.3	142.8	141.4	155.1	156.9	155.6	153.3	137.7	128.5	112.6	93.69	82.19	64.62	61.55	104.9	74.7	27.8	20.76	16.73	12.79	10.85	10.17	7.062	6.626
									269.4	231.1	274.7	262.5	308.3	265.5	277.1	250.3	198.5	175.8	132	114.7	102.6	111.8	116.4	114.3	117.7	131	119.9	140.7	149	151.5	153	135.5	144	128.4	105.2	93.33	75.79	65.03	49.67	94.43	82.83	32.9	21.92	16.58	11.41	9.665	8.655	8.572	6.802
									252.5	250.6	270.9	274.1	281.4	264	269.7	238.5	195	153.7	131.6	116	107.5	105.8	105.5	92.49	112.2	127.8	122.4	130.5	142.7	146.8	136.4	132.8	135	118	102.5	95.43	76.67	65.04	54.9	75.58	88.26	43.14	22.71	15.81	14.07	11.84	9.717	8.53	8.166
										237.1	242.6	244.1	274.7	259.1	268.2	216.7	187.6	151.3	127.2	107.9	109.4	104.3	103.7	101.1	111.5	119.1	121.4	126.4	129.8	136.1	130.7	128.3	129.2	122.3	110.1	87.84	72.8	63.84	50.01	60.92	91.8	59.89	26.61	19.32	14.57	10.6	10.84	9.282	7.286
										231.9	279.9	242.4	279.5	270.8	266.9	230.5	174.1	150.3	112.8	93.88	94.51	100.3	102	102.5	109.8	102.3	117.2	123	128.7	136.2	136.8	122.1	123.7	112.1	103	83.49	76.91	61.08	51.94	54.09	83.62	69.49	28.26	19.36	14.91	12.86	12.67	9.386	6.764
										236.6	252.1	242.1	254.1	252.5	235.6	220.5	197.4	128	113.4	98.81	83.87	90.42	96.65	91.32	108.7	106.8	116.4	127.6	115.4	124.2	131.8	118.2	119.2	114	95.98	82.98	75.05	54.79	54.11	47.29	65.54	76.47	38.49	20.2	15.94	15.06	11.41	10.27	9.683
										221.9	222.5	252.3	233.6	233	230.9	236.1	166.7	141.6	108	99.52	95.61	86.26	94.51	95.06	94.15	102.3	105.5	117.6	114.2	121.9	113.4	124.6	114.9	105.9	99.06	87.73	74.38	61.68	49.93	42.06	59.03	80.61	46.68	21.73	17.58	15.79	11.88	10.53	9.19
										241.4	235	231.1	229.5	224.2	230.3	216.4	175.8	134.6	115.8	98.87	84.29	83.96	85.44	80.52	99.19	102.6	99.24	109.2	117.8	116.6	114.1	113.4	116.2	102.8	94.17	81.94	73.03	53.78	49.38	38.85	49.98	79.43	57.24	25.87	17.16	15.15	13.58	10.21	10.91
											228.2	228	254.6	222.2	221.7	224	156.6	148.4	102.7	93.17	94.97	80.4	84.49	78.17	90.69	89.18	92.71	104.8	111.7	110	108.3	112.8	108.2	101.1	89.1	73.92	72.31	57.3	45.95	41.36	42.55	65.82	70.91	30.1	18.5	15.6	13.44	10.19	11.92
											232	223.4	253.3	249.2	218.8	204.4	150.7	129.6	101.6	90.94	83.58	76.71	77.16	80.27	88.99	87.62	91.97	99.92	94	102.9	107.4	107.8	102.1	101.4	87.67	76.18	67.22	56.58	46.52	40.83	39.2	57.61	71.35	40.17	21.82	17.13	14.09	12.2	12.01
											247.1	239.6	208.7	220.8	217.4	209.3	158.3	119.8	96.39	81.3	77.86	69.5	75.29	79.46	75.62	79.47	86.97	92.58	94.03	94.09	101.3	98.49	102.7	99.38	86.24	76.43	67.14	56.08	54.39	37.57	37.45	40.95	67.91	46.44	23.48	18.05	14.09	13.17	12.4
											215	231	229.9	230.5	218.4	195	155.5	126.6	94.73	80.92	70.63	63.99	70.41	73.7	73.13	82.06	88.91	94.86	93.1	95.91	98.92	92.91	93.75	88.14	77.32	73.06	68.76	55.68	53	40.44	35.55	40.11	64.36	57.99	26.48	18.56	16	15.66	11.93
											217.2	221.4	222.3	230.5	224.8	199.3	147.6	122.2	84.76	78.94	69.87	65.72	65.76	69.57	74.8	72.23	78.78	81.88	86.82	97.27	94.3	96.4	94.78	83.84	81.78	69.1	66.26	56.45	49.66	39.49	32.29	32.17	52.38	60.54	32.41	19.8	16.85	14.58	13.41
											193	217.6	241.5	219.1	213.9	186	147.3	115.4	86.08	73.54	66.68	65.39	77.86	68.69	64.1	76.55	77.52	85.72	88.44	94.36	86.43	97.68	96.39	84.72	78.34	65.94	65.17	51.57	45.73	44.77	37.8	34.1	45.37	65.68	41.05	20.49	17.27	15.97	12.25
												241.2	229.4	221	212.4	191.4	124.6	103.1	87.15	68.62	67.73	58.82	67.97	67.57	64.43	70.81	76.37	81.34	79.12	88.3	82.38	88.92	90.84	76.81	75.47	63.39	60.09	51.55	45.83	42.4	35.18	32.6	36.97	59.85	47.57	22.12	17.55	17.04	12.62
												224.7	215.8	232.1	183.6	180.1	134.1	104.1	77.1	64.41	60.88	59.69	62.05	59.01	66.74	67.06	79.1	77.58	78.66	81.09	83.29	81.82	82.28	84.69	69.7	60.95	58.27	55.25	45.77	42.67	35.01	32.66	32.29	52.3	52.94	27.24	17.99	16.98	15.05
												208.4	212.6	218.9	197.6	185.8	131.5	105.6	78.54	72.14	59.04	59.93	54.99	58.91	63.69	65.95	63.92	70.23	82.93	77.52	80.49	76.28	81.31	80.11	73.91	66.31	60.83	53.09	45.28	43.75	38.29	33.86	30.9	41.62	55.64	37.1	19.64	16.24	13.82
												204.7	212.7	206.9	194.3	161.6	136.7	104.4	79.33	66.58	64	57.86	55.05	56.44	56.14	56.55	67.62	71.35	74.05	79.85	77.82	76.64	75.45	70.16	70.62	57.22	53.02	49.33	44.03	42.42	38.05	31.66	27.26	34.07	55.82	42.65	18.96	16.67	13.28
												218.2	207.2	196.7	190.1	172.4	130.3	100.1	81.28	63.53	59.58	57.38	51.34	52.39	56.2	57.87	60.55	68.52	61.73	71.58	76.54	75.19	73.36	69.87	65.95	62.1	55.53	50	44.31	41.86	35.44	32.79	25.12	32.47	50.93	47.4	23.27	17.33	14.64
												210.8	199.2	191.5	200.3	148.1	115.5	85.22	68.89	65.83	50.79	52.69	48.9	50.51	55.33	58.21	52.65	62.39	63.59	75.66	68.19	69.67	73.27	64.28	61.4	59.79	60.9	45.14	45.65	38.73	38.12	30.95	31.95	28.72	44.43	50.44	30.51	18.1	16.38
													208.9	185.3	213.5	154.9	124.7	92.92	65.18	57.18	51.98	51.45	48.29	50.58	52.87	61.3	52.74	53.51	60.88	61.27	71.23	71.05	71.88	61.8	57.79	54.23	54.45	48.86	38.47	33.6	36.88	33.15	30.08	26.37	32.46	50.44	34.98	18.19	15.54
													187.1	198.2	171.3	161.6	118.7	83.19	68.19	51.11	48.37	48.43	50.66	49.66	50.34	47.83	50.27	56.55	55.79	54.7	63.76	64.55	66.35	65.62	54.81	52.55	54.23	47.14	33.44	37.92	33.21	29.28	29.67	26.78	28.27	48.59	42.2	22.18	15.55
													168.8	177.8	161.8	146.1	114	92.65	64.68	46.32	45.73	46.41	42.7	44.56	47.34	50.8	50.19	57.74	51.46	55.98	57.28	62.25	62.31	61.89	54.11	51.81	47.18	42.81	39.28	37.92	35.53	27.92	28.37	25.2	26.41	40.73	44.33	25.04	16.68
													190.4	180.1	172.1	146.6	117.2	83.78	66.76	50.59	46.65	41.76	40.99	45.58	44.65	45.97	45.86	51.41	53.97	51.51	55.74	59.31	66.06	59.81	51.72	50.23	45.01	38.18	35.45	35.94	34.69	30.39	27.8	28.95	24.42	34.29	47.86	28.29	16.87
													180.3	176.4	169.4	146.3	113.7	84.68	57.11	47.97	48.8	36.25	42.17	37.05	41.94	49.46	47.53	50.6	47.2	52.78	58.42	53.48	57.54	51.89	53.28	45.75	41.99	33.91	35.83	34.49	32.99	27.45	29.08	27.66	25.87	27.14	44.91	32.97	17.9
														176.7	157.9	121.7	107.5	74.94	57.77	46.93	45.18	39.4	38.55	37.44	41.08	42.34	46.23	42.15	47.75	54.02	55.12	48.36	58.07	54.58	46.84	47.04	40.6	38.93	35.62	32.79	31.06	31.38	26.54	26	24.58	24.29	39.23	37.19	20.1
														165.9	160.2	112.1	108.4	77.72	57.53	45.86	42.65	40.69	41.92	37.84	36.33	37.39	43.65	46.6	43.14	48.23	48.88	49.3	49	47.12	41.51	43.16	39.73	34.82	32.89	31.65	31.28	29.29	27.47	24.83	23.8	20.61	31.93	38.39	22.02
														166.4	162.9	120.7	98.89	73.87	55.46	41.93	43.38	36.34	31.11	36.01	37.12	36.83	45.68	46.27	45.75	43.35	49.35	55.63	40.45	42.88	45.8	37.26	36.56	34.56	33.91	33.98	26.32	28.69	25.79	23.81	23.26	20.65	26.08	40.33	25.15
														151.7	139	126.9	95.62	68.3	45.4	36.59	37.03	32.41	34.78	33.38	32.92	38.67	36.81	38.59	39.66	42.14	47.56	45.02	38.52	43.57	40.37	41.41	35.46	34.15	29.74	31	29.14	26.67	27.29	25.64	21.94	20.95	22.39	36.73	28.23
														159.7	135.9	127.3	94.37	62.94	48.73	45.95	38.45	30.75	34.44	33.47	31.62	37.03	38.27	34.58	41.41	41.27	41.92	40.41	43.15	41.12	42.02	36.77	32.1	30.09	32.38	29.01	28.09	26.11	24.83	26.15	21.92	19.21	20.47	30.44	32.41
														224.8	143.9	114.1	97.71	59.74	49.33	39.29	32.7	34.41	32.31	31.82	31.65	31.94	34.49	37.33	38.38	44.42	39.88	41.82	40.95	40.22	39.14	36.76	33.83	31.98	31.8	29.07	25.99	26.01	23.29	22.34	18.77	21.32	17.54	25.32	31.66
														543.6	130.4	112.1	86.3	57.97	43.24	36.69	33.33	31.88	31.75	29.12	29.64	28.7	35.15	36.62	34.12	35.89	39.06	38.7	41.17	41.22	36.4	35.39	34.74	31.4	29.09	26.78	25.03	23.3	22.86	21.07	18.3	20.66	18.51	22.16	26.46
															139.2	104.8	88.46	63.8	37.61	37.16	32.41	28.27	28.27	30.86	29.03	33.57	32.77	35.93	37.03	40.82	39.65	36.68	37.08	36.82	37.87	32.3	30.82	29.09	27.06	27.05	24.54	23.96	23.64	22.86	18.86	18.41	17.58	17.35	26.35
															133	108.4	84.43	61.9	36.36	35.4	30.28	31.19	28.4	29.79	25.7	30.03	29.74	28.53	32.13	34.32	33.78	34.55	35	37.45	34.25	29.6	29.48	32.35	26.87	26.02	22.89	22.89	23.09	19.63	20.24	17.95	17.76	16.3	21.88
															140.7	98.1	78.78	58.45	37.68	29.41	27.41	29.57	25.09	29.03	24.72	27.34	30.6	29.35	32.79	29.02	33.55	35.93	35.12	35.54	29.67	30.17	29.07	29.79	26.03	27.55	22.52	23.61	22.62	19	18.06	17.66	16.93	15.15	17.26
															165	105.9	76.42	53.24	40.68	29.21	27.26	27.14	25.61	27.16	25.16	27.15	25.74	26.16	26.92	31.19	31.21	32.65	33.84	32.48	28.18	29.62	27.49	26.07	25.21	23.63	23.03	23.7	20.42	20.54	18.31	17.61	16.09	15.72	15.63
															398.3	104.6	72.07	51.25	39.87	29.44	26.45	23.78	24.35	21.57	26.19	24.68	26.44	27.64	27.02	28.18	30.23	29.19	32.42	27.4	28.88	25.57	27.01	25.42	26.13	20.76	21.05	20.01	19.78	20.68	18.06	15.75	15.47	15.98	12.46
															1130	92.99	79.03	43.17	40.04	28.33	25.79	24.47	20.91	19.04	25.1	25.31	24.9	27.05	27.35	27.68	28.17	31.74	27.87	28.43	27.25	28.45	26.72	27.03	23.7	23.39	21.75	21.3	19.7	19.83	17.48	15.29	15.22	12.59	11.38
															2511	94.78	64.21	45.93	33.17	24.04	23.75	19.21	19.49	24.54	17.56	21.22	22.11	22.69	26.83	27.85	29.36	29.86	25.79	29.64	27.14	26.37	24.23	23.41	24.28	19.91	19.18	17.71	19.19	19.89	17.66	16.94	15.05	13.48	11.8
															4560	103.2	68.51	48.76	36.22	26.66	24.4	21.29	23.19	19.29	18.31	19.33	22.82	23.68	26.88	24.48	26.53	28.14	27.82	26.66	23.11	22.03	22.31	21	22.32	21.13	18.27	19.63	18.19	16.46	16.13	15.99	14.93	13.09	10.7
															6788	128.8	63.76	52.39	29.19	24.56	22.31	21.77	17.89	17.85	17.48	23.47	21.87	21.96	24.78	22.35	24.85	26.1	27.65	25.7	23.53	25.05	20.38	19.95	20.47	19.25	18.72	17.85	17.4	16.94	15.49	13.45	14.43	11.26	10.35
															8571	304.8	53.78	44.6	36.54	26.33	19.11	21.16	18.22	21.04	17.92	19.27	22.54	23.32	21.87	20.15	21.73	21.96	24.87	23.8	22.31	22.45	21.35	21.19	19.38	17.8	19.29	17.66	16.96	16.88	14.85	14.21	13.09	10.9	12.07
																829.9	62.8	42.53	30.85	23.77	19.87	18.72	15.08	17.32	20.23	20.57	17.8	23.59	19.51	22.05	25.41	20.85	23.69	22.24	19.79	20.26	21.77	20.3	16.43	18.2	19.04	14.08	14.2	15.82	14.68	13.31	12.76	11.53	9.658
																	54.45	39.1	29.79	28.72	19.28	18.03	15.61	16.67	20.61	20.51	19.03	19.45	16.44	18.28	21.47	23.01	21.23	20.1	20.75	16.35	21.66	20.36	15.21	17.3	15.88	17.3	15.32	15.45	13.17	11.48	11.06	10.46	9.559
																	59.42	36.65	30.17	23.82	14.04	16.82	14.79	15.72	15.94	18.77	16.06	18.51	19.35	18.24	20.09	21.27	19.34	18.87	19.09	17.21	19.68	17.33	17.33	16.64	14.85	16.24	16.11	13.22	10.66	13.01	10.23	10.19	8.092
																	85.05	34.03	25.76	20.8	14.53	14.05	13.7	13.31	15.7	16.31	18.49	19.07	18.87	17.73	20.43	20.89	18.27	16.23	16.95	17.7	15.66	15.69	15.22	15.59	12.5	14.22	13.91	14.47	13.07	11.25	11.72	10.9	8.153
																	207.1	34.45	29.81	16.18	13.05	16.71	13.34	14.17	13.43	16.58	15.34	16.59	15.85	15.34	15.51	14.91	18.21	19.2	18.83	17.94	15.19	17.85	16.03	15	15.06	13.28	15.72	11.97	13.93	9.28	10.83	8.83	7.127
																	558.4	34.6	21.13	18.22	15.58	13.87	19.59	13.75	13.78	14.29	19.02	15.41	16.83	16.79	16.46	17.53	19.32	17.28	14.05	16.59	16.02	12.73	13.1	14.98	16.03	13.28	12.64	11.58	11.12	9.99	9.24	8.435	7.327
																	1247	31.34	26.96	19.55	15.11	13.14	13.52	16.1	9.969	12.51	13.74	12.8	20.04	15.01	17.89	16.72	17.06	15.52	14.05	17.56	15.12	13.76	12.96	12.23	12.12	12.27	10.53	11.03	11.4	8.413	10.05	8.621	7.367
																	2241	37.43	22.99	14.01	14.68	11.26	12.49	14.34	11.23	13.03	12.25	13.18	15.75	14.13	14.16	15.28	14.54	16.43	15.42	16.83	11.59	13.28	13.29	13.14	10.73	11.17	11.68	11.48	10.54	8.746	10.22	6.831	8.187
																		59	23.49	15.46	19.63	12.13	12.28	14.84	12.03	11.18	12.04	11.74	14.12	16.58	13.03	15.03	13.15	14.68	15.41	12.25	15.13	12.5	11.98	12.73	12.14	11.56	11.06	10.06	8.979	8.862	8.28	7.982	7.374
																		153.9	22.58	18.45	14.06	14.1	14.49	11.45	12.07	12.16	11.57	15.08	12.15	14.18	14.86	13.73	12.49	13.16	12.36	13.38	12.99	13.12	12.25	10.77	10.84	10.76	11.76	11.49	9.123	8.623	9.161	6.433	5.617
																		400.4	23.58	15.43	16.59	10.89	13.16	10.66	12.08	11.66	12.42	13.05	9.806	13.15	12.36	12.57	13.38	14.42	15.65	10.85	10.34	13.25	9.478	10.23	10.35	11.08	10.19	10.52	9.238	8.461	7.139	6.445	5.585
																		885.6	26.89	15.82	14.88	10.22	11.23	9.46	11.54	11.25	12.17	11.39	10.77	12.92	11.58	12.01	11.98	12.05	14.25	11.42	12.46	11.03	11.55	9.613	8.57	9.275	9.651	9.383	8.356	8.036	5.947	7.166	5.837
																		1689	21.8	13.79	13.72	12.38	12.31	10.48	11.49	10.33	12.9	10.27	10.43	9.803	10.97	11.37	12.95	13.45	11.22	10.06	11.37	9.35	9.375	9.357	8.576	8.907	9.73	8.36	7.289	8.629	7.88	6.864	4.593
																		2593	43.73	14.89	13.4	11.94	10.96	11.38	10.71	9.483	11.33	11.76	11.06	11.22	13.79	9.758	12.59	11.1	10.93	9.357	11.42	10.19	9.731	9.737	8.265	7.68	7.737	9.403	6.768	9.152	6.789	5.544	7.241
																		3429	122.9	13	12.48	11.05	8.595	12.7	9.348	10.54	9.199	10.31	11.39	10.85	8.77	9.811	11.28	10.82	9.219	9.745	11.71	8.862	10.01	8.334	8.388	8.403	7.387	7.961	6.958	7.725	5.68	6.44	5.502
																			341.5	14.83	11.75	8.904	11.53	7.482	10.5	11.27	8.575	10.53	10.21	8.812	9.069	11.59	9.352	11.43	7.677	9.735	8.612	8.858	8.317	9.743	7.543	7.817	8.102	7.425	7.519	7.516	4.97	6.071	5.715
																			709.9	15.45	13.35	9.699	9.924	10.82	10.17	8.862	7.801	6.53	7.994	11.89	10.74	9.719	10.26	6.756	8.776	9.162	8.732	8.011	8.802	7.617	6.474	7.109	7.767	5.996	7.136	7.27	5.51	5.573	4.379
																				18.25	11.14	8.322	8.907	9.852	6.774	11.45	8.011	9.439	9.022	9.949	8.545	9.786	8.073	7.54	8.202	8.365	6.773	6.767	7.168	8.27	7.896	6.858	7.449	4.709	6.783	6.469	5.553	4.318	4.081
																				34.59	11.82	8.13	10.34	7.988	7.786	9.339	9.597	8.868	7.813	7.531	6.154	8.307	9.741	8.473	8.12	7.261	8.267	8.056	7.203	6.94	5.601	6.047	7.445	5.632	6.229	6.937	5.446	4.198	3.365
																				92.26	15.08	8.888	10.85	10.46	9.822	8.206	8.328	6.979	6.72	9.113	8.127	8.414	7.15	7.149	8.125	6.919	6.336	8.363	6.575	7.844	6.891	7.425	5.386	5.822	7.094	6.132	5.456	4.695	3.222
																				236.8	12.36	10.34	8.415	7.438	8.37	7.172	7.696	8.013	6.898	8.592	9.888	7.538	9.392	7.787	5.634	6.927	7.159	7.213	6.826	6.073	7.049	5.083	5.645	6.26	5.907	4.712	4.733	4.356	4.371
																					12.77	10.47	7.129	8.896	9.455	7.559	7.897	8.001	6.598	7.479	7.493	5.468	6.445	7.011	6.492	6.541	7.679	6.144	5.842	5.74	6.758	5.394	6.209	4.869	5.546	4.791	4.291	4.344	5.024
																					12.96	12.29	8.787	7.77	6.976	7.784	6.163	7.719	5.682	7.397	7.554	6.144	6.381	7.034	7.347	7.524	6.946	4.601	7.235	7.129	6.167	5.565	4.961	5.191	5.037	4.841	3.91	4.388	2.762
																					23.74	8.955	6.993	7.179	8.405	5.737	6.653	7.448	5.955	5.628	5.535	6.349	6.636	6.421	6.646	5.421	6.294	7.638	5.364	4.614	5.087	4.785	4.066	4.125	3.221	5.62	3.658	3.129	2.277
																					66.95	7.611	4.882	9.421	6.387	4.385	6.737	4.998	6.118	5.312	7.605	6.301	6.253	5.955	3.786	5.528	5.277	4.226	5.656	4.655	3.876	5.741	4.297	4.457	4.33	3.297	4.308	3.613	3.328
																					203.5	8.946	7.117	7.581	6.827	5.742	6.05	5.147	6.311	6.234	6.424	5.625	5.861	5.319	4.671	4.238	4.161	5.277	4.007	5.375	5.283	4.841	3.532	3.9	3.256	4.048	4.146	3.755	2.149
[truncated: 1 more columns]
