# Supplementary material for: Utilization and transformation of Chrysotila dentata-derived dissolved organic matter by phycosphere bacteria Marinobacter hydrocarbonoclasticus and Bacillus firmus
Source: PeerJ. 2024 Jan 4;12:e16552. doi: 10.7717/peerj.16552 (PMC10771764; doi:10.7717/peerj.16552)
Supplement: Supplemental Information 6 [file peerj-12-16552-s006.xlsx]

## Sheet: Sheet1
61.55	69.11	125.5	126.5
60.88	22.79	136	249.4	387.6
13.32	75.72	145.4	356	174.2
67.64	16.95	57.15	343.4	476.1
27.16	39.08	130.2	192.9	541.5	415.8
41.46	77.34	88.64	274.8	575.9	359.4
91.5	81.79	124	170.1	577.6	530.5	819.5
49.02	65.72	128.1	158	582.4	596.4	324.6
26.42	71.32	126	68.32	244.2	938.4	383
76.46	58.52	116	85.44	211.9	654.6	591.7	472.3
78.86	115.9	162.1	40.03	86.94	476.5	747.9	245.4
66.32	90.04	87.24	134.9	164.1	293.4	1021	385.8
251	109.5	139.6	70.87	128.3	154.9	765.7	585.2	286
102.5	129.6	90.59	180.3	171.5	73.78	524.4	1008	309
223.2	125.9	97.17	240.2	150.3	120.1	269.7	1083	443.2
165.6	127	104.5	182.9	148.9	101.9	141.8	876.2	736.7	238.4
171.9	116.2	246.4	191.1	177.8	126.8	84.53	525.3	1162	288.8
154.7	192	183	205.3	79.08	135.8	88.24	276.9	1101	537.5
140.9	220.6	207.9	98.69	195.8	102.8	87.54	131	832.5	868	214.5
145.3	182	99.86	158.7	152.2	80.27	69.96	89.22	461.3	1165	312.1	551
272	143.9	103.1	199	147.5	128.9	72.98	86.14	228.7	1180	557.3	223.6
167.4	259.6	154	208.3	161.4	225.2	80.82	92.47	137.3	922.4	943.5	226.7
162.3	145.5	210.7	331.2	231.7	228.5	141.4	55.36	113.9	557.5	1337	339.8
120.7	181	98.23	350.6	469.8	217.5	117.3	79.9	74.41	275.3	1339	665	217.6
169.1	178.7	150	323.3	605	385	144.3	69.92	60.97	136.8	1013	1100	213.7	691.6
248.9	216.1	219.7	400.6	689.4	406.9	194.9	58.09	73.63	111.6	622	1489	457	282.5
387	231.6	227.3	382.7	729.5	480.5	164.9	109.1	65.34	92.5	320.6	1525	802.6	241.1	1644
264	296.8	379.2	520.1	809.4	598.8	235.5	128.9	91.25	75.9	159.9	1155	1316	304.1	493.5
190.7	207.3	362.4	466.8	956.2	536.5	274.7	123.6	96.45	101.7	144.8	666.8	1690	499.2	335
225.9	261.9	439.6	691	984.9	718.1	365.5	149.5	113.8	122.2	140.4	367.4	1732	893.9	329.1
259.7	235.1	350.1	537.5	985	872	401.6	177.1	111	134.8	147.3	274.5	1348	1509	438.2	461.8
215.7	156.9	313.3	616.6	960.2	965.8	444.2	190.7	143.9	124.8	182.4	255.3	869.1	1993	661.1	443.1
376.6	233.1	360.5	514.6	1157	906.8	497.2	231.6	139.9	173	198.4	274.4	585.2	1982	1123	495.4	588.8
231.8	253.1	267.9	534.2	900	999.5	553.4	208.3	168.1	193	242.8	333.1	466	1701	1712	572.9	461.9
375.6	250.1	330.2	645.2	1083	1018	559.7	268.7	186.6	202	253.5	341.7	425.7	1187	2254	826.2	459.9
381.2	126.3	395.6	670.7	957.2	1070	571.3	312.3	232	236.9	312.8	365.3	483.7	876.8	2308	1195	512.9	410.6
141.5	171.1	211.6	595.6	998.2	1222	655.4	410.1	216.1	263.3	341.4	442.2	548.9	749.4	1907	1858	591.8	350.6
160.9	188.7	289.2	752	929.5	992	599.7	317.1	303.6	281.9	386.2	479.7	597.6	709.7	1446	2321	748.5	341.7	372.8
199.5	291.9	289.9	583.6	1063	926.7	621.9	396.1	331.6	304.4	406.4	540.4	613.9	747	1077	2372	1155	379.3	252.9
193.1	191.6	271.1	500.9	904.4	967.4	665.3	387	346.6	346.2	399.1	582.8	714.5	809.8	954.3	2031	1665	452.5	247.6
142.6	234.7	309.5	488.2	758.5	849.3	671.8	387.3	310.1	355.5	539.7	615.9	717.1	852.7	941.3	1535	2140	619.4	245	203.9
300.4	199.6	374.4	491.3	998.8	931.4	632.8	431.4	365.6	386.9	564.7	678.5	805	956	1013	1208	2220	926.1	272	177.3	719.8
248.1	182.2	187.5	557.9	839.7	919.9	662.7	410.9	443.3	448.5	580	729.1	892.4	1017	1055	1083	1937	1406	312.2	170.8	211.8
178.2	229.6	126.5	574.4	878.3	930.1	720.8	433.7	409.3	447.8	537.7	768.8	955.9	1128	1137	1049	1490	1773	452.8	194.4	133.9
238.4	116.9	350	663.1	1100	1062	683.5	437.3	404.4	476.3	642.1	848.6	1011	1171	1165	1064	1135	1944	726	194	134.4	305.4
291.1	281.6	392.6	541.5	1154	1205	685.3	470	454.3	513.3	636.4	875.7	1011	1203	1189	1092	988	1689	1140	225.4	129	129.8
197.1	347.7	303.8	665.5	1227	1205	761.6	507.9	470.4	571.4	658.7	869.7	1062	1212	1229	1137	946	1267	1535	334.5	143.9	110.6
247.2	205.2	194.1	750.1	1195	1059	781.8	539.4	454.5	570.1	730.8	929.5	1051	1287	1324	1219	931	925.8	1618	569.1	152.5	114	162.7
190.2	137.2	301.5	744.7	1338	1065	803.4	560.7	436.3	541.8	703.8	894.8	1094	1288	1275	1242	946	766.6	1401	925	186.5	108.3	103.6
115.6	267.3	301.1	724.6	1410	1166	833	472.7	520.4	531.6	729.9	905.8	1091	1235	1266	1195	977.1	704	1045	1249	274.5	111.1	89.58	239.2
207.8	231.5	267.4	735.9	1485	1108	797.5	544.2	501.4	523.2	665.5	883.9	1054	1227	1271	1150	939.1	725.3	732.7	1322	468.6	115.2	95.18	106.2
177	137.4	261.5	611.9	1248	1097	745.1	515.9	531.6	569.7	700.3	845.3	1115	1217	1268	1166	936.3	716.6	587.2	1128	754.4	145	84.54	88.83	407.9
133.2	132.4	210.8	721.6	1250	1233	759.1	582.4	512.6	549.1	677.8	856.9	1049	1277	1267	1144	965.3	738.1	523.4	801.4	1031	202.8	86.53	80.7	128
179.7	119	230.3	705.4	1177	1177	734.2	575.7	534.9	542.3	691.6	728.6	980.5	1212	1261	1172	954.3	736.6	503.3	546.7	1116	396	101.6	88.24	82.49	795.9
207.3	65.39	287.5	976.9	1148	1153	713.9	619.1	496.3	558.4	619.4	781.4	1014	1144	1217	1142	934.3	711.4	507.7	397.5	976.4	624.3	129.7	93.04	90.65	189.6
198.8	123.2	257.6	593.4	1337	1166	733.9	572.2	474.2	524.1	651.1	771.4	982.4	1058	1160	1133	947.3	727.8	529.1	340.1	697.1	869.9	188.7	107.9	89.61	83.96
127.6	68.39	157.3	615.7	1094	1129	797.5	489.4	472.8	541	567.3	760.6	966.3	1109	1117	1092	885	722.8	519.4	343.1	481.5	949.3	320.4	117.4	93.28	87.48	305
82.42	126.3	131.8	522.1	1134	961	779.9	564	489.1	524	537.2	736.4	870.9	1031	1100	1041	901.5	723.1	527.2	351.6	324.6	897	524.4	128.7	97.39	91.05	116.5
165.5	121.9	120.8	547.5	1136	979.1	722.1	496.5	495.2	486.2	519.2	716.1	799.7	989.1	1103	972.1	840.8	682.8	522.1	359	285.1	675.2	775.4	192.7	123.9	100.7	89.78	506
293.2	128.4	176.8	539.4	1075	915	792.2	545.5	457.8	453.4	513.5	672.3	839.6	941.4	1019	985.4	855	694	541	353	273.6	439.9	859.4	313.4	133.5	102.6	81.68	135.6	3705
193.8	163.8	82.63	675.3	1018	889.1	659.1	543.6	422.7	452.7	513.2	673.3	760.2	908.1	965	955.4	834.1	691.8	517.8	362.3	287	318.7	816	465.3	149.2	113.5	91.1	84.21	934.2
161.5	199.9	64.81	467.5	1028	848.1	604.6	467	422.4	439.3	562.1	655.7	776.1	871	933.7	936.1	778	677.1	549.5	351.6	280.1	272.5	652.2	682.1	196.9	132.7	101.4	79.65	203.7
169.7	123.4	130.3	454.2	799.5	891.3	674.8	529.8	439.6	415.4	507.8	645.5	716.6	849.8	908	898.2	784.9	670.1	519.6	366.6	295.9	240.3	449.3	776.6	303.7	134	103.1	88.95	87.37	1609
114.5	144.6	149.6	385.2	956	856.3	653.4	537.7	430	437.9	469.4	589.3	722.1	865.5	888.1	869.4	775.3	673.4	521.8	368.8	296.9	257	327.1	782.9	436.7	159.5	120.7	81.49	69.92	339.8
134.3	99.71	189.7	412.5	773.4	908.2	701.7	460.7	413.9	442.4	492.8	577.6	661.7	810.7	871.5	844.4	740.3	654.1	497.1	377.9	308.7	264.5	269.4	629.5	624.7	194.7	121.4	96.04	73.07	98.57
120.7	91.83	169.9	370.1	716	871.9	695.7	482.6	409	421.7	484.8	564	625.1	787.6	860.9	818.1	727.9	623.8	505.6	414	309.9	297.2	251.3	453.4	743	272	135.7	102.4	79.96	70.95	724.4
118.2	166.2	101.3	487.9	853.8	867.6	544.4	517.6	387.8	425.8	494	529.4	618.6	711.2	767.9	817.3	710.9	618.6	540.3	396.5	306.6	296.1	266.5	345.4	740.7	402.4	151.4	117.1	83.99	57.56	158.1
104.9	121.3	106.9	370.2	768.4	609.1	619.3	509.4	406	395	429.5	551.3	590.9	673.3	739.8	751.7	695.1	639.3	517.6	386.8	333.5	302.7	291.2	285.5	632.6	575.9	192.9	115	88.16	57.25	70.17
123.1	99.45	81.63	393.8	619.5	772.4	576.9	459.4	388.7	384.5	441.4	509.4	543.8	637.6	733	727.6	691.7	569.1	478	385.8	319.4	300.9	288.5	279.7	468.6	691.1	262	132.1	100	65.81	54.22	321.8
87.48	130.8	167.5	393	594.4	725.7	569.8	452.7	433.2	367.8	439	436.2	562.5	645.4	731.4	703.7	650.2	595.2	481.2	392.9	346.8	307.5	289.6	279.4	371	685.8	363.7	140.2	94.85	77.72	48.41	90.48
137.9	170.6	105.1	210	687	622	618.8	433.4	396.3	372.7	403.5	493.9	514.2	606.8	713.2	702	652.1	565.2	472.4	392.2	337.6	306.9	296.1	294.9	291.7	607.3	506.2	171.3	109	83.54	54.2	56.54	763.2
162.8	65.05	51.96	414.3	594.9	719	567.2	495.7	413.1	328.3	370.6	415.5	507.4	589.8	643.4	689.1	624.1	553.6	456.5	380.9	339.9	326.5	303.6	284.1	271.7	462.7	609.9	231	108.6	86.98	61.23	51.92	163.5
155	130.1	104.3	369.4	517.7	567.9	507.4	453.7	416.7	385	378.9	423.4	503.2	534.6	632.9	641.3	625	523.1	451.7	389.7	341.2	327	299.2	297.9	270.6	351.3	649	335.4	133.9	94.35	69.62	48.29	63.41
96.23	140.8	133.3	401.5	450.2	618.9	526.5	413.5	368	373.3	357.7	429.6	504	545.8	581	610.6	593.1	544.9	433.1	380.9	338.6	317	298.8	301.6	277.1	293.2	569.2	447.4	148.5	102.9	75.97	56.48	50.92	338.2
106.8	121.4	153	261.3	558.8	660.2	488.8	470.6	369.9	417	388.1	397.7	495.7	539.9	560.7	577.5	561.2	516.3	464.1	388	342.7	330.9	321.4	301.2	282.8	266	459.9	547.6	200.4	114	84.86	69.86	52.49	92.69
90.36	98.84	123	292.2	469.9	690.7	488.3	410.3	372.6	416.1	380.3	427.9	455	578	543.8	570.3	572.5	501.5	440.8	375.3	339.5	328.6	319.3	296.7	291.5	271.6	352.4	573.4	276.3	122	90.95	75.35	62.82	60.25	652.9
66.51	137	179	380	581.2	600.3	522.2	453.4	389.3	373	366	416.8	452.1	532.9	537.1	557.1	504.4	487.6	439	363.9	350.1	321.8	324.8	301.7	283.2	268.5	286.5	516.1	381.9	139.4	93.63	80.23	61.45	59.96	139.3
143.3	79.01	111.4	291.2	419.3	763.9	494.7	388.6	346.8	356.6	358.7	407.1	466.9	514.6	490.1	564.1	530.6	499.1	432.3	372.6	340.5	330	324.3	306.7	300.6	276	259.6	420.8	473.1	181.6	103.6	88.18	70.85	57.83	64.21
180.9	148.3	58.56	204.9	476.9	590.3	498	406	385.7	345.2	372.3	433.6	450.1	480.9	513.3	518.3	496	464.4	426.5	357.4	338.1	330.7	316.7	308.6	283.3	273.8	264	336.2	535.4	254.1	117.2	100	79.5	66.57	49.8	274.9
246.9	177.1	114.7	197.7	495.4	512.2	470.4	392.7	351.2	399.3	361.9	409.3	434.8	473.6	525	528.2	513.9	459.3	439.6	363.6	334.5	310.2	324	314.2	303.7	284.3	256.3	277.5	514.9	347.2	139.6	109.6	94.58	68.92	51.33	82.49
711.1	110	166.8	235.6	572.4	518.3	457.1	350.7	400.3	370.1	387.4	358.1	435.4	425.2	546.2	480.7	477.3	468.7	437.8	370.3	321.9	327.8	316.1	312.1	300.7	288.4	266.4	248	433.4	451	175	120.9	102.2	88.18	62.39	53.69	574.6
1611	96.9	174.1	260.2	569.1	500.6	468.6	355.4	360.7	353.3	335.6	357.2	405.3	446.2	471.5	485	463.6	460.8	438.7	366.8	328.4	305.5	311.2	312.4	310.3	285.6	260.5	255.1	325.9	497	238.1	142	120.6	93.86	65.87	49.85	124.7
2249	98.52	147.3	344	469.2	491.6	427.4	348.5	339.2	349.7	368.6	357.8	399.7	425.6	439.2	467.2	450.1	477.4	413.7	350.3	322.8	306.3	314.7	314.1	313.1	286.5	270.2	254.5	270	492.5	320.2	151.3	130.1	103.6	80.14	55.95	52.53
3893	163	178.1	300	424.6	490.3	526.7	375	369.6	321.4	356.3	335.8	426.7	465.2	455.5	437.8	468.1	451.8	401.8	389.8	330.3	301.2	317.8	302.6	312.4	296.2	284.3	266.7	248.2	431.1	406.6	192.1	135	114.4	84.52	55.67	41.58	231
4098	451.6	78.7	242.6	449	543.6	450.6	370.6	370.7	344.6	369.5	342.2	423.5	409.6	444.3	476.4	492.8	452.9	444.6	365.7	342.6	332.6	312	309.1	295	302.2	285.3	265.9	249.8	351.2	477.9	239.4	154	124	92.4	55.86	40.88	62.78
4840	654.8	98.81	299.5	476.9	449.4	431.4	440.9	394.4	370.5	399.8	380.9	413.3	439.6	429.4	449.3	483.6	441.6	429.5	367	342.2	312.1	322.6	313.8	307.7	295.7	279.2	277.9	256.9	299.4	474.7	321.6	169.8	135	96.82	70.81	45.29	37.61	508.3
	1701	179.2	436.5	331.3	531.2	498.2	428.4	358	412.4	368.3	388.6	433.9	457.7	470.8	465	457.9	424.1	420.3	358.3	303.7	311.9	303.3	316.3	305	301.4	287.2	287.3	267.2	270	448.4	387.6	201.9	154.2	108.3	78.71	52.47	35.08	102.8
	2628	191	293.4	465.7	463.5	409.3	395.9	381.1	366.4	339.8	359.5	391.9	379.6	449.4	457.1	487.8	435.7	402.6	354.3	316.1	304	304.5	318.1	307.6	320.9	305.4	287	284.9	265.1	373.4	452.2	241.4	157.5	117.3	86.69	54.08	36.56	39.71	1011
	3549	235.3	354.9	351.9	465.4	352.7	417.6	322.7	349.9	377.7	387.4	386.7	413	426.3	458.4	470.2	437.5	404.6	335.5	305.8	287.5	305.7	306.3	299.5	298.5	313.8	298.2	269.3	278.8	319.8	464.5	300.1	168.7	126	85.72	53.77	38.18	31.24	194
		389.8	170.2	474.6	535	428.5	455.5	358	361.2	314.9	366.2	364.2	440.9	460.5	480	478.5	431.6	400.3	347.4	308.7	282.3	292.3	300	298.7	308.7	301.2	296.1	291.4	286.6	281.6	429.9	376.8	200	133.1	96.35	56.27	38.9	29.79	49.48
		852.5	221.1	397.3	460.2	506.2	396.5	389.9	379.9	377.8	353.8	359.5	438.4	435.6	462.4	449.7	429.2	406	343	298.3	289.7	287.6	309.7	292.4	311.7	313.9	312	302.9	271.2	279.7	368.9	436.6	234.5	148.5	102.1	65.39	38.89	31.01	28.07	418.9
		1537	153.4	375.7	466.5	477	370.9	399.6	349.6	386.3	356.9	378.8	416.9	476.5	469.3	484.6	439.7	412.9	336	288.6	265	286.1	284.7	298.7	312.5	297.8	304.4	293.5	289.2	284.8	313.7	451.3	278.2	151.5	108.8	66.6	40.71	33.4	24.6	84.08
			176.2	497	461.1	504	357.7	340.7	371.8	349.5	352.5	385.3	415.5	451.2	467	464.9	429.1	374.9	328.3	281	279.2	271.7	281.9	304.9	315.8	300.4	298.5	297.7	291.5	285	288.8	432.4	338.4	168.3	104.5	78.2	45.51	34.1	24.75	29.69	942.4
			297.8	324.7	415	405.3	413	405.1	361.4	397	356.8	380.7	423.2	456.5	473.5	455.5	389.2	399.7	332.1	285.6	279.8	266.8	274.8	294.1	300.3	304.7	299.1	306.6	299.2	295.4	279.1	385.4	385.8	194.4	117.2	81.07	51.26	35.25	25.38	20.3	184.3
			451.5	514.4	532.4	393.5	356.5	381.7	377	391.7	344	413.7	421.6	480.3	488.2	452.8	399	393.1	329.6	268.8	254.4	265.5	274.2	288.8	285.2	305.9	311.5	308.6	291.1	289.5	275.3	315.1	435.5	245.8	127.6	83.97	57.1	33.89	29.23	20.34	44.64	1761
			1048	412.1	429.3	406.7	389.7	421.7	329.2	341.6	354.1	398.9	401.9	432.9	460.7	477	421.9	378.8	315.1	271.1	244.7	253.5	261.4	302.4	298.3	304.8	316.1	314.9	302.1	293.5	265.9	291.7	409.7	286.3	134.3	83.56	60.86	39.74	28.54	18.34	20.93	400.2
				350.9	451	428.1	393.1	399.9	384.5	334.2	363.2	404.9	396.3	450.7	447.2	441	392.9	340.4	315.3	259.7	245.3	251.8	259.3	275.5	292.3	295.4	300.2	304.4	305.2	296.7	269	277.5	354.2	334.1	158.9	91.16	61.14	37.92	27.77	21.14	18.51	75.41
				542	503.5	453.2	434.6	438.3	397.8	352.9	359.8	402.9	383.1	458.8	441.8	457.9	388.4	376.1	289.9	254.7	253.2	246.6	263.7	275.8	277.5	296.3	295.8	297.2	297.2	296.3	278.4	266.4	312.6	360.9	185.2	97.26	68.07	43.01	31.24	21.73	17.13	24.13
				698.2	421.2	488.8	456.5	416.1	403.3	417.2	333.2	342.6	390.4	484	493	443.9	398	342.9	282.4	257.4	245.4	246.2	253.7	264	260.4	289.8	290.8	283.3	296.2	292.9	285.3	253.7	273.2	372.6	232.5	102.7	66.46	41.74	32.94	22.39	16.63	19.09	156.1
					481.6	461	494.7	430.8	460.2	367.9	356	335.7	407.6	446	465.8	422	390.5	346.4	276.5	246.9	235	248	243.1	258.8	264.8	293.3	302.5	299.6	296.7	295.9	282.1	264	242.2	319.5	274.1	126.9	66.87	49.94	33.05	23.09	16.98	14.39	36.65
					471.6	450.5	367.2	417.8	397.6	363.2	373.1	380	401.8	469.2	444.6	421.5	380.5	331	278.9	229	229.4	238.4	244.8	243.4	266.4	281.2	286.2	294.4	298.5	282.1	263.9	247.9	237.4	264.4	308.2	141.2	71.74	50.92	33.91	27.87	18.43	15.69	17.06	346.6
					461.9	423.6	373.2	379	424.1	366.2	363.4	358.5	415.4	434	459.5	434	375.5	328	266.7	244.8	230.4	220.3	227.1	237.8	249.7	270.6	281.8	300.3	291.9	268.1	272.8	261.2	230.5	231.2	295	184.6	79.83	52.9	35.53	28.52	18.53	15.09	12.01	64.9
					462.7	452.4	386.1	471.1	414.5	403	349.1	343.5	442.4	460.1	449.7	403.1	368.8	288.8	254.2	233.4	220.7	219	223.4	232.4	243.3	266.8	264.6	278.8	289.1	266.5	275	256.6	226.7	208	273	203.8	94.47	55.72	37.33	25.88	19.95	16.84	13.02	21.61
					661	404.1	398.8	365.1	380.2	391.5	343.6	364.6	407.5	433.5	437.7	420.5	360.9	288	229	218.4	205.8	205.4	217.4	242.7	242.8	262.9	266.6	274.5	283.2	273.3	267.4	255.1	226.7	196.7	222.4	236.1	102.3	56.66	38.8	29.01	24.81	14.79	13.29	14.12	136.7
					1399	400.4	435.6	415.2	387	343.2	357.3	340.2	376.5	402.9	470.7	386.7	370.5	267.9	259.7	208.1	195.8	211	208.3	231.1	236	249.9	252.4	282	266.3	273.1	262.2	241	222.2	180	201.1	237.2	130.6	59.59	36.92	30.44	22.91	15.47	13.33	12.04	30.35
						388.8	400.4	432.8	394.5	379	341.7	350.9	395.7	433.3	442.7	402.7	331.8	295.8	237.5	208.1	191	198.7	193	227.7	226.4	247.7	244.2	260	261.3	262.3	254.1	245.3	212.8	189	165.5	234.1	158.1	62.61	39.83	29.6	22.26	17.39	12.76	10.42	13.66	321.8
						339.5	361.6	410.5	421.1	328.5	330.1	367.2	403.7	419.5	449.9	396.5	340.6	276.2	226.8	197.1	196	185.2	200.7	205.3	236.2	237.3	250.8	257.5	263.6	255.9	249.5	243.8	209.9	180.7	150.1	201.5	181.5	77.92	43.19	30.77	20.55	18.14	13.14	10.93	11.24	59.16
							359.5	370	347.5	325.9	312.4	353.8	387.4	432.1	423.9	381.1	306.4	266	232.9	203.8	185.8	177.4	192.8	181	218.1	220.1	245.9	254.9	264	245.9	238	236.9	209.9	177.7	148	166.8	193.5	92.53	44.81	29.83	23.61	17.21	11.62	12.07	9.483	17.5	692
							399.6	378.1	359.9	351.5	318.6	345.1	359.5	407.9	396.8	366.1	298.1	257	215.1	195	177.2	178.9	192.7	190.6	204	219.4	227.7	227.1	242.1	246.6	234.1	235.8	201.1	177.7	139.7	136.7	183	128.6	50.56	30.2	25.7	18.65	14.28	11.29	8.926	10.83	130.1
							425.5	347.8	365.7	322.4	318.7	339.3	386.2	388	379.1	388.4	295.8	249.5	191.6	182.4	172.4	170.4	181.2	180.4	196.9	210.6	233.6	230.7	235.4	223.7	234.4	225.2	203.5	176.1	136.7	114.5	162.9	144.6	61.41	30.36	25.77	18.26	15.01	11.25	9.298	8.384	27.77	1276
							403.9	347.2	361.2	320.2	332.1	316.9	311	387.1	360.7	356.4	275.7	232.3	195	167	172.4	168.6	175.9	183.1	175.7	206.6	208.2	224	226.1	225.8	226	220.8	198.8	165	136.1	108.8	130.9	157.9	69.9	28.77	25.23	19.62	13.91	11.34	8.51	8.57	12.61	292.5
							383.2	348	341.1	310.4	324.2	343.1	352.5	374.7	367.2	339.9	287	235.3	185.9	174.1	157.3	158.7	167.3	184.4	181.1	194.8	204	211.3	221.4	219.3	219.3	217.6	191.3	159.6	131.4	111	107.5	160.8	90.64	37.62	28.17	19.12	14.37	10.78	8.173	8.703	8.322	53.6	2261
								364.3	310.7	305.2	297.9	299.7	366.3	363.8	362.2	324.3	266.3	220	188.8	151.2	149.1	151.6	163.7	174	179.5	186.9	195.2	202.4	208.8	218	213.6	197.5	187.3	156.6	129.4	104.7	93.45	135.7	107	38.57	26.13	20.21	14	12.5	9.495	8.027	7.817	15.29	668.5
									353.8	331.3	293.1	298	318.3	361.6	343.6	351.5	247.1	212.5	181.5	158.7	149	144	147.8	164.5	176.6	178.2	186.4	199.9	206.3	202.4	207.9	180.9	183.5	146.7	128.8	100.4	78.75	111.1	124.4	56.98	27.01	20.6	14.34	13.13	9.624	7.187	7.196	8.647	130.8
									304.6	306.3	317.8	278	329.2	341.7	284.3	324.5	239.6	207.9	165.6	152.2	150.1	137.8	147	158.2	165.8	172.1	172.2	183.1	196.3	198.8	190.9	181.6	170.8	152.5	124.6	99.75	75.72	91.85	124.6	70.5	29.01	18.35	13.82	11.42	8.582	6.602	5.941	6.505	26.84
										307.6	293.8	270.7	309.9	364.4	333.5	291.1	241.7	202.2	175	158.3	141.1	146.4	131.7	140.2	161.2	157.9	163.7	179.5	179.3	187	184.3	180.6	165.7	147.1	129.2	91.88	78.58	76.19	119	83.69	33.02	18.78	15.76	11.62	10.24	6.597	6.507	5.682	10.71
										273.7	280.1	295.5	280.2	336.1	280.1	281.5	239.6	193.1	154.9	153.2	136.4	138.2	129.8	143.9	148	160.6	173.1	169.9	171.7	173.5	176.2	170.7	162	142.2	114.7	89.76	75.58	60.07	103.3	105.5	41.02	19.9	14.94	12.41	9.452	7.836	5.851	5.375	6.653
										305.5	287.8	243.7	293.4	291.5	306.9	280	227.8	188	154.1	137	126.9	119.6	120.9	129.4	139.8	150.6	157.4	166.1	167	171.9	168.6	172.8	160.4	138	109.6	87.78	71.15	55.47	78.66	111	52.27	21.62	15.84	11.11	9.183	7.847	5.124	5.637	5.609
										263.9	249.3	248.3	268.5	271.7	297	256.7	218.6	157.2	144.5	122.8	119.8	108	119.1	124	125.1	146.6	148.3	155.8	163.6	162.9	159.6	169.5	150.1	133.8	111.7	87.45	68.6	56.32	57.37	99.26	64.84	22.44	14.18	10.98	9.66	8.446	6.892	4.975	5.913
										280.8	240.2	243.6	248.7	276.5	313.5	244.1	212	164.6	142.9	125.3	110.7	117.8	122.8	113.9	115.9	131.4	147	147.7	154.2	164	154.6	152.1	148.6	137.5	105	83.13	67.37	52.16	49.65	88.86	77.87	27.22	17.89	10.94	9.789	9.096	7.622	4.943	5.077
										271.5	278.8	246.1	264.4	251	294.2	235.8	199.8	171.4	129.6	125.7	96.79	103.4	114.4	118.9	119.3	130.8	131.5	139.9	145.8	156.1	147.9	143	136.9	130.1	98.39	81.14	63.1	53.59	42.08	71.93	84.56	37.87	18.26	10.94	9.026	7.895	6.798	6.24	4.426
										261.4	227.4	224.6	247.9	228.9	277.6	221.1	187.8	151.1	132	117.2	116	105	99.66	108.9	115.2	116.1	128	138.2	134.2	140	139.9	137.3	130.4	121.1	96.93	84.41	62.78	51.44	40.85	49.16	90.65	45.92	21.78	13.61	9.906	7.053	6.383	6.932	5.037
										241.3	238.5	221.9	245	240.6	251.4	212.7	182.4	145.9	131.1	94.42	102	100	100.1	98.1	105.5	110.7	128.8	126.8	131.9	139.1	136.4	131	123.3	111	89.41	79.6	62.97	51.45	41.81	41.37	78.42	62.04	23.53	13.69	10.31	7.161	5.609	5.95	4.803
										232.5	229.4	235.6	233.9	241.5	260.9	223.7	188.9	141.8	108.2	94.64	83.66	87.47	103.5	100.1	107	100.1	118.5	116.6	122.6	136.4	126	126.8	128.2	108.8	89.16	73.26	60.76	51.66	34.1	37.34	64.52	73.31	26.74	13.7	11.06	7.552	6.19	8.072	4.961
											207.6	224.1	200.6	223.7	258.6	199.6	190.7	120.3	106.9	98.83	90.99	90.45	94.77	93.55	99.49	106.5	109.4	114.7	122.9	121.4	129	122.1	116.2	110.5	82.92	70.42	58.87	48.97	38.56	32.06	51.9	74.34	35.95	15.75	9.461	8.717	7.308	6.918	5.095
											195.2	235.1	211.9	212.8	241	196.5	165.8	111.1	107.3	84.75	81.94	86.02	87.59	88.67	93.75	94.73	107.6	106.6	117.1	115.1	120.4	120	109.4	92.81	83.59	76.84	54.51	46.25	39.39	30.94	36.42	67.96	55.2	16	10.49	10.3	8.059	6.376	5.589
											197.5	217.4	199.3	220.2	241.1	202.6	157	123.4	105.5	86.76	89.27	75.67	76.44	85.44	80.92	95.94	100.6	108.5	106.5	116	115.1	113	108.4	100.9	84.18	70.84	56.88	43.95	36.79	28.83	29.58	58.34	57.26	22.04	11.09	10.73	8.345	6.473	6.755
											197.8	201.2	213.2	197.9	225.3	184.3	156.5	116.7	102	84.11	70.11	78.13	75.69	80.26	78.52	91.76	101.8	101.6	104.1	107.9	104.8	110.1	93.61	97.52	80.82	63.18	57.33	42.38	37.63	27.37	28.96	48.1	63.67	33.6	10.41	9.819	8.634	6.963	5.167
											191	192.6	210.8	200.9	203.4	166.7	144.2	108.6	102.8	74.86	61.73	80.03	72.23	78.19	81.29	85.41	89.08	97.3	98.72	104.1	95.93	105.5	95.6	82.08	78.17	65.62	48.2	46.27	35.4	29.25	26.07	36.27	62.36	40.01	11.52	9.144	8.743	7.077	5.811
											187.2	210.2	186.8	201.1	214.9	161.5	146.3	112.5	85.96	76.01	67.22	72.39	64.97	74.95	78.06	76.41	85.96	89.15	88.34	97.44	98.87	103.8	91.83	81.98	74.13	60.42	49.97	41.96	31.19	27.92	24.65	27.68	53.93	47.78	18.13	11.29	9.429	6.754	7.441
											181.6	172.7	179.8	182.1	183.9	175.9	140.2	115.3	88.85	68.39	64.41	70.44	61.9	74.22	76.45	76.8	83.57	84.38	87.66	95.46	87.91	92.61	87.81	82.09	64.93	60.75	52.69	42.79	35.26	28.38	26.31	23.44	42.56	56.19	26.45	10.55	10.09	8.66	6.383
											161.6	174.2	189.9	166.5	186.7	151.7	126.1	105.3	80.43	68.12	64.58	64.24	59.33	68.69	68.79	77.27	84.8	85.23	93.92	88.73	87.45	93.57	88.79	78.18	64.03	58.65	48.58	39.8	35.38	28.81	25.17	21.12	31.98	52.17	26.6	11.61	8.427	7.187	7.421
												184.9	169.3	170.1	208	163.3	126.5	95.32	80.55	67.47	58.88	62.14	62.38	64.07	66.67	70.11	72.26	79.09	82.32	81.7	91.17	82.49	84.99	69.96	69.21	53.53	47.83	41.11	36.29	28.05	24.52	20.95	24.19	50.26	35.96	13.07	9.801	8.799	7.358
												164.6	168.3	184.8	172.9	153.3	116.1	101	74.97	67.06	56.15	58.44	61.87	66.58	61.68	66.91	71.25	72.07	78.1	80.68	77.52	76.21	80.34	70.75	62.41	49.92	42.39	39.08	34.01	25.58	23.28	18.93	19.92	40.35	43.11	17.91	10.9	7.41	6.693
												153.9	162.1	185.2	169.7	157.9	114.1	95.84	76.59	65.29	57.22	55.64	53.94	57.81	62.64	64.63	69.04	71.82	72.48	75.47	77.2	76.87	66.91	66.63	54.52	48.47	39.48	37.98	30.98	30.6	23.09	22.14	17.85	31.28	47.03	25.92	10.09	8.115	7.889
												172.8	160.1	182.6	176.2	141.8	111.1	83.13	69.39	64.25	53.35	56.1	50.85	57.7	57.34	60.32	59.1	68.1	66.08	75.42	71.16	74.9	71.47	65.32	57.25	48.81	39.99	32.42	29.16	25.38	24.16	22.69	18.55	22.58	45.4	31.52	11.95	8.079	7.398
												151.7	162.4	163	160.5	147.1	100.7	81.67	64.06	55.3	58.1	52.49	46.98	58.09	52.61	57.02	54.08	58.17	59.53	67.75	66.09	71.1	68.23	60.94	54.08	49.32	37.75	34.77	27.47	26.51	23.21	21.06	18.45	19.36	40.58	36.56	17.87	9.119	8.525
												163.2	155.8	168.1	153.3	136.6	100.3	74.84	69.18	45.8	46.31	52.82	54	48.17	51.38	49.01	53.63	54.72	62.47	69.5	63.37	67.18	64.35	58.78	53.07	42.91	38.72	29.78	27.63	24.14	23.6	19.8	16.99	15.54	33.22	40.49	20.77	8.458	6.989
												250.5	150.2	152.8	140	128.9	91.53	74.25	60.93	56.07	43.16	46.4	44.89	47.79	49.86	52.52	45.69	52.62	61.91	62.09	62.8	59.01	51.32	56.27	49.21	44.88	33.13	34.54	28.89	25.93	22.82	19.82	18.23	16.05	24.57	42.63	24.44	11.4	7.494
												877.2	131.2	160.8	148.7	125	91.93	72.25	57.69	49.02	50.96	39.29	45.72	43.12	48.17	51.1	47.53	55.21	58.18	59.7	62.09	56.55	60.79	50.13	49.34	41.24	32.16	29.01	27.02	24.32	21.49	19.7	18.36	14.66	20.43	36.04	28.33	13.84	6.793
													133.5	153.6	128.7	121.4	99.82	74.2	58.81	50.7	42.67	42.45	45.55	42.04	42.43	46.67	46.37	46.28	55.47	54.92	55.11	52.39	50.45	45.71	44.67	42.17	33.58	28.97	26.2	23.17	18.95	20.75	17.83	15.78	16.35	32.35	34.85	17.49	10.33
													133.5	129.9	138	121	81.41	62.37	57.43	46.62	41.05	40.53	41.75	44.91	46.27	49.2	44.3	47.76	48.86	48.12	51.19	53.5	50.39	43.19	40.45	35.73	29.88	28.63	27.1	22.89	19.57	18.55	17.24	13.98	15.93	24.01	39.15	18.84	8.904
													151	124.7	137.1	98.41	78.51	64.79	57.44	44.09	39.57	41.43	36.54	38.94	41.94	43.12	41.4	42.22	51.05	49.5	51.03	54.65	48.02	43.15	35.52	37.74	28.23	28.99	22.81	19.49	19.62	17.69	15.36	15.59	12.97	18.98	30.89	25.03	10.77
													212.2	139.5	117.4	97.77	81.54	65.23	46.38	39.85	37.26	36.27	35.36	38.73	36.05	40.35	37.84	38.5	42.59	52.37	45.36	46.62	43.15	43.76	36.54	34.36	29.67	23.59	22.96	22.1	18.34	14.37	14.84	17.68	11.91	14.58	28.69	29.08	13.42
													664	122.4	114.2	100.3	75.57	65.06	48.32	49.7	33.81	38.79	36.65	38.71	38.43	37.98	41.29	39.88	41.41	45.55	39.52	47.8	46.91	41.82	33.57	34.4	30.36	24.55	22.17	19.25	20.36	15.48	15.01	15.94	14.68	12.27	23.17	29.94	14.69
														140.8	117.7	99.98	78.43	62.93	48.76	34.1	33.98	31.16	30.89	33.69	35.35	35.77	33.91	40.61	43.89	43.91	41.23	42.06	41.38	39.45	34.8	31.19	28.11	27.98	20.06	20.16	16.71	16.26	15.34	13.88	12.56	12.47	16.77	30.54	20.55
														139.9	107	82.02	74.44	55.7	50.02	35.34	31.48	30.87	35.43	27.98	36.43	36.15	37.08	37.62	39.95	38.21	37.97	36.11	36.06	36.95	33.19	31.93	26.01	23.12	22.05	18.01	19.24	17.02	13.78	15.24	12.97	11.99	13.43	26.65	25.3
														124.4	119.7	87.49	64.79	55.89	44.65	37.31	33.1	32.93	29.27	29.78	30.36	32.48	38.78	37.86	37.21	37.09	42.99	36.5	38.8	35.52	32.22	28.24	24.53	21.48	19.23	18.53	15.57	14.97	13.15	12.39	12.44	9.757	11.45	24.14	27.11
														192.1	126.9	88.56	72.49	55.57	37.86	30.51	33.04	30.42	27.52	29.81	30.54	31.14	30.34	35.63	36.08	36.76	40.41	36.07	34.77	34.79	27.29	27.51	22.79	21.79	18.28	16.57	15.37	14.07	14.78	13.72	12.16	11.49	11.21	19	26.63
														554.3	107.8	74.09	70.64	47.35	33.05	31.07	30.75	30.03	26.57	28.68	31.2	28.95	30.99	30.4	33.28	31.23	34.53	33.22	35.66	28.31	29.55	29.49	23.47	20.82	17.93	15.68	16.2	14.78	12.87	12.42	10.22	10.47	10.2	14.03	29.38
															105.4	79.75	65.81	51.76	33.16	33.19	28.22	27.8	27.4	30.9	27.9	26.78	31.57	32.7	31.26	31.08	34.52	32.74	32.74	29.85	27.81	27.06	20.95	20.1	17.5	15.65	14.14	15.06	12.93	13.18	10.32	11.89	9.898	11.73	22.14
															103.6	72.87	56.43	48.92	33.34	31.55	28.29	24.62	23.69	25.35	25.39	26.69	28.6	26.69	32.52	29.17	31.17	34.21	30.61	27.52	25.38	26.05	20.84	18.32	18.51	17.96	14.99	14.37	13.99	11.75	12.37	9.391	8.329	9.572	17.42
															116.8	81.31	55.5	49.06	36.94	29.42	27.88	23.03	25.67	24.69	22.04	26.15	25.2	27.53	31.11	28.45	28.88	29.87	32.57	26.31	25.35	24.72	18.14	17.25	16.82	14.97	13.41	13.2	12.75	9.522	9.6	10.69	8.992	8.455	15.67
																84.51	61.34	42.19	31.43	29.49	28.44	18.39	27.59	23.15	20.84	24.61	27.54	25.78	30.91	27.89	27.69	27.38	27.19	22.45	22.71	22.41	19.26	18.93	18.8	16.14	12.9	13.1	11.9	10.87	9.618	9.519	6.971	7.641	9.955
																76.63	57.77	43.43	33.9	31.59	24.23	19.63	23.73	22.83	24.18	21.72	21.39	24.87	26.9	26.21	28.99	26.07	27.27	23.22	21.94	21.88	17.51	16.54	16.55	14.94	12.92	11.67	11.5	8.967	11.96	8.395	7.672	7.458	9.549
																67.67	60.39	35.76	31.47	26.73	26.18	21.77	19.97	21	22	21.78	22.52	22.16	23.95	22.07	26.31	26.14	23.77	24.69	21.11	20.78	17.86	14.11	14.41	12.3	13.81	12.31	10.04	9.721	9.752	9.151	7.86	6.372	7.34
																72.04	63.42	33.6	28.26	26.58	23.19	19.7	16.81	23.07	21.3	21.19	23.38	24.09	24.18	24.41	24.4	24.9	20.07	22.84	21.26	18.71	15.49	15.4	14.18	12.69	10.46	11.26	10.09	10.85	10.56	9.293	7.773	6.588	7.862
																64.36	44.76	37.19	27.71	19.2	23.76	21.03	18.75	17.36	20.75	24.61	23.13	20.46	22.23	24.65	22.53	24.72	21.22	21.79	18.93	17.67	13.37	14.23	13.45	14.33	11.48	11.71	10.74	9.063	7.453	7.903	6.221	7.686	6.335
																103.6	43.81	34.46	28.73	23.68	21.69	19.05	17.27	18.49	17.91	20.13	21.38	20.58	20.31	21.68	19.8	20.77	21.06	16.25	17.94	17.42	14.76	12.54	13.16	13.46	10.77	10.16	10.67	8.723	9.318	6.649	7.783	5.969	5.623
																340.9	44.57	35.33	26.07	23.19	17.56	18.3	19.06	17.73	18.9	19.19	22.23	16.59	19.97	19.9	17.96	18.81	23.6	18.69	17.42	14.81	15.4	13.44	13.62	12.62	11.56	9.174	9.993	8.549	9.083	7.425	6.279	7.728	7.005
																905.1	52.64	33.37	23.06	20.82	18.15	18.44	17.71	14.66	15.73	17.51	19.25	17.07	19.13	17.91	18.99	19.4	20.93	17.05	16.23	13.64	13.19	12.35	10.54	12.97	9.848	9.351	8.778	8.141	7.359	8.223	7.049	5.532	6.429
																	46.67	33.11	21.7	19.03	19.37	15.49	13.97	14.48	12.69	15.35	17.29	17.85	21.72	17.24	17.23	21.23	19.66	17.94	16.63	14.55	12.65	11.91	11.47	12.42	9.06	8.989	8.95	8.255	8.027	7.905	8.122	5.868	5.2
																	51.3	33.35	19.09	20.3	14.82	15.46	19.37	14.7	17.56	16.53	18.08	13.46	17.47	15.66	16.97	16.04	17.68	15.37	14.95	12.49	14.27	10.51	10.95	11.14	9.365	8.304	9.062	7.776	7.523	7.549	4.903	5.471	6.32
																	85.46	37	26.79	22.32	16.96	16.06	15.68	14.32	13.48	13.38	15.9	13.58	14.69	14.6	18.11	17.75	16.21	14.39	16.11	13.9	14.49	11.08	8.991	9.825	8.483	9.986	10.04	8.424	7.248	7.55	6.183	6.227	5.101
																	224.5	30.08	22.23	22.8	16.39	15.11	14.44	13.8	14.61	15.01	16.37	14.7	12.42	17.32	13.08	15.99	15.48	15.43	13.7	11.49	10.78	11.17	8.652	8.57	7.619	9.186	10.14	7.706	6	5.195	7.102	6.432	4.264
																		36.09	27.76	21.19	13.97	14.32	12.36	12.43	13.39	13.69	12.62	14	14.49	16.38	15.73	15.42	14.15	14.25	11.06	12.05	10.02	10.6	8.034	7.042	9.13	7.102	8.084	5.936	6.03	5.794	6.545	5.062	5.248
																		28.39	21.16	16.32	16.17	12.29	10.61	10.9	10.56	14.43	13	15.99	14.42	16.49	15.05	14.37	14.56	12.44	13.32	11.17	8.765	10.1	9.308	8.74	8.695	7.727	7.53	6.464	6.287	6.041	7.14	5.714	4.345
																		35.54	19.71	12.92	12.7	9.463	12.01	13.45	10.13	12.11	13.05	13.3	16.38	15.32	12.86	13.36	14.21	13.2	11.06	10.79	9.353	9.792	10.43	7.911	7.007	5.673	6.471	6.302	5.645	8.141	4.307	4.648	4.207
																		54.99	28.18	15.46	10.64	11.91	12.02	10.48	11.17	9.741	9.318	12.18	11.66	11.33	10.45	12.35	11.69	12.33	9.877	9.163	9.368	9.507	8.187	8.491	6.53	7.136	7.512	5.648	6.838	6.091	4.718	4.495	4.001
																		178.9	27.32	15.41	14.59	10.01	11.07	8.477	10.93	10.54	10.09	12.6	11.29	11.27	11.15	12.13	13.48	9.847	10.53	9.077	9.41	8.93	7.058	7.745	5.746	7.035	6.807	5.597	4.918	5.692	5.236	3.964	4.627
																		454.3	20.27	17.63	12.2	10.94	11.93	12.2	11.95	10.92	10.22	12.52	9.183	10.27	11.27	10.19	9.807	10.68	10.27	10.11	7.707	8.587	6.497	6.841	6.501	6.237	5.394	5.826	4.596	4.81	5.463	4.909	3.549
																			20.76	16	12.87	10.09	11	8.918	12.46	11.05	11.1	13.31	13.33	10.43	10.95	10.78	9.479	9.544	8.382	9.111	8.593	7.105	6.97	8.14	6.138	5.767	5.742	5.358	4.82	5.272	3.566	5.86	4.034
																			23.96	18.45	14.56	10.35	11.91	12.05	9.449	11.55	9.068	10.43	9.37	10.36	11.27	10.22	7.822	8.076	9.98	9.213	8.145	8.058	7.703	7.614	7.791	5.672	4.647	4.758	4.499	5.015	3.774	4.896	3.782
																			40.68	17.7	15.95	9.252	10.25	10.17	8.84	9.508	9.103	7.771	9.402	10	9.174	8.211	10.9	7.729	9.92	6.3	6.399	6.274	6.353	6.764	6.493	4.558	4.799	4.586	3.048	5.139	4.122	4.213	4.129
																			140.9	14.71	11.44	12.34	10.26	11.19	8.62	10.17	11.11	9.875	10.65	6.937	7.722	8.391	9.047	8.158	7.3	6.761	6.77	6.545	6.591	5.35	4.461	3.923	4.287	3.817	4.162	3.069	3.596	3.858	3.267
																			393.8	14.52	14.65	8.759	10.95	11.03	7.003	10.89	8.476	8.559	10.83	8.858	8.893	8.187	7.74	6.064	6.246	6.645	6.315	4.877	5.186	6.16	3.557	4.897	4.852	4.207	3.688	3.637	3.959	3.014	3.766
																				20.06	9.785	10.39	11.49	7.542	9.341	7.854	7.33	7.629	7.31	6.79	5.857	8.438	8.025	7.773	5.654	6.2	5.534	5.195	4.985	5.25	5.198	4.717	3.734	4.598	4.131	3.506	4.452	2.745	3.034
																				20.89	12.33	11.29	8.922	9.466	9.513	8.805	8.412	8.858	8.689	6.848	7.161	7.223	7.719	6.336	6.853	5.866	4.871	6.304	4.543	5.073	4.728	4.078	4.198	4.175	5.13	3.802	3.362	2.55	2.765
																				39.73	11.6	10.41	9.175	9.944	8.455	7.598	7.783	7.684	7.745	7.214	8.438	5.771	7.279	5.873	7.837	6.393	5.589	5.79	5.579	4.437	3.697	3.849	3.45	3.513	3.565	4.209	3.89	3.654	2.473
																				109.7	15.54	8.478	9.56	6.621	7.016	7.056	9.599	7.196	5.765	6.991	5.9	7.427	9.502	6.393	6.178	4.432	4.96	4.931	5.121	3.9	4.053	3.725	3.672	3.475	3.833	3.199	3.386	3.952	3.238
																				309.5	9.526	13.75	8.139	9.731	7.026	8.405	7.975	7.051	8.447	6.328	7.046	5.379	7.044	4.836	5.131	5.872	3.727	3.986	4.946	4.573	3.463	4.369	3.468	3.404	3.954	3.578	2.419	3.888	2.047
																				721.2	11.23	11.27	8.154	7.492	7.53	5.105	6.096	6.802	5.75	6.786	7.835	4.723	5.826	4.367	7.563	5.387	5.271	3.343	4.877	3.514	3.78	4.141	4.115	2.73	3.719	2.618	2.457	2.452	2.315
																						8.247	6.877	7.928	6.02	5.523	6.443	5.184	7.064	8.083	5.862	5.824	5.406	5.394	5.735	5.733	3.794	3.653	4.991	3.882	2.49	3.339	3.621	3.297	2.072	2.127	2.23	2.182	2.609
																						7.795	8.035	7.386	6.204	7.082	6.721	6.213	7.481	6.114	5.652	5.388	5.896	5.043	4.38	4.209	4.925	4.073	4.658	3.28	2.977	3.42	3.924	3.092	3.395	2.721	2.567	1.678	3.028
																						11.49	6.781	6.185	7.304	5.887	7.091	5.932	5.583	5.392	6.218	4.127	5.455	4.081	5.034	4.564	3.63	3.637	2.207	3.587	3.24	2.437	3.065	2.652	2.646	2.6	2.424	2.19	1.843
																						12.25	7.773	8.64	7.385	5.835	5.582	6.275	6.51	5.232	5.406	4.395	5.115	4.231	4.43	3.37	3.414	3.792	3.481	3.773	3.055	2.869	2.36	2.125	2.328	2.257	2.557	1.995	1.822
[truncated: 1 more columns]
