# Supplementary material for: Utilization and transformation of Chrysotila dentata-derived dissolved organic matter by phycosphere bacteria Marinobacter hydrocarbonoclasticus and Bacillus firmus
Source: PeerJ. 2024 Jan 4;12:e16552. doi: 10.7717/peerj.16552 (PMC10771764; doi:10.7717/peerj.16552)
Supplement: Supplemental Information 7 [file peerj-12-16552-s007.xlsx]

## Sheet: Sheet1
71.36	112.8	92.46	57.22
5.102	96.78	126.2	280.9	302.2
104.3	113.7	64.59	289.9	244.5
179.3	124.4	173.4	255	229.2
15.16	63.59	154.7	219.1	353.5
15.86	118.4	143.2	109.9	507.2	390.7
40.84	127.6	221.2	45.75	619.1	520.4
43.45	67.13	144.4	84.27	290.9	693.4	299.8
99.05	113.4	122.3	97.93	194.7	832.8	400.6
174.9	140.1	134.2	69.62	252.5	639.5	608
232.1	181.3	187.1	104.6	85.05	553.5	898.9
68.99	197.1	90.14	160.9	138.5	323.5	975.1	456.5
168.3	163.5	106.7	179.2	163.9	169.8	800.6	777.5	288.2
316.1	166.2	199.5	79.02	163.8	177.8	542	991.6	335.4
126	188.5	125.4	109.5	220.4	122.1	308.2	1148	493.9
186.2	167.9	102.8	124.3	174.3	126.2	200.9	887.4	839.4	238.8
190.8	139.7	120.7	222.5	150.3	142.9	135.3	503.7	1002	335.5
120.2	271.6	145.8	145.7	122.2	131.9	116.8	329.6	1134	545.9	329.5
157.3	295.5	141.4	203.9	204.3	120	80.03	133.6	879.2	996.4	208.4
162.9	248.1	286.1	214.8	137.4	86.59	137.6	104	553	1298	353.6	577.4
262.9	205.3	175.2	320	85.49	194.3	84.1	107.9	276.7	1298	641.2	233
220.4	221.7	123.1	265.9	250.3	147.3	95.4	71.41	132.6	1024	1169	204.1	1413
260.9	234.2	256.4	260	309.6	177.8	79.94	82.39	97.73	581.3	1506	334.4	373.9
296.1	163.5	206.3	299.9	397.9	195.4	129	59.98	67.01	283.5	1408	733	207.8
381.7	212.9	170.6	206.1	277.8	230.6	150.6	81.83	69.29	175.5	1080	1251	245.1
332.4	129.9	224.3	179.6	464.4	305.7	155	84.71	81.43	110.2	676.9	1620	402.8	283.1
156.7	282.9	107.7	244.7	400	285.3	174.5	80.81	92.79	87.5	340.3	1610	837	279.3
187.1	195.9	232.8	244.6	427.4	454.6	158.8	91.09	70.58	68.81	171.8	1221	1388	294.8	489.7
190.3	175.6	187.4	363	564.9	457.2	215.8	138.1	70.32	88.05	117.6	688.3	1835	469.3	309.6
185.6	157.9	190	396.8	566.1	606.1	338.8	151.1	79.56	102.1	124.3	357.4	1828	945.1	316.5
202.3	317.3	201.8	370.2	784.1	580.6	324.6	186	105.1	98.95	116	246.4	1385	1487	432.3	445.1
257.2	283.4	157.9	391.9	567.7	600.2	432.9	243.3	122.4	117.7	142.7	206.2	820	1986	643.7	386.7
163.7	284.4	153.5	437.9	694.4	800	494.1	250.2	180.5	153.1	147.7	218.5	540.5	1977	1086	418.9	586.9
290.8	259.9	226.1	414.6	624	787	512.9	278.1	140.9	150.2	140.3	216.2	340.2	1587	1706	521.4	444
262.9	291	101.9	437.6	680	937.3	597.2	255.9	176.5	150.5	179.8	237.2	303.2	1061	2251	708.8	441.9
178.2	246.3	269.1	481.1	880.4	721.5	561.7	305.9	187.3	166.2	184	229.9	345.9	671.6	2334	1200	484.6	417.5
340.4	159.6	199	410.1	714.5	925.2	631.3	368.2	197.5	182.6	198.4	265.8	346.7	555.4	1883	1794	538.2	392.6	1266
261.2	251.8	280	327.2	802.2	932.1	643.8	410.9	211.8	229.3	241.3	282.5	377.1	518.3	1304	2377	743.3	416.2	441.1
225.3	136	184.6	384.5	801	891.8	820.5	440.7	202.6	253.1	256.1	287.4	430.5	538.2	921.4	2448	1215	435.2	293.5
144.7	166.9	258.3	347.6	780.7	942.7	823.9	527.4	258.9	231.9	274.8	351.8	472.9	557.2	772.7	2006	1774	500.7	297.9	506.8
163.5	167.5	205.3	409.3	732	873.6	904.6	540	325.7	285.5	280	394.3	456.9	645.8	747.4	1415	2268	722.2	332.3	249.4
289.1	177.8	324.9	419.3	861.6	996.1	820.7	548.1	315.8	330.6	320.5	463.3	565.3	708	823.2	1147	2389	1087	366.6	241.4
125.2	142.8	248.1	374.5	815.7	1112	904.7	579.6	309.4	340.1	390.7	520.2	595	774	886.4	987.2	2043	1656	451.3	250.5	237.9
114.9	187.8	144.2	361.4	978.7	1311	1022	631.4	370.4	353.5	424.2	530.9	718.6	874	985.5	1003	1603	2091	621.1	270.6	176.9
248	154	244.9	507.7	1143	1346	1062	678.7	395.7	415.2	518.2	630	774.4	896.7	1074	1074	1241	2222	912	298.2	169.3	317.3
291.5	201.9	156.4	598.4	1167	1269	1101	670.2	441.7	416.5	465.5	703.5	909.1	1007	1138	1176	1088	1915	1364	358.6	177	149.9
315.7	140.8	156	539	1474	1397	1108	695.5	518	452.1	579.6	724.6	920.3	1071	1262	1249	1127	1538	1765	474.8	201	118.1	563.2
242	163	205.8	431.7	1375	1469	1069	712.6	496.5	449.2	572.8	780.8	980.5	1193	1334	1285	1074	1210	1899	736.3	209.8	119.8	163.5
271.8	227.1	114.6	651.4	1411	1546	1224	729.4	459.8	513	699.1	783.3	1014	1221	1316	1351	1156	1074	1678	1085	231.2	134.5	99.59
180.7	241.1	143.2	548.3	1603	1447	1215	686.1	546.2	505.1	633.4	866.9	1028	1228	1386	1373	1189	1014	1297	1394	322.1	123.2	98.99	235.3
148.7	199.7	90.55	506.5	1524	1465	1144	727.7	543.2	514.5	725.1	896.1	1074	1261	1412	1337	1215	980.5	954.3	1472	511.4	125.7	100.7	107.9
131.2	179.4	134.5	719	1612	1467	1219	690.3	468	492.4	671	842.7	1054	1260	1446	1378	1224	967	827.7	1318	834.6	147.6	92.57	77.49	411.4
185	108	236.5	565.2	1242	1505	1161	742.5	526.7	531.1	686.7	901.1	1147	1299	1479	1465	1229	995.3	758.9	974.1	1122	218.5	96.83	83.47	119.8
170.5	133.8	207.1	542.4	1387	1366	1236	760.3	507.3	523.1	675.3	887.9	1136	1370	1373	1457	1245	1021	758.3	687.2	1175	393	100.3	71.49	80.88	730.5
53.73	118.5	175	644.2	1285	1489	1299	744.8	570	555.2	636.4	822.4	1082	1326	1411	1412	1250	1024	731	521.9	1050	651.6	119.4	69.84	68.68	154.8
24.6	210.7	206.6	624.4	1399	1493	1306	712.6	547.2	525.3	679.6	782.7	1064	1252	1368	1381	1276	1019	749.2	479.9	748.7	863.2	171.1	69.8	68.56	69.37	1245
82.19	78.94	144	570.3	1257	1661	1096	733.6	484.3	474.7	671.3	767.1	1011	1193	1374	1377	1194	995	708	430.5	487.6	957.5	315	88.05	65.81	55.51	250.8
69.07	91.76	171.6	419.6	1132	1520	1058	701.9	482.2	454.8	569.7	778.6	1037	1193	1375	1390	1178	988.5	723.6	411.3	350.4	868.2	529	90.91	71.96	55.03	89.13
114.1	127.7	137.6	645.6	1037	1279	980.5	746.8	462.4	478.4	545	735	989.5	1149	1277	1333	1187	982.5	721.8	411.1	294.8	631.5	723.4	146.5	75.85	53.79	59.31	418.2
105.8	56.24	140.4	472.2	1004	1240	987.9	699.1	439.4	430.4	546.7	690.9	869.4	1096	1243	1212	1098	892.4	707.4	425.4	275.8	392.5	850.4	256.4	78.59	56.41	46.64	105.8
146.6	29.99	91.43	590	975.4	1089	1045	604.6	453	432.6	519.3	629.5	875.1	1099	1182	1167	1054	891.4	671.7	398	248.3	256.1	767.6	443.8	91.06	57.75	51.06	51.85	744.2
146.7	113.5	298.9	532.9	904.9	1205	1042	633.5	468.6	417.6	491	677.1	826.3	1018	1120	1152	1069	875.9	648.2	390.1	237.2	194.1	593.2	637	129.3	62.88	52.53	46.49	162.9
33.68	170.3	159.7	395.2	984.3	1118	934.7	631.3	437.2	429.2	472.6	650.4	794	982.3	1074	1063	973.1	857.5	633.3	383.3	241.9	170.8	370.3	746.8	222.7	62.73	57.82	42.99	58.59	1356
118.4	123.8	146.8	324.4	783.7	1065	837.8	643.8	435	409.1	544.3	638.2	713.8	921.4	1034	1045	917	825.7	621	383	244.5	175.8	228.7	716.6	379.8	80.23	57.63	51.68	43	283.3
185	68.9	94.55	290.1	750.5	982.8	732.3	525.3	381.7	388.9	466	590	747.5	879.1	992.7	948.3	909.5	782.7	637.8	356.3	245.7	173.7	160.9	548	557.6	116.1	58.92	50.65	48.17	73.39	2538
163.7	94.97	135.9	320.6	719.5	1092	693.1	542.7	358.8	351.7	414.6	578.2	689.4	843.2	954.5	969.6	906.4	768.8	563.6	353.3	234.5	160.2	148.1	358.5	675.4	181.7	61.3	56.86	45.99	41.27	615.8
71.65	114.9	84.63	294.5	707.9	913.8	690.9	536.4	403.5	353.1	414.8	548.4	686.2	801.8	865.8	908.9	841.6	719.4	541.7	375	229.6	178.7	140.6	240.7	663.1	327	81.42	48.61	43.25	37.42	127.8
131.6	80.08	168.9	354.1	711.3	782.9	680.5	524.4	379.1	359.2	374.9	524.5	651.9	747	830	904.3	816.7	670.8	518.9	338.3	227.3	169	144	166.3	539.1	475.7	100.6	58.94	52.24	37.93	46.16
189.2	74.39	89.83	305.1	718.6	682.7	640	425.4	356.9	332.3	358.5	466.9	553.7	679.5	804.7	824.1	749.8	657.6	499.1	318.6	215.4	166.2	148.1	142.4	366.6	589.2	159.2	64.01	50.67	41.05	36.51	258.6
137.8	164.5	149.8	377.5	628.1	729.2	636.5	435.9	309.2	291.5	338.7	411	522.8	673.9	762.2	762.4	693.5	621.9	474.1	322.7	210.1	154.7	147.1	139.5	241	608.6	272.2	68.89	46.8	43.45	34.56	67.61
72.22	38.51	105.1	323.9	523	629.1	618.6	431.6	329.8	308.4	313.6	387.6	486.6	638.7	694.3	726.1	688.7	593.7	459.3	295.3	213.1	170.1	149.7	145.6	157.2	494.7	415.8	97.94	52.55	41.9	37.78	35.08	557.7
143	98.25	109.1	386.2	573.8	683.4	577.6	430.1	318.8	256.1	317.6	356.4	502.3	588.1	631.1	647.3	663	558.2	440.3	278.9	211.6	170.4	156.9	147.5	134.1	340.4	537	143.2	55.45	42.24	35.82	34.97	119.7
122.5	56.16	80.83	335.6	483.8	651.1	628.4	414	302.4	287.8	297.6	385.8	437.5	531.4	603.4	626.3	626.9	510	435.9	289.1	214.2	177.6	153	143.8	136.7	237.9	539.3	234.4	62.78	43.84	40.95	33.37	45	1202
120.1	81.91	119	199.8	453.2	610.8	519.2	346.5	295.6	279.7	301.6	347.2	389.3	509	595.2	586	551.2	463.9	391.3	281.9	204.2	169.4	157.8	147.1	141.2	164.5	458.6	363.6	87.75	47.03	42.43	35.21	36.85	239.7
96.38	72.77	188.2	298	393.7	423.1	481	360.6	279.5	264.2	279.2	300.3	375.3	477.7	578.5	588.5	565.7	467.5	389.5	261.6	197.4	165.9	152.6	143.5	136.5	133	331.5	468.7	123.8	54	46.94	38.41	30.29	64.52
29.75	78.04	71.22	282.5	405.9	509.5	449.5	293.2	246.9	282.8	265.2	291.7	349.8	443.1	505.7	518.6	509.8	445.3	378.6	275.7	200.3	169.5	164.3	151.7	132.4	124.3	229.7	486.5	209.9	58.78	51.65	40.52	34.19	35.29	519.7
128.4	112.8	106.4	178.4	430.3	460.2	444.4	322.5	243	261.3	239	276.4	360.8	428.7	473.6	496.5	463.2	411.4	329.6	288.1	192	172.3	165	149	134.5	129.2	162.6	434.6	305.9	80.59	50.02	38.79	36.4	31.66	109.3
79.1	71.98	43.99	185.2	372.5	509.6	379.2	266.3	237.9	205	233.7	259.6	311.2	373	443.4	500.5	448.5	408.4	326	235.1	207.1	176	163.5	145.9	138.4	135.8	138	345.5	409.9	113	57.88	44.3	41.95	32.67	45.63
226	72.71	45.45	135	375.5	468.1	416.3	257.5	213.3	223.1	257	248.9	311	334.5	431.7	476.1	442.2	395.2	329.7	239.3	203.7	181	166.9	157.1	150.8	135.2	125.5	227.3	439.4	178.7	59.06	55.07	40.64	40.67	34.63	216.3
330.1	133	67.33	153.2	380.4	374.2	378.5	299.3	213.2	222.9	219.5	234.5	281.1	346.4	415.1	421.9	401.6	386.7	297.2	229	204.9	176	166.7	154.4	152.3	136	131.7	153.5	406.3	274.4	69.73	53.1	45.55	35.03	31.82	57.4
547.7	80.26	22.87	183.8	312.4	369.4	349.1	334	247.1	224	215.4	225.8	239.2	367	374.3	385.7	403.7	374.7	302.2	235	194.6	178.1	159.8	149.7	150	134.9	131.2	127.2	333.6	343.6	103.8	59.77	52.79	47.21	33.98	30.78	487.4
	102	71.14	97.13	306.9	319.1	337.6	310.1	223.9	228.6	212.3	229.1	273.7	308.4	373.2	381.3	365.6	333.5	286.5	213.1	189.3	175.7	184.6	147.2	159.5	145.6	139.9	123.7	245.6	400	169	65.86	56.54	43.83	34.34	26.89	101
	68.51	50.04	99.19	301.1	284.3	341	270.7	198.7	218.4	223.1	208.5	244.9	272.2	318.5	360.6	345.1	331.4	286.8	222.8	194.7	176.2	178.9	168.9	155.7	148.7	138.8	126.4	161.9	385.5	248.9	79.97	56.98	48.37	37.61	28.9	36.33	979
	153.4	48.28	155	232.5	365.2	310.1	273.4	221.9	192.9	211.4	216.7	272.5	258.6	315	326.8	343.3	323.5	281.6	235.2	196.2	185.2	173.3	174.6	151.4	156.6	142.9	127.6	128.5	316.7	322.4	101.9	65.16	52.23	43.15	31.59	26.78	197.3
	313.4	59.09	265.9	333	349.1	276.5	253.8	237.1	215.6	202.2	218.2	207.7	261.3	319.3	312.4	343.5	294.5	261.6	218.7	191.9	177.5	183.9	171.5	169.5	158.8	149.2	133	130.2	243	375.1	154.9	66.15	52.33	42.5	31.16	24.55	49.08	1804
	791.6	75.8	211.9	316.1	404.3	296.2	261.6	255.5	196.1	201.1	225.6	218.8	255.9	261.8	323.7	306.3	301	280.2	225.8	188.3	182.5	180.9	186.5	166.1	158.9	151.1	142.7	127	177	382.4	213.3	79.59	61.51	47	33.51	23.99	27.59	416.7
	2279	82.99	151.8	291.4	319.5	296.1	258.1	220.5	196.3	179.2	171.7	196.7	253.5	292.7	311.5	313.8	288.3	264.9	222.4	196.5	176.9	181.4	173.5	168.6	154.5	147.3	137.5	138.3	150.6	320.2	288.2	101.4	68.21	45.98	34.17	27.44	22.85	81.48
		81.07	197.7	359.6	282.3	380.7	222.3	224.4	187.1	205.5	197.6	235.2	233.5	295.9	316.2	290.8	276.4	250.6	207.4	199.4	175.7	186.5	174	176.9	166	153.8	146	129.4	131.8	242.2	349.2	148.2	73.64	48.99	37.54	30.11	24.07	28.12	778.8
		219.7	171	261.6	308.4	403	276.1	228.6	186.2	211.3	203	212.6	227.5	241	310.4	291.7	273.7	243.3	208.8	186.3	175	172.8	181.3	177.4	163.3	162.6	138	132.9	134.3	175.2	347.3	200.8	78.5	56.47	40.47	30.08	18.91	21.87	152.3
		260	198.5	263.1	328.7	326.6	250.1	203.8	208.5	207.1	200.3	208.7	248.3	254.7	268.8	276.6	244.3	225.2	195.2	192.2	169.3	169.4	180	181.5	160.9	159	150.7	139.1	139.2	149	305.2	270.2	92.66	54.9	42.81	36.03	23.1	17.17	38.26
		867	173.4	256.2	216	307	280	232.4	237.3	201.3	167.4	217	225.5	258.5	291.2	287.1	275.9	245	213.5	179.2	166.9	181.1	174.4	184.7	179.2	166	150	140.1	136.8	143.9	239.2	315.3	134.4	63	44.29	31.06	23.55	18.25	19.64	328.6
		2025	146.7	285	243	320.1	252.6	233.2	222.2	198.8	199.9	205.3	239.8	266.4	277.4	282.1	257.9	241	203.9	170.6	183	179.3	176.7	170.8	169.5	164.4	149.7	142.2	144.6	131.4	176.9	336.9	177.1	74.69	46.67	33.2	27.73	15.67	16.43	63.65
			171.7	249.7	276.1	305.6	247.2	229.1	203.3	196.3	196.6	218.2	236.8	254.6	296	274.7	261.9	226.3	200.9	185.5	186	177.1	161.1	179	162	164.6	151.4	149.7	146	133	145.1	307.4	242.4	82.89	47.32	38.5	25.13	20.58	14.73	23.31	745.7
			180.8	208.8	206	296.7	245	272.3	218.2	193.7	215	219.1	239.2	266.1	261.5	272.6	241	210.3	194.5	173.8	181.8	179	177.6	187.2	172.1	163.2	159.7	144.7	148.3	135.7	137.5	248.9	290.4	101.3	49.53	39.94	27.24	20.75	13.57	14.67	148.3
			529.3	151.2	266.6	223	239.9	236.9	236.6	198.5	204.4	221	250.2	282.7	290.7	270.1	247.2	220.4	201.3	171.9	166.4	178.4	181.2	175.9	169.4	159.8	149	151	147.9	144.9	134.3	191.3	314.2	143.2	50.23	38.22	29.25	21.87	12.08	13.34	35.41
			1120	321.4	307.5	245.3	275	257.3	245.6	228.4	204.3	172.4	232.8	272.6	269.9	263.7	250.7	209	178.8	170.4	161.4	170	167.3	172.7	168.6	166.3	155.9	147.7	142.7	138.4	129.9	149.6	283.5	191.4	67.28	37.38	31.62	21.56	14.59	11.7	17.15	361.1
			2103	339.9	281.3	274.6	238.4	247.6	229.1	229.7	203.8	187.6	252.2	250.7	288.4	262.2	231.6	198.6	161.6	170.9	155.8	161.8	168.2	176.2	166.3	163.5	160.6	166.2	147.6	140.2	131.3	132.5	248.2	235.9	80.33	48.49	29.57	23.95	14.87	11.74	14.03	67.97
				203	292.4	244.7	250.7	266.9	228.2	224.9	202.6	196.1	241.9	254.8	281.6	250.4	213.3	212.2	169.8	165.4	155	174.8	151.9	158.6	170.5	157	159.2	157.3	148.3	148.2	136.4	127.7	191.3	268.6	111.2	49.74	33.31	18.92	16.48	12.29	11.59	20.61	660.8
				401.1	307.9	277.1	239.1	230.5	245.5	225.5	198.7	199.1	262.4	249.5	262.4	291.7	222.6	182.9	158.7	143.1	158.3	161.4	157.6	157.4	159.3	164.3	148.2	152.1	145	144.5	126.1	125.7	153	262.7	160	50.28	31.82	24.62	17.4	13.68	12.98	15.46	127.9
				673.8	273.8	354.2	232.5	246.1	234.3	201.7	184.3	190.9	244.3	253.6	274	243.9	220.3	201.3	159.8	162.1	146.3	159.3	153.9	163.3	150.1	159.4	151.3	150.4	150.6	137.2	135.1	129.3	127	222.1	200.3	65.6	37.33	24.55	15.91	13.6	11.57	12.14	28.6
				1723	380.9	258.5	307.1	246.3	217.1	193.2	175.8	206.4	242.5	281.3	266.8	270	215.9	190	154.7	154.3	145.7	149.5	145.4	161.9	147.1	155.7	157.8	149.1	150	144.6	142.2	128.7	120	184.2	224.4	89.05	36.03	24.77	16.73	13.65	11.58	9.046	14.55	274.7
					329.9	259.4	234.4	270.3	261	195.8	211.3	226.9	240.5	257.9	271.4	270.7	203.6	183.7	159.6	157.6	143.8	146.2	149.6	149.6	144.6	157.2	152.7	145.9	147.6	146.4	137.4	125	117.3	143.3	227.3	126.4	41.71	26.39	15.68	14.13	12.31	8.866	9.612	51.98
					248.2	262.3	241.4	215.3	274.9	187.9	207.1	208.7	206	240.7	244.9	277.7	213.6	164.2	146.3	152.2	144.3	142.7	148.8	154.6	154.7	154.6	144.7	143.8	150.2	135.5	134.4	124.6	110.5	115.4	204.4	153.4	49.09	27.57	17.39	14.37	14.09	8.154	9.6	16.41
					352.7	221.6	255.2	262.2	264.7	232.2	210.7	203	242.9	271.1	256.8	266.3	208.1	169.4	149.6	123.6	136.1	134.5	154.5	147.1	147.8	143	138.9	144.5	143.7	136.2	139.1	123.9	114.5	107.3	167.1	189.9	70.26	26.96	18.17	15.81	12.68	9.254	7.311	10.15	111.3
					1090	262.6	271	300.8	261.8	229.6	185.8	207.4	232.7	238.6	259.1	256.8	201.1	162.9	149.7	134.9	130	134.3	141.8	136.2	151.4	133.4	131.2	148.3	152.4	143	139.5	124.1	114	97.47	123.9	193.7	93.72	34.55	19.84	13.2	12.66	12.27	6.871	8.724	23.79
						203.3	222.7	228.2	236.6	221.6	185.2	207.8	251.5	262.3	287.6	242.4	195.1	140	142.8	121	132.9	131.7	137	131.4	139.9	134.4	137.1	137.3	145.6	139.2	129.7	124.5	110.8	99.18	102.1	175.1	118.8	34.58	21.15	13.96	12.7	10.39	7.807	6.59	11.45	256.1
						195.4	235.9	184.2	226.6	215.8	196.8	206.2	239.3	218.4	281.7	222.9	196.4	143.8	133	118.9	136.6	123.1	132.6	131.5	137.6	132.3	128.2	138.4	144	130.6	126.4	127.8	108	95.11	85.68	143.3	147.7	48.68	21.5	13.66	14.1	9.05	6.643	6.662	7.513	48.08
							215.8	212.3	236.5	199	183.2	201.6	217.7	270	265.9	250	194.2	138.8	126.3	118.6	121.1	127.4	126.1	120	126.4	134.5	125.1	130.3	140.5	122.2	121.5	120.9	103	96.25	79.65	110	159.8	61.7	20.38	15.39	13.63	8.325	8.123	5.909	6.958	14.15	556.3
							169	233.2	206.2	184.4	154.6	186.6	201.5	223.5	267.6	222.5	166.2	139.9	117.7	108.6	113.8	128.3	125.7	120	122.8	125.8	122.7	129.6	137.9	123.2	119.3	116.5	101.6	93.8	72.15	81	150	93.57	28.37	17.25	10.41	9.985	7.468	5.582	5.983	7.398	104.9
							229.9	223.1	227.6	187.7	182.8	209.6	224.4	230	210.1	210.7	163.4	115.7	124.4	104.8	110.6	110.6	122	118.1	120.9	119.6	116.9	125.5	127.1	129.1	120.4	115.9	103.1	92.8	70.83	68.48	124.8	111.6	37.71	15.76	13.14	9.417	7.795	6.482	5.895	6.819	21.1
							185.6	239.4	245	177.3	192.2	192.2	228.9	231	225.1	207.4	160.2	124.7	112	116	111.8	115.4	113	120.4	119.4	116.7	117.6	118.4	131.7	123.2	116.3	111.1	106.1	92.59	66.77	58.84	91.22	126	50.54	15.77	12.01	13.1	7.515	6.553	6.27	6.092	8.813	236.5
							209	235.4	200.6	192.9	193.1	175.9	230.8	222.2	235.5	210.8	153.5	134.9	105.1	106.1	97.78	106.3	110.3	117.3	117.1	112.1	110.8	118.6	119.7	111.3	112.3	105.3	105.3	87.35	64.31	56.81	64.59	123.7	71.36	17.24	11.31	9.09	8.427	6.798	5.62	5.238	6.488	43.61
							225.1	212.1	191.9	202.3	187.2	173.7	207.2	199.5	213.5	206	139.1	109.4	100.7	90.8	100.5	90.99	101.7	107.9	113.6	105.2	108.3	118.1	116.3	110	108.5	107.6	94.66	86.81	64.28	54.59	49.47	104.2	88.47	23.81	11.97	11.82	9.11	8.552	5.168	5.582	4.738	12.8
							468.6	219.5	198	178.7	175.5	173.1	200.8	207.4	217.6	200.8	132.9	117.7	96.73	91.18	90.41	99.88	91.55	100.4	107.8	101.7	102.9	100.7	115	102.9	103.8	103.8	96.09	79.22	66.52	50.53	43.35	82.46	102.9	35.64	11.2	9.216	8.346	7.355	6.741	4.632	4.361	6.506	99.21
								219.2	190	180	186.8	184.3	195.8	168.9	215.5	162.3	151.8	100.8	95.78	77.11	89.14	96.2	90.81	99.74	99.87	94.28	99.81	97.05	111.3	108.7	103.7	97.8	94.43	79.53	61.37	54.17	40.12	64.82	99.24	50.55	11.12	10.17	8.345	5.795	5.135	5.116	3.956	5.569	20.79
								195.3	175.8	161.6	160.2	167.6	194.2	209.4	196.3	174.7	132	110.3	84.03	81.51	76.16	94.33	90.73	89.91	94.98	91.96	92.84	99.89	94.85	100.8	95.48	96.06	85.53	73.87	64.27	49.87	40.12	40.62	95.15	66.52	17.34	10.82	7.57	5.711	5.406	4.71	2.568	4.849	6.482
								226.8	173.1	190.8	160.8	152.5	162.4	188.8	195.7	172.5	129.1	95.35	80.77	86.62	80.36	77.13	71.92	89.91	85.38	88.98	91.13	94.25	94.42	94.53	90.23	89.2	88.08	71.29	63.24	43.53	36.74	30.3	73.9	85.58	25.21	9.219	6.632	4.933	5.466	4.038	4.573	4.084	4.91
									191.3	175.2	156.4	154.5	173.2	185.9	193.7	163.6	135	96.73	76.68	67.74	77.18	76.47	76.45	88.7	89.48	89.09	87.12	83.3	93.66	90.34	88.6	82.55	85.35	65.3	61.72	41.45	34.67	28.09	56.57	88.15	36.57	10.73	6.098	5.476	5.1	4.062	3.854	3.848	4.478
									162.7	153.9	151.7	158.6	156.8	169.7	191.8	151.8	128.6	101.2	74.88	69.74	71.68	79.04	71.12	83.64	80.4	78.26	82.33	87.19	92.85	81.53	82.81	82.1	81.86	65.05	56.53	43.72	33.37	27.25	33.44	77.15	54.81	17.73	8.752	5.102	5.039	4.454	4.856	3.292	3.917
									181.2	162.5	158.7	181.8	175.3	154.9	177	143	111.4	88.39	70.97	69.04	76.36	68.37	75.41	83.35	71.27	82.53	67.56	70.21	77.08	85.51	78.33	79	74.69	69.64	50.33	43.98	33.79	27.02	27.67	68.63	62.89	17.78	8.075	5.993	5.153	4.221	4.375	4.649	3.356
									169	146.2	141.3	179.4	139.7	162.9	180.3	157.4	104.4	88.5	71.94	61.9	62.59	63.31	70.93	71.79	74.08	72.83	70.1	73.8	80.83	75.75	77.8	81.01	75.72	61.01	52.62	40.34	33.32	28.2	22.08	52.1	73.47	26.75	9.007	5.843	3.239	4.513	4.344	2.226	3.201
									175.7	151.6	131.3	135.3	144.4	163.3	163.2	145.7	97.54	75.78	66.7	62.04	56.93	55.96	63.63	69.66	67.83	67.84	71.53	70.84	76.95	78.65	77.26	74.46	66.33	58.48	53.41	42.91	29.42	24.44	17.99	35.25	67.55	40.57	10.53	4.936	3.972	4.149	3.996	3.384	3.084
									174.9	122.3	111.3	130.6	155.3	156.3	140.1	130.7	100.4	78.34	68.5	60.7	59.79	53.82	60.13	58.95	62.7	64.23	65.68	65.35	74.54	73.13	70.77	66.15	62.98	53.96	49.21	34.9	29.83	24.17	18.21	24.19	59.97	49.46	11.69	4.822	4.904	3.587	4.455	4.072	3.603
										135.3	126.6	124.6	127.1	146.8	144.2	125.8	95.7	76.62	59.64	52.1	60.11	53.35	58.33	60.37	58.73	56.18	60.52	63.29	66.15	65.38	69.37	68.26	59.56	54.07	37.3	37.18	28.99	22.15	18.42	20.51	49.9	60.38	21.35	6.808	3.386	2.86	3.026	4.13	2.994
										139.6	113.9	134.9	141	131.2	138.5	126.6	82.96	64.06	56.66	49.43	56.12	52.6	55.73	52.07	52.13	56.46	54.51	54.85	70.39	61.9	64.21	60.74	63.94	50.72	40.4	33.48	27.53	20.5	18.19	16	34.54	60.9	26.72	7.769	4.731	4.316	2.89	3.375	2.757
										118.7	105.3	114.3	117.7	121.5	138.4	112.5	78.12	68.52	58.59	51.45	51.24	55.23	51.51	55.45	48.77	52.05	57.23	51.73	53.68	55.73	56.45	58.69	54.55	43.52	41.48	32.34	26.98	20.73	18.19	12.19	24.13	60.5	38.42	8.744	4.934	4.5	3.436	2.776	3.285
										127.8	110.6	118.8	123.3	139.7	133.2	108.1	81.85	59.49	53.14	50.12	50.96	50.68	46.62	49.69	45.62	53.49	52.09	52.52	58.67	56.91	52.34	57.74	52.73	44.31	35.74	35.2	28.4	21.18	17.94	12.17	16.37	49.77	44.64	13.57	5.44	3.658	5.327	3.55	4.154
										142.2	118.8	129.4	111.9	127.4	117.9	97.67	85.61	58.09	56.55	50.09	43.77	46.39	47.11	42.84	50.21	44.45	48.14	56.98	55.31	53.94	54.13	45.33	44.52	41.17	39.11	31.07	27.59	20.45	13.84	11.73	12.28	31.07	55	23.03	5.442	4.272	4.056	3.027	3.723
										326.8	113.1	118	116.4	135.3	106.6	103.5	74.02	61.31	52.37	44.96	40.31	43.54	43.19	45	47.04	46.88	44.71	43.89	50.62	50.27	51.67	47.75	44.33	46.99	35.57	29.11	24.35	21.81	15.1	13.19	10.26	21.8	49.58	30.17	6.589	3.69	3.475	2.309	3.169
										1298	102	98.51	113.9	123.8	113	93.31	71.96	58.86	42.03	39.35	34.95	38.31	42.63	43.52	41.17	44.78	44.98	41.98	52.8	45.97	50.43	47.42	43.17	37.97	34.53	28.42	22.22	19.38	13.42	10.77	10.06	15.72	42.25	43.06	9.15	5.644	3.984	3.324	3.046
											125	101.8	114	124.5	105.7	83.99	64.45	48.51	40.48	40.79	37.49	37.54	41.27	41.18	39.67	45.39	40.78	42.66	43.71	45.88	45.59	42.83	36.78	36.69	35.06	30.72	21.54	16.58	13.8	13.71	11.27	12.46	32.53	46.55	16.66	6.176	3.848	2.679	2.666
											126	118.9	103.5	104.7	92.15	80.75	71.68	49.04	34.77	39.81	31.43	38.47	35.14	39.62	38.1	39.84	39.75	39.9	41.12	42.25	44.81	44.91	38.51	36.66	35.19	25.78	22.73	19.58	11.56	10.94	11.22	9.119	20.68	41.56	20.57	6.747	3.156	2.801	3.489
											139	99.62	103.1	98.49	105.9	77.99	67.96	40.9	42.76	35.9	36.29	37.75	37.93	39.82	37.34	34.91	36.39	40.27	36.44	44.09	40.14	42.54	35.4	34.64	29.54	23.77	22.04	17.84	13.38	10.64	11.67	8.847	13.88	37.92	26.78	8.161	3.863	2.86	4.387
											271.7	94.41	98.9	94.24	95.74	82.1	61.34	51.39	43.47	37.16	34.13	34.34	34.78	34.31	33.47	34.4	30.3	36.44	34.4	38.63	40.01	35.28	37.39	29.95	29.84	23.18	18.06	16.12	13.85	11.57	11.35	7.433	8.686	30.83	39.61	12.6	3.389	3.484	3.15
											1044	75.64	94.66	92.53	93.69	76.95	65.85	41.7	37.9	32.59	37.03	32.5	31.18	36.04	33.4	30.93	32.83	32.81	32.88	33.29	35.69	40.76	32.52	30.53	27.57	23.71	17.06	14.5	14.21	9.667	9.956	8.852	8.642	20.83	37.96	16.8	6.082	2.99	3.412
												106.4	88.02	83.61	81.49	73.1	64.47	42.8	28.44	33.96	28.63	30.74	27.35	32.32	27.99	30.95	30.85	32.35	34.9	34.53	34.22	35.6	32.56	27.88	26.14	23.49	16.92	12.95	11.42	9.398	10.29	7.941	6.599	16.54	34.96	24.73	7.396	3.062	3.747
												105.7	92.87	84.83	91.2	61.47	47.34	35.63	31.03	29.74	31.05	32.79	28.63	31.83	29.8	25.49	28.33	30.7	33.06	32.73	33.26	30.13	32.02	29.38	25.18	22.04	16.47	14.77	13.64	11.14	8.432	7.997	7.748	12.02	32.4	30.08	9.841	3.062	4.036
												113.3	91.04	80.19	78.21	73.91	48.4	39.09	29.54	29.99	26.27	27	30.73	26.37	24.39	27.83	30.85	32.39	30.03	30.79	33.18	29.45	25.14	24.71	21.63	19.58	18.49	13.91	11.92	9.808	7.433	7.979	6.608	7.466	24.83	32.22	13.73	4.152	2.877
												238.6	99.11	84.87	75.2	75.73	53.24	40.3	31.91	24.1	25.65	25.77	28.29	28.71	27.36	25.74	27.63	27.77	29.76	30.9	31.92	27.03	27.03	26.96	24.47	20.93	16.08	12.71	11.05	10.51	7.905	8.371	6.916	6.539	16.72	32.69	20.23	5.252	3.332
												886.9	84.59	68.24	83.25	70.54	52.41	35.39	30.02	27.49	22.38	26.8	23.74	25.6	25.43	24.63	24.8	26.29	30.77	31.24	28.25	24.93	25.76	25.22	23.27	20.45	14.44	12.67	8.932	8.573	7.796	6.821	5.299	6.042	10.48	29.06	24.35	6.951	3.291
													103.8	66.11	69.28	56.57	50.54	34.65	26.12	30.7	24.8	23.06	19.81	23.39	23.28	25.4	23.04	21.77	26.84	26.36	27.1	25.1	23.98	23.29	20.6	16.84	14.14	11.8	11.33	7.071	6.049	7.398	6.044	5.348	7.774	22.3	32.11	9.502	3.053
													83.71	84.63	80.59	50.24	45.35	30.47	26.09	21.06	22.18	25.03	19.22	21.98	23.78	22.66	26.73	22.67	25.93	23.75	25.42	25.6	21.15	22.83	19.87	17.01	13.84	10.7	10.61	6.022	5.933	7.547	5.555	5.728	6.404	18.14	32.14	14.4	3.94
													99.77	75.2	72.94	56.22	36.7	28.8	27.89	21.18	21.86	23.23	17.23	23.69	18.89	25.4	19.45	18.9	24.51	19.75	22.22	21.58	24.5	19.85	17.97	16.96	13.27	13.07	9.218	7.439	9.087	6.939	6.526	6.511	6.67	11.04	26.93	19.61	6.308
													162	67.32	63.68	59.16	42.32	26.36	22.2	23.7	21.01	17.92	19.9	18.88	18.66	17.95	19.67	18	22.86	21.28	23.64	21.23	21.76	19.67	17.47	14.74	14.22	12.13	10.28	7.504	7.855	6.27	5.993	5.282	5.421	8.28	22.32	22.37	7.1
													702.7	68.93	69.16	56.21	40.28	28.79	25.83	19.77	17.63	19.63	18.25	17.51	19.78	17.8	19.2	21.52	19.86	19.76	25.11	19.83	20.52	18.02	16.89	15.69	11.39	10.42	9.712	9.059	7.19	7.062	4.351	4.639	5.084	6.514	18.94	26.62	12.22
														82.24	54.75	53.5	40.31	24.52	18.93	19.63	20.17	15.44	20.08	19.16	17.59	17.27	16.21	16.13	17.41	20.31	21.97	21.54	18.23	19.08	14.11	13.2	12.48	9.364	10.02	7.177	6.115	5.196	3.476	4.682	4.265	4.782	12.76	23.86	14.73
														73.33	72.55	49.94	39.59	24.79	19.65	17.24	14.15	17.29	16.69	17.87	17.87	15.18	14.75	17.89	13.82	17.66	17.68	16.83	16.62	18.1	14.52	12.17	11.4	8.975	8.112	7.339	6.461	4.589	4.517	3.328	5.01	4.514	6.898	20.38	18.16
														81.07	71.4	51.94	36.87	27.94	20.7	15.29	14.98	12.53	13.93	16.83	16.93	14.63	16.16	18.44	16.85	18.28	17.04	19.52	18.08	15.08	15.37	10.23	9.983	8.717	9.336	6.311	5.036	5.383	4.681	4.935	4.772	3.715	4.672	17.46	20
														150.4	56.02	50.58	32.83	24.7	19.81	17.34	18.06	13.66	14.18	16.88	15.87	14.59	18.13	18.05	18.04	15.34	12.67	14.47	16.66	12.9	13.21	10.51	8.322	8.885	7.909	6.671	5.793	4.383	4.266	3.266	3.596	3.716	4.042	13.68	24.13
														597.7	63.76	48.26	30.32	28.73	15.92	15.7	17.28	14.79	14.69	16.27	15.72	13.87	15.98	14.71	16.4	17.86	13.79	13.12	15.54	12.34	12.21	9.062	9.003	8.167	8.608	7.287	5.96	4.3	4.421	3.123	3.013	4.112	3.937	8.303	20.99
															63.21	45.15	40.54	23.43	16.83	15.93	13.56	15.17	14.18	13.27	16.76	13.64	11.57	13.07	13.57	14.63	13.95	15.22	15.04	12.54	12.06	9.932	8.726	7.843	7.935	6.992	4.61	5.793	4.796	4.817	2.614	3.659	3.965	5.435	16.98
															54.58	44.87	26.24	19.62	15.62	13.51	12.4	11.58	12.09	14.68	14.27	11.12	11.54	15.11	14.53	11.48	15.47	13.4	12.21	13.57	11.92	9.684	7.01	6.893	5.564	5.343	4.801	7.7	4.113	3.948	2.994	3.161	3.987	5.185	14.32
															65.11	47.41	32.19	20.07	14.93	12.26	11.09	18.44	13.27	10.8	12.51	11.62	14.08	11.93	11.91	14.34	13.45	14.16	12.21	11.76	8.1	9.768	6.833	6.779	5.436	4.972	5.41	4.86	3.456	3.778	3.682	3.943	3.513	3.577	9.19
															120.9	37.58	33.45	24.37	18.31	12.35	10.98	12.2	10.22	12.13	13.69	12.06	10.83	12.34	11.06	14.42	15.24	12.57	12.57	9.827	8.709	7.473	8.729	7.386	4.854	5.09	4.182	3.81	3.01	4.12	2.989	3.933	2.646	4.05	5.44
															424.7	40.87	34.08	21.01	13.78	14.91	14.27	9.718	10.08	11.46	10.41	11.01	10.43	12.03	10.35	12.21	10.69	10.33	11.14	9.725	9.138	7.85	6.521	6.172	6.891	5.741	4.777	4.216	4.633	3.634	3.147	3.405	3.728	2.663	3.991
															1254	34.42	30.57	17.34	13.51	15.69	12.66	11.19	9.825	8.977	10.71	10.13	7.236	11.12	12.29	11.02	10.81	11.38	11.79	9.664	7.426	8.248	6.446	6.638	4.319	4.817	4.658	4.153	4.942	3.976	3.756	3.42	2.882	3.038	2.421
															3018	44.5	31.21	19.21	14.66	15.96	10.84	11.27	8.643	11.25	9.815	10.97	8.74	10.55	11.17	9.936	9.868	11.15	11.8	7.389	7.398	7.044	5.65	6.844	4.968	3.842	3.737	3.705	3.088	3.018	2.857	2.139	3.114	2.819	2.901
																45.89	32.75	21.03	11.99	12.08	8.584	12.95	8.04	10.07	8.595	7.84	9.053	10.63	10.42	11.27	9.609	9.708	9.519	10.19	7.566	6.556	5.614	6.129	4.044	3.59	4.023	3.011	3.201	3.663	2.403	3.354	2.69	2.273	2.182
																87.51	28.41	17.79	14.08	13.07	9.432	11.84	6.153	8.67	8.611	8.503	8.237	9.828	8.332	8.122	8.889	9.058	10.69	8.362	6.84	8.056	7.076	5.257	4.5	4.584	4.679	2.422	3.36	3.256	3.033	2.574	3.347	2.063	2.251
																312.3	26.07	20.2	15.57	10.11	11.85	10.42	9.633	9.307	10.19	10.05	7.427	7.815	8.294	8.257	9.573	9.571	7.563	8.305	5.185	4.408	5.969	5.168	3.941	3.775	3.757	2.916	2.837	2.511	1.534	2.64	2.766	2.065	2.877
																902.1	26.56	22.3	13.82	8.647	9.466	7.632	9.11	8.278	6.805	7.676	7.905	6.649	9.311	8.065	9.435	8.126	8.236	6.988	5.651	4.686	5.265	4.95	3.984	4.647	4.042	3.934	2.953	2.983	1.927	2.413	2.336	1.901	1.864
																2059	25.12	21.33	12.73	10.08	11.62	8.883	10.25	6.679	5.784	7.15	7.585	8.35	7.882	7.182	8.401	8.576	6.6	7.938	5.399	6.093	4.234	3.948	4.224	3.637	3.839	3.749	2.852	2.456	1.724	1.756	1.98	2.057	1.593
																	33.94	16.66	11.35	10.71	7.576	6.959	6.736	6.228	6.785	6.651	7.661	5.959	8.373	7.244	6.31	7.114	7.957	8.377	6.551	5.35	3.387	4.573	3.109	3.373	3.76	3.392	3.601	2.255	2.291	3.056	1.758	2.482	1.633
																	66.41	19.97	12.11	11.38	7.354	8.783	7.575	7.131	7.061	6.294	6.891	9.032	8.108	7.882	6.283	5.867	6.659	6.275	5.362	3.628	4.362	3.875	3.79	3.904	3.8	2.97	2.914	3.234	2.68	1.837	1.874	2.525	1.88
																	206.6	19.11	13.04	11.28	8.002	9.269	6.58	6.821	5.594	5.574	6.841	5.709	7.269	6.319	7.019	6.37	5.977	7.814	5.945	4.041	4.358	3.846	3.069	3.307	2.917	3.198	2.1	1.802	1.977	1.679	1.12	1.283	1.818
																	606.9	18.13	12.77	9.266	6.611	12.57	7.26	7.125	7.705	6.612	6.422	5.911	6.978	6.067	8.01	6.018	5.578	5.497	5.896	4.216	3.961	3.311	3.234	2.84	2.25	2.501	3.253	2.384	2.855	1.648	1.794	2.726	1.947
																	1414	16.2	15.4	14.12	7.472	10.36	5.866	6.129	6.733	7.839	6.615	7.205	6.188	4.537	5.516	5.189	5.268	6.769	5.035	4.208	4.114	2.903	3.409	3.376	2.941	2.739	3.088	2.37	1.717	1.273	2.005	1.98	1.7
																		20.33	13.82	9.608	9.083	5.494	8.311	5.044	5.51	6.995	6.418	4.879	5.541	5.156	7.008	4.452	4.154	4.558	4.251	4.529	3.783	2.858	2.381	2.91	1.779	2.102	1.619	2.1	2.165	1.334	1.717	1.1	1.797
																		48.34	11.31	10.82	6.609	7.313	8.457	4.193	5.655	5.406	4.964	4.72	6.497	6.323	4.212	3.4	3.995	4.632	3.459	3.645	3.909	2.646	2.979	2.291	2.023	1.246	1.847	2.685	1.012	1.75	1.724	1.557	1.922
																		147.4	12.02	9.013	7.388	9.138	9.28	6.054	5.093	5.313	5.628	5.29	5.976	6.087	6.301	3.9	3.571	4.006	3.37	4.267	4.706	3.77	2.944	2.657	2.24	1.762	2.408	2.337	2.098	1.327	1.529	1.978	1.778
																		457.4	9.46	11.16	7.529	7.02	6.978	7.423	5.492	5.413	5.467	5.443	5.491	4.853	4.129	4.372	4.894	4.931	3.937	3.67	3.441	2.331	2.338	2.647	1.936	1.752	1.687	1.252	1.817	2.105	1.867	1.476	1.666
																			15.22	8.497	7.122	6.993	5.634	5.137	5.486	2.847	5.136	3.701	5.026	5.41	3.558	4.128	4.782	4.055	2.812	3.218	3.161	2.654	1.943	2.347	1.669	1.987	1.648	1.441	1.874	1.141	2.278	1.049	0.901
																			16.19	12.89	8.094	4.872	5.193	6.444	5.073	3.356	4.208	6.175	4.523	3.801	3.251	3.25	4.453	4.495	3.162	3.072	3.018	2.924	2.105	1.544	1.489	2.109	1.568	1.336	1.417	1.125	2.432	1.617	0.62
																			39.42	11.91	12.05	6.885	6.221	6.169	4.57	3.69	4.649	5.657	3.966	3.694	4.042	3.802	3.501	2.803	3.053	3.504	2.619	1.748	1.795	2.961	1.952	2.097	1.992	1.289	1.363	1.284	1.572	1.651	1.439
																			125.1	12.07	9.321	7.923	6.256	6.117	4.823	4.191	5.406	2.8	3.659	3.991	2.779	3.237	3.811	3.624	3.69	3.298	2.928	1.876	2.37	2.156	1.127	1.236	1.24	1.622	2.207	1.211	1.146	1.396	1.259
																			346.9	8.722	9.807	3.865	7.586	4.457	3.301	4.361	4.531	3.821	3.394	3.842	3.935	4.083	3.51	3.991	4.131	2.862	3.271	2.692	1.604	1.711	1.05	2.236	1.033	1.285	1.232	0.885	1.317	1.1	0.868
																			769.7	10.2	8.334	5.746	7.03	4.174	3.701	4.62	3.644	4.255	3.345	4.177	4.147	2.955	4.29	2.271	2.555	3.304	2.777	2.824	2.047	0.88	1.136	2.092	1.297	0.859	1.061	1.281	1.187	0.483	1.153
																			1470	9.374	7.052	7.32	6.249	3.133	3.91	3.573	3.475	4.047	2.517	3.416	3.726	3.823	3.296	2.969	3.053	1.906	1.834	1.236	2.341	1.071	1.368	0.839	1.696	0.852	1.299	1.668	1.312	1.722	1.024
																			2257	32.4	8.332	6.327	5.184	3.815	4.089	3.111	3.024	4.036	2.814	3.758	3.615	2.404	3.273	3.298	2.43	2.784	2.417	2.101	1.808	1.81	1.856	1.73	1.106	0.944	1.379	1.017	1.101	1.236	0.58
																				92.24	8.352	6.157	6.726	6.616	3.847	2.395	3.144	3.601	3	2.77	2.45	3.672	2.096	3.193	2.53	1.651	2.071	2.361	1.474	1.347	1.638	1.358	0.784	0.83	1.518	1.005	1.289	1.073	1.442
																				268.8	8.585	6.788	5.161	4.757	2.938	3.641	3.173	3.266	2.249	2.906	1.637	2.346	2.588	1.92	2.286	1.772	2.242	2.46	2.867	1.636	1.25	1.252	1.055	0.91	1.136	1.158	0.643	0.464	0.993
																				596.5	7.469	5.425	4.606	3.275	5.454	4.5	3.419	2.828	2.533	3.632	2.829	2.155	2.832	1.708	1.874	1.714	1.371	1.429	1.996	1.625	1.302	1.014	1.168	1.227	1.185	1.409	1.181	0.981	0.863
																					9.434	4.451	5.059	4.37	4.835	2.008	2.93	3.512	2.442	2.508	2.911	2.766	2.858	2.377	3.146	2.866	2.116	1.062	1.481	1.35	0.773	0.678	0.946	0.59	0.875	1.324	1.084	0.846	1.065
																					26.89	6.534	5.433	4.143	4.055	2.754	2.961	3.859	3.151	2.357	4.088	1.383	2.803	2.752	1.409	1.502	1.451	1.549	1.223	0.873	1.453	1.782	1.351	0.915	0.671	1.242	0.947	0.691	1.239
																					73.58	7.717	4.875	3.691	3.554	5.225	3.059	3.731	2.17	2.061	3.083	2.435	1.536	1.82	1.482	2.278	1.38	2.241	1.546	1.05	1.041	0.996	0.362	1.22	1.344	0.646	0.924	0.727	1.126
																					205.6	6.668	4.283	4.044	4.495	2.905	3.137	3.103	2.445	2.398	2.223	2.734	2.19	1.853	1.466	2.001	1.386	1.454	1.148	1.04	1.064	1.152	0.818	0.997	0.568	0.8	0.532	0.755	0.573
[truncated: 1 more columns]
