# Supplementary material for: Utilization and transformation of Chrysotila dentata-derived dissolved organic matter by phycosphere bacteria Marinobacter hydrocarbonoclasticus and Bacillus firmus
Source: PeerJ. 2024 Jan 4;12:e16552. doi: 10.7717/peerj.16552 (PMC10771764; doi:10.7717/peerj.16552)
Supplement: Supplemental Information 8 [file peerj-12-16552-s008.xlsx]

## Sheet: Sheet1
36.02	82.88	90.6	110.6
-1.399	95.39	97.91	170.5	296.4
29.42	76.85	104.2	242.1	162.1
9.245	109.6	137	305.6	287.5
64.02	197.3	118.5	292.3	444.6	385.6
25.5	174.1	106.6	226.1	495.3	285.6
41.88	37.16	49.19	188	440.9	468.3
56.59	83.53	90.6	78.52	326.1	849.7	282.9
125.3	121.7	143.9	64.58	217.8	809.5	367.8
209.7	163.9	128.1	116.8	196.7	789.6	674.7	500
166.6	132.6	171.6	163.9	80.79	512	853	290.8
170.4	92.2	164.2	122.3	119.4	287.1	900.7	471.7	1012
94.65	92.2	185.9	171.7	131.7	151	797.1	719.7	315.9
227.9	89	233.1	131.4	205.9	190.3	558.9	1008	341.2
282.7	125.6	130.6	117.9	124.4	149.4	303.6	1048	544.1	560.6
127.5	132.1	137.4	170.4	99.14	98.08	199.3	926	785.5	299.5
135.2	159.5	114.5	105.5	188.3	127	120.4	572.2	1136	356.9	1243
106.8	183.6	171.7	152.4	115.6	158.1	93.82	298.9	1231	575.6	344.3
179.1	200.9	220.8	128.7	187.8	95.86	89.95	126.1	920.8	1061	265.3
88.79	208.7	148.6	233.4	154.3	102.6	85.39	93.89	577.6	1285	390.4
180.1	157.1	196.8	197.7	138	100.9	77.31	53.43	281.1	1335	668.5
129.5	159.4	259.8	200.9	157	132.5	62.43	76.12	144.6	1043	1178
400.2	132	167.4	194.9	127.7	193.2	107.1	61.95	84.51	576.3	1560	388	361.4
269.6	122.5	99.24	242.3	88.17	159.5	125.9	63.88	105.2	287.6	1468	796.7	204.3
171.9	246.1	194	215	156.3	231.4	108.5	103.6	87.06	141.6	1136	1203	212.5
177.4	230.5	286.6	177.5	308.1	256.8	141	77.12	99.51	114.5	679.1	1591	425.9	281
306	219.4	188.8	315.3	306.4	254.5	165.5	106.6	90.35	99.4	315.9	1528	826.3	243.2
214.1	118.2	284.1	243.3	276.8	288.6	170.9	85.99	75.41	79.46	176.6	1206	1317	303.4	465.9
153.9	111.3	235	385.1	541.1	379.2	207.2	132.6	91.53	73.89	147.8	708.7	1885	511.6	321.4
202.2	205.8	171.4	452.8	397.7	392.2	254.3	145.5	101.1	90.21	123	375.8	1779	955.4	311.7	852.4
279.1	167.3	196.1	267.6	429	564.7	294.8	139.1	98.94	97.18	107.1	253.4	1411	1536	404	432.5
274.6	138.7	237.1	338.6	599.1	666.1	327.4	174.4	120.2	115	122.6	187.2	853.8	1985	600.5	349.5
314.2	159.5	250.9	290	439.5	645.8	432.7	210.4	134.9	101.7	118.9	172.9	500.7	2080	1056	388	533.7
228.3	208.3	132.4	329.1	575.5	521.5	473	236.6	155.8	120.4	158.2	182.6	324.8	1594	1694	475	397.2
181.4	228.6	284.2	335.8	497.6	692.6	444	252.7	186.3	135.4	159.1	210.6	261	960.5	2206	644.8	389.6
186.5	257	227.9	455.7	641.8	696.7	498	301.5	151.5	131.4	179.1	233.6	287.7	626.4	2244	1110	416	377.2
145.8	194	153.8	327.5	630.9	740.3	472.8	319.5	148.7	135	194.4	244.2	285.9	459.1	1812	1772	481.2	312.8
215	149.9	159.8	254	683.9	835.4	517.9	343.1	168	174.1	251	257.3	317.7	442.4	1251	2220	683.7	323.6	382.4
201.8	127.1	262	293.8	549.9	752.3	656.9	376.3	229.6	155.9	207.9	280.9	403.6	477.1	839.2	2292	1078	366.9	260.2
210	86.18	193	279.1	721.7	662.5	601.1	408.4	229.8	231.8	285.2	317.4	441.2	523.2	687.4	1930	1695	431.8	247.6	476.3
183.8	106.9	215.8	313.6	533.7	827.9	565.8	463.9	263.4	225.9	319.7	383.6	537.4	537.1	646.3	1373	2123	620.6	262	226.4
135.9	140.3	193	347.5	640.1	941	656.9	421.6	315.1	315	354.9	408	566.7	653.4	706.3	1058	2198	948.3	290.1	191.6
162.2	190.6	184.3	332.6	684.7	844.2	626.5	473	358.5	272	417.8	486.3	674	731.1	791.6	869.1	1874	1487	350.2	187.7	241.2
210.9	157.3	136.6	367.8	843.2	918.3	769.9	483.8	339.9	371.6	465.9	603.6	668.4	754.2	914.3	897.2	1412	1915	513.8	209.8	159.7
184.1	115.6	206.5	512.8	959.7	1045	778.5	527	364.2	354.3	477.4	634.1	796.8	833.6	954.1	910.6	1056	2064	820.8	223.9	149.4	306.6
221.7	63.82	347.8	487.7	987.2	1190	833.9	529.3	429.4	409.5	568.7	708.9	861.1	1004	1075	993.1	957.5	1793	1256	268.3	161.7	143.8	2775
257.3	131	202.3	573.4	1018	1138	951.6	592.7	429.3	415.4	620.2	721.9	964.9	1017	1161	1088	915	1367	1668	416.3	163.9	112.5	586.4
147.6	129.1	257.4	590.4	907.2	1192	887.6	602.5	420.4	499.5	648.7	791.5	955.4	1156	1141	1156	919.8	1006	1734	661	179.1	115.4	172
49.11	123.4	225.4	579	1236	1248	865.6	616.7	444.8	469.5	698.3	782.2	1070	1141	1211	1160	927.5	816.9	1511	987.5	198.8	113.2	104.7	1100
129.9	175.9	223.1	555.2	1112	1153	977.4	634.8	514.9	500.4	694.2	878.8	1064	1129	1200	1220	919.3	768.4	1136	1316	308	108.5	83.91	242.6
235.6	97.12	150.9	510.4	1128	1098	939.2	618.4	449.4	543.7	662.9	852.1	1088	1212	1152	1237	962.2	773.7	811.6	1443	499.8	109.2	94.27	99.75
227.1	235.9	155.1	731.5	1284	1114	894.6	628.9	466.7	540.8	664.3	850.4	1025	1237	1182	1188	991.4	777.4	623.6	1247	749.9	147.4	89.95	83.7	414.3
113.1	239.5	116.9	736.6	1326	1127	873.7	613.4	465.7	535.9	730.1	810.1	1054	1220	1148	1199	1036	793.4	597	894.3	1039	215.2	83.92	75.97	118.5
107	239.6	236.4	643.7	1273	1232	893.5	691.4	506	470.2	676.3	871.9	1045	1216	1247	1220	968.1	800.3	573.4	579.9	1132	385.1	83.16	78.26	71.23	773.3
108.3	214.8	145.2	485.6	1095	1305	917.8	623.2	463.5	508.3	651.3	832.4	999.1	1153	1207	1194	976.4	772.7	558.7	441.5	1011	611.4	103.6	74.59	64.02	170.2
195.8	247.6	147.6	374	1166	1149	785.5	633.8	485	471.6	647.1	824.6	990	1127	1123	1171	942.9	747.4	544.9	364.1	722.3	873.3	167.8	77.18	62.79	72.35
77.84	158.6	195.1	404.6	998.5	966	854.8	600	486.1	502	547	824.2	915.8	1065	1182	1086	914.8	737.1	497.8	354.9	441	949.7	302.5	80.79	76.84	65.08	274.7
104.2	72.54	218.8	447.4	935	1055	814.2	549.7	420.1	489.2	557.6	734.8	891.6	1048	1121	1097	876.2	717.7	490.9	322.9	296.2	843.7	493.6	83.11	63.28	55.46	88.86
135.8	147.7	194.3	344	1026	1006	741.4	532.7	454.5	443.3	553.6	735.8	862	967.3	1051	1023	862.2	700.4	476	301	218.4	603.7	748.5	137.4	66.22	64.23	55.57	448.1
103.7	168.1	102.8	381.8	959.9	884.8	773.1	531.6	432	425.6	568.1	714.5	850.9	980.4	996.1	972.8	811.5	680	489.1	314.4	213.1	361.3	834.5	242	74.18	57.71	55.29	110.8
68.37	73.37	129.7	432.2	843.6	975	736.5	481.4	451.9	411.1	532.1	662.7	814.9	945.3	931.7	948.6	787.8	665.1	454.5	287.3	205.3	227.5	761.1	420.7	91.37	57.92	52.82	61.35
165.6	169.6	77.47	345.9	784.5	895.8	675	436.4	368.2	410.4	529.4	605.1	798.5	901.7	872.1	915.3	765.4	616.7	455.8	292.3	198.5	168.7	577.8	621	125.3	59.36	53.31	46.64	169.3
101	198	89.48	349.5	659	805	783.7	445.9	393.9	404.8	459.7	601.4	775.7	866.4	849.4	836.2	730.2	613	440.1	294.1	191.7	145.6	345.7	735.8	230.2	67.96	51.54	46.99	64.77
86.94	109.6	140.2	334	739	787.3	645.7	465.7	381.4	388.8	377.4	599.6	675.6	798.7	872.3	794.6	732.6	572.6	419.2	276.1	193.1	144.5	214.2	701.7	380.7	76.44	60.71	51.13	42.36	294.4
176.6	102.4	113	247.5	571.9	825.7	579.8	427.1	343.7	372.1	404.2	538.7	662.3	771.6	793.4	745.6	644.6	566.2	415.8	263.6	188	150.8	151.5	546.9	537.9	110.1	56.59	53.68	40.84	75.86	2539
163.8	59.85	103.6	287.2	569.5	749.2	552.5	387.5	340.1	313.3	418.8	481.9	585.2	700.7	765.1	698.8	634.9	517.5	401.2	249	187	147.2	119.4	344.4	671.3	186.8	58.74	47.61	40.73	42.57	615.8
104.3	57.07	85.14	229.4	419	697.4	553.3	383.9	323.2	308.6	388.9	468.4	547	650.3	705.7	703.2	593.3	466.5	383.6	253.1	171.9	140	124.4	212.9	643	319.9	78.12	48.64	49.22	36.04	130
27.68	97.07	139.4	236.5	392.8	604.1	550	393.8	262.9	286.6	347.4	403.6	559.4	631	698.8	641.9	554.8	477.8	388.6	243	178.9	159.2	134.5	161	535.3	477.4	97.85	56.17	44.69	39.66	50.06	1369
57.63	184.2	55.43	206.8	488.4	559.5	470.8	327.9	263.9	304.7	338.2	380.8	462.8	585.2	612.7	599.4	531.1	442.4	341.2	250.4	179.9	148	127.4	135.7	346.3	592.6	168.8	61.9	49.2	35.46	36.42	278.6
143.7	73.16	80.72	198.5	361.9	482.9	440.6	354.9	264.5	263.6	322.5	366.5	440.8	531.4	589.6	577.9	485.2	458	339.7	252.8	184	152.9	129.1	126.8	221.1	589	275.2	68.37	45.19	39.94	37.9	70.34
87.98	267.8	113.6	235.4	298.7	493.5	363.4	322.3	208.1	234	282.3	323.5	449.6	483.1	564.6	587.3	481.9	386	321.7	218.7	156.4	152.3	125.2	118	143.8	473.4	414.6	86.5	54.67	38.68	35.28	38.58	592.6
147	106.7	151.9	181.6	462.7	420.4	404.9	294.7	255.5	274.6	291.8	318.3	353.3	469.3	542.1	509.5	458.5	388.7	310.1	217.1	166	145.8	121.2	121.6	125.6	342.4	516.4	145	48.63	38.99	37.15	28.94	120.9
132.1	52.28	143.2	57.8	375.7	431.7	326.4	265.2	230.1	244.1	250.7	290.1	317.3	448.4	496.9	509.4	419.2	374.3	312.6	205.5	171.3	152.5	127.5	123.6	117.6	218.3	531	242.2	56.79	41.12	33.17	29.96	46.05
159.4	151.6	93.11	194.7	256.2	466.2	393.7	229.1	234.2	223.3	247.8	281.1	345.9	425.6	469.8	456.6	405.2	352.6	292.5	233.7	157.3	152	134.4	128.4	113.7	152.9	449.8	349.8	80.3	46.67	34.19	28.02	34.33	258.9
61.33	181.9	42.5	145.5	421.7	343.7	267.7	241	207.7	207.5	225.2	287.2	332	358.3	400	422.4	360.9	335.1	266	203.9	170.2	150.7	131.3	129.5	119.1	116.7	316.1	472.4	125.2	41.66	36.87	31.01	28.98	65.5
92.46	93.78	27.49	100.2	366.6	301.7	376.4	303.8	209.9	202.2	259.6	272.9	304.4	332.5	365.7	387.4	383.1	320.2	258.1	199.8	167.4	151	129.5	130	110.8	107.5	210.7	465.3	195.9	51.41	35.85	31.89	23.68	35.24	571.2
61.29	20.73	111.3	111	258.1	282.9	305.7	236.9	208.5	184.7	231.6	223.2	274.1	344.1	359	352.8	352.5	314.8	249.8	192.5	157.3	157	142.6	113.9	116.3	110.1	141.6	427	298.9	61.08	34.96	33.03	32.02	31.69	115
165	150.2	52.09	124.2	293.1	303.5	282	246.4	191.9	141.3	203.9	223.4	253.5	273	361.5	364	335.4	306.2	247.2	186.8	156.2	160.1	135.7	123.7	119.2	105.5	115	319	384.5	92.14	39.71	33.06	29.35	28.68	40.09
159.9	90.92	88.85	120.6	182.7	245.7	321.4	242.5	191.2	201.6	167.9	189.3	232.3	312	355.9	303.7	300.4	269.2	240.4	177.6	161.5	150.2	135	122.9	113.9	97.61	102	195.5	427.3	162.1	47.03	35.01	34.57	28.81	27.07	273.2
284.1	108.4	166.3	235.5	287.4	294.2	307.6	239.5	224.8	180.8	175.9	204.1	221.9	245.5	284.8	306.8	308.2	279.7	222.3	187.5	153.9	141.2	128.7	131.1	118.6	109	92.29	128	384.3	253.6	55.05	35.68	31.44	25.67	25.31	64.57
555.6	196.2	106.7	196.6	266.8	264.1	304.1	227	193.5	200.8	171.7	220	214.9	225.8	257.2	306.2	295.8	260.6	226.7	176.6	152.3	132.4	132.7	132	119.7	108	98.36	98.45	302.3	341.3	81.93	36.24	31.76	27.46	25.22	29.43	470.8
	160.5	136.9	191.6	187.2	323.5	268.9	220.5	179.5	188.6	182.5	195.2	216.8	248.1	234.3	280	266	256.1	200.8	181.9	155.7	134.7	135.5	126.3	118.6	103.1	102.4	85.4	203.1	381.9	135.1	41.87	30.39	30.48	23.28	26.63	91.11
	32.2	105.6	93.02	226	220.9	294.3	199	160.1	205.7	167.5	176.7	195.6	203.3	243.5	259	224.4	224.5	189.8	176.8	148.5	147.3	134.1	120.7	116	99.55	98.29	83.73	126.6	356.8	214	49.67	33.95	28.68	25.48	22.22	32.35
	41	56.62	116.6	159.1	246.4	239	202.1	159	170.3	153.8	172.5	177.3	209.4	239.8	257.7	241.3	203.2	199	169	140.3	141.3	133.2	123.1	118.9	101.3	91.77	96.16	95.62	291.6	304.7	66.93	35.68	27.77	26.47	23.13	19.49	183.3
	320.1	5.186	139	171.4	247.3	243	196.6	195.6	141.6	154.8	156	175.5	228.6	225.9	229.6	218.3	218.7	198.7	158	139.1	138.8	128.7	122.4	115.2	103.3	96.32	89.64	83.79	198.3	348.6	110.3	35.79	32.58	26.33	23.37	19.14	44.77	1779
	810.4	58.34	118.1	142.3	356.7	196.1	171.2	169	174.6	143.3	159	174.9	212.7	188.1	225.5	229.6	208.4	190.4	169.9	144.7	132.3	135.3	113.3	115.2	105.8	92.41	85.51	80.56	120.4	337.8	182.4	43.26	33.27	30.02	23.27	16.94	23	414.6
		65.64	102.8	168.7	233.1	199.9	126.2	150.4	123.1	159	182.1	150.8	178.2	203.3	193.8	187.8	192.6	160.5	160.8	135.8	133	128.5	118.5	110.6	112.5	95.17	83.33	76.86	90.95	271.3	252.5	70.58	34.44	29.16	23.94	19.17	19.46	79.13	3105
		9.784	53.93	267.1	186.1	213.4	105.9	171	142.9	164.8	149.7	174.5	163.8	182.2	192.9	180.2	173.3	182.3	160.1	132.2	139.6	119.3	120.1	110.8	102.5	98	90.99	74.16	80.33	190.5	300.8	103.9	36.83	29.98	25.01	19.58	13.77	25.56	841.9
		107.8	168.2	126.1	167.2	243.8	170.4	157	147.2	154.5	117.2	145	174.4	184.1	181.3	170.8	187.9	174.6	146.5	118.8	140.2	114.3	120.1	112.5	102.1	103.6	90.31	76.28	76.35	133.9	301.5	156.6	44.59	34.05	23	19.04	16.47	17.38	158.4
		368.8	130.8	98.41	243.8	193.6	167.4	155.2	137.8	150.3	131	145.3	180.2	185.2	192.5	173.7	169.4	170	143.5	124.2	125.9	122.8	116.1	110	103.2	101.1	90.63	87.39	71.08	93.55	259.3	226.5	56.2	31.19	25.52	19.34	17.53	15.24	35.88	1512
		1155	103	118.5	188.3	209.6	192.8	170.7	107.2	136.8	137.7	136.7	177.4	178.1	196.9	187.2	160.8	158.3	142.4	121.7	120.6	128	113.3	117.8	101.7	92.43	82	88.81	75.62	75.94	185.7	280.3	86.52	34.48	27.89	16.88	17.08	12.91	19.79	345
		1646	108.8	175.7	221.9	189	158.7	139.4	141	137.1	126.3	158.3	152.1	171.6	164.7	168.7	144.3	152.7	143.9	122	120.7	115.4	119.6	109.2	105.4	95.92	91.48	81.62	74.89	74.67	127.6	281.2	139.2	34.56	29.05	18.98	17.82	12.8	14.92	67.57	2733
		2713	137.4	95.61	187.7	214.1	142.7	149.1	152.8	132.5	138.5	127.4	150.4	146.6	174.8	166.9	163.7	133.5	136.4	120.7	120.7	114	108.7	108.4	101.8	96.74	88.51	81.66	79.16	71.22	98.09	248.6	194.5	48.53	28.38	20.7	17.02	13.04	14.21	20.18	791.9
			119.2	108.5	174.4	171.2	129.1	119.7	141	134.1	137.1	152.7	147.7	161	162.8	151.4	150.8	146.6	128	119.2	114.5	119.6	107.1	104.8	98.39	92.84	93.69	83.25	78.07	71.04	76.27	193.5	241.5	68.29	29.69	20.32	17.18	14.93	11.89	13.41	155.4	4093
			428	199.5	262.9	142.5	158.1	144.5	142.4	127.7	116.8	130.4	123.1	157.2	162.1	146.4	137.4	133.9	127.2	119	109.9	109.5	106.7	105.1	91.67	96.07	87.88	76.12	74.82	67.35	66.96	133.6	260.4	105.5	31.53	23.03	17.05	15.54	11.22	12.77	35.24	1401
			1114	177.9	210.2	188	167.2	143.3	99.92	115.1	134.7	137.7	118.2	165.1	172.9	140.7	138.2	119.4	116.3	105.7	106.8	93.94	93.21	107.1	90.83	91.86	86.72	77.7	78.19	73.75	67.47	94.39	236.6	157.1	40.34	20.37	15.55	14.56	12.81	10.89	16.38	321.6
				161.9	166.6	202.1	126.8	155.2	137.4	111.3	113.7	116.7	132.3	147.3	152.5	128	130.5	126.8	113.9	104.6	104.5	109.9	97.47	97.44	95.87	88.62	90.01	80.72	71.65	66.66	62.57	74.73	189.4	207.9	52.85	22.3	17.37	13.56	11.9	9.645	10.73	60.43	2326
				207.9	202.6	145.7	141.8	174.3	136	143.7	122.7	117.4	132.4	142.2	150.3	142.7	123.8	118.6	109.4	106.7	98.21	98.78	89.08	93.07	88.34	88.52	82.44	79.9	71.81	65.99	67.02	64.88	132	228.4	81.56	28.82	17.43	13.87	10.65	9.412	9.939	19.35	651.9
				236.4	147.1	214.8	120.5	165	149.3	124.3	128.4	145.4	128	139.9	143.2	145.7	125	123.6	108.4	114.4	107.6	106.1	94.42	99.01	98.48	92.14	81.91	83.22	68.88	72.36	69.58	57.01	92.78	217.7	119.4	30.33	18.99	13.19	11.44	9.002	9.558	13.13	124.1	3549
					133.2	149.5	160.7	128.9	129.6	126.6	126.6	138.8	127.4	132.6	156.5	142.9	119.1	113.5	96.95	98.53	101.2	108.9	93.74	94.43	82.52	90.27	75.1	73.36	66.37	63.46	65.19	62.61	68.71	191.8	165.4	43.5	17.72	12.59	14.63	11.98	8.701	8.669	29.03	1226
					159.8	146.5	163.6	90.36	135.5	120.9	118.8	136.1	121.7	140.5	137.5	133	115.3	107.6	99.92	98.34	93.01	93.56	93.92	79.73	82.97	87.04	76.47	75.48	67.61	67.02	61.02	61.3	58.21	130.9	194.4	62.5	22.03	15.11	12.03	10.08	8.178	8.615	12.01	275.8	5006
					176	128.6	112.7	141.1	145	127.1	128.4	124.3	127.5	155.9	138.6	129.7	127.4	99.17	102.4	82.69	84.2	83.64	89.78	72.03	83.51	84.42	73.81	81.04	68.21	67.34	67.22	58.34	59.89	98.52	200.3	100.4	25.49	15.21	12.28	8.562	7.75	8.955	9.164	52.58	2106	7713
					125.7	115.9	110.8	118.8	91.05	98.48	115.2	115.6	115	141.7	154.3	123.4	111.2	115.1	91.24	88.26	85.19	80.67	87.37	89.02	75.96	82.26	75.91	80.36	72.46	66.32	75.25	61.88	49.51	66.23	164.5	130.9	28.87	15.77	13.68	8.823	8.715	7.188	7.5	15.97	587.6	6227
					265.7	116.7	163.1	121.3	135.8	129.7	104.4	107.3	140	133.5	136.8	121.2	117.3	108	83.08	88.8	79.93	73.01	83.9	88.05	72.02	75.38	76.45	71.21	74.5	68.3	63.32	61.78	54.66	53.47	127.1	157.8	50.28	16.24	13.4	10.26	7.634	6.891	5.69	9.908	108.7	3305	7041
					974.3	137.9	146.7	132.9	112.2	118.5	134.2	119.5	138.5	124.7	125.2	115.6	105.4	91.46	83.13	84.32	92.57	80.89	81.33	74.9	74.23	75.3	69.95	71.19	65.87	68.2	60.75	58.86	59.53	48.37	77.1	170.5	78.11	16	11.67	10.11	7.835	8.39	5.317	6.939	22.94	1132	7081
						159.4	174.6	109	118.7	117.7	111.1	132.9	112.1	115.7	134.4	111	97.93	89	80.86	91	83.54	79.14	75.63	75.44	80.76	64.39	71.34	63.79	66.05	64.73	62.18	57.05	55.57	51.05	61.69	149.1	110.3	22.3	12.5	9.371	7.584	8.004	6.734	6.413	9.313	257.3	4694
						177.2	142.2	98.66	119	127.7	119.8	119.1	110.8	98.06	108.6	115.3	103	96.08	86.3	81.17	79.86	67.1	64.23	67.56	77.7	69.89	69.39	66.63	61.93	65.07	66.92	56.19	46.8	53.19	42.59	114.5	125.2	32.77	12.4	9.011	8.174	7.046	6.334	6.238	6.73	47.9	1985
						183.8	136.5	131.7	109.8	100.2	125.4	103	106.8	134.6	113.9	103.8	97.61	77.71	81.99	81.71	69.97	70.43	71.64	64.34	63.62	66.43	67.29	63.07	56.6	66.06	59.21	55.85	50.49	43.13	38.46	82.25	134.9	53.71	14.52	9.979	9.615	6.634	6.141	6.816	5.335	13.39	565.9
							122.3	112.8	114.6	126.6	117.6	123.5	107.3	100.6	102.1	100.5	98.16	84.59	75.11	70.03	64.45	70.97	63.49	61.25	66.18	61.81	63.18	59.95	60.45	60.87	56.44	57.31	52.42	48.36	38.16	60.55	130.5	80.93	19.3	10.83	9.045	6.513	6.987	5.323	5.392	8.665	105.8
							131.2	122	106.5	123	123.2	97.04	98.66	98.94	123.3	102.6	100.3	84.76	68.7	66.03	76.17	66.71	63.67	63.62	58.52	65.64	60.56	60.81	54.41	58.04	51.44	48.45	47.9	43.51	36.27	42.51	107.8	105.6	25.19	11.69	6.746	6.839	5.871	6.441	4.547	6.826	21.38	1045
							129.9	132.1	103.6	113.8	119.9	117.2	101.6	104.3	129.3	103.3	82.85	78.29	60.68	58.28	60.99	60.82	55.39	63	53.02	61.95	55.74	56.2	55.24	60.84	50.02	50.54	47.66	40.55	37.57	30.94	70.74	113.2	39.68	11.36	8.048	7.768	5.059	3.955	6.045	4.653	9.344	239.4	4288
							142.6	145.7	107	108.6	93.84	122.2	111.9	107.7	114.9	102.2	82.77	81.72	61.84	63.75	56.49	63.5	58.64	51.25	53.28	56.69	52.96	53.73	55.9	52	52.27	57.03	52.59	42.49	34.86	27.64	51.96	107.1	61.93	13.59	8.241	6.51	5.025	5.09	4.404	3.659	6.311	42.96	1846
							151.9	97.7	87.31	122.3	108.2	103.3	107.9	96.93	107.7	94.93	78.48	60.72	65.56	59.96	56.61	55.64	56.94	51.11	54.66	52.7	57.01	51.89	52.45	52.47	52.31	52.81	47.55	40.77	32.88	26.04	34.73	97.74	82.18	20.31	7	6.346	4.478	4.819	4.916	4.687	5.618	13.55	536.5
							375	123.7	98.32	99.6	88.87	107.8	108.8	95.19	100.5	88.33	72.61	69.01	69.56	62.22	54.86	55.05	53.96	50.34	54.88	53.82	55.54	56.42	52.93	49.73	45.31	52.91	48.36	41.71	31.94	27.3	26.24	73.14	98.98	27.88	7.552	5.616	4.515	4.479	4.727	3.729	4.338	6.52	104.2
								118.9	114	120	99.21	106	87.04	101.1	101.1	96.47	66.16	68.17	63.38	55.47	53.39	53.21	50.54	46.45	48.23	48.92	50.58	50.68	49.26	42.56	44.78	50.9	43.78	39.96	31.94	25.03	24.93	50.27	94.49	46.44	10.17	6.116	5.62	5.043	4.628	3.568	3.919	5.248	22.6
								136.3	119.5	93.48	87.04	102.6	89.92	95.29	93.14	86.05	73.78	63.4	52.29	54.68	49.13	47.22	45.72	40.56	46.38	44.7	52.52	48.03	47.32	45.09	47.23	43.97	43.75	39.11	30.88	24.05	21	29.71	90.4	63.16	14.5	6.544	5.995	4.953	3.641	2.969	3.771	5.004	8.676
								134.5	95.75	106.3	91.01	97.11	97.68	88.82	87.74	86.51	77.76	66.17	52.65	51.43	46.21	49.78	45.07	43.8	44.2	45.24	46.3	50.09	43.23	42.16	44.95	46.23	40.48	34.36	29.83	24.81	19.51	20.63	64.45	73.67	20.36	6.515	5.948	3.828	3.638	4.351	3.431	4	4.645
								160	114.5	106.9	88.97	97.32	82.37	87.13	98.57	79.53	66.94	59.48	49.06	48.87	45.69	44.41	44.32	39.01	37.68	40.68	48.07	41.82	44.7	44.11	47.34	42.21	37.14	34.42	25.67	26.73	19.75	19.06	46.45	84.21	29.98	7.33	5.432	3.838	3.848	4.276	3.906	3.506	4.984
									110.5	91.73	83.43	96.43	102	92.57	98.61	74	71.62	64.04	47.9	46.35	45.09	40.11	37.19	40.58	38.58	39.23	39.66	36.71	40.52	38.61	42.56	36.54	34.33	36.53	28.74	25.09	20.12	18.3	29.85	77.19	44.79	10.57	5.924	4.678	3.476	3.641	3.103	2.993	4.107
									77.7	87.15	98.95	72.6	80.45	79.88	93.53	73.91	72.22	59.62	46.64	40.81	40.19	40.75	36.85	36.08	35.02	40.41	41.73	37.3	38.57	41.07	39.65	36.03	35.49	36.58	28.34	24.48	18.21	16.99	19.7	64.38	60.25	15.77	4.22	4.252	4.22	3.406	3.029	3.66	2.71
									85.32	86.21	82.77	78.59	78.3	89.69	84.93	67.38	56.9	54.51	43.44	41.75	38.26	39.75	40.24	37	39.22	37.38	37.17	34.71	37.02	37.01	36.24	38.73	37.27	33	26.87	21.57	18.18	15.03	13.2	41.92	62.04	26.01	5.725	4.69	3.245	2.393	4.907	2.178	3.174
									117.5	87.54	97.98	81.78	78.53	75.13	82.12	55.35	63.32	41.93	44.91	43.06	36.53	35.74	35.79	35.81	39.25	34.5	34.14	37.52	36.69	37.64	39.29	34.02	32.44	32.51	25.77	21.05	17.68	13.57	13.66	29.27	69.1	37.25	6.406	4.386	4.85	4.446	2.803	2.426	2.806
									142	79.57	105.3	80.96	67.71	69.95	70.34	65.61	56.31	53.27	39.35	38.04	39.92	32.21	36.48	33.42	35.35	31.73	34.91	36.66	32.85	33.45	35.71	32.99	32.19	30.64	23	21.82	17.57	13.16	12.55	17.97	62.51	49.07	12.83	3.997	3.282	2.999	3.424	4.181	2.807
									391.6	79.37	80.39	78.27	81.42	64.68	65.02	68.66	48.85	44.85	35.14	32.6	33.04	38.48	28.18	28.01	30.64	30.8	34.28	31.12	29.24	30.24	32.77	36.54	30.59	28.78	22.26	21.85	17.87	12.26	11.26	12.48	44.32	58.51	16.47	4.508	3.26	3.005	3.528	3.639	3.299
										73.32	65.92	78.11	72	69.33	61.02	55	47.56	36.86	37.63	29.62	31.52	30.61	33.04	29.92	29.72	29.08	27.96	31.02	27.35	31.64	34.14	31.64	32.95	24.71	22.26	20.83	15.59	12.01	11.28	9.771	28.52	56.72	26.79	5.638	3.924	4.159	3.2	3.233	2.369
										86.06	79.23	63.93	65	65.32	63.45	56.13	61.38	40.79	32	31.85	30.98	33.32	31.5	27.24	32.15	28.85	27.9	29.81	29.18	27.88	25.8	29.18	28.31	26.77	23.03	17.58	14.25	12.53	10.78	8.764	19.33	55.55	35.08	7.917	3.565	3.406	2.565	4.258	3.781
										100.3	79.71	65.79	69.7	60.43	71.08	57.35	48.48	40.73	38	29.14	26.17	30.5	28.98	29.92	27.38	28.41	26.5	28.36	27.08	26.17	26.37	27.93	28.34	25.1	21.33	18.26	15.78	11.83	10.06	9.031	11.68	46.2	43.98	13.64	3.2	3.106	2.719	2.492	3.142
										107.7	69.3	75.07	66.28	60.23	62	60.33	43.58	38.25	31.21	23.89	26.84	25.49	23.19	23.74	28.38	29.15	25.8	26.39	26.29	28.31	27.71	26.89	24.53	22.17	21.82	16.1	13.23	11.66	9.958	7.582	7.513	30.25	49.39	20.27	5.693	2.641	3.328	2.463	3.708
										276.9	70.23	88.6	64.98	63.95	57.6	62.34	41.99	38.99	35.45	27.48	23.05	26.34	25.86	25.51	25.09	24.49	25.31	24.95	24.9	25.92	23.08	28.24	23.27	24.72	18.34	15.23	15	11.56	9.235	9.294	7.297	19.75	49.57	28.74	5.736	3.018	2.545	2.873	2.488
											73.4	83.15	73.66	63.85	65.92	58.91	45.16	36.04	33.19	23.98	23.13	25.58	22.97	26.5	23.74	22.53	23.18	26.52	22	21.87	21.81	25.2	19.86	21.24	22.66	16.63	15.9	13.04	11	9.447	8.038	10.88	40.75	37.85	10.39	2.822	3.49	2.639	2.794
											75.62	63.02	67.32	69.1	72.01	50.19	42.75	34.94	28.68	26.79	22.78	23.63	25.34	22.53	21.48	20.23	22.26	23.04	19.92	24.2	20.98	23.38	22.02	18.89	20.29	17.78	15.17	10.43	10.25	6.496	6.978	9.026	34.13	43.01	13.85	4.543	2.533	2.478	2.104
											85.6	65.99	65.32	66.66	52.25	56.35	39.38	29.61	31.5	27.69	27.6	19.71	24.31	26.41	20.89	23.19	20.51	24.48	24.85	24.04	22.58	23.3	22.96	19.54	19.56	14.99	13.39	10.49	9.671	7.939	7.473	6.516	21.42	42.35	21.11	4.849	1.97	2.374	2.076
											101.7	58.92	53.14	70.49	52.21	41.65	37.67	24.75	31.73	21.87	19.7	19.87	21.32	22.94	17.58	20.98	19.67	21.21	21.59	23.24	19.53	24.86	22.79	21.08	16.8	14.03	10.22	9.135	10.7	7.921	6.229	5.885	12.8	37.47	27.96	7.201	3.11	1.749	2.822
											281.2	74.02	64.84	70.47	54.59	45.18	45.8	27.55	21.91	23.3	21.47	18.63	19.62	20.47	18.62	19.93	19.57	18.69	18.26	21.98	18.03	18.24	19.69	20.3	17.76	14.77	11.39	8.542	9.848	6.941	7.524	5.711	7.411	30.66	33.89	11.36	3.791	2.405	2.222
												66.95	59.13	58.65	54.4	42.16	36.22	30.52	18.47	23.85	21.37	21.25	20.14	18.88	21.03	19.12	18.06	19.38	18.46	20.96	19.51	17.47	18.91	19.94	15.72	13.27	11.68	9.735	7.932	6.511	5.879	5.878	5.91	20.85	36.43	17.27	5.015	3.03	1.76
												65.96	62.42	58.34	47.4	47.38	37.57	28.49	18.25	22.83	17.95	17.02	19.28	16.5	18.48	19.3	16.55	19.47	17.31	19.3	18.4	20.87	17.1	17.09	12.38	13.55	9.338	9.377	8.349	6.401	5.564	5.21	5.449	12.41	34.08	21.55	5.821	2.967	2.587
												76.13	60.48	52.86	50.62	43.69	32.19	29.24	22.64	25.03	19.22	17.05	19.19	14.72	16.35	15.49	18.28	16.26	17.75	16.22	18.66	21.3	18.23	16.55	14.14	12.47	9.951	9.753	7.036	6.604	5.085	5.59	5.688	8.723	30.93	25.04	9.182	3.283	2.348
												77.7	58.7	42.92	53.28	42.15	38.81	25	24.27	20.19	16.74	16.07	16.61	15.6	16.89	16.12	17.66	16.81	18.5	16.26	17.18	13.28	15.75	17.09	12.51	13.03	9.065	9.252	6.517	5.828	5.287	5.885	3.894	5.539	23.4	32.64	12.2	4.43	2.415
												239.8	49.66	50.35	58.25	52.27	30.79	23.35	24.39	17.97	15.4	17.16	14.47	15.58	16.1	13.93	13.58	15.66	15.86	14.13	19.17	14.12	16.62	14.55	15.45	11.19	9.139	7.418	7.305	6.107	4.345	7.139	4.448	7.15	14.39	32.22	18.08	3.786	2.534
													51.23	52.37	41.81	37.31	30.39	27.88	18.75	20.36	16.41	14.45	14.31	15.38	16.04	12.61	15.84	13.69	13.79	15.35	17.88	14.21	13.79	16.08	13.32	9.345	8.253	8.509	7.494	6.282	4.5	4.662	4.374	4.155	9.579	29.57	21.88	7.572	3.758
													68.61	56.05	42.34	35.44	33.67	25.34	16.19	15.31	15.25	14.82	11.48	17.83	15.37	13.09	17.52	13.76	11.57	14.66	14.78	15.78	13.87	13.75	14.13	8.783	10.28	8.704	6.28	8.142	4.069	4.185	5.014	3.866	5.851	23.06	26.54	10.54	2.747
													62.32	47.27	45.61	32.61	27.49	19.43	18.29	18.13	12.66	13.08	13.95	14.59	16.12	13.21	12.94	11.47	12.11	14.3	11.59	11.76	14.04	13.43	11.22	10.26	8.674	8.023	6.668	7.359	4.796	4.876	4.592	4.751	4.634	15.93	30.82	15.94	3.527
													79.42	46.3	41.5	37.75	27.08	20.46	15.37	19.89	10.06	16.35	11.4	14.2	14.02	8.697	11.48	11.49	13.21	13.19	13.65	13.69	12.74	11	12.45	7.989	10.21	6.495	7.693	6.003	5.707	4.652	4.278	5.704	3.439	9.33	25.69	20.74	4.73
													150.1	59.3	43.08	34.18	26.5	24.11	14.57	12.89	14.55	15.17	10.56	11.25	12	11.82	8.142	11.45	9.654	13.86	13.4	10.07	12.51	11.13	10.18	8.103	7.864	8.417	6.587	5.242	6.293	5.152	5.37	4.838	3.682	8.255	21	24.59	7.238
													666.5	52.85	48.25	33.83	27.06	19.7	15.55	12.01	11.99	11.71	12.32	12.15	10.67	12.81	11.05	11.05	11.71	12.88	12.57	11.31	10.29	11.3	9.708	7.457	7.278	6.436	4.664	5.438	6.228	4.012	3.823	3.297	3.583	4.741	15.55	26.68	10.79
														60.38	39.66	35.24	24.65	21.79	16.23	11.61	12.28	9.18	9.897	12.83	13.44	11.31	10.35	10.14	11.84	11.89	11.45	11.27	11.11	10.02	10.51	8.33	7.466	7.002	4.956	4.575	5.513	4.499	3.262	3.631	3.786	3.976	10.71	25.16	14.87
														50.24	49.04	29.09	20.85	20.85	16.9	10.52	13.26	8.95	10.99	12.11	11.35	11.22	10.3	8.433	10.74	9.275	10.54	9.979	11.23	10.64	9.263	7.215	7.19	6.856	4.626	3.841	4.86	4.402	3.396	4.197	3.348	3.488	6.406	20.82	18.02
														58.2	47.84	34.78	20.43	20.76	18.11	13.71	12.84	12.84	12.6	9.352	10.8	11.45	10.19	8.767	8.89	10.82	10.43	11.65	11.07	7.746	8.314	7.318	6.43	5.245	4.676	3.591	3.845	2.814	5.29	3.66	3.596	2.927	5.103	18.05	19.47
														143.5	41.9	37.94	24.14	15.08	15.27	11.83	12.75	8.855	10.62	7.941	10.02	9.262	10.15	8.936	9.91	8.069	8.312	8.35	9.193	9.428	6.907	7.164	5.497	5.234	4.708	4.326	3.586	3.498	5.415	2.585	1.987	3.069	3.96	12.34	22.37
														593.6	42.24	38.67	28.32	17.87	14.31	13.81	8.722	10.3	9.067	7.607	8.296	9.052	8.694	10.8	10.14	9.007	8.627	10.13	7.644	7.875	6.12	6.272	6.772	5.842	4.461	4.798	3.537	5.005	4.307	2.841	2.27	3.191	3.339	7.866	20.31
														1788	37.43	27.29	25.99	15.33	9.339	11.03	10.86	7.263	8.121	9.141	8.233	9.864	7.777	10.46	9.116	9.038	10.24	8.614	8.383	7.425	6.687	7.159	6.909	5.48	3.373	4.01	3.634	4.578	4.728	2.772	3.517	2.459	3.71	6.091	15.98
															41.64	30.18	22.78	15.37	16.35	10.44	12.41	11.18	8.97	9.485	8.503	7.436	8.745	7.578	8.342	6.691	9.326	7.556	9.684	5.984	6.719	5.529	5.236	5.042	4.046	4.293	3.458	3.349	3.113	2.321	2.812	2.497	3.639	3.788	12.58
															59.63	30.44	22.12	14.27	11.9	8.415	8.201	7.888	10.86	8.013	8.518	9.176	9.636	9.006	7.171	8.007	8.962	9.619	7.801	5.965	6.071	5.715	5.31	5.434	5.197	3.42	3.468	3.394	4.02	3.038	2.29	2.251	3.256	3.617	9.008
															103.4	31	21.12	12.14	11.09	10.7	11.26	6.111	6.075	8.15	6.332	7.668	7.141	8.103	6.592	8.679	7.662	9.018	8.665	7.144	6.203	5.022	6.12	4.663	4.218	4.288	2.783	2.363	3.322	3.476	3.403	1.812	3.018	2.817	5.074
															466.6	33.43	17.77	13.74	16.04	10.2	11.32	7.659	6.617	6.834	6.813	7.089	7.131	7.078	7.678	7.453	7.819	6.595	7.637	6.163	6.212	5.203	4.817	3.951	4.878	3.737	3.164	2.734	3.616	2.724	2.552	2.437	3.432	2.652	3.156
															1354	24.43	19.73	16.58	15.39	11.57	11.41	5.82	7.408	8.304	6.907	6.866	7.265	7.738	6.904	5.532	9.394	7.635	7.236	5.738	5.862	5.255	6.022	4.16	4.573	3.759	3.492	2.706	2.963	2.742	2.597	2.189	2.684	2.746	2.971
															3070	33.03	26.23	16.66	14.45	14.71	10.69	7.507	6.365	8.68	7.435	6.265	6.516	6.652	6.658	6.997	6.876	7.882	5.667	7.435	6.723	6.609	6.102	4.226	3.356	3.432	2.399	2.499	2.753	2	2.747	2.336	2.049	2.544	2.72
																39.3	28.83	16.51	12.85	11.15	9.95	6.456	6.385	8.083	6.873	6.345	6.631	5.85	6.051	5.866	6.806	6.544	5.147	5.989	5.294	4.356	4.251	4.147	3.896	3.277	2.846	2.732	2.309	2.98	3.277	1.945	2.295	2.013	2.056
																73.83	27.56	12.62	13.04	12.35	9.981	6.396	7.029	6.938	7.817	3.312	6.838	5.085	6.766	4.885	4.943	5.306	5.307	3.644	5.574	4.228	3.288	3.749	3.787	2.075	2.565	3.602	2.559	2.488	3.001	1.865	1.495	2.045	1.971
																	21.12	16.81	12.27	10.76	7.301	7.213	5.865	5.117	6.98	6.269	6.25	3.917	5.567	5.095	6.713	4.888	5.295	3.987	3.797	4.217	3.95	3.523	3.185	2.373	2.515	3.058	2.789	2.812	2.032	2.621	1.906	2.413	1.999
																	23.83	18.69	10.37	11.6	6.84	5.435	6.556	5.761	5.036	5.804	6.214	5.358	7.291	5.239	5.061	5.869	4.868	4.532	4.742	3.329	3.025	2.915	2.964	2.442	1.928	2.818	3.049	2.317	1.714	1.959	2.356	1.685	2.577
																	28	14.7	12.02	7.748	6.827	5.756	4.5	5.299	4.927	5.212	4.817	4.445	6.544	5.652	3.961	4.559	4.64	5.006	4.673	3.13	3.541	3.38	3.529	2.769	3.204	2.128	2.109	2.289	1.945	1.928	2.271	2.17	1.63
																		17.07	12.92	11.54	9.443	6.441	7.554	6.39	3.221	7.591	5.105	5.201	4.613	5.124	5.053	4.042	3.212	5.913	5.091	3.927	3.87	2.479	2.96	2.24	2.456	3.11	3.154	2.131	2.65	1.785	1.424	2.295	1.7
																		17.77	11.95	10.74	7.892	7.336	6.079	6.399	5.399	6.206	6.027	4.359	4.819	5.878	3.75	4.992	3.805	4.015	2.955	3.095	2.031	3.283	3.176	2.616	2.523	2.733	2.608	1.881	1.333	1.803	1.188	2.295	1.318
																		14.11	10.37	9.052	6.848	8.971	5.826	6.904	4.985	3.852	4.082	6.844	3.765	5.581	4.272	5.35	2.21	5.361	2.469	2.694	2.81	2.872	2.414	2.387	3.31	3.206	1.418	2.48	1.683	1.669	1.626	1.625	1.345
																		15.16	9.073	12.14	7.408	6.812	6.124	4.539	3.753	4.868	5.029	4.589	2.893	3.641	3.615	4.778	2.869	3.847	2.967	3.333	2.949	3.032	3.398	1.742	2.469	2.367	2.138	1.783	1.368	1.583	1.373	0.961	1.623
																		16.58	11.67	9.607	7.228	7.84	4.792	4.469	4.992	4.358	5.302	3.643	4.797	3.792	2.356	4.826	3.23	3.083	3.368	3.074	2.749	3.431	1.778	2.611	2.228	2.044	2.499	1.807	1.257	2.295	1.151	1.686	1.549
																		23.22	10.41	10.07	6.276	5.705	6.281	4.958	4.558	5.82	5.05	2.819	4.917	3.667	5.666	3.152	4.03	2.536	3.272	2.743	1.858	1.936	1.534	2.872	1.395	2.393	1.18	1.67	1.862	1.612	1.025	0.959	2.244
																		54.95	8.556	10.03	6.768	5.393	4.016	4.803	3.752	3.625	3.692	2.877	4.385	3.645	4.266	4.275	3.051	2.665	3.166	2.193	1.758	2.197	1.897	2.457	1.54	1.619	2.511	0.801	1.522	1.42	1.487	1.912	1.427
																		166.9	12.28	9.883	7.076	6.107	6.638	5.838	3.225	4.57	2.633	3.975	3.351	3.682	3.681	3.195	2.911	2.563	3.447	1.765	2.209	1.834	1.693	2.172	1.982	1.682	1.899	1.339	1.616	1.359	1.986	1.271	1.54
																		454.8	10.73	9.411	7.621	7.135	6.258	4.155	3.42	2.483	2.582	3.308	2.619	4.337	2.978	2.823	4.157	2.715	2.494	1.925	2.178	2.024	1.339	1.68	1.348	1.437	1.52	1.638	1.399	1.532	1.247	1.162	1.151
																			13.48	11.77	6.685	5.429	4.827	4.098	3.135	4.011	3.467	3.268	3.386	4.072	2.65	4.297	3.722	4.014	3.938	3.033	2.541	1.223	1.415	1.183	0.871	1.97	1.942	1.411	0.93	1.458	1.374	1.51	1.287
																			16.2	10.46	6.318	5.551	4.061	4.822	4.559	3.323	4.02	4.541	3.071	3.453	1.775	2.9	1.644	2.634	2.597	2.704	2.181	1.314	1.678	1.617	1.829	1.285	1.562	0.623	1.26	1.603	1.649	1.277	0.895
																			36.81	9.9	8.968	4.48	6.645	5.206	5.49	2.804	3.718	2.877	3.225	3.961	2.369	3.115	2.782	2.826	2.022	2.652	2.083	1.314	1.136	2.137	1.796	1.397	1.155	1.118	1.387	1.109	1.295	0.863	1.816
																			140.6	8.804	6.528	5.61	6.521	4.973	4.99	3.533	4.149	4.385	2.832	2.358	1.792	3.339	3.371	3.217	1.999	2.355	2.526	1.307	1.519	1.397	1.501	1.352	1.319	1.494	1.656	0.602	1.368	0.916	0.981
																			368.8	7.214	8.26	6.401	4.911	3.73	4.686	2.905	3.643	3.565	2.86	2.486	2.261	2.133	3.07	2.34	2.171	1.497	1.503	1.852	1.936	1.224	1.428	1.238	1.267	1.383	1.08	1.188	0.936	0.858	0.767
																			798.5	11.41	6.293	5.637	7.015	4.186	4.036	5.005	3.351	3.131	3.722	2.552	2.506	3.452	3.251	3.177	3.72	2.06	2.51	1.717	1.959	1.384	0.695	1.179	0.864	0.823	0.623	0.955	1.23	0.92	0.849
																			1473	10.09	8.023	7.237	3.64	5.675	3.671	3.626	3.965	3.196	3.399	2.396	1.544	1.872	1.966	2.306	2.58	2.904	2.428	2.077	1.683	0.968	1.612	1.685	0.921	0.694	1.696	1.08	1.381	1.084	1.56
																				30.89	7.439	6.575	3.358	5.219	3.735	3.224	4.612	2.842	2.778	2.873	2.431	2.183	3.493	1.827	2.108	2.264	1.84	1.754	1.936	0.923	1.687	1.6	1.087	1.46	1.501	0.893	0.935	1.296	0.998
																				113.1	5.046	4.866	4.663	4.837	4.131	3.597	3.178	2.621	2.19	3.96	2.588	2.526	3.196	2.38	1.873	2.246	1.535	1.651	1.365	1.034	0.906	1.154	0.987	1.207	0.824	0.773	1.265	0.674	1.07
																				278.4	8.61	3.967	3.192	3.564	3.867	4.031	2.302	1.934	2.579	2.664	2.357	1.546	2.721	2.061	1.477	2.164	1.669	1.639	2.02	1.614	0.885	1.019	0.453	0.875	1.206	0.889	0.953	0.663	1.437
																				645.3	7.583	5.209	3.783	5.38	4.416	2.424	3.922	2.984	3.811	3.227	2.033	2.883	2.938	1.594	3.309	2.376	2.289	1.675	2.17	0.902	1.249	0.937	0.607	0.813	0.468	1.019	0.927	0.967	1.566
																					10.86	8.125	4.949	3.312	3.782	1.512	2.901	3.814	2.33	2.103	2.298	1.427	1.044	1.959	3.363	1.593	1.649	1.194	1.247	1.285	0.987	1.111	1.092	0.899	1.02	0.667	0.997	1.405	1.236
																					23.51	4.402	4.831	3.757	2.135	4.679	3.851	2.932	2.375	2.514	1.955	1.758	0.745	1.509	1.814	1.11	0.961	1.385	1.768	1.451	1.194	1.248	1.288	0.541	1.228	0.714	0.945	0.851	0.823
																					83.73	4.496	5.344	4.246	3.472	3.822	3.469	3.177	2.17	3.32	1.963	1.384	1.784	2.097	1.729	1.113	1.778	0.901	1.702	1.62	1.262	1.238	1.064	0.58	1.246	0.898	1.053	0.666	0.414
																					207.8	7.395	6.344	3.436	4.258	4.013	2.96	3.904	2.371	1.577	1.828	2.277	1.216	2.042	2.52	1.887	1.028	0.986	2.102	1.116	0.881	0.733	0.779	0.757	0.728	0.473	1.194	0.818	1.048
[truncated: 1 more columns]
