# Supplementary material for: Utilization and transformation of Chrysotila dentata-derived dissolved organic matter by phycosphere bacteria Marinobacter hydrocarbonoclasticus and Bacillus firmus
Source: PeerJ. 2024 Jan 4;12:e16552. doi: 10.7717/peerj.16552 (PMC10771764; doi:10.7717/peerj.16552)
Supplement: Supplemental Information 9 [file peerj-12-16552-s009.xlsx]

## Sheet: Sheet1
46.45	195.7	76.45	161.7
89.6	72.92	69.14	218.4
18.37	92.19	139.6	381	279.3
84.66	58.64	32.41	340	315.9
112.5	31.18	118.3	251.6	639	405.7
80.34	76.49	139.1	268.9	757	348.3
117.8	99.72	84.14	140.1	670.1	544.2	760.5
44.58	109.4	164.7	126.7	466.2	591.3	328.4
86.9	126.4	113.5	69.73	371	807.2	397.8
120	120.2	172.6	142.9	160.6	677	495.5
75.68	158.6	123.1	222.9	126.6	475	854.8	312
23.7	69.34	152.1	183.8	127.6	296.6	1081	448.4
134.9	77.76	206.3	159.6	112.2	163.1	834.7	647.1	301.2
150.7	50.49	71.25	310.1	144.6	125.6	419.5	873.1	273.2
123	132.2	102.4	228.5	155.9	132.8	272	958.7	429.8
182.2	121.4	102.2	105.3	128.1	149	178.7	741.3	825.7	260.2
321.5	124.9	139.9	142.8	153	125.7	97.1	522.1	1047	320.6
166.1	31.11	200	62.17	162.2	110	69.63	221.6	1031	487.5	305.6
197.3	75.05	127.4	229.2	141.1	123.1	93.59	107	844.2	931.6	204.6
169.9	224.8	139.5	194.4	178.3	111.2	97.04	87	484.6	1208	336.1	574.3
131.2	249.5	187.2	155.6	176.4	125.7	87.2	91.85	246.1	1283	640.3	228.4
132	268	195	190.3	253.7	138	95.35	88.44	118.2	943.1	983	223
134.9	285.5	180.5	167.1	223.2	106.8	107.9	95.29	83.59	516.4	1320	371.3	338.7
217.4	155.6	219.6	321.4	271.3	184.8	131.2	70.45	65.28	276.3	1364	680.9	208
141.4	145.8	220.8	384.2	344	312.9	93.31	77.32	62.53	144.7	1087	1145	237.7
234.8	248.7	230.8	379.8	279.6	328.7	143.8	74.8	71.16	102.3	600.5	1443	370.8	289.6
224.1	145.2	242	337.5	499.6	334.9	163.8	76.88	67.99	79.22	284	1428	813.4	209.5
210.1	144.8	260.4	341.5	508	428.6	251.9	64.77	78.62	80.11	135.9	1157	1259	282.5	470
224.9	127.4	210.1	307.7	582.7	561.6	231	96.8	79.55	102.6	120.2	638.8	1637	472	334.3
173.9	121.6	209.1	480.8	743.9	508.2	237.4	181.6	109.5	91.07	98.63	349.6	1658	872.1	304.2	812.2
100.3	208.3	290.4	460.7	606.7	535.3	278.5	140.7	114	103.6	123.9	206.7	1278	1393	373.3	415.5
314.8	245.2	155.2	532.1	678	534.2	309.4	188.5	129.2	114.9	132.9	185.9	738.3	1926	615.7	348.3
173	222.9	280	504.4	866.5	782.7	410.8	184.3	147.9	117.4	170.3	216.2	434.8	1943	973	401.6	543.6
301.6	238.3	286.4	585.9	759.3	667	465.8	227.9	163.4	146.2	190.3	186.8	328.9	1468	1577	427.9	395.2
221.1	285.6	275.5	513.9	750.6	764.8	532.3	258.9	177.6	139.6	198.8	225.8	289.9	947.7	2048	587.3	389.2
251.8	182	145.3	371.4	725.7	857	521.4	270.2	167	197.2	195.9	213.8	283.3	578.1	2069	1026	378.1
94.71	140.2	209	305.7	742.4	794.1	588.3	300.2	161.8	178.7	225.8	248.3	299.3	424.4	1660	1648	435.9	301.3
219.9	201.5	175.2	463.6	870.1	807.4	549.8	296.5	174.3	195	215.2	273.9	327.5	400.1	1140	2151	610	299	390.2
275.1	227.8	246.4	517	775.8	708	497.6	312.3	190.2	224.3	233.8	319.9	343.5	413	746.4	2132	970.8	300.7	259.7
143.7	229.1	223.9	564.4	924	765	611.3	362.3	240.9	261	293.6	344.4	356.8	447	619.3	1718	1528	367.6	238.4
157.1	182	183.9	325.4	833.1	734.3	510.6	349.9	270.4	236.1	327.5	339.2	417.1	430.3	572.7	1238	2057	545.2	236	199.1
135.1	190.5	208.4	458.9	800.9	819.6	556.5	339.5	275.1	272.3	352.9	370.5	475.4	517.3	599.9	900.7	2015	905.3	265.4	183.3
240.3	135.5	202.4	546.4	670.3	761.5	640.3	409	298.4	330.5	375.9	433.8	532.5	574.6	617.3	745.5	1712	1377	293.8	172.3	208.7
160.4	188.8	174.5	439.1	1018	922.2	644.6	373.5	324.5	319.4	393.6	502.7	586.9	703.7	682.9	731.2	1225	1799	434.2	169.9	144.4
191.4	229.7	266	620.4	1079	1039	612.5	423.3	334.8	370.6	444.8	535.1	654.2	727.6	757.6	775.1	944.6	1944	719.1	195.1	134.5	317.5
168.7	217.4	274.9	715	1058	959	681.8	493.3	391.6	361.8	463.3	583.1	734.8	870.6	821	803.7	797.1	1662	1169	226.1	129.5	143.2
153.4	138.8	310	640	1372	1139	796.5	454.1	361.4	398	474.6	670.5	749	881.1	921.1	894.3	730.5	1219	1590	356.8	136.4	120.4	602.8
114	174.5	235.7	764.6	1585	1115	747	437.2	355.9	428	542.6	673.9	786.3	915.1	957.9	963.5	810.4	869.3	1664	603.2	139.8	109.8	177.2
193.1	208.2	288.3	996.5	1473	1204	811.5	546.9	416.4	413.4	518.8	691.9	819.5	961.9	1009	911.6	763.9	737.6	1416	920.6	178.8	115.3	108.5	1134
156.8	338.9	222.4	694.9	1577	1215	775.7	531.9	464	390.7	526.6	689.7	832.3	951.7	1028	972.4	759	641.7	1017	1212	277.8	120.4	96.3	245.7
215.2	90.26	144.6	804.1	1698	1129	802.5	487.5	414.3	442	539.5	692.8	854.8	977.5	1019	976.7	783.8	640.7	715.1	1303	451.7	125.2	90.35	98.33
178	212.3	208.1	773.3	1518	1129	779.2	548	412.6	467.6	570.8	751	838.4	1014	1018	977.8	822.5	681.3	537.1	1134	774	139.8	96.27	87.1	435
177.8	213	288.1	807.3	1579	1089	740.2	563.8	472.2	499.1	605.7	694.5	866.5	1008	1038	961.9	864.1	657.6	492.8	833.4	1026	220	95.74	82.46	128.1
161.8	140.8	223.2	762.4	1445	1127	674.3	499.6	499.5	538.2	606.3	743.5	887.8	1040	1060	975.9	860.3	673.8	490.6	556.4	1097	369.1	102.3	90.6	90.33	843.1
103.4	109.6	170.3	788.2	1421	1234	642.1	478.6	410.2	451.9	573.2	762.6	881.9	1025	999.9	990.1	849.4	687.9	493.9	397.6	996.6	639	133.8	102.6	91.37	195.9
154.6	250.7	250.6	749.1	1421	1107	658.3	550.9	397.5	475.8	614.6	700	804.4	991	1005	984.3	793.9	656.9	510.7	341.5	733.8	879.3	196.5	110.2	96.11	108
162.8	169.2	164.4	713.1	1197	1022	806.4	481.6	415.5	461.8	487.3	691.3	810.2	1012	946.6	984.7	787.1	643.4	506.7	352.2	483.7	962.6	346.6	124.4	112.8	91.61
181.3	168.2	165.2	485.1	1185	959.6	705.7	472.3	441.9	449	515.5	619.7	849.7	929.8	929	932.9	790.2	686.2	495.6	349.7	332.3	902.4	551.2	156.2	115	96.41	123.7
169.2	62.55	132.4	447	991.7	912.3	757.8	466.6	402.1	458.6	518.5	649.4	790.6	856.8	910	870.7	794.4	687.7	504.2	340	300.1	679.6	805.2	212	125.8	114.4	97.5
114.5	145.4	284.1	570.6	1001	902.3	688.3	450.2	394.3	418.4	520.5	639.4	792.8	873.6	933.6	884.8	779.1	665.6	521.7	351.5	275.1	465.8	910.9	324.5	135	119.3	93.52	145.8
116.1	61.69	202.6	588.3	1019	1001	701	469.6	428	455.9	503.4	637.4	686.6	846.1	871.5	874.6	732.7	663.3	506.3	335.1	265.5	327.8	847.3	530	156.7	126.3	104.5	86.63
65.4	212	227.2	516.1	991.6	812.5	606.4	463	405.9	423.5	530.4	566.9	716.9	799.2	862.7	845.8	749.5	607.8	477.7	359.6	267.5	280.1	672	740.9	210.7	131.9	109	81.5	207.8
142.5	135.8	241.5	442.1	874.6	816.1	592.4	502.4	457.1	440.7	482.7	532.6	690.3	764.9	829.7	775.6	665.7	620	487.1	374	298.2	267.8	479.1	853.1	309.3	146.9	128.2	84.13	87.92	1757
73.21	113.6	113.5	401.5	791.7	984.9	627.3	423.1	368.6	386.4	429.6	518.3	625.4	702	758.8	737.9	692	633.8	465.8	376.2	305.9	268	361.4	824.1	490.1	178.7	135.8	98.54	69.58	354.6
231.9	106.6	122.8	479	744.7	813.9	498.4	513.5	402.9	391.2	407.5	484.8	618	763.4	757.9	748.3	669.1	614.4	486.1	372.9	314.6	264	302.5	673.2	661.6	223.8	130.2	101.5	73.48	105.1
193	131.9	195.7	388.6	864.9	636.6	578	465.4	386.4	424.4	434.3	492.6	571.5	701	761.2	749.2	662.2	564	471	372.4	321.5	289.5	272.5	501	785.9	307.4	156.3	111.4	81.63	66.85	777.4
109.6	67.77	181.7	463.7	661.3	713	566.3	500.5	351.2	372.2	425.2	509.2	569.2	637.8	717.2	671.7	659.9	557.7	479.1	392.7	308.2	302.8	282.9	360.6	769.7	446.6	164.5	109.9	84.46	55.98	171.4
103.3	187.1	181	352.7	627.3	731.9	503.9	446.3	341.3	397.6	396.3	476.8	540.8	593	688	656.9	638.8	532.7	485	381.3	294	301.8	288.7	308.4	668.3	611.3	190.5	127.2	87.19	59.15	74.15	1693
114.5	153.6	189.5	407	613.7	635.9	535.8	441.3	385	331.4	416.5	431.1	533.2	573.6	656.1	631.2	615.8	550.3	466	373.3	307	309.1	293.7	293.8	492.8	730.6	268.7	131.2	86.96	69.2	53.21	343.5
83.5	146.3	116.9	271.3	569.7	557	535.4	396.1	390.9	371.8	407.4	459.2	513.1	605.5	613	642.3	592.1	531.6	436.4	388.5	334.9	316.5	308.7	304.1	377.4	718.7	370.9	152.7	93.68	73.67	53.2	93.76
112.8	123	188.4	323.2	553.4	630.6	565	423.3	383.1	380.2	404.9	460.4	502	597	585.9	573.8	579.7	535.8	441.1	371.3	335	310.6	324	290.1	306.2	635.1	515.7	181.5	97.77	76.05	59.71	57.18	743.7
105.2	139.5	185.2	193.7	525	592.2	513.7	438	417.4	357.9	384	511.1	510.8	550.8	589.3	619.9	573.1	497.8	451.8	382.4	336.9	305.2	308.2	307.2	290.7	494.1	652.7	241.6	112.8	79.4	57.26	57.17	165.2
69.36	74.34	166.9	308.2	569.5	611.3	491	402.4	374.7	408.8	411.7	463.4	482.9	512.4	563.7	601.1	546.3	456	441.4	379	345.3	325.7	311.1	308.8	287.5	371.7	651.8	331.6	134.3	89.69	68.24	60.28	66.39
159.8	101.3	176.5	299.5	433.3	635.1	501.2	433.5	417.4	345.8	376.7	430.5	476.6	481	533.9	536.2	515.2	485.7	436.1	388.9	329	315.8	319.3	316.8	290.3	297.9	579.4	458.5	145	91.63	72.58	61.35	54.25	333.1
78.08	138.9	217.4	307.3	574.4	632.9	543.6	404.2	379.7	349	367.2	417.3	439	455.5	548.2	521.7	491.5	467	419.1	360.4	333.6	347.2	310.7	307.2	296.5	268.4	455.1	566.4	198.9	99.45	78.4	65.29	53.06	83.43
156.8	94.39	160	332.4	454	603.4	452.1	418.6	372.7	368.6	345.1	436.4	469.7	488.3	522.9	520.3	492.3	457.8	397.9	372.6	325.3	327.4	328.9	324.1	297.7	281	349.1	588.6	274.9	111.1	82.05	62.35	49.78	49.78
93.45	63.07	78	264.3	574.3	487.3	492.7	393.5	348.6	349.7	358.9	389.9	460.9	467.9	472.2	508.5	484.9	458.4	408.1	376.6	332.1	314.9	330.2	313.2	298.2	273.8	289.6	541.3	393	127.6	88.76	71.75	63.25	42.12	152
162	73.72	184.9	205.3	487.8	462.5	510.3	435.8	325.5	357.4	373.1	351	408.8	446.7	478.9	478.6	456.7	420.5	404.3	364.1	329.9	323.2	321.9	318.7	292.3	276.1	249.6	430.1	493.6	170.1	96.7	77.28	65.37	50.5	66.82	1433
261.7	118.2	144	274.3	415.9	551.9	443.6	383.3	344.6	360.2	339.6	426.6	417.7	444.7	460.9	516	433.4	441.2	389	344.3	322.3	326.4	317.1	321.2	301.9	283	255.5	318.9	542.7	244.3	116	84.48	68.78	54.18	51.87	289.3
360.4	63.56	146.1	158.7	575.6	578.9	448.6	404.4	373.6	368.2	342.9	336.3	391.7	463.5	440.4	442.5	451.1	441.1	380.9	351.4	337	321.7	322.4	314.3	294	273.7	264	265.6	497.3	343.4	121.6	95.87	80.83	63.2	50.3	81.93
757.4	97.51	148.7	273.4	481.3	527.6	407.9	366.3	362.1	335.6	366	356.3	413.4	439.5	418.3	450.8	445.5	404.7	398.5	358	329.6	315.2	322.9	309.5	300.6	275.6	250.8	244.4	411.9	412.2	151.6	101.6	85.67	70.71	52.76	47.98	629.4
1425	39.42	112.6	199.5	386.2	601.4	474.1	422	326.7	344	349.4	390.3	380.4	394	421.4	426.8	432.4	408.5	362.2	324.9	334.6	326.3	311.3	304.9	300.1	280.2	249.9	221.8	313.5	488	208.1	106.7	93.4	74.95	60.24	50.52	131.7
2138	130	57.45	219	434.5	596.8	445.1	347	335.2	370.2	361.8	364.3	367.1	392.4	401.8	409.9	433.4	396.9	367.9	335.6	324.8	314.9	303.6	306.8	290.5	282.7	255.4	223.2	248.7	446.8	296.4	126.3	94.63	82.55	65.61	47.49	53.64
3251	178.5	97.22	269.5	423.9	509.7	382.9	345.7	377.2	319.2	342.1	341.1	378	389.5	385.5	409.6	394	396.8	367.1	347.5	311.7	306.4	303.8	306.9	284.2	270.2	260.8	224.2	222.3	377.2	366.6	147.7	105.5	87.72	73.04	53.07	44.04
3721	358	88.13	269.7	413	469.6	465.6	410.1	393.1	321.6	330.4	335.6	405.6	368.3	379.9	425.6	386.8	379.3	387.2	330.8	324.6	300.3	309.6	301.4	276.6	270.7	239.9	231.7	200.1	303.4	431.5	203.3	121.1	95.56	76.73	58.54	47.06	69.47
	830.6	215	211.5	341.8	387.8	433.7	361.8	359.3	333.6	353.5	328.2	361.9	344.8	398.3	391.4	362.5	358.8	356.2	331.8	313.7	307.1	306.6	297.2	290	272.9	254	227.1	204.1	241	444	270.9	127.7	96.47	85.08	71.07	48.63	44.44	547.5
	1574	70.4	165.9	402.9	477.6	452.8	357.5	328.7	317.2	338.2	336	364.2	359.1	393.9	372.7	363.3	352.8	364.3	347.7	300.7	291.9	305.7	281.7	287.6	282.9	254.2	231.5	213.5	204.5	373.7	354.6	156.1	108.5	84.74	68.11	50.64	36.6	112.3
	2792	95.36	372.3	468.2	382.9	420.8	393.3	333.9	320.2	331.7	322.4	332.6	355.9	363.7	384.6	382.1	356.7	350.8	328.5	296.6	279.2	283.9	275.3	282.5	264.9	250.4	231.2	207.4	192.8	293.1	396.5	188.1	117.4	87.16	73.36	54.8	34.13	41.86
		82.07	223.4	332	513.3	457.8	323.9	303.3	373.9	337.1	327.4	340.6	364.4	364.1	369.3	367.3	346.5	311.1	318.3	293.3	299.4	287.2	277.9	277.8	271.4	245.1	233.5	207.3	194.9	238.6	403.7	245.9	118.8	98.24	73.61	61.14	37.64	33	228.4
		548.5	150.8	378.4	437.3	427.3	359.4	316.2	324.5	349.2	277.4	342	326.8	370.5	363.6	367.3	364.8	310.1	299.9	293.1	278.8	270.8	274.4	266.2	262.8	251.2	230.9	212.8	194	210.4	361	304.8	141.9	101.2	80.03	59.52	42.8	29.98	59.45
		1356	233.7	373.4	404.9	478.9	374.4	319.9	321.1	310.4	296.8	349	366.2	353.7	375.1	355.7	348	314.2	304.4	273.2	274.9	261	263.5	266.9	260.6	242.5	240.3	210.1	199	198.7	296.8	354.6	172.4	102.2	83.78	60.89	44.54	29.6	34.07
		1808	278.8	403.6	367.2	341.2	342.8	332.6	325.5	311.4	343	339	354.8	354.2	346.8	363.7	343.9	320.5	307.9	254.7	271.5	262.6	257.6	265.7	253.9	241.1	222	209.6	194.7	189.5	236.4	384.5	220.4	110.4	85.83	65.11	49.39	35.36	28.62
		3148	234.8	409.9	362.8	426.7	345.4	357.4	341.6	332.1	345.7	290.2	343.7	339	350.6	348	317.4	326.6	286.9	273	262.6	251.9	256.8	251.1	240	237	220.6	210.3	202.5	193.6	205	347.9	286.9	136.6	92.25	69.17	49.53	35.66	26.18	34.24
			261.5	412.9	419.1	299.2	321	334.8	335.7	329	325.5	325.2	324.5	368.7	356.2	357.8	341.6	313	296.8	272.2	253.2	245.5	252.9	250.8	246.2	224.6	226.4	211.4	205.1	188.3	184.2	292.7	321	156.1	96.94	71.37	49.91	40.02	25.31	27.24	199.6
			346.2	317.3	499.7	438	368.4	366.6	306.8	335.3	325.5	280.1	336.1	301.6	350.3	324.9	326	309.6	274.7	248.8	263.1	239.3	242.2	239.6	239.4	237.7	224.3	222.7	208.6	183.4	188.2	244.4	354.8	201.5	101.9	71.95	51.79	35.85	27.73	23.28	48.15
				361.6	311.2	349.3	334.1	319.3	347.9	312.6	320.4	299.3	344.5	312.7	340.9	332.9	328.6	301.7	275.6	248	247.7	252.9	235.5	235.9	235.5	228.3	229	202.7	204	185	175.1	205.9	331.2	249.2	108.3	78.82	59.44	45.72	31.11	22.76	25.01	418
				373.4	328.9	424.4	333.3	307.4	294.7	340.1	305.7	322.1	293.8	343.1	329	336.5	335	295.3	268.8	247	243.3	237.2	236.9	240.6	237.6	219.4	217.1	207.9	193.8	191.4	180	187.3	289.7	292	125.4	79.75	63.61	46.62	33.95	23.39	19.74	80.21
				281.7	326.2	418.5	375.8	313.7	316.9	308.6	303.1	284.5	283.8	340.6	333.2	290.8	325.1	290.6	254.7	264.2	238.1	230.5	230.4	229.2	227.9	225.7	207.9	195.6	195.3	190.5	178.4	176	235.3	322.6	160.6	87.8	69.61	47.05	33.53	22.86	19.35	25.72	881.9
				367.6	387.7	401.2	403.1	320.4	312.3	309.9	297.2	312.1	295.8	311.8	327.1	321.9	322	285.3	254.3	237.8	209.7	215.1	225.7	226.7	214.7	219.2	216.9	200.2	186.1	183.6	183.6	170.2	200.3	301.9	200.8	94.09	72.4	47.97	36.38	24.66	21.7	20.45	169.6
					328.5	345.4	315.1	293.5	332	294.4	292.3	307.6	295.7	297.4	333.2	314	321.7	283.9	246	226.4	223.8	217.8	221.7	213.9	220.7	210.8	216.6	199.7	204.8	185.9	180.5	173.5	176.1	269.8	248.9	100.7	67.5	52.85	35.62	29.85	20.44	17.39	38.73
					372.4	300	317.7	310.5	333.6	298.7	306	301.8	310.2	326.3	311.7	316.5	296.8	273.6	251.8	218	218.1	204.1	211.6	216.2	207.5	211.5	204.9	196	202.8	192.7	178.2	171.7	159	220.1	276.7	133.3	67.01	52.95	35.64	26.95	16.69	17.64	19.75	381.1
					357.4	349.7	301.7	347.8	315.6	312.1	290.8	306	301.3	353.2	292.3	312.2	293	256.4	235.9	205.1	210.1	205.9	201.7	217	202.5	195.7	197.8	191	193.2	189.1	180.7	179.3	159.5	184.5	277.3	164.6	74.74	51.59	41.21	29.99	21.29	16.28	15.51	72.66
						335.1	296.7	286.9	339.9	317.8	325.5	289	303.3	304	293.9	316.4	298.3	268.6	226.4	214.8	215.2	201.2	205.6	198.6	206.4	187.4	194.8	191.7	190.4	187.5	183.5	168.5	168.7	159.8	244	200.5	88.76	52.49	39.01	27.76	23.06	18.04	15.04	24.94	790.9
						359.1	310.5	306.6	309.4	322.7	321.5	301.8	293.2	317.1	317.5	305.6	291.9	268.1	238.7	211.2	201.1	188.7	187	192.6	190.7	181.7	197	189	183.4	185.9	176.4	169.2	160.7	147.2	208.6	217	97.37	52.51	38	30.57	21.66	19.22	13.99	15.36	145
						340.1	297.8	303.1	311.2	306.3	296.4	307.5	312.3	334.9	288.6	283.6	266.3	255.5	214.4	205.5	183.8	193.6	185.3	188.7	185.6	190	185.4	187	181	178.4	173.4	170	159.3	147.1	164.8	234.5	120.8	56.03	39.59	32.9	23.65	18.24	13.45	11.18	32.11	1524
						383	278.3	286.5	305.3	304.2	284.2	307.9	247.4	287.7	299	282.7	271.4	222.7	216.7	197	181.6	178.9	169.5	176.5	179.6	174.8	174.8	184.8	178.7	176.8	168.9	169.3	160.3	143.8	143.6	215.5	163.2	64.89	44.96	29.7	24.14	18.39	15.18	10.65	13.59	338.6
						338.3	374.8	269.6	318.2	322.3	289.4	271.3	249.2	294.3	294.5	273.6	278.7	243.6	226.5	196.4	184.7	171.3	175.9	170.4	173.8	172.8	173.1	186	162.6	171.3	173.6	162.2	159.1	146.9	130.2	184.6	181.2	80.54	42.33	33.47	23.86	20	11.07	9.171	13.4	62.92
						351.3	330.8	279.6	272.6	291.3	283.1	273.4	265.8	276.5	286.7	274.7	265.3	235.9	206.7	189.4	175.2	166.1	170.7	173.4	168.4	171.4	164.3	175.3	178.8	169.7	166.4	165.1	154.3	142.1	127.7	147.8	190.1	95.35	47.58	32.52	23.13	19.15	14.94	10.62	9.306	19.51	730.5
							307.6	263	298.5	310.9	303	295.7	255.4	258.4	306.1	262.1	239.9	230.6	207.3	173	178.9	166.5	156	165.1	158.5	161.5	159.7	168.8	164.9	164.8	166.7	163.3	148.9	141	128.1	118.9	192.3	126.8	50.7	35.35	25.03	20.75	15.38	9.858	10.56	11.35	138.6
							280.4	285.8	278.3	300.9	287.1	283	266.4	298.9	263.5	279.3	243.7	243.7	201.9	180.2	168.6	157.5	163.7	164.5	160.5	161.8	167.3	167.3	163.7	154.9	144.5	147.4	144.5	139.1	121.4	108.6	158.4	148	58.63	35.21	27.52	18.75	14.76	13.56	9.234	9.608	29.19	1385
							313.7	264.2	267.5	289.8	276.7	264.7	264.1	268.8	225.7	297.3	241.8	217.9	193.1	159.7	160.2	142.9	152.9	148.9	160	152.9	152.5	163.5	164.9	165.9	159.6	154.6	141.2	135.6	119.5	100.7	122.1	167.3	76.22	35.04	25.89	19.67	13.26	12.13	9.49	9.297	12.45	306.2
							330.7	341.8	258.3	267	258.9	276	270.1	297	265.2	283.8	245.7	211.8	178.9	163.2	153.8	147.8	150.7	159.2	148.9	144.6	161.8	145.5	157.2	161.9	150.4	153.5	141.2	137.3	113.6	93.88	106.3	160.8	98.84	36.99	25.69	20.68	13.97	13.27	10.09	8.209	9.169	56.24	2543
							291.7	324.1	297.5	268.5	268.6	292.6	252.5	274.5	248.8	252.5	230.6	209.7	192.2	158.3	160.4	138.8	135.9	142	142.6	141.7	144.3	143.3	143.3	142.1	147.1	147.4	134.7	135.1	106.1	96.95	96.4	144.1	117.7	47.64	26.84	22.77	15.42	11.13	9.825	7.523	8.973	14.94	708.5
							496.7	308	298.4	282.7	255.3	260.8	269.3	274.8	228.9	248.7	236.3	218.4	174.6	167.2	150	136.2	141.9	135.6	135.7	126.2	138.4	152.7	138.9	143.3	141.8	149.9	134.7	125.6	114.3	96.57	77.64	120.7	135.2	54.08	24.71	22.65	16.65	12.5	10.31	8.923	7.589	7.417	133.2
								299.6	270.8	248.6	237.6	258.5	235.1	256.5	251.2	275.1	208.7	197	172	152	139.7	137.2	127.5	128.4	131.9	135.1	137.8	140.4	139.4	141	147.7	135.3	138.4	126.1	107.4	99.94	77.17	92	139.8	73.38	28.14	19.88	17.57	14.01	9.235	8.188	7.318	7.139	28.04
								276.6	253.1	242.9	225.7	261.5	223.8	254	234.6	227.3	214.1	200.2	159.2	145	127.1	130.7	134.2	118.8	129.7	127.9	133.5	138.8	138.7	142.5	141.1	136	131.2	121.1	104.6	95.1	76.95	69.98	119.2	87.48	37.97	21.61	15.94	13.44	9.492	8.06	6.658	7.512	11.34
								325.3	249.2	261.7	271.6	236.1	242.6	232.8	213.8	233.1	215.7	175.2	150.8	129.1	136.6	124.9	121.9	118.5	131.5	121.8	127.9	124.6	127.4	134.2	134.4	130.1	130.3	113.5	105.8	94.54	73.15	66.12	101.5	102.9	39.34	20.5	17.88	12.29	9.789	8.899	6.311	7.607	7.568
								269.9	230.1	232.7	269.1	210	227.4	224.9	226.3	225	181.9	185.9	153.2	142.4	121	123.5	117.5	109.4	119.1	121.1	126.1	122.4	119	128.1	134.3	125.4	135.3	112.3	107.9	90.8	76.53	62.22	87.77	112.3	50.72	25.37	16.59	13.36	10.89	8.409	4.855	7.263	6.583
								500.5	279.6	246.7	246.1	233.9	245.1	242.4	222.2	214.7	181.4	176.5	157	138.7	120	116.5	106.6	112.3	104.1	110.5	116.3	117.9	125.4	117.4	120.6	119.5	116.5	111.3	103.2	85.1	71.46	59.82	64.38	106.4	68.45	23.29	16.73	13.17	9.541	6.636	5.41	5.644	5.592
									248.5	246.8	230.1	237.6	217.7	226.4	207.7	205.7	171.4	166.1	143.2	133.1	120.4	107.2	109	95.6	104.7	109.9	108.3	121.5	119.5	118.7	117.8	115.7	110.3	103.8	103	78.84	70.48	57.52	56.33	89.62	81.57	31.47	17.62	11.38	10.52	8.279	8.371	6.13	5.766
									267.2	219.8	219.8	204.2	211.7	207.3	199.6	193.9	154.2	149.3	143.7	112.1	104.5	103.1	107.9	102.6	105	100.3	108.3	105.3	110.9	116.1	109.6	113.6	112.2	107.9	98.12	73.8	61.33	52.67	49.06	74.3	93.21	40.34	18.67	13.31	9.191	7.978	6.898	5.432	6.162
									224.3	194.2	248.7	212.7	194.1	208.6	209.6	190.2	174.4	156.7	133.9	113.3	108.6	95.04	94.1	105.9	106.6	95.16	101.1	103.6	103.6	110.2	110.7	109.2	107	100.3	92.31	76.87	61.4	53.91	51.7	51.92	89.73	49.66	22.06	14.04	11.27	7.911	6.361	6.405	6.401
									256.5	213.4	205.6	218.2	191.4	196.7	198.4	195.6	165.4	153.9	130	118	92.09	90.85	98.81	93.06	103	94.77	101.3	99.46	101.9	97.78	106.7	103.1	98.08	97.57	85.58	78.23	67.06	55.48	44.41	43.51	79.72	63.73	24.92	14.01	12.6	8.622	7.943	6.554	4.823
									485.2	217.3	202.5	214.4	184.8	184.1	188.6	162.8	161	136.7	125.6	99.26	96.2	93.12	97.08	84.99	94.05	92.4	92.83	98.31	90.7	98.12	98.58	99.88	98.73	96.88	80.01	72.49	62.37	52.84	46.76	39.22	71.94	69.91	31.62	15.35	11.5	9.691	7.379	6.91	4.761
										203.7	199.3	189.5	185.9	181.5	198.3	168.1	153.3	133.4	128.1	100.9	80.02	89.9	77.31	85.9	84.61	91.32	92.73	91.34	91.24	90.6	92.35	97.44	94.89	91.37	84.31	70.69	58.99	48.33	42.39	34.51	49.53	73.02	36.9	14	9.391	7.813	6.824	6.477	6.44
										210.8	203.2	188.3	178.2	176.2	186.3	163.6	155.1	131.5	116.4	88.7	88.66	82.3	81.42	78.18	85.08	83.02	84.54	85.55	90.55	91.04	91.79	92.03	90.91	90.55	76.77	70.44	60.32	50.75	41.53	32.01	35.3	65.75	52.33	18.58	12.15	8.764	8.275	7.029	6.869
										206.9	198.5	190.2	163.7	180.5	171.6	158.2	151.5	134.4	98.59	99.93	89.3	80.29	75.21	74.16	69.46	76.12	77.89	86.94	89.84	84.54	88.9	90.34	90.71	83.09	74.18	67.26	56.75	47.55	40.72	32.47	28.92	58.66	60.16	21.94	11.02	8.766	7.903	6.658	6.02
										190.7	177.7	197.3	163.8	176.1	164.2	144.6	131.8	121.8	113.5	97.82	77.17	82.47	66.66	72.97	71.52	77.41	82.93	78.29	76.6	81.92	84.58	82.23	75.56	81.43	77.19	64.13	55.45	43.53	42.12	33.04	28.78	45.6	61.71	27.09	12.55	9.237	8.097	8.903	4.817
											158.6	164.8	162.8	154.6	159.6	151.1	145.5	114.9	97.82	91.4	72.42	72.33	67.37	67.14	71.32	79.48	82.25	77.65	78.76	76.24	77.78	85.91	83.32	79.09	68.85	60.42	55.44	40.77	37.61	29.63	26.28	34.56	63.97	38.11	15.79	8.368	9.401	6.641	5.727
											171.1	173.6	165.2	189.2	153.4	152.3	141.5	113.1	104.9	86.66	82.08	70.47	62.31	67.64	73.86	71.35	71.28	74.53	73.6	80.94	72.86	80.31	82.12	81.07	73.36	64.47	59.17	40.27	40.77	31.19	26.71	25.22	50.78	44.83	18.66	11.92	8.751	7.324	5.54
											193.2	174	169.4	174.3	156.3	148.5	128.2	101.3	100.5	79.81	70.18	71.51	69.68	60.79	65.94	70.03	71.01	72.12	77.33	76.29	75.9	74.04	77.98	72.69	70.35	58.42	53.1	41.67	39.37	30.9	25.53	24.29	42.91	53.25	22.91	10.42	10.09	6.811	5.921
											189.8	154.1	181.5	166.6	148.5	139.2	121	104.4	98.57	73.06	78.08	77.19	65.04	61.73	65.42	63.12	79.66	76.58	66.87	71.78	70.3	74.2	73.23	71.75	63.36	54.52	49.35	42.47	37.13	28.19	24.59	20.44	32.35	51.8	30.31	13.63	8.523	6.511	6.642
											206.2	164.1	170.7	154	161.2	137.8	130.2	97.73	85.8	69.92	69	64.37	62.98	56.68	60.57	59.43	61.84	66.71	66.82	69.69	64.45	73.99	72.2	64.1	65.81	52.32	51.05	41.02	31.12	31.61	27.69	19.6	23.96	48.35	36.71	12.48	9.698	8.004	6.612
												157.5	156.5	153.8	144.9	131.5	127.9	105.6	85.49	70.71	60.74	65.52	56.57	63.29	55.13	57.77	60.25	62.81	62.33	67.62	65.15	68.96	68.45	63.16	66.75	53.55	47.38	36.32	34.54	27.05	24	21.04	22.43	43.55	44.81	19.29	8.485	9.034	7.894
												158	139.5	145.8	160.1	125.9	116.6	98	80.85	70.78	58.43	54.89	57.88	53.44	56.35	59.03	57.49	56.36	63.04	62.75	64.39	66.73	64.72	64.24	57.32	46.66	47.91	36.15	34.76	31.6	25.59	19.08	19.48	30.84	45.26	23.32	11.6	7.793	8.896
												164.9	164	153.2	135.7	126.2	111.6	89.88	78.69	71.74	56.1	56.45	52.42	48.08	47.09	54	50.15	53.98	54.64	60.45	61.61	56.78	61.34	55.47	52.64	44.93	43.32	34.18	32.92	26.9	23.88	19.21	16.21	26.05	45.93	32.99	13.88	7.859	7.143
												144.4	150.1	149.1	127.2	120	100.1	86.71	72.57	66.13	55.57	62.01	47.95	49.9	48.48	49.59	43.85	48.51	58.2	52.19	65.56	52.95	55.74	54.78	54.21	48.14	39.5	34.18	28.91	25.13	22.61	18.65	17.79	20.31	40.47	40.11	15.09	7.285	6.714
												159.2	150.3	136.1	132	123.1	100.3	84.4	70	63.1	57.88	60.65	48.07	47.92	58.23	48.22	48.24	54.08	55.82	58.15	54.04	55.82	55.06	54.63	52.24	45.68	44.09	37.37	29.19	24.52	19.97	18.43	18.15	18.8	30.56	42.54	20.71	10.23	6.945
													177	146.6	131.3	124.8	101.8	82.97	61.59	61.23	55.47	49.61	46.22	47.67	47.73	45.81	46.48	47.95	46.86	54.56	57.74	55.37	47.82	46.84	50.04	44.37	35.35	33.24	29.74	23.59	23.33	21.45	16.31	19.56	25.28	46.41	23.59	12.57	6.912
													155.6	121.4	134	109.9	91.96	72.49	62.22	56.83	50.98	42.5	47.9	45.95	48.41	42.6	43.69	46.68	49.46	51.15	47.92	51.59	51.06	49.37	45.97	40.12	34.44	29.61	25.72	21.41	20.82	18.63	14.84	16.82	16.25	38.1	31.86	14.15	8.549
													150.5	133.7	135.4	110.1	90.54	71.23	63.44	56.66	48.78	43.69	39.13	45.54	44.17	39.38	45.31	44.91	45.45	50.59	50.19	48.96	52	49.23	42.95	43.53	34.12	29.27	27.34	22.62	19.66	19.19	17.98	16.08	16.01	32.33	34.48	16.26	6.45
													153.9	134.4	116.7	112.8	98.9	67.81	59.86	57.98	50.31	45.88	41.26	37.75	42.24	37.16	38.14	38.42	43.26	45.68	47.97	43.15	48.48	47.36	41.79	39	33.63	27.29	27.2	24.21	21.27	15.64	17.92	14.88	14.03	21.56	36.53	21.88	10.05
													163.5	129.6	122.8	110	84.71	65.49	57.69	51.47	40	40.85	40.62	39.94	40.58	40.99	38.86	43.88	44.02	42.26	45.81	44.63	47.1	42.27	42.13	33.49	33.64	29.33	24.27	23.81	21.99	18.53	16.59	14.48	14.12	16.34	35.18	24.37	11.23
													257	121.6	121	110.1	79.88	64.31	57.98	50.52	43.74	43.49	40.61	41.68	37.14	37.4	41.69	41.46	41.41	42.59	42.6	46.89	46.07	42.6	45.6	36.1	27.76	27.33	22.09	20.21	19.86	17.8	13.84	15.86	11.87	14.15	31.28	28.31	13.38
													765.1	130.1	112.3	107.9	72.1	62.68	60.22	52.45	43.73	39.65	35.46	38.12	34.76	38.72	41.15	37.04	36.97	36.62	43.69	45.18	43.05	42.56	39.52	31.89	27.21	27.07	24.49	22.51	19.79	18.22	14.57	14.53	13.71	11.57	26.38	31.25	15.91
														139.9	112.2	87.81	97.2	62.61	49.91	43.76	39.3	36.58	34.76	30.41	33	34.26	34.83	33.38	34.61	40.74	42.31	38.96	41.01	40.1	35.48	28.22	27.91	23.22	23.68	21.48	17.12	17.01	13.16	14.76	11.99	10.97	17.66	32.66	20.71
														128.7	116.7	92.91	73.12	51.44	49.89	40.15	38.85	35.21	34.66	31.54	33.02	33.98	34.7	37.95	35.27	37.02	38.53	36.32	38.79	37.45	31.62	31.34	30.5	23.97	24.46	20.73	19.59	16.69	13.69	13.28	11.38	12.04	15.46	28.24	24.25
														134.8	120.1	96.63	73.96	56.28	48.69	39.5	36.19	34.22	35.16	28.56	30	31.64	32.8	32.28	36.07	31.58	35.27	34.61	37.17	35.68	27.47	28.2	27.62	25.1	20.3	19.26	17.9	15.07	14.84	14.15	11.82	10.29	12.27	23.6	26.38
														212.3	119.4	90.62	69.18	56.58	44.58	41.3	31.42	29.96	35.03	30.29	30.71	28.01	30.4	32.37	30.43	32.71	32.97	34.63	34.59	31.12	31.47	32.41	24.8	22.12	18.33	18.1	15.17	16.59	15.2	14.46	10.61	9.49	10.35	22.05	31.01
														637.3	112.3	91.91	63.13	58.84	43.91	36.77	35.12	30.52	29.19	28.75	30.12	29.38	29.25	29.01	30.3	33.02	37.54	33.56	30.06	30.23	27.75	29.51	25.33	23.08	19.77	18.6	14.75	15.72	14.13	11.83	11.43	10.82	8.696	15.5	25.5
															110.1	75.45	61.8	54.24	47.58	30.9	31.79	29.79	26.45	25.33	31.39	26.3	28.93	30.86	30.54	28.64	31.45	31.66	29.88	28.87	29.05	27.76	22.75	20.91	18	17.05	12.7	13.1	12.45	11.07	11.34	11.2	10.01	12.12	21.95
															89.25	73.78	61.59	54.57	43.64	32.45	30.75	25.5	28.85	30.39	26.82	24.54	26.15	29.42	27.58	27.62	29.35	32.87	33.44	28.7	28.81	26.2	22.96	23.02	16.96	17.21	15.59	13.75	11.83	13.27	11.06	9.598	9.268	8.94	18.02
															98.32	76.66	61.65	55.15	43.22	34.57	25.57	25.22	25.75	22.71	24.29	23.54	26.27	27.67	26.46	28.88	30.69	29.5	27.44	27.52	25.4	26.33	21.17	20.04	18.97	13.51	13.93	12.41	13.46	10.64	10.01	10.19	8.453	7.406	15.33
															168.3	82.41	59.15	50.54	40.23	33.93	30.19	27.94	27.36	21.11	25.31	24.86	26.08	25.14	25.42	24.72	26.88	29.4	26.92	28.37	25.91	25.7	21.42	18.9	17.72	14.89	14.34	14.07	11.73	10.25	9.243	8.323	8.227	6.741	10.36
																81.82	58.67	45.25	32.78	26.69	27.92	28.13	23.55	25.32	23.42	22.62	24.07	24.01	26.48	25	24.34	28.77	27.51	24.8	22.48	20.22	18.31	16.64	17.02	15.22	14.41	14.19	11.7	9.764	8.709	8.49	8.582	8.417	9.619
																63.97	51.21	46.28	34.37	29.93	23.51	23	21.39	22.25	22.36	23.77	23.35	22.96	22.88	23.31	25.39	26.19	24.08	22.21	21.78	20.03	17.48	16.4	14.19	13.86	14.52	12.34	10.57	10.12	8.882	7.511	7.734	8.373	6.553
																82.51	59.65	48.03	32.38	28.06	26.18	23.62	22.53	21.13	20.87	23.05	21.47	22.44	20.81	21.25	23.28	24.13	23.91	25.56	20.89	21.49	18.57	15.7	15.56	13.36	13.03	11.15	12.62	10.11	8.059	7.198	7.645	8.523	7.058
																79.4	54.68	37.37	31.81	24.37	23.43	20.81	16.76	21.98	21.3	20.33	22.79	20.21	18.91	23.97	22.65	24.13	24.17	22.69	20.32	19.29	19.5	15.64	15.74	13.5	12.87	8.331	10.88	9.674	9.226	7.885	7.347	5.959	6.372
																	60.53	36.64	29.57	28.03	22.57	20.73	17.96	18.72	17.49	19.82	20.54	21.23	20.8	20.65	24.93	21.87	20.44	22.12	20.81	16.34	15.22	13.61	13.36	12.45	12.87	10.41	9.595	8.365	9.445	8.204	6.584	6.839	7.305
																	51.33	42.23	26.79	23.54	20.57	18.99	17.48	17.21	20.28	21.76	18.78	22.37	20.91	19	20.07	20.95	20.5	19.07	17.76	16.09	14.25	13.79	13.7	11.97	10.83	9.113	9.913	8.206	8.867	8.612	6.288	6.752	6.911
																	54	33.41	34.4	23.45	15.71	17.11	19.77	17.34	16.43	18.97	18.93	18.37	18.56	17.92	17.37	19.01	20.58	20.96	15.39	17.2	14.77	13.45	13.93	10.61	10.43	7.696	9.191	9.579	8.619	8.541	7.735	5.203	6.466
																	47.86	36.67	36.77	22.94	22.37	19.04	17.24	14.76	16.21	19.48	18.36	16.22	14.55	18.06	17.7	20.94	16.73	17.92	15.36	16	12.94	11	12.69	10.77	9.812	9.759	9.797	7.629	7.188	6.502	7.276	5.808	5.792
																	64.1	43.48	26.87	26.62	19.78	19.83	17.92	16.53	15.01	14.61	19.71	17.34	17.26	16.22	13.73	18.71	17.43	19.57	14.86	15.89	13.47	12.78	12.84	11.26	9.894	8.72	7.675	9.475	7.116	6.719	6.643	6.146	5.243
																	99.01	34.42	27.77	19.34	19.37	15.22	15.67	14.45	11.39	15.04	13.85	17.44	14.78	15.63	15.59	19.45	19.31	16.25	17.55	12.28	11.57	11.03	11.68	9.416	9.203	8.794	7.171	7.374	7.595	7.045	6.439	5.35	5.671
																	273.1	36.09	36.2	21.42	19.16	18.69	15.08	15.61	14.61	15.13	15.01	11.27	14.02	17.68	16.82	16.68	18.14	16.79	12.73	12.31	11.48	10.77	9.676	8.991	7.366	8.328	8.357	7.31	6.71	6.946	5.033	4.689	5.254
																		27.85	26.48	22.2	14.58	15.57	12.82	12.01	14.15	13.27	13.74	12.78	14.9	18.06	14.08	13.8	16.26	13.91	11.59	12.82	10.34	10.3	7.928	9.217	7.797	7.357	7.227	8.601	6.821	7.093	6.608	5.649	4.915
																		35.44	24.71	22.86	16.83	15.78	11.28	13.59	13.25	13.93	13.48	13.88	12.53	14.5	11.97	15.8	16.14	12.99	13.9	11.99	9.651	9.833	9.194	7.853	8.05	6.981	6.278	6.524	5.683	5.948	5.84	6.307	4.458
																		38.49	22.95	22.28	15.2	14.62	13.84	13.36	15.29	14.34	11.69	10.5	12.66	13.1	13.2	13.79	13.32	12.31	12.24	10.05	8.751	8.919	9.164	9.074	8.613	6.688	8.015	6.636	5.127	5.766	5.013	5.423	5.635
																		75.19	18.96	18.51	15.82	12.22	14.18	13.82	11.76	11.97	10.27	10.26	13.55	13.53	14.02	13.22	14.39	12.71	12.55	11.58	9.342	7.211	8.234	7.042	8.246	7.486	6.116	6.868	5.059	4.222	4.049	5.211	4.058
																		212.7	23.99	19.38	14.81	13.12	14.78	11.77	12.22	11.11	10.38	13.26	11.93	12.18	15.58	13.6	14.11	13.53	12.05	10.96	10.47	7.195	9.429	8.079	6.353	7.268	6.564	4.695	5.993	5.853	5.226	5.319	3.752
																			25.86	20.25	15.74	14.49	14.04	12.85	10.53	11.69	10.86	12.77	11.98	12.41	12.31	12.18	12.72	11.93	11.01	9.77	8.999	8.335	8.132	8.216	8.319	6.729	6.513	6.748	4.657	4.767	5.676	4.341	5.488
																			23.17	18.26	15.15	16	14.79	13.2	9.473	10.34	12.52	9.791	10.27	13.36	12.48	10.5	10.11	11.16	7.624	8.441	8.327	8.547	7.529	6.213	5.563	7.485	4.67	4.392	4.129	4.225	4.157	4.407	3.898
																			28.66	15.69	17.38	11.67	11.04	13.09	10.22	8.928	10.87	11.69	10.03	9.365	10.8	10.55	10.35	10.94	9.4	9.139	8.117	7.448	6.845	5.188	5.387	5.286	4.217	5.1	4.89	4.543	4.747	4.47	3.93
																			54.21	20.57	15.4	11.92	8.934	10.78	8.87	10.77	10.9	8.351	11.04	9.375	10.44	10.95	12.42	9.962	9.399	9.22	7.711	6.649	6.55	4.873	5.75	5.516	5.112	4.82	3.996	4.795	3.775	3.335	3.498
																				17.32	15.37	11.72	10.01	9.192	9.378	9.048	8.892	8.574	9.661	9.271	10.56	10.71	10.02	7.884	7.692	9.736	8.078	5.231	6.428	4.947	4.443	5.958	6.002	3.815	3.219	3.52	3.681	3.085	3.105
																				17.77	13.18	11.99	12.63	7.988	7.554	8.748	10.2	7.425	9.695	10.68	8.765	10.46	8.837	9.233	8.575	6.448	5.974	7.071	6.758	4.408	5.619	5.12	4.115	3.603	3.588	4.218	4.006	4.035	2.725
																				18.35	14.87	10.17	9.85	10.47	8.421	10.34	7.592	7.897	8.662	9.515	10.31	7.199	6.815	9.001	7.627	6.957	5.231	6.469	5.763	4.599	5.513	4.858	5.417	4.302	3.318	4.142	3.422	3.403	2.921
																				21.33	16.91	12.91	10.02	10.46	10.45	9.396	7.009	4.809	6.093	9.2	7.064	6.359	7.508	7.72	7.739	6.334	5.097	6.33	5.814	5.091	4.235	3.267	3.812	3.507	2.767	2.916	2.677	3.202	2.973
																				42.25	13.92	10.98	9.991	12.1	11.5	7.267	8.413	7.975	7.346	8.043	8.035	6.643	10.12	6.18	7.541	6.295	5.738	5.435	7.211	4.794	4.29	4.695	4.967	4.854	3.748	3.077	3.576	3.147	2.955
																				137.8	14.09	12.1	9.411	8.182	9.215	7.547	9.671	8.153	6.642	7.785	6.646	7.371	6.303	7.096	6.426	6.049	5.17	6.536	5.491	3.307	4.061	5.391	3.704	3.692	3.615	3.501	2.461	2.721	2.588
																				372.5	18.53	11.26	9.602	9.016	9.212	5.805	7.742	7.12	7.907	7.461	5.928	9.221	6.112	5.676	7.04	6.017	5.105	5.049	4.22	3.707	3.303	4.096	3.634	3.864	3.03	3.28	2.34	3.245	2.262
																					14.13	9.071	7.911	6.259	8.172	8.048	7.91	7.804	6.496	7.573	5.737	6.888	4.965	5.454	6.478	4.875	5.235	4.44	4.356	3.057	3.618	4.55	3.267	3.655	3.418	3.511	2.511	2.839	2.505
																					18.73	9.341	9.467	6.737	8.264	6.541	7.584	6.699	8.354	7.786	5.659	7.276	5.39	5.275	4.935	6.595	4.451	5.227	3.889	3.548	2.957	3.964	2.423	2.838	2.831	2.846	2.433	2.241	2.243
																					42.7	14.54	11.59	6.281	6.669	4.945	4.749	5.858	6.115	7.868	4.689	6.339	5.314	4.997	5.568	6.115	4.815	5.063	4.058	3.974	2.766	3.279	2.124	2.468	2.799	2.43	2.109	2.084	2.479
																					113.1	11.86	13.15	5.919	7.229	7.42	5.425	5.674	5.383	5.831	5.189	5.196	6.014	5.898	4.428	5.318	4.931	3.693	3.9	3.363	2.406	2.966	2.753	2.539	3.447	1.964	2.028	2.4	2.455
																					309.3	10.12	7.8	7.286	7.077	7.288	5.384	5.992	5.229	6.501	5.066	6.08	5.03	5.588	3.986	5.413	4.868	4.271	3.434	3.855	2.948	2.981	2.694	2.377	2.664	2.487	2.16	2.498	1.241
[truncated: 1 more columns]
