# Supplementary material for: Utilization and transformation of Chrysotila dentata-derived dissolved organic matter by phycosphere bacteria Marinobacter hydrocarbonoclasticus and Bacillus firmus
Source: PeerJ. 2024 Jan 4;12:e16552. doi: 10.7717/peerj.16552 (PMC10771764; doi:10.7717/peerj.16552)
Supplement: Supplemental Information 10 [file peerj-12-16552-s010.xlsx]

## Sheet: Sheet1
15.06	120.6	49.77	121.5
72.56	57.08	115.9	295.2
65.41	75.55	107.1	252.2	307.5
92.89	99.83	90.03	488.2	398.1
63.3	42.38	173	251.7	568.6	445.5
46.76	85.59	138.8	160.7	540.9	381.1
142.6	151.3	173.4	178.8	630.2	639.4
121.3	108.8	99.71	88.65	475.2	750.9	290.8
77.32	122.1	108.6	93.36	268	918.9	373.9	2193
137.5	167.2	154.1	80.11	183.2	746.6	598.9	512.2
152.9	141.5	73.82	165.1	221.4	598.1	926.6	305.8
87.2	57.95	72.81	109.1	113.9	394.4	1038	412.1
106.7	160.4	165.2	124.1	185.1	218.6	816.3	680	303.5
144.2	151.3	127.4	137.2	222.4	99.66	494.8	964.5	282.6
227.5	197.9	180.8	65.87	170	138.9	303.9	919.5	409.6
308.6	173.1	119.9	199.6	88.72	178	151.8	781.2	699	268.8
241.7	164.8	226.9	130.5	129.5	156.1	117.9	540	1073	298
172.4	84.25	267.6	121.1	139.7	149.8	117.5	279.5	1165	488	326.5
340	67.54	148.6	137.3	129.7	126.8	61.65	125.5	990.1	881.1	189
249.7	152.4	189	159.5	131.5	124.1	68.05	86.9	534.4	1273	333.3
149	103.1	142.4	402.1	134.1	95.9	75.17	81.27	285.7	1184	622.8	238.1
147.6	213.7	337.1	304.6	176.7	135.5	84.76	100.7	158	965.9	1055	236	1356
117.3	192.1	189.2	207.7	208.5	168.6	147.2	85.83	99.16	535.3	1320	359.8	365.6
171.4	170.3	135.5	208.9	239.7	274.4	130.1	85.36	53.23	222.5	1374	753.6	228.9
294.5	216.1	136.6	230.9	259.5	298.2	116.4	83.33	78.38	145	991.6	1137	234.1
181.5	280.5	192.6	203	462.1	307.1	148.4	70.14	64.01	89.77	555.2	1498	396.2	315.5
220.5	226.4	112.7	312.7	440.7	408	157.6	82.74	82.69	86.97	277.2	1489	751.7	255.7
132	152	138.8	344.1	398.1	404.8	211.4	89.34	104.1	102	167.7	1124	1254	302.6	426.1
233.4	149.5	259.1	382.9	480.2	433.5	227.1	114.1	90.12	101.4	105.9	694.2	1727	481.6	272.3
243.7	269.3	304.4	489.4	613.1	474.4	299.3	147.2	75.98	89.03	128.6	374.6	1696	802.5	291.7
237.3	238.7	337.7	365.7	756.4	586.3	339.4	153.3	118.4	101.2	127.5	197.8	1296	1404	362.9	404.9
225.5	338.2	315.2	538.5	631.1	684.9	397.3	169.7	116.9	142.5	100.4	204.7	788.2	1866	584.6	354.7
305	266.4	324.5	598.3	675.3	674.6	440	201.3	148.5	116.6	150.4	203.5	467.8	1938	964.7	374	570.4
131.3	293.8	282.4	458.4	508.9	796.5	470.6	256.9	165.9	158.4	185.8	201.9	297.1	1492	1584	460.6	386.1
139.2	188.4	337.6	515.7	692.3	797.3	528.5	240.1	180.2	167.4	168.8	230.1	254.9	936.5	1975	653.8	372.7	746.5
290.1	208.4	254.9	536.6	801	713.9	522.6	274.2	202	194.8	197.3	247.6	250.3	596.6	1989	1054	394.4	373.3
231.1	138	294.8	409.8	718.4	623.5	489.2	280.8	180.6	183	209.5	243.4	297	439.3	1671	1624	462.8	317.1
148.6	219.3	278.6	589.2	712.2	736.7	504.7	318.1	236.5	194.2	246.5	285.1	316.5	418.7	1089	2139	632.7	330.3	390.5
247.3	307	211.3	386.5	881.6	706.8	606.8	357.8	241.7	238.6	233.7	315.3	366.5	425.3	713.4	2153	1044	355.9	259
111.4	241.6	242.1	477.4	608.9	767.6	586.8	331.8	234.1	221.3	266.6	311.1	332.1	471.5	566	1776	1573	390.8	234.7	471.5
238.6	139.3	208.2	428.9	678	645.8	507	382.3	261.4	239.1	304.5	315.7	400	477.4	550	1221	1938	541.3	262.8	222.5
114.5	308.5	282	477.9	732.8	723.3	588.3	337.7	256.2	254.2	331.1	390.3	477.9	538.9	596.5	844.3	2053	909.5	273.2	175.6
110.8	222	160.4	510.6	914.4	704.6	612.4	410.1	294.4	336.8	419.2	455.4	464.1	572.9	622.6	737.7	1713	1348	311.1	167.6	232.1
175.6	124.8	323.1	419.4	913.3	862.7	623.5	451	295	362.6	442.1	446.9	533.4	671	696.5	687.2	1213	1793	447.5	178.2	143.9	1497
171.8	195.1	217.4	710.4	912.9	866.7	580.6	419.1	319.1	354.5	442	511.4	579.9	706.6	764.9	734.2	886.8	1929	729.8	194.2	141.1	320.8
149.9	113.3	213.6	584.3	1289	1012	648.5	407	341.3	364.9	436	531.1	675.1	741	808.1	765.2	745.9	1604	1157	245.6	128.3	138.2	3025
127	168.7	154.1	499.6	1197	1035	689.7	399.1	357.8	412.5	471.5	549.7	718.4	800.7	857.3	826.5	705.3	1164	1522	340.2	136.5	111.3	614.4
176.3	222.6	134.7	854.3	1413	1014	632.8	444.9	417.9	406.8	419.3	587.7	735.4	819	900.7	861.4	746.2	851	1637	597.6	145.7	123.3	171.7
146.6	179.8	243.8	568.4	1408	1008	687.1	469.5	461.6	425.1	517.6	636.6	747.8	847.5	919.3	825.8	743.3	677.5	1374	951.6	196.2	113.5	113.5	1168
297.7	74.39	236	718	1327	955.3	748.3	526.6	440.5	419.9	477.1	667.6	780.9	872	943.7	897.2	743.4	654.4	1032	1250	275.4	109.4	103.3	257.1
153.2	81.65	270	698.5	1106	1086	704.7	500.2	423	466.6	551	655.3	824.5	907.2	997.2	908.2	789.5	605.8	699.1	1311	474.3	119.7	86.48	106.6
123.7	243.8	180.6	591.2	1263	1067	759.3	515.7	416.3	440	556.5	639.9	807.7	891.6	971.4	927.9	789.4	602.1	562	1121	765.4	123.2	99.26	87.83	455.2
145.1	110.7	210.5	485.7	1320	1286	716.7	596.8	457.5	452.4	580.2	658.4	811.9	868.1	927.9	935.6	762.3	632.9	495.1	850.6	1037	224.5	105.2	90.53	132.4
172.6	170.6	175.3	547.9	1266	1075	662.7	555.2	440.3	444.5	564.4	647.1	763	907.2	943.5	890.4	801.7	640.3	470.6	551.8	1149	394	107.1	88.61	89.13	888.7
163.3	229.7	265.3	699.8	1140	1005	695.1	519.3	495.2	481.2	561.2	642.6	827.2	909.9	924.6	902.4	800.7	680.3	483.4	394.3	1014	647.6	131.6	97.68	81.81	202.9
152.5	145.6	292.1	632.2	1125	999.7	722	528.6	436.5	446.4	526.9	655.8	783.7	914.9	940.3	952.7	799.7	656.3	504	334.5	728.1	851.6	207.4	107.9	94.69	100.6	1596
67.73	76.68	216.6	553.1	1020	1006	821.5	526.9	506.8	467.3	501.2	615.8	734.3	867.6	870.9	908	735.9	657.5	495.9	332.2	468.6	1017	348.1	112.5	100.2	96.66	342.9
93.09	212.2	216.6	648.4	1186	954.4	732.3	623.1	501.5	453.7	460.8	644.2	745.1	857.8	896.9	857.4	756.4	610.1	499.5	340.8	340.5	874.2	544.2	139.4	110	95.58	120
112	108.7	120.8	464.7	942.9	935.8	686.7	528.4	438.2	445.3	521.7	648.2	739.7	785.8	867.9	840.2	760.8	651.2	474.6	346.3	279.8	664.3	778.1	192	122	107.8	94.88	570.9
124.2	163.4	184.1	398	853.2	956.1	673.1	493.8	445.4	379.7	447.7	570.1	698.1	816.9	787.8	825.6	770.1	632.8	496.6	355.2	279.3	449	899.4	324.1	133.7	107.4	87.63	154.9
122.5	219.6	192.2	486.6	897	811.8	646.2	474.3	414.8	410.8	469.3	580.3	685.4	737.6	831.7	819.9	730.8	643.7	495.5	337.7	258.1	337.3	827.3	513.7	148.6	116.1	98.07	91.15
184.2	186.8	85.31	381.9	914.1	875.5	738.1	557	454.7	398.7	476.5	572.1	642.2	724.7	800	745.2	725.9	613.6	474.2	351.4	261.2	271.2	686.3	693.4	197.1	138.7	117	80.2	230.3
135.8	126	72.98	495	1017	859.8	600.1	546.3	408	402.5	452.6	568.3	640.5	695.3	797.5	776.3	669.2	618.2	488.6	358.1	276	247	475.6	846.5	303	143.8	115.3	86.87	91.18
120.2	145.5	215.6	405.4	715.6	829.1	656.1	484.9	394.3	394	444.7	508.2	637.9	669.3	817.1	745.7	693.3	599.8	452.8	352.9	287	260.6	329.6	811.7	483.5	169.9	122.5	94.44	66.13	399.5
101.7	162.2	77.43	392.3	701.6	922	607.9	528.3	409	403.8	417.9	451.5	594.9	653.4	738.8	679.9	672.6	580.5	479.1	382.7	300.2	262.7	278.5	646.4	628.1	203.7	127	97.19	70.3	111
172.2	150	180.1	409.6	673.2	829.2	628.5	503	392.3	377.1	365.1	480.9	574.2	635.1	724.3	680.8	640	561.4	458	378.4	309.5	274.5	265.1	485.3	766.2	284.8	140.2	100.7	73.45	61.72	876.2
134	125.9	144.2	378.1	690.9	734.6	644.2	429.9	433.8	382.6	403.9	447.1	550.3	617	653.7	657.8	625.8	518.2	467.4	381.4	309.4	278.6	250.4	362.6	762.6	439.8	148.3	115.3	87.11	60.5	186.2
130.4	137.8	130.7	366.5	565.9	744.9	672.4	464.8	403.1	394.5	375.1	487.5	541.4	580.9	667.2	664	595.3	530.1	454.1	380.3	310.2	288	270.9	283.8	616.7	590.9	193.5	113.4	90.84	59.7	70.12
74.99	84.41	101.9	355.2	627.2	654.3	608.4	440.2	392.3	368.2	394.2	391.2	541.5	568.8	626.1	606.8	598.8	518.3	458.7	371.1	301.8	290.5	288.5	266.3	494.5	707.3	259.3	117.9	87.99	62.44	56.76	366.8
22.49	213.8	88.28	328.1	576.7	501.9	538.4	388.1	391	375.1	377.7	431.3	500.7	547	571.2	554.6	598	508.3	458.9	378.3	326.9	302.6	275.3	274.9	360	714.5	362.8	136.9	92.6	65.51	55.21	99.34
113.5	49.7	153.7	328.3	443.5	590.7	480.5	468	449	414.4	339.2	427	549.2	542.7	586.3	579.7	589.4	531.9	458.6	383.2	312.8	302.5	290.6	273.7	298.7	618.8	526.2	163.2	95.35	65.7	52.29	59.92	787.4
177.5	28.68	139.5	377.3	789.7	582.5	548.5	447.4	396.2	396.8	350.4	371.3	435.4	547.1	557.2	584.2	504.5	475.2	442.8	373.8	315.8	312.5	298.2	277.4	291.1	468.4	624.6	223.7	120.8	78.07	63.12	52.78	162.2
102.6	40.72	281.4	478.7	635.8	467.6	495.3	398.4	407.9	395.4	393.2	407	456.8	507.8	556.1	561.8	506	482.6	420.8	368	324.6	307.6	291.1	288.2	284.9	369.1	646.9	323	129.8	88.84	55.91	49.81	62.92
148.4	89.9	113.8	222.4	638.9	425.3	478.8	404.1	379.8	360.1	375.6	374.4	475.6	526.5	518.1	537.9	510.8	485.8	425.9	357.7	328.4	307.3	307.6	295.6	269.9	288.6	570.6	441.9	147.6	93.01	75.96	58.56	47.85	345.1
125.5	104.1	101.9	257.2	464.9	531.3	467.3	419.6	376.3	381.6	357.2	420.9	419	495.6	520.9	503.7	515.3	461.2	416.1	367.7	318.9	316.6	307.9	304	270.2	270.7	448.4	571.1	186.5	98.82	77.35	62.21	49.07	89.17
181.9	73.58	140.6	324.2	479.9	542.5	442.9	430	382.8	364.3	337.3	393.1	460.7	467.8	530.6	474.4	483.4	472.7	423.4	342	321.2	320.7	308	300.9	278.7	253.1	339.7	591	283.8	104.2	80.56	67.92	52.46	54.47	746.8
153.4	161.4	134.7	350.9	537.2	472.1	495.5	403	372.8	383.2	314.5	388.4	403.3	440.6	438.3	460.3	478	430.6	419	347	326	334.4	319.7	299.7	299.9	259.9	273.4	536.4	375.2	122.3	90.47	67.87	58.59	47.26	157.9
169.1	187.3	65.38	359.1	475.4	544.9	510	431.1	330.4	354.3	346.7	366.8	413.6	446.2	458.5	476.1	464.4	474.8	394.7	351.9	320.9	304.2	302.5	306.3	275.4	262.7	253.1	411.5	485.6	166.4	90	81.53	60.34	51.83	67.67	1485
132.5	56.49	83.55	309.6	433	576.8	407.4	426.8	361.1	338.4	334.9	351.2	363.8	396.7	434.4	465.8	456.2	426	385	339.3	315.7	315.6	311	298.7	273.9	272.1	230.9	314.7	529.7	234.1	104.4	78.91	67.35	55.55	48.97	300.4
241.1	118.3	128	313.8	441.2	626.2	474.9	388.8	338.6	372.8	388.3	330.1	390	397.5	431.6	413	467.8	387.4	363.8	329	310.8	309.3	292.4	307	279.3	258.5	236.3	249.3	483.7	318.9	120.3	85.61	74.01	60.38	45.9	82.1
383.2	107.5	62.71	307.9	413.5	441.6	415.3	387.2	382.9	321.5	337.4	335.5	368	385.2	408.4	426.9	430.5	406.7	381.2	324.9	305.2	311.1	298.9	303.4	289.7	271.5	246.8	219.3	394.4	432.9	152.1	90.99	80.22	61.75	49.85	48.81	655.3
1291	81.74	94.54	282.6	384.8	464.2	447.8	465.5	337.4	318.5	339.5	334.4	361.6	413.2	402.2	409.7	413.9	397.3	367	325.2	300.5	294.1	299.8	292.6	291.8	268.7	247.9	216	313.1	464.9	212.5	103.5	93.22	70.6	56.13	51.23	130.1
2192	13.51	130.1	221.2	337.2	455.7	465.2	396.9	333.2	383.7	367.7	307.2	380.2	390.1	391.4	417.4	376.2	382.2	366.2	321.6	298.6	301.2	320.3	299.7	296.3	263.4	251.9	216	249.1	442.6	284.5	126	96.14	77	72.28	50.89	53.3
3110	82.57	114.2	288.5	352.9	461.7	442.6	484.5	331.8	333.4	347.2	361.3	363	373.5	393.4	408.7	386.4	397.8	365.8	329.5	298.8	290	302.5	280.8	282.2	280.5	239.9	223	216.5	378.3	387.5	148.2	106.5	83.66	69.45	52.47	43.69	267.3
	339.8	91.39	261.9	280.9	441.8	517.8	383.9	373.4	355.5	337.7	377.2	351.1	369.2	385.6	357.5	377.8	380.6	349.3	333.6	300.7	294.1	292.8	290.9	271.5	275.7	245	218	205	297.8	429.6	186.6	116.6	86.72	72.73	57.63	42.33	79.22
	767.1	103	246.8	333.9	406.5	387.8	394.8	391.1	341.3	352.2	339.8	370.8	336.9	407.5	376.9	374.6	356.1	338.1	323	305	286.7	286.1	288.4	282.2	257	236.9	211.8	196.3	240.5	431.2	268.3	122.6	98.9	79.18	63.56	44.72	42.77	577.9
		114.2	288.6	380.4	458.7	471.8	380.6	359.6	325.7	348.2	330.2	329.7	360.9	350.7	367.7	382.9	347.8	346.6	302.8	293.3	290	305.5	283.3	276	266.8	242	223.9	210.7	203.5	369.9	339.8	147.7	99.49	78.94	62.75	50.63	40.17	116.5
		100.6	260.2	359.4	463	378.2	392.1	365.4	308.5	331.2	290.3	328.4	379.5	344.3	369.1	365	350.8	325.5	305.9	290.6	276.4	283.7	285	270.4	260.3	250.2	218.8	212.2	197.3	303	401.1	180.4	105	87.34	67.98	51.73	40.11	45.62
		166.2	227.9	283.3	382.6	386.7	415.2	351.5	328.3	281.4	349	348.1	382.4	353.9	358	360.3	351.1	343.8	303.9	284.8	278.6	293.6	265.3	258.7	253.1	235.3	227.2	207.6	190.7	238	396.1	235.5	118.1	89.53	73.37	50.85	35.71	30.85	223.9
		464.4	280.2	393.3	432.4	400.5	343.4	319.3	350.8	311.4	334.1	318.9	374.3	328.5	363.3	337.2	327.6	329	310.2	274.9	269.9	274.5	262.8	266.5	254.1	241.9	225.1	203.9	190.9	192.2	364.3	308.9	136.7	97.93	77.11	54.75	39.12	30.54	56.06
		1013	355.5	301.9	411.1	468.2	365.4	337.4	349.1	314	292.8	283.3	370.2	294.1	347.3	355.9	358.9	315.3	289.1	268.2	263.3	253.6	271.4	270.4	252.9	243.3	219.3	210.5	185.5	187.5	304.2	367.2	166	98.39	81.54	62.22	40.76	32.61	32.74	472.2
			169	392.2	389.8	434.8	351.5	323.7	336.9	330.7	331.9	324.8	335.3	308.9	351.5	343.2	350.4	305.1	302.4	264.1	264.6	263.1	259.5	259.3	240.9	233.2	229.2	211.3	186.8	181.4	240.5	384.7	217.3	105.9	90.4	64.08	47.97	31.49	25.67	91.88
			231.3	291.1	457.4	388	332.1	348.7	308.2	328.5	326	329.2	319.3	301.9	329.9	315.9	322.8	330.9	293.9	261.1	245.4	254.8	243.9	247.2	250.7	235.1	222.2	213.5	177.1	183.5	203.3	353.1	276.4	118.2	91.32	71.84	51.07	34.33	30.85	34.57
			275.5	373.3	347.7	356.1	369.5	312	357.3	326.4	329.1	296.9	304.7	331.2	331	322.8	328.7	306.8	269.3	251.3	250.8	244.3	247.1	236.1	226.1	224.2	218.7	205.3	197.8	177.9	190.5	285.8	328.4	148.6	92.22	69.51	53.04	37.13	29.46	25.71	214.4
			786.3	315.9	353.8	382	336.8	294	308.4	313.3	292.8	283.8	305.7	323.2	341.8	321.5	307.1	292.8	262.6	244.7	237.3	240.8	234.7	243.4	232.5	218.1	210.4	210.8	187.1	183.8	171.8	237.6	341.1	193.7	99.44	67.7	51.98	37.72	27.82	21.33	47.98
				279.1	344	466.4	345.1	305.3	348	319.9	306.6	290.1	335.5	322	274.2	340.9	310.5	291	265.8	236.7	230.2	234.5	229.9	235.2	221.6	234.5	203.9	207.9	180	180.2	181	194.2	326	245.6	102.7	78.79	51.75	41.21	27.64	24.62	21.79	470
				306.7	451.2	332.5	375.5	338	304.2	301	311.6	300.7	316.9	304.2	293.7	306.7	311.3	280.5	258.4	221.6	231.6	227.4	224.7	226.1	217.6	217.5	202.5	201.8	188.4	183.6	171.5	171.2	285	290.3	121.7	75.59	59.73	40.95	31.05	23.22	19.23	87.89
				284.9	355.9	284.8	304.8	311.9	284.1	284.9	307	321.4	274.8	306.6	337.7	324.9	303.4	269.1	255.4	229.3	205.7	214.1	208.5	218.2	210	210.6	215.7	198.8	191.2	178.6	175.4	170.1	230.5	315.1	160	76.78	60.43	42.63	30.66	23.67	16.94	30.49	950.1
				462.5	369.1	283.3	361.3	332.3	306.7	306.8	286.9	293.8	276.8	323.7	316.4	302	308.4	257.5	255.5	226.1	216	212.2	214.9	217.9	211.7	202.8	220.4	209.6	192.9	191.5	175.5	165.4	191.9	306.8	197	89.34	62.54	42.34	29.32	24.79	20.39	18.39	183.1
				911.3	354.4	336.3	320.7	316.5	348.5	332.8	292.5	293.2	307.8	292.2	282.4	312.7	291.5	260.8	236.1	214.1	214.2	212	214.3	221.9	207.7	200.8	194.2	199.6	188.3	191.2	179.4	169.1	165.7	263.4	236.1	100.7	66.09	48.09	36.27	27.07	23.02	17.96	38.43
					364.1	313.1	313.9	284.2	292.9	285.6	292.4	278	304.6	304.8	307.3	296.5	294.1	268.6	227	213.2	199.9	202.2	201	193.9	195.5	203.8	196.6	190.3	186.7	176.5	170.7	166.8	161.4	217.3	274.1	123.8	67.69	51.6	38.67	26.17	20.38	16.83	20.66	392.8
					353.2	307.3	346.4	285.5	283.5	276.3	311.2	276.5	314.2	294.6	295.8	295.7	273.5	256.7	233.6	217.1	199.2	204.9	204.2	185.8	201.7	199.2	197.8	196.8	190.9	173.7	164.6	164.9	157	184.4	271.8	157.4	69.51	51.96	36.72	27.29	21.33	15.8	14.96	72.02
					391	323.1	365	295.7	309.1	298.2	321	290.6	286.3	305.6	280.6	291.6	268.8	267.9	223.3	217.1	208.3	182.7	192.2	189.2	191.5	194.1	182.4	184	184.2	183	165.9	159	153.9	165.3	248.4	192.1	82	56.55	35.68	28.95	22.55	18.04	14.32	22.61	830.7
					521.1	253.8	381.8	313.1	292.4	248.7	311.2	263.7	289.9	298	301.9	262.6	286.6	242.2	225.7	215.3	190.2	181.4	181.3	181.3	193.7	186.5	190.1	174.7	185.8	178.2	169.8	161.9	158.4	144	204.5	229.5	102.8	53.54	43.13	29.01	24.14	17.33	12.63	16.29	157.1
						252.4	357.6	316.3	340	283.2	291.8	258.8	278.1	302.3	314.1	248.4	265	259.1	227.8	207.7	191.8	165.5	185	189.6	191.1	175.6	175.1	179.4	181.1	175.4	168.9	166.5	153.1	137.8	167.3	227.6	126.1	53.1	40.31	29.01	23.81	18.84	15.33	12.87	34.45
						363.5	330.2	251.4	279.2	273.5	298.7	296.1	267.5	268.6	306.4	279	244.6	221.2	192.8	191.6	176.3	173.6	185.7	173.1	166.9	178.3	171.7	178.8	174.2	175	173.2	165.4	152.8	129.3	139.6	214	158.1	64.05	36.81	28.92	22.21	16.58	15.37	12.6	15.94	368.2
						247.5	330.5	247.4	268.3	289.1	283.9	286.7	301.1	270.2	274.9	284.3	263.5	247.4	207.5	188.4	166	172.8	162.3	165.9	165.9	171.6	170.7	173.2	168.6	169.8	169.7	157	155.3	136.5	125.4	180	184	81.73	44.81	29.69	23.96	18.18	13.54	12.35	12.3	66.55
						334.8	332.8	263	291	277.6	296.9	258.6	274.3	279.7	281.5	255.8	247.5	214.8	206.8	175.9	162.9	170.2	158.5	160.9	168.9	163.8	172.9	173.7	162.1	161.4	163.9	159.4	156.8	126.6	112.5	152.1	189.9	104.8	44.38	27.02	24.24	17.67	13.72	11.45	9.277	19.73	817.3
							255.8	286.1	295.1	284.4	312	263.3	253.2	269.8	260.7	264.6	264	211.3	206.9	182.9	157.1	169.1	157.7	154.1	157.4	166.8	165.7	163.8	157.4	160.1	164.6	150.9	149.2	126.7	113.4	121.5	192.4	123	51.62	34.25	22.64	18.16	15.04	11.04	8.667	9.779	155.7
							317.1	270.7	285.4	296.6	259.1	272.6	235.4	248.6	283.9	250.1	242.2	201	181.5	175.7	167.6	166.5	151.4	155.8	149.3	165.7	150.3	157.9	158.1	154.9	163.3	149.3	146	136.4	117.5	106.7	154	140	64.04	31.38	24.45	17.96	15.79	11.61	10.87	9.395	31.06	1542
							281.2	257.8	282.9	263.9	256.5	260.3	237.6	275.6	277	256.2	240.9	224	182.4	183.4	148.8	148.2	141.3	148.2	148.5	144.5	158.8	168.4	150.9	144.1	157.5	145.3	136.2	133.9	109.8	100.4	131.1	158.3	72.34	33.76	27.34	17.97	12.82	9.367	9.26	8.503	13.09	346.5
							238.4	270.1	271.3	242.5	250.2	240.5	238	242.4	246.9	236.2	234.6	210.6	188.6	161.4	151.3	133.6	136.4	133.2	141.5	144.2	157.8	149.9	148.1	148.7	152.7	153.1	140.9	128.6	111.9	93.69	106.1	150.2	91.48	33.88	24.68	19.45	14.33	11.79	10.26	6.047	9.653	59.96	2597
							301.8	294.4	296.3	251.7	281.6	265.7	250.5	234.6	245	242.4	234.5	206.1	184.6	162.1	133.8	133.3	126.8	131.9	148.5	142.3	148	142.2	140.2	139.4	145.8	146.5	137.6	126	104.1	95.51	91.35	135.5	114.5	43.7	26.53	21.43	15.11	10.76	9.499	7.245	7.993	16.66	750.6
							585.3	258.9	260.9	278.8	235.2	243	258	246.4	247.3	233.5	214.6	210	162.9	144.9	137.1	140.7	131.6	123.1	127.4	130.9	144.1	137.3	132.4	145.6	143.7	136.6	130.6	127.5	110.5	91.96	83.72	116	135.1	53.7	27.84	21.1	16.7	12.9	9.594	6.396	7.892	10.17	140.1
								280	252.2	238.5	289.3	249.1	252.5	245.8	230.2	245.2	204.5	184.1	155.3	139	124.4	127.2	128.7	122.7	119.8	129	129.2	141.8	130	144	137.5	134.1	134.4	121.8	109.5	85.61	76.97	91.56	130.5	71.17	30.59	23.05	18.72	13.07	9.717	6.311	7.781	7.113	30.87
								258.3	236.4	239.3	236.3	246.9	217	223.4	234.1	229.2	194.5	184.3	147.2	144	124.7	125.4	121.3	127	116	122.4	129.7	130.6	127.2	139.8	134.6	132.9	130.2	116.2	103.1	89.8	68.92	76.63	123.4	89.99	35.96	21.83	17.15	13.29	10.18	6.827	7.265	5.999	12.81
								225.8	235.7	265.6	220.1	247.9	211.7	235.4	226.9	216.2	192.4	184.4	158	119.7	129.9	119.2	116.9	113	114.5	108.9	120.7	130.8	128.1	121.8	132.7	125.7	126.5	113.2	104.4	89.81	67.72	59.79	103.9	106.9	41.41	20.46	15.2	10.74	8.983	7.75	6.81	7.053	8.465
								290.8	261.9	240.1	247.5	218.4	218.7	216.5	220.6	216.2	186.1	159.2	155.6	128.5	116.3	119	114	112.4	112	109.2	118.9	112.4	118.8	128.8	122.3	119.6	121.4	108.7	100.2	84.38	71.12	64.51	75.23	107.7	55.7	24.54	15.42	13.47	8.569	6.954	7.01	6.337	6.497
								473.2	265	233.4	221.9	216.8	223.9	220.8	224.6	204.3	194.1	162.1	149.1	128.1	122.7	109.1	110.9	113	108.9	110.6	111.6	111.4	112.4	122.1	122.3	115.6	114.2	111.1	98.22	80.23	71.74	58.95	62.3	105.4	68.37	28.31	20.15	12.03	11.09	8.909	7.655	6.589	5.143
									227.9	201	202.6	237	195.6	206.1	212	183.6	179.9	163.6	133.5	131.5	112.6	96.08	105.8	104.5	103.6	101.5	108.1	109.7	114	116.3	118	119.7	109.3	107.8	99.44	79.73	67.96	57.86	52.87	89.96	82.97	29.12	17.67	12.47	11.43	9.426	6.986	7.121	7.083
									246.6	220.7	216.7	221.6	182.8	192.7	213.1	171.3	171.5	149.1	138.2	113.4	109.2	104.1	98.13	97.23	100.3	108.6	102.2	104.1	103.1	102.8	114	114.8	103.8	99.75	93.49	81.23	67.34	52.82	49.09	71.74	86.42	37.46	18.17	12.5	10.46	8.868	7.723	7.269	4.879
									224.1	217.5	219.1	220.8	193.6	212.3	191.4	167.3	166.9	144.6	128.5	114.9	97.44	94.78	89.67	103.4	90.41	92.3	98.99	103.5	101.5	107.3	106.6	107.3	107.1	95.26	91.17	73.45	65.64	50.54	44.62	57.13	98.38	55.66	20.09	13.3	10.37	8.5	7.673	6.333	5.154
									232.2	241.6	224	220.8	203.5	196.9	191.3	168.6	157.8	133.6	130.9	120.3	90.86	94.08	96.77	84.52	90.64	96.91	88.07	101	95.19	103.1	104.6	100.2	101.3	101.2	87.68	73.48	63.12	51.3	44.13	43.1	82.28	63.08	23.01	15.17	11.48	7.491	8.835	6.745	6.251
									459.3	197.9	193.5	196.3	187.8	178.6	184.7	178.9	157.2	125.7	112.9	103.6	87.95	84.89	93.92	81.89	86.24	91.57	89.63	94.66	99.25	96.21	101.5	96.71	100.6	99.11	85.06	74.06	63.75	52.1	42.49	34.65	64.61	79.72	29.49	14.68	10.85	8.674	7.351	7.367	6.596
										160.7	209.8	187.3	173	165.7	183.2	154.5	135.1	125.9	118.2	95.37	89.36	97.12	85.82	82.61	78.64	86.21	88.72	89.26	85.64	92.97	99.98	94.54	95.93	87.37	84.82	70.38	57.18	52.63	39.24	33.7	52.01	77.88	43.54	17.64	11.39	10.02	6.657	6.371	6.015
										208.6	206.3	198.5	197.2	191.5	162.9	160.8	141.5	133.6	112.9	101.3	84.87	83.5	82.26	84.46	77.44	90.51	82.25	82.45	86.52	98.5	90.91	89.35	89.15	81.05	83.26	69.92	54.2	46.81	34.79	35.18	38.47	68.14	49.87	18.89	12.4	9.935	6.937	6.962	6.61
										201.1	185.3	196.3	181	179.9	162.4	177.7	132.6	118.8	105.2	88.65	78.21	73.4	72.64	72.7	72.79	83.94	75.32	80.98	84.94	90.5	84.67	85.33	88.36	83.98	80.43	72.13	55.08	46.3	36.93	34.46	31.74	61.2	63.59	22.83	11.81	11.55	8.827	7.446	6.907
										209.5	197.8	169.7	150.1	173	154	166.1	134	117.4	102.3	85.77	82.34	73.11	74.14	69.99	67.19	73.13	78.32	75.37	76.22	87.19	86.11	82.99	89.11	79	69.59	62.9	59.97	47.1	39.8	32.95	29.76	49.67	66.01	28.99	13.32	10.87	9.147	7.201	5.985
											201.7	160	161.8	167.8	161.1	153.4	132.1	104.6	100.6	84.53	75.34	68.15	80.19	69.37	72.37	65.09	79.41	79.15	71.93	77.18	81.33	82.9	71.99	78.44	69.56	61.81	52.72	48.02	37.03	33.91	25.69	35.58	64.72	40.83	14.19	10.89	10.17	8.595	6.565
											181.1	186.8	164.4	171	153.5	140.2	140.6	109.2	94.37	78.52	81.25	69.29	71.53	62.42	64.09	56.92	65.34	70.18	80.29	64.94	75.51	72.94	74.22	72.54	68.19	58.44	45.65	45.16	38.21	31.45	24.82	28.43	56.55	47.91	19.93	12.31	8.957	7.444	7.076
											163.9	178.5	163.9	169.8	154.6	137.4	122.4	121.4	81.87	79.29	68.22	62.26	64.61	63.17	60.63	60.81	60.9	60.49	69.7	72.56	73.64	78.47	77.05	64.61	64.89	60.38	42.79	43.25	34.81	32.17	26.73	24.77	42.56	55.41	27.1	11.57	8.262	8.849	8.272
											167.1	192	178.1	152.7	146.3	130.5	120.1	104.9	92.45	81.15	71.38	61.71	63.17	60.95	54.15	55.98	62.51	60.82	66.02	67.46	69.35	72.1	65.72	72.08	65.24	58.15	46.47	39.9	36.96	29.45	24.67	20.92	33.05	58.01	30.11	13.44	11.03	10.72	7.659
											232.6	187.4	165.9	166.4	149	140.8	112.7	105.9	83.85	77.24	64.32	61.41	61.91	59.9	59.27	55.45	68.67	64.8	66.57	69.58	68.25	67.84	71.45	65.23	60.93	59.99	46.35	38.21	35.12	29.19	23.26	21.3	26.75	52.46	37.88	14.29	10.16	9.151	7.948
											323.8	178.2	160.6	150.4	157	138.7	112.1	104.3	72.57	72.21	60.45	58.06	56.65	58.67	54.73	55.13	60.63	56.97	58.07	60.87	67.94	69.57	67.21	60.92	57.77	55.11	49.46	35.52	34.05	27.15	23.44	24.49	22.43	41.85	49.07	18.56	11.75	10.29	7.671
												133.8	172	173.7	149.8	127.8	115.3	98.19	85.91	64.61	61.06	56.52	52.32	54.17	57.35	56.41	55.65	63.31	54.52	60.74	62.08	70.86	66.3	60.65	57.87	50.37	44.78	39.47	33.43	27.43	25.11	22.86	20.79	34.14	49.91	23.19	10.66	9.219	7.536
												163.4	187.3	139.6	140.5	124.1	100.8	91.26	76.17	63.52	58.67	45.98	52.77	46.27	49.87	55.27	54.92	56.39	56.34	55.21	62.54	61.64	59.22	54.9	49.11	45.33	46.48	37.96	31.92	26.23	25.61	22.15	18.42	28.09	50.21	30.17	13.42	9.99	7.975
												165.2	172.3	139.2	140.8	121.5	97.69	90.43	74.24	65.57	56.86	54.33	55.63	53.98	49.56	47.98	54.87	49.51	50.97	59.12	57.13	57.5	59.64	47.24	52.22	47.84	42.12	36.93	30.2	26.13	24.1	20.51	20.49	22.73	41.18	38.23	16.64	10.82	8.982
												174.9	162	141.3	133.1	127.8	105.3	86.26	66.89	64.07	53.57	51.63	46.52	48.79	50.77	47.06	57.77	50.15	53.61	55.24	50.27	59.55	51.74	47.02	50.29	45.49	42.4	35.09	34.06	24.91	24.47	20.27	19.28	17.93	31.89	46.41	21.46	11.67	8.333
												288.2	148.8	134	132.9	115.6	104.2	69.74	71.25	61.12	52.22	44.75	48.46	46.02	43.52	42.55	49.63	47.54	48.91	54.39	46.94	53.09	51.16	51.18	47.02	40.35	38.94	32.16	30.5	25.53	24.03	18.27	16.41	18.7	24.26	43.34	28.42	9.827	7.985
													170	137.8	129.6	105.2	101.1	79.57	77.04	56.11	40.84	46.2	44.86	47.07	38.84	45.95	45.6	44.22	53.59	49.24	47.86	49.75	56.72	56.14	47.88	41.85	39.52	34.11	29.83	26.83	21.82	22.37	17.93	16.1	18.79	38.39	30.55	12.55	8.35
													157	154.5	129.1	109.8	101.3	77.93	66.08	51.98	47.63	42.69	44.55	38.85	41.58	42.15	38.01	41.43	50.43	49.21	47.89	43.94	50.44	48.66	43.33	39.3	33.53	31.33	26.04	25.17	21.63	20.98	18.89	15.8	16.5	31.38	33.17	18.74	9.91
													165	133.5	130.5	106	87.64	76.75	63.8	55.78	46.11	37.49	45.8	39.22	39.64	40.97	39.84	45.25	43.31	46.48	41.84	48.01	49.37	46.75	45.66	36.63	32.82	30.41	27.87	22.27	20.95	18.88	19.43	14.02	14.03	26.02	37.6	22.38	11.66
													157.1	122.6	118.7	113.4	90.99	70.43	63.99	47.45	49.53	39.52	39.37	39.69	36.87	37.29	38.3	42.27	37.16	38.7	42.95	43.82	49.63	48.25	38.29	39.96	32.16	32.24	25.98	22.42	20.22	20.27	16.97	14.51	13.88	19.12	36.46	26.82	11.8
													221.9	132.4	118.4	107.3	85.19	69.49	54.91	44.48	44.96	39.5	42.16	41.95	37.43	37.45	38.13	41.52	41.24	45.01	38.77	42.44	42.67	41.94	39.86	33.15	31.06	27.65	26.74	20.41	21.22	16.55	16.24	15.2	13.51	16.35	32.62	29.47	15.22
													706.6	141.2	120.7	98.09	80.55	67.23	47.95	44.11	45.97	37.98	38.7	31.15	36.61	38.62	38.82	36.42	36.37	40.52	38.44	41.17	39.7	39.59	40.05	34.47	29.01	26.5	25.37	22.97	19.8	17.33	15.72	14.93	14.08	14.59	26.51	35.1	18.25
													2340	141.6	133.6	100.9	84.66	58.36	50.92	39.22	41.65	37.19	39.57	32.21	33.55	34.11	36.16	33.09	33.31	38.35	39.02	37.79	37.79	35.58	35.91	29.66	29.97	24.65	22.6	22.5	20.38	17.35	15.98	13.51	13.59	13.34	20.45	33.83	21.71
														132.1	103.2	93.84	81.03	59.43	47.24	38.5	38.01	36.39	35.17	28.96	29.12	32.52	36.17	35.88	35.42	33.59	35.15	37.92	36.75	36.33	31.79	27.53	26.43	24.07	23.61	18.51	18.45	16.08	13.2	14.42	13.93	13.51	17.68	29.29	27.97
														142.6	103.2	92.01	78.42	58.14	54.1	43.17	42.08	35.96	35.93	31.36	31.8	28.94	31.42	34.45	30.45	33.28	36.91	38.08	32.92	35.57	31.82	29.88	24.97	22.77	22	19.51	17.6	17.59	15.06	16.41	12.52	12.11	13.14	27.04	28.76
														237	112.4	98.43	75.99	61.74	49.65	38.45	29.8	31.91	31.29	27.98	27.96	31.48	31.54	34.54	30.52	30.31	32.77	33.45	32.99	32.14	33.2	27.07	29.25	21.34	20.02	17.89	16.21	16.98	14.26	15.56	12.58	13.44	11.82	20.4	29.01
															105.7	89.66	72.31	48.51	42.04	34.88	30.87	33.3	26.58	28.92	25.15	27.91	34.1	31.11	29.96	31.02	30.69	32.25	34.92	29.1	29.67	29.7	21.88	23.21	22.17	16.55	18.3	13.88	13.9	14.17	13.82	13.32	9.784	15.94	25.08
															109.6	89.75	74.78	50.43	37.72	33.07	27.49	31.2	28.48	27.77	26.9	25.54	31.67	30.03	30.15	29.23	29.39	32.62	32.2	29.51	28.14	29.11	24.4	21.33	18.24	17.46	19.42	13.64	13.05	11.61	13.85	12.13	11.62	11.41	22.66
															129.4	81.22	58.68	54.91	39.86	36.53	23.68	28.2	29.12	28.21	22.3	23.21	30.22	27.61	28.2	29.46	30.3	30.47	29.37	29.98	28.92	27.14	20.8	19.64	20.09	19.71	16.51	15.74	13.63	13.61	10.53	11.12	11.68	9.898	18.63
															113.1	80.99	59.86	45.6	29.81	33	28.6	28.68	23.31	21.34	21.93	24.83	26.3	27.63	28.62	31.46	29.11	27.91	27.21	28.15	23.52	22.6	22.27	19.17	19.08	16.87	13.83	11.69	12.14	12.51	11.7	11.85	10.25	10.76	15.38
															158.7	91.29	55.74	49.95	30.56	33.5	27.72	29.35	27.2	20.99	23.76	28.22	22.83	28.35	29.74	29.65	24.97	29.09	27.05	29.58	24.37	23.68	20.52	18.6	17.79	15.97	13.24	12.14	12.61	10.3	10.97	10.2	9.678	8.809	11.71
															506	75.87	58.1	37.82	34.48	29.63	24.75	23.93	24.12	21.17	25.77	24.92	24.93	22.88	25.98	24.84	24.5	23.08	25.77	25.45	23.54	20.79	18.97	17.97	18.11	14.55	13.26	11.76	11.46	12.87	11.85	8.948	8.304	8.757	9.213
															1466	79.59	57.49	45.04	34.59	28.53	22.33	24.23	22.95	18.32	22.45	25.75	22.98	23.77	24.41	24.04	21.21	24.88	21.6	23.1	24.41	20.7	17.62	16.18	16.06	11.91	12.68	12.09	10.88	10.65	10.42	8.942	9.167	11.44	8.324
															3292	80.17	54.55	40.42	36.41	27.9	24.36	26.4	23.21	20.66	21.31	24.26	21.68	24.22	22.94	24.86	23.6	23.62	23.86	21.32	20.1	21.65	18.72	14.53	13.49	15.12	14	10.86	9.68	9.69	9.674	12.05	9.78	7.576	8.205
																81.24	47.12	40.51	37.15	29.64	21.49	26.77	19.4	18.62	19.18	20.81	21.63	21.93	24.91	22.41	22.46	21.1	19.48	23.48	21.29	20.61	17.26	15.04	11.49	13.77	12.53	10.64	11.97	11.34	9.115	10.43	8.809	9.212	8.597
																144.2	64.01	47.69	29.4	26.89	20.19	22.75	20.66	19.1	18.48	19.95	23.28	19.54	18.7	20.37	19.99	19.32	20.35	17.97	20.1	17.46	17.43	16.26	12.66	12.67	11.57	12.22	9.948	10.42	9.545	8.895	10.16	8.257	7.603
																388.6	54.18	44.62	32.32	21.39	22.06	23.25	17.81	17.91	15.95	15.53	18.85	21.72	23.54	16.55	22.32	16.37	20.06	18.13	19.53	15.27	18.27	15.24	13.14	12.24	14.49	10.23	9.853	9.879	9.29	10.35	9.112	8.106	7.5
																1054	51.72	42.02	29.14	23.54	19.96	23.5	21	16.02	16.04	19.2	19.03	18.99	17.56	16.76	20.88	17.51	21.28	21.22	19.26	15.45	15.98	12.71	12.35	11.25	11.72	9.454	9.795	7.925	8.554	9.577	7.465	8.017	7.22
																2407	54.99	32.9	33.86	22.14	20.49	18.46	18.14	15.65	16.19	19.01	18.65	16.83	19.68	18.94	20.65	16.99	18.9	16.17	17.93	17.76	14.05	12.72	11.04	11.49	10.44	10.02	9.029	9.576	10.28	7.43	8.515	6.788	6.79
																4439	63.59	36.97	31.54	24.35	18.43	18.41	16.28	15.61	16.04	16.01	16.95	18.39	16.42	17.24	17.68	18.51	21.75	17.2	17.22	16.27	13.14	13.5	11.2	9.391	11.2	9.889	8.299	7.62	8.206	8.231	6.688	6.394	5.874
																	95.49	35.7	26.46	19.08	17.31	16.04	13.01	13.42	11.56	16.33	18.86	15.26	17.34	17.17	15.79	16.23	18.54	14.77	15.6	14.61	12.34	11.92	10.42	10.76	11.32	9.915	7.692	9.013	9.128	8.319	5.824	6.15	6.233
																	262.7	37.28	26.94	20.7	15.74	13.85	15.44	13.45	13.9	17.95	15.65	17.16	16.78	15.12	13.34	13.43	18.44	15.43	16.48	13.78	10.19	12.38	10.44	9.759	8.982	8.125	9.407	6.816	6.917	7.583	6.191	5.201	4.518
																	768.5	36.4	23.8	15.74	21.64	17.39	16.39	16.6	13.2	16.89	11.85	17.48	15.52	15.36	15.5	15.49	14.62	13.73	13.89	12.26	9.981	11.71	9.642	9.225	10.68	7.398	7.225	8.639	6.528	6.862	5.848	6.622	6.055
																		42.21	25.44	17.78	17.24	16.7	17.05	12.87	13.15	16.94	14.61	14.76	13.28	11.13	16.71	15.77	14.7	13.31	14.53	11.51	11.17	10.6	9.752	9.009	9.442	7.606	7.305	7.949	8.837	5.991	6.058	5.119	5.984
																		36.51	25.8	17.07	18.08	14.3	13.81	15.24	11.84	15.22	14.16	12.83	13.3	11.85	12.85	13.05	13.19	14.75	14.78	11.65	10.98	9.785	9.064	8.803	7.882	8.535	6.175	8.195	8.752	6.135	5.059	6.88	5.851
																		69.39	25.34	21.64	16.39	16.23	18.39	13.9	13.21	13.26	12.4	9.004	13.95	11.95	12.99	13.05	15.47	13.94	12.12	12.28	9.813	9.582	7.675	7.641	7.359	8.193	7.452	6.484	6.696	5.339	5.641	4.868	5.105
																		215.2	26.87	21.61	15.71	15.34	13.15	11.92	12.92	13.93	10.21	9.321	13.6	12.13	13.15	12.08	11.4	11.25	10.7	11.33	8.844	7.842	8.431	6.497	7.477	7.324	7.729	5.179	5.577	6.585	5.253	3.959	4.123
																		613.6	21.44	20.89	16.07	16.63	13.2	12.79	12.75	13.03	9.107	10.19	12.06	11.59	12.05	15.58	11.9	10.92	12.47	10.29	10.14	8.854	10.34	7.135	6.374	8.564	5.43	7.333	5.165	5.761	4.734	5.277	5.11
																		1394	25.84	14.11	17.33	13.01	11.18	11.63	8.353	12.51	10.2	10.94	10.98	11.88	12.03	12.04	13.04	12.05	10.39	10.31	9.488	8.533	7.58	6.247	7.433	7.069	5.103	6.95	4.127	5.585	4.389	4.122	4.496
																		2535	33.11	14.22	12.33	11.25	11.56	9.944	9.07	10.89	9.117	12.13	11.6	8.333	10.14	10.92	11.02	10.23	8.798	8.359	8.295	7.877	6.505	6.473	5.956	5.258	5.372	5.426	5.298	6.869	4.606	5.459	4.576
																			67.15	15.84	13.17	15.46	12.77	9.651	9.272	9.029	8.751	11.37	9.959	8.58	10.57	9.197	11.59	10.95	7.895	8.176	8.579	6.42	7.32	7.249	5.247	6.465	6.416	5.311	4.693	4.669	4.161	4.629	4.095
																			197.9	18.79	10.83	13.77	11.55	12.02	9.17	10.46	9.116	10.97	8.49	8.559	10.88	10.24	9.994	10.19	11.51	7.619	7.457	6.854	5.41	5.295	4.778	5.196	5.649	4.662	3.641	3.859	3.693	4.092	4.037
																			503.3	17.34	14.46	9.551	9.022	9.831	7.083	10.91	8.478	7.639	6.717	11.07	8.127	9.047	9.42	9.198	10.09	8.108	9.114	6.87	4.82	4.999	4.418	5.199	4.507	4.769	5.032	3.523	4.966	4.245	3.249
																			1137	23.68	15.4	10.73	8.226	10.99	8.06	9.513	11.36	9.06	6.406	9.523	8.045	8.762	7.563	8.997	9.091	7.779	7.108	5.562	5.235	5.163	4.526	5.436	3.267	4.59	4.676	2.393	3.689	4.24	3.389
																			2170	19.85	14.01	10.4	7.891	8.922	7.2	9.226	8.195	8.445	7.648	9.847	6.977	7.704	9.873	8.558	7.898	6.422	5.923	4.909	5.196	5.488	4.432	4.327	4.61	5.092	4.769	3.253	3.732	3.761	3.544
																				48.18	15.18	11.52	9.532	9.972	6.225	7.242	8.362	8.098	9.578	8.397	6.32	6.581	5.938	8.365	5.993	6.798	5.315	6.359	4.737	4.906	5.293	4.275	3.812	3.543	4.241	4.355	2.986	4.027	2.994
																				155.4	15.33	10.9	9.422	8.09	9.223	9.492	5.875	7.513	8.55	7.158	7.24	6.565	6.697	8.01	5.085	5.513	4.681	5.166	5.325	5.089	4.286	4.52	3.912	4.08	4.82	3.577	3.3	3.935	2.525
																				390.3	14.46	9.418	11.95	8.301	8.019	9.401	8.485	9.147	5.469	6.756	6.873	5.557	5.568	8.388	6.432	5.396	5.57	4.681	4.845	5.65	5.238	4.648	3.085	3.28	4.583	4.133	3.309	2.545	3.432
																					14.76	12.11	9.871	9.031	8.051	9.028	6.674	7.93	6.481	6.704	6.344	8.801	6.804	6.392	8.728	6.282	5.476	4.408	4.458	3.493	5.059	4.458	4.092	3.603	3.657	3.249	2.457	1.892	2.009
																					21.03	9.349	10.15	9.781	6.961	7.802	7.306	6.237	7.307	5.347	8.051	6.581	7.439	5.699	4.979	5.467	4.315	5.684	3.473	4.148	3.3	3.679	3.191	3.935	3.477	3.201	3.222	1.834	2.621
																					43.26	10.49	8.436	8.045	9.411	6.41	5.859	7.678	7.638	7.56	5.341	5.682	4.635	6.243	5.464	4.352	5.058	5.097	3.065	4.441	3.908	3.679	3.135	3.275	2.27	3.188	1.886	2.528	2.212
																					127.1	10.72	8.273	8.641	7.786	6.124	6.219	7.6	4.946	6.444	4.488	5.588	5.193	6.281	5.483	5.829	3.883	4.73	3.314	4.284	3.237	3.6	3.23	3.07	2.194	3.472	1.972	2.867	2.876
																					340.7	11.73	9.457	7.281	6.505	7.407	5.513	6.681	5.68	5.134	6.313	5.54	6.719	5.656	4.134	5.729	4.385	4.936	3.614	3.795	3.248	3.121	3.405	3.745	2.772	3.387	2.509	2.266	3.356
[truncated: 1 more columns]
