# Supplementary material for: Utilization and transformation of Chrysotila dentata-derived dissolved organic matter by phycosphere bacteria Marinobacter hydrocarbonoclasticus and Bacillus firmus
Source: PeerJ. 2024 Jan 4;12:e16552. doi: 10.7717/peerj.16552 (PMC10771764; doi:10.7717/peerj.16552)
Supplement: Supplemental Information 11 [file peerj-12-16552-s011.xlsx]

## Sheet: Sheet1
-1.119	24.19	135.1	57.92	695.9
9.825	37.39	106.3	169.6	189.5
42.55	37.83	26.45	211.3	229.9
86.04	21.8	61.66	185.7	245.6
67.66	11.98	107.5	190.7	411.6	251.9
33.6	61.38	69.72	111.6	447.2	299.6
110.9	24.59	38.76	112.6	498.8	439.8	441.7
38.32	62.47	64.7	83.8	359.2	593.4	198.5
53.9	78.39	178.9	101.9	142.5	648.7	356.4
22.9	54.56	98.99	47.66	50.69	638.2	506.5	297
64.36	45.85	102.7	53.53	85.44	380.5	743.6	239.8
72.77	53.2	91.99	90.05	37.17	198	835.8	391.3	514.8
87.6	84.33	104.2	80.38	66.7	121.4	672.6	709.3	203.2
60.85	139.1	57.03	141.3	63.1	78.77	476.4	935.6	233.7
103.6	90.73	84.24	144.4	44.56	56.86	249.1	967.9	401.8	282.3
69.76	57.54	109.8	105	35.95	47.6	131	817	772.4	154.2
52	156.2	84.94	67.55	71.5	77.87	93.13	516.3	989.5	261.4
58.02	184.4	53.46	40.25	90.85	47.18	72.57	260.5	1034	520.5	183.6
164	206.4	54.02	49.8	74.38	84.37	100.8	107.8	780.7	889.7	130.5
152.1	147	19.52	112.7	126.5	79.3	72.26	101.1	519	1089	239.6	288.9
121.8	90.46	77.79	99.33	133.4	113.5	58.23	67.06	224.4	1101	535.3	138.7
165.8	95.84	118	98.25	156.7	121.6	68.19	66.33	109.5	832.9	954.5	163.1	633.6
69.9	118.1	178.5	164	98.38	152.9	94.13	42.78	57.47	463	1262	300.2	204
113.1	103.3	160.3	226.1	298.8	252.4	129.3	57.35	59.7	232.1	1249	649.9	156.9
59.57	124.9	223.4	176.4	510.4	224.1	101.3	67.85	51	108	965.6	1101	195.4
97.49	81.71	208.2	331	487.8	312.9	117	82.59	68.42	70.68	571	1465	411.1	224.5
65.55	45.64	122.9	389.6	455.8	552.3	162.5	91.89	65.42	86.46	278.1	1465	789.4	219.7
103.6	193.5	208.5	526.6	570.3	490.7	193.1	117	53.6	85.79	150.5	1122	1292	309.2	403.4
134.3	86.49	154.5	435.7	704.9	528.5	289.5	123.5	70.59	69.99	131	698.4	1764	559.2	365.1
128.4	124	170.5	539.9	1022	758.7	376.2	135.1	77.67	100.2	147.2	383	1833	1032	466.6
179.4	88.9	147	484.3	735.9	906.4	507	171.6	120.4	123.1	150.4	297.5	1398	1611	560.3	559.7
297.9	133.9	261.4	581.8	870.3	813.2	577.2	240.2	138.9	159.2	198.4	284.9	952.8	2166	865.8	574.9
53.69	136.5	214.2	470.8	888.1	952.4	617.9	320	203.2	170.8	186.1	310.9	660.1	2175	1353	658	538.1
185.9	86.64	325.7	662.9	959.8	1035	643.5	364.2	190.4	245.7	267.9	385.7	584.4	1854	2008	804.1	526
193.7	144.8	215.3	694	963.8	1238	660.8	323.1	217	269.8	303.2	397.9	568.1	1350	2583	1055	555.4	473.1
116.3	135.5	320.4	626.2	1036	1084	726.2	392.3	239.3	268.2	358.9	459.3	600.4	1054	2666	1484	654.1	376.9
165.5	145.3	236.3	568.7	1011	1064	830.4	422.6	277.6	255.1	374.5	474.3	647.3	947.1	2264	2138	750	371.4	557
111	123	253.8	626.8	882.7	1276	791.6	402.9	344.5	273.2	427	506.8	715.1	923.6	1671	2574	960.5	407.9	256.1
181.9	144.4	189.1	730.7	1012	1146	875.3	461.5	325.8	290.6	410.8	549.5	767.9	910.5	1322	2666	1349	423.8	236.5	862.6
160.6	152.6	258	511	1047	925.7	826.5	415	339.4	310.6	473.9	599.7	761.2	990.8	1159	2275	1877	469.5	207.3	233.5
194.8	187.5	239.8	650.6	1008	975.8	869.3	453.2	340.3	331.3	514.8	672.9	862.3	1024	1180	1740	2311	637	232.2	140.6
189	170.1	281.4	721.5	1135	968.3	718.1	535.3	345.6	415.7	538.8	727.5	909.6	1099	1172	1376	2337	1031	257.5	132.4	351.6
120.1	131.1	218	713.9	1119	905.2	823.8	484.4	360.7	463.5	522.1	718.2	953.8	1104	1243	1247	2048	1464	295.6	151.8	140.2
303.5	119.5	147.9	553.4	1175	1023	791.9	540.9	388.5	448.7	619.1	802.7	993.8	1123	1278	1197	1609	1873	495.5	156.4	112.5	699.7
111.1	110.7	219.9	568.6	1280	1107	733.5	524.9	445.8	454.9	643.6	846.7	1005	1197	1358	1225	1207	1988	781.8	188.7	103.4	178.9
247.8	40.66	297.1	799.9	1531	1204	777.1	536.3	472.3	493.8	656.6	892.3	1149	1255	1374	1300	1113	1735	1202	230.3	115	105.2	1469
125.6	141.3	179.9	787.7	1354	1287	779.2	581.6	414.4	494.3	673.2	905.7	1107	1338	1396	1343	1046	1314	1609	340.4	129	84.89	310
133.1	159.7	226.4	803.9	1508	1486	837.4	552.2	424.8	538.4	696.6	930	1090	1343	1398	1339	1047	991.4	1676	578.6	140.7	100.1	118.2
85.75	118.9	257.5	804.3	1720	1316	770.1	574.6	455.5	552.1	698.5	872.9	1160	1343	1428	1313	1064	796.6	1453	922.7	185.9	100.8	85.19
135.1	133.5	255.3	763.8	1487	1425	869.8	591.6	512.9	550.1	726.2	940.4	1113	1317	1428	1349	1066	749.4	1069	1234	266.3	102.9	83.35	160.6
220.6	81.18	247	1014	1695	1311	870.9	565.4	486.9	494.6	733.1	964.1	1151	1372	1371	1344	1048	755.2	760	1326	451.5	109	80.17	83.26
142.4	52.71	218.7	846.2	1688	1320	893.2	604.7	491.2	552.5	717.9	941.7	1099	1271	1411	1346	1027	765.9	620.6	1152	775.8	129.7	82.91	73.97
159	200.5	147.5	582.9	1419	1320	858.6	567.8	474.6	511	718.1	899.1	1106	1256	1392	1271	1048	831.8	549.1	838.7	1066	209.8	92.11	73.14	99.89
139.5	92.3	287.8	819	1353	1345	847.1	552.3	551.2	519.2	633.9	857.7	1088	1283	1298	1320	1046	786.7	549.4	564.8	1126	359.2	99.14	84.56	78.71
103.9	217.5	208.5	893.2	1521	1108	924	564.3	514.8	565	651.3	854.8	1022	1213	1272	1302	1012	760.8	533.3	421.7	974.2	622.5	131.1	85.81	72.42
106.3	155.9	129	640.7	1444	1302	785	537.8	475.3	523.4	588.4	809.8	974.5	1163	1318	1233	1027	752.6	516	340.1	727.7	854.7	176.8	93.6	82.72
109.9	97.1	211	503	1274	1288	841.5	599.6	524.6	469	634.3	785.4	934.8	1099	1227	1163	942.9	766.3	501.2	334.7	467.8	979.6	311.2	97.37	83.74	68.05	259.9
208.3	199.4	167	603.7	1311	1131	704.4	535.3	458.3	484.2	596.4	733.9	914.8	1069	1151	1066	952.5	685.3	522.4	320.6	333	877.9	527.4	127.1	90.51	76.34	96.04
183.8	120.8	225.7	627	1060	996.9	710.7	526.1	474.9	465	609	707.3	871.8	1004	1042	1049	916.4	698.8	496.4	322.3	262.7	661.6	760.7	186.2	105.9	91.65	77.27
163.4	197.8	178	474.6	1007	854.6	724.9	510.2	410.3	491.5	565.7	670.4	833.9	952.4	1041	996.6	903.7	674.4	492.1	303.1	269.1	410.9	891.8	295.7	115.9	94.58	81	125.9
120.5	227.7	179.3	540.5	1000	946.9	802.2	574.2	424	513.2	522.3	673.3	741.9	894.6	961.6	1011	859	680.8	496.8	340.7	255.7	302.9	814.6	469	138.1	94.29	88.09	75.03
121.8	163.4	245.1	673.3	957.7	808.7	661.4	563.6	392.1	429.6	498.3	633.1	779.3	868.8	994.2	949.5	845.7	662.3	487.8	322	254.6	236	627.7	697	194.2	105.7	87.68	75.32	219.1
142	192.1	205.9	623.9	948.2	876.7	709.7	562.5	398.7	465.9	509.3	600.2	725.8	826.9	910	876	813.8	634.1	486.7	344.6	264.1	229	437.4	820.1	270.4	121.1	96.73	76.11	85.1
215	116.3	237	426.3	935.5	712.7	649.8	443.8	425.5	440.1	472.4	645.8	705.7	799	848.8	857.7	772.9	591.3	495.3	339.7	274.1	228	294.3	778.7	445.1	144.6	103.8	81.21	59.71	431.7
113.1	160.2	256.6	323.9	693.8	910.1	652.3	480.3	403.9	436.3	472.7	520.7	702	742.8	811.2	795.1	743.2	624.3	489.2	345.5	274.1	236.9	250.4	626.5	637.1	193.7	124	88.58	67.35	105.3
156.4	155.9	122.3	427.5	608.2	859.7	481.5	465.1	355.9	412	449.9	511	644.4	730.1	785.6	813.3	713.4	585.5	455.2	339.1	283.4	227.9	251.3	443.2	737.6	270.5	127.5	107.6	72.85	68.13	970.1
90.18	84.66	176.5	445.5	852.3	793.5	568.1	452.6	388.3	368.4	432.2	498.3	607.6	699.2	783.3	767.7	700.6	564.1	485	350.2	275.1	248.6	231.3	322.3	728.1	416	137.8	120.1	77.52	65.21	201.8
137.4	179.2	123.3	365.2	633.8	800.2	600.7	521.9	407.6	386.7	425.6	513.7	562.3	643	733	706.3	657.9	541.8	478.2	356.1	269.8	258.7	246.6	255	614.9	587.9	178	125.9	93.56	73.35	81.31
61.78	184.8	288.1	414.5	734.4	608.1	566.2	452.8	402.4	385.1	357.2	436.8	573.7	600.8	717.8	692.4	631.9	534.7	447.9	349.9	299	254.4	253.1	240.5	472.6	693	259.6	130.2	99.47	74.33	60.97	420.3
85.37	161.1	125	304	660.8	586.9	530.4	463.9	402.6	391.7	410.3	437.9	567.4	631.9	659.7	623.5	621.7	532.2	432.6	343.2	289.4	267.7	264.3	264.6	351.2	700.4	369.9	154	113.6	79.96	60.27	110.5
49.74	82.78	144.3	408.5	563.3	659.7	523.1	375.4	450.3	376	382.9	441.6	568.1	579.3	665.2	639.2	578.7	529.9	415.8	324	294	270.8	260.3	267.3	282.7	615.9	504.7	174.5	125.2	77.85	68.59	70.42
123.3	147.2	129	389.3	710.5	647.1	473.7	407.7	368.7	360.1	389.3	413.9	508.9	514.7	622.3	603	576.4	520.5	419	343.7	317.1	288.8	275.1	269.3	266.3	471.9	643.7	236.8	121.3	92.86	73.79	55.36	188.4
86.49	125.6	42.31	354.8	506.2	638	448.7	373.3	369.6	363.1	415.1	392.5	474.3	528.5	564.1	577.5	529	492.6	424.9	346.5	312.7	279.1	277.5	263.2	264.9	354.4	653.3	329.5	136.7	94.49	73.46	58.83	70.11
152.6	165.8	157.3	295.7	578.2	701.7	428.6	394.2	380	325.2	374.8	366.8	453.8	559.9	535.2	586.3	537.3	495.8	419.1	340.5	312.4	266.8	293.3	286.4	267.8	290.8	584.9	462.4	153.1	98.23	78.43	67.55	58.08	432.5
144.2	115.9	212.6	249.4	563.9	581.7	521.6	402.8	423.5	376.2	349.4	398.9	434.4	511.1	516.6	521.4	522.8	475.6	386	326.1	318.7	282.4	293.2	290.4	275.2	273.8	450.8	584	208.6	116.6	89.29	71.65	52.63	103.8
104.1	85.74	138.1	272.6	399.4	540.4	454.2	414.6	411.1	348.9	327.6	409	449.6	475.6	479	523	513.4	466.2	392.6	323.1	328.8	294.5	291	299.4	286.1	261.5	346.6	595	294.5	128.9	101.2	76.05	60.52	56.11	895
125	112.6	72.69	230.8	422.5	576.4	423.2	394.5	359.7	357.6	302.4	430.5	414.9	472.5	489.5	532.8	498.9	436.3	407	333.1	304.9	299.4	295.1	305.8	284.4	256.7	277.3	556.6	409.2	152.9	105.5	83.35	61.73	48.48	180.6
149.8	185.1	119.6	313.4	350.6	583.5	416.1	383.5	314.2	350.6	338.4	364.1	356.5	430.2	469.4	525	475.6	434.3	395.4	325.7	312.7	296.7	295	298.8	275.9	268.7	261.7	441.8	491.6	192.1	122.5	88.25	71.98	49.49	60.62
96.47	128.1	93.19	207.2	403.2	540.7	401.7	382.6	324.6	341	351.2	365.2	402.9	438.7	497.5	477.9	472.5	420.7	373.8	321.2	300.2	289.9	301.2	288.3	290.2	268	253.8	339	547.9	260.9	125.8	97.65	74.98	60.55	48.95
217.3	82.2	111.4	259.8	460.9	457.3	431.2	357.7	265	347.8	361.1	375	383	440.8	455.1	456.3	474.4	411.8	382.9	315.3	310	292.2	292	305.4	305.4	285.2	256.7	285.3	502.2	355.4	141.8	105.5	78.8	66.4	47.17	89.28
448.8	90.3	154.2	412.3	417.7	536	480.8	358.7	328.6	354.3	321.6	349.5	385.4	427.3	438	427.6	442	403.4	388.8	323.3	296.9	290.1	294.1	278.3	301.2	283.2	263.3	250.5	434.6	467.8	174.1	120.9	92.14	74.39	52.3	51.49	792.4
865.4	100.6	127.1	289.8	376.6	416	434.6	390.6	349.6	349.9	354	323.8	354.7	427.5	451.3	413.9	443.5	399.8	364.5	329	313.2	295.3	299.1	301.7	309.8	276.3	263.3	244.1	337.4	505.5	238	128.2	106.8	83.72	57.67	48.79	164.4
1984	52.52	109.9	303.9	473.2	488.7	410.3	349	354.4	318.3	353.2	347.2	314.8	384.2	428	442.2	446.9	419.8	358.1	314.2	316.3	299.4	295.4	298.6	295.6	289.9	273.6	249	282.2	503.4	325.3	146.1	115.6	88.32	64.89	52.51	58.66	1535
2327	132.7	254.6	238.6	419.6	538.1	371.1	368.4	347.4	329.5	330.6	343	336.3	352.2	420.2	435.4	439.8	397.7	358.6	313.6	278.6	285.1	293.4	293.6	299.8	283	263.9	261.5	255.3	428.7	415.4	179.7	127.2	100.8	78.74	50.15	43.62	340.5
	153.2	172.9	216	426.8	418	489.1	328.9	360.5	333.4	327.3	335.4	360.3	378.8	391.2	386.9	410.9	415.1	369.5	323.8	286.4	291.7	290.7	295.7	298.6	276.1	264	259.8	242.1	350.7	455.5	225.5	138.2	106.9	80.04	56.69	43.11	81.68
	455.3	90.47	326	416.5	467	408.5	349.4	336.9	347.7	308.2	317.2	365.9	378.9	422.7	412.7	411.4	428.8	386.1	332.3	289.7	278.2	294.1	292.7	292.5	292.7	273	266.1	246.7	284.4	475.8	305.3	150.3	119.9	93.21	61.16	40.66	39.35	705.2
	1188	140.5	231.1	394.5	456.9	353.8	360.3	298.7	321.7	313	306.5	326.5	359.1	391	385.9	417.8	395.5	352.7	306.4	277.3	288	291.6	291.6	297.4	283.2	284.2	273.5	241.6	259.6	427.8	383.4	172.8	124	102.5	78.89	51.39	31.5	140.3
	1966	131.1	221.1	478.9	502.5	435.5	366.4	319.8	312.1	295	343.7	334.2	321.3	380.1	384.2	386	389.4	363.4	317.3	278.2	271.9	284.6	280.7	282.3	298.2	302.6	269.4	257	245.9	361.6	445.6	222.2	141.4	104.1	79.22	58.66	32.87	45.64	1354
	2623	199.4	221.1	409.4	523.1	456.7	334.3	326.4	306.4	339.9	325.5	324.4	359.6	344.5	390.1	380.3	408	351.4	317.9	268.7	273.1	262.7	281.1	293.6	278.3	292.3	278.2	257.6	259.4	292.7	453.1	295.7	148.9	109.6	88.86	56.59	34.75	29.38	283.9
		256.5	314.7	401.7	366.4	415.7	349.2	339.6	296.2	325.6	323.3	331.7	343.9	352.7	358.9	381.7	401.5	373.6	307.9	287.7	270.2	279.2	277.7	290.6	280.2	295.7	269.3	261.7	260.2	263	401.9	358.1	164.5	119.6	85.22	61.97	39.24	26.76	65.26
		547.3	277.4	363.8	407.8	381.9	408.6	331.1	297	330.2	333.8	305.8	329.4	354.6	403.2	358.3	354.5	336.9	319.3	278.4	252.7	265.9	277.2	283.9	288.2	288.7	277.2	271.3	258.7	246.5	348.2	406	215.6	128.8	92.5	66.53	42.41	28.89	31.26	581
		1195	185.9	334.1	365.7	443.9	311.8	310.7	330.9	311.7	345	288.9	307.3	343.6	369.9	388.6	383.3	360.1	309.7	282.5	259.8	259.8	277.3	265.9	289.7	280.6	281.1	268.9	271	241.2	297.7	425.1	262.7	143.1	103.7	65.93	48.07	31.63	27.16	117.6
		2009	296.9	352	460.6	402.5	317.3	308.5	331.6	319.6	325.1	311.5	302.4	311.9	330.4	349.8	359.3	343.6	295.6	276.1	260.4	261.3	263.3	272	284.9	279.3	265.4	274.3	259.3	250.1	271.9	402.7	324.3	155.4	98.93	77.16	47.07	32.55	24.06	31.76	1252
			285.8	384	430	395.3	374.9	304.4	307.7	278.3	272.7	324.9	276.4	340.3	364.7	387.4	354.7	321.6	280.2	252.8	240.4	244.8	253.6	263.6	281.8	276.2	284	273.4	265.2	256.3	240.2	351	382.1	184.5	104.5	75.57	52	34.09	26.92	23.73	265.2
			349.1	399.4	356.1	416.2	344.8	312.1	325.8	319.8	288.3	318.5	262.5	334.6	347.6	360.6	318.6	333	287.8	238.3	253.3	244.5	262.7	274.1	260.3	276.7	264.7	277.9	264.1	260.6	241.2	299.8	397.3	218.7	113.2	81.37	56.48	34.42	24.88	22.13	55.73
			667.9	335.6	351.8	392	409.8	291.9	291	290.9	298.5	292.4	299.3	326.6	333.9	337.8	347	309.7	282.8	239.4	250	244.2	252.3	264	276.8	277.2	271	279.4	276.2	246.4	237.1	239.7	381.8	269.4	119.8	79.45	53.31	35.35	26.56	19.51	23.68
			1564	342.7	349.9	299.4	398.1	319	277	324.5	301.2	281.5	277	310.9	333.5	342.6	335.3	313.5	278.1	245.1	230.6	232.7	240	260	264.2	270.6	268.9	272.7	276.4	249.7	251	238.2	338.9	325.8	144.9	82.58	55.04	37.68	28.78	22.27	19.6	124.9
				485.2	398.2	307.6	299.7	306.7	291.5	284.3	292	274.8	288.6	326.6	325.3	336.9	325.5	316.7	276.8	240.8	239.6	230.9	225.9	245.9	253.4	259.1	261.5	262.4	260.8	254	241.7	231.7	278.7	339.2	176	83.41	58.64	35.72	27.78	21.82	18.34	37.52
				478	428.9	332.7	317.6	303.5	301.6	308	281	294.2	306.8	316.8	318.9	322.5	310.3	285	276.1	234.2	213.6	206.2	235.4	230.9	251.8	258.4	264.9	263.2	262.6	251.1	235.7	226.8	233.6	343.6	218.7	95.84	62.89	38.49	31.22	22.84	19.68	22.64	272.8
				666.6	506.8	346.5	308.3	293.7	312	280.9	259.1	265.4	279.1	276.5	331.8	317.9	317	278	253.4	221.7	207	209	224.7	227.5	247.4	232.6	259.9	245.6	263.7	247.3	227.7	218.9	205.4	300.5	255	112.1	57.16	46.72	29.56	21.7	20.86	23.11	59.3
				1408	392.7	282	290.3	291.4	304.9	302.1	282.2	260	302.6	264.1	277.9	311.3	304.1	269.6	237.6	220.7	214.1	212.1	211	231.6	232.7	232.8	249.4	245.5	256.9	242.4	231.1	209.4	203	260.9	278.5	135.3	68.31	45.38	30.68	22.23	21.69	23.22	27.76	537.4
					330.6	277.3	310.2	305.6	321.5	300.7	318.2	235	297.4	246.7	300.5	294.3	296.4	261.4	249.5	200.8	214	197.9	195.6	216.8	233.9	230.6	242.2	247.7	247.8	239.5	240	217.4	192.3	212.8	267.8	165.6	69.43	46.8	31.68	23.87	23.21	22.92	22.05	101.1
					434.4	361.1	305.3	276.8	269.3	270.3	287	278	286.6	268.7	307.3	314.7	290.5	278.1	220.6	198.9	192.3	187.2	202.2	205.1	210.7	228.2	237.2	234.1	246.2	229.6	233	209	192.9	176.8	257.5	199.6	80.62	50.74	35.36	21.96	27.11	24.79	20.65	29.68
					410.6	300.5	369.8	291.7	266.9	270	272.4	266.9	304.6	264.7	297.5	303.9	287.8	269.9	218.9	197.2	193.9	190.6	184.4	210.4	214.2	215.4	219.6	236.1	229.6	229.1	216.4	206.6	193.5	162.1	207.9	224.5	96.09	48.34	34.94	23.65	23.48	24.37	19.82	18.41
					841.8	256.1	334.6	274.2	312	284.5	247.2	290.8	269	274.3	278.6	269.7	256.6	252.7	209.2	197.1	186.5	185.2	184.2	191.8	210.8	208.7	205.3	230.7	233.4	232.6	209.1	202.7	179.2	158.4	162.6	224	118.4	50.61	39.27	25.01	24.22	24.58	21.39	14.82	47.26
					2044	333.8	235.4	255.4	274.7	266.8	257.9	249	249.4	283.6	280.8	265.5	285.3	248.8	218.4	188.1	178.3	173.6	180.2	189	198.3	199.9	211	217.8	226.1	225.9	211.1	207.4	179.5	157.5	143.4	214.8	157.9	58.6	36.83	26.89	23.44	24.64	22.59	15.49	17.68	439.8
						283.4	255.6	244.9	247.9	273.9	245.4	258.2	276.7	259.4	277.6	252.2	250.5	235.6	205.6	183.3	174.4	179.1	170.1	179.3	195.9	195.9	206.6	210.1	224	213.9	216.8	191.6	178.3	153.4	134.2	181	172.5	73.23	39.06	27.31	27.94	26.08	24.04	13.81	12.08	85.76
						307.4	244.6	268.6	272.1	289.2	251.8	236.6	256.9	246.7	265.9	224.9	259.9	222.1	195.1	179.9	167.7	170.6	166.1	173.8	186.8	192.4	205	199.9	208.7	205.4	200.8	188	168.1	155.2	126.8	140.9	180.9	87.78	39.46	28.94	29.24	27.89	26.51	16.38	13.64	22.29
						337.8	240	266.7	267.5	271.3	265.2	229.4	220.9	233	241.2	236.7	252	225.1	196.8	166.8	158.6	159.7	169.7	166	176.1	188	187.2	191	195.7	208.8	186.1	187.1	169.8	148.9	119.2	116.1	175.9	120.5	44.51	27.44	27.97	26.97	27.48	17.95	14.73	10.63	196.4
						792.9	236.2	263.1	278.1	260.2	238.1	218.3	195.8	219.6	219.9	223	235.2	207.7	180	165.3	158.5	155.1	161.4	155.6	165.8	167.4	182.3	190.2	193.1	199	186.3	180.9	154.8	140.5	120.6	102.7	147.6	140.3	57.06	27.57	30.11	32.64	29.63	19.96	13.5	8.333	37.76
							206.2	260.4	257.2	260.9	243.5	231.7	204.1	252.6	190.9	215.8	209.4	207.2	179	154.5	162.5	145.8	160.6	151.1	158.1	159.2	174.8	184.5	179.6	199.3	182.1	162.9	164.7	134.9	114.5	87.67	120.4	149.5	67.32	31.59	32.18	35.34	30.8	19.17	13.9	7.469	12.89	407.5
							270.5	222.4	217.6	239.1	252.8	225.7	225.1	234.2	213.4	227	213.6	198.3	168.1	152.8	144	137.1	143.6	144.9	158.2	162.8	175.7	173	180	183.5	177.8	165.9	152.5	121.2	106.2	89.1	98.06	151.9	88.09	30.85	32.68	35.23	34.17	23.17	14.19	7.107	8.278	75.74
							251.6	247.4	210.3	221.7	249.5	233.5	201.8	207.1	214.9	226.6	210.7	178.9	147.2	141.5	135.2	135.6	139.2	139.2	150.6	160.3	172.1	160.5	172.5	170.6	166.9	158.3	142.8	118.5	106.1	82.83	80.16	137.1	107.4	38.07	32.31	32.58	30.8	19.43	12.94	5.528	7.794	17.57
							292.1	212.1	217.3	219.1	229.5	202	197.9	181.5	203.2	230.9	192	172.3	153.7	133.9	130.3	129.8	125.6	135.4	142.5	156.5	162.6	160.1	157.8	166.8	169.4	158.7	137.1	117.4	100.9	82.49	75.51	102.6	120.1	47.66	29.58	31.36	32.29	19.75	14.3	5.19	6.877	9.278	193.7
							807.2	237.7	231.5	206.9	216.4	241.3	194.4	183.1	198.8	180	171.4	174.7	143.1	128	121.8	116.6	128.8	129.5	135.1	143.9	151.4	155.6	159.2	153.4	155.6	146.6	141	120.9	104.5	81.73	68.34	82.11	121.9	66.84	35.39	30.62	30.99	21.61	14.32	5.201	6.625	6.751	38.98
								244.9	233.4	189	224.3	217.9	209.3	196.4	199.9	177	173.1	165.8	153.8	117.9	118.3	108.3	126.1	113.2	128	131.9	141.2	143.1	147.7	152	149.2	139.9	131.1	119.7	96.95	73.92	66.87	59.66	120.3	82.75	36.91	29.59	28.63	17.81	13.47	5.846	5.993	6.444	14.89
								205.1	198.9	229.6	214.6	212.7	169.1	170.8	180.4	172	166.4	149.4	140.2	114.4	120.4	104.5	109.7	112	110.3	123.2	135.6	143.2	138.9	142.6	140.5	137.4	126.9	120.7	92.1	75.18	63.61	55.2	94.18	99.25	44.3	29.58	27.65	16.81	13.15	7.42	6.178	5.935	8.602
								217.3	188.3	210.1	171.1	211.7	185.8	177.5	158.6	176.9	166.2	143.6	126	113.1	110.9	111.4	103.8	106	108.6	123.4	137.4	130.7	132.1	136.8	132.6	134.7	124.6	109.8	86.31	70.97	60.71	51.33	74.81	103.5	50.81	34.37	26.26	16.71	12.82	7.569	5.021	5.236	6.846
									191.6	217.2	202.3	196.1	184	174.4	156	185.9	148.7	137.3	112.5	106.2	109	100.6	96.91	113.3	112	111.7	118	121.1	129.4	130.7	129.3	125.6	116.7	102.2	93.54	71.42	60.66	51.35	54.39	91.52	69.8	30.76	22.86	15.63	12.15	7.989	5.854	5.341	4.915
									199.3	191.8	216	196.6	170.2	162	164.6	150	158.9	138.7	106.3	111.4	97.28	89.84	91.58	99.3	116.4	109.7	117.7	114	117.9	118	125.5	115.3	111.5	100.6	87.22	73.71	52.73	44.03	44.03	79.9	82.62	34.06	20.75	14.86	12.86	6.992	6.578	4.415	4.469
									184.8	206.2	189.4	186	178	142.7	157.3	150.4	153.6	132.9	109.1	97.32	85.25	91.6	94.97	99.66	93.92	107.3	110.5	110	114.3	111.1	111	117.6	112.9	99.38	87.89	70.67	58.33	42.3	38.17	64.79	92.6	40.39	21.12	14.27	11.54	6.033	5.912	7.154	5.942
										167.6	165.7	175.4	156.3	147.7	145.2	142.1	133.8	124	103.5	99.5	88.76	85.59	94.41	86.2	97.03	97.17	106.5	101.7	111.6	111.8	108.6	106.9	102.3	88.23	79.58	69.09	47.79	40.73	35.22	47.36	88.68	56.49	22.03	14.61	11.33	6.441	6.155	5.766	4.549
										201.4	167.7	185.6	177.3	164.6	142.3	135.2	144.4	110.7	102.4	90.64	82.59	80.37	85.52	89.2	93.23	87.16	97.16	104.1	111.3	105.8	105.3	99.51	97.03	91.44	75.46	68.63	49.02	41.91	34.9	35.96	78.98	70.68	24.24	13.92	10.24	5.76	6.005	4.32	4.622
										148.8	150.3	173.5	141.1	137.9	146.9	142.5	125.9	110.8	87.79	85.06	77.14	81.68	77.18	74.95	84.84	89.87	96.56	92.41	102	100.6	101.1	102	99.65	92.44	71.32	56.34	45.2	37.68	34.55	30.84	65.79	76.83	34.14	15.23	9.73	7.849	5.098	6.213	6.066
										151.4	174.6	166.1	148	149.6	125.2	136.8	125.2	98.09	98.45	76.78	72.41	75.19	76.23	73.96	79.01	80.92	86.14	88.52	89.25	96.53	92.85	95.74	92.74	87.42	69.95	54.09	48.27	40.48	34.62	29.45	48.88	77.26	41.67	17.88	12.32	5.512	4.013	6.06	5.921
										151.8	155.7	160.5	157.3	149.2	130.5	126.7	121.1	103.7	86.21	74.23	76.64	68.88	64.94	61.13	75.58	77.34	81.95	82.59	87.89	93.19	86.65	94.69	82.93	76.52	65.66	57.46	50.51	42.02	30.46	28.72	35.61	72.54	54.39	18.75	12.19	6.497	5.281	6.083	5.704
										128.9	154.2	156.1	149.2	145.8	117.7	116.9	99.86	100.1	81.98	75.66	71.51	63.85	73.75	63.43	68.85	72.64	79.82	77.32	87.01	87.39	89.7	83.95	75.37	76.16	63.04	60.31	47.1	38.17	29.76	27.6	30.12	60.52	62.89	24.81	9.849	7.594	6.284	5.647	6.078
										145.9	165.2	166.7	146.5	136.5	122.1	112.5	107.2	90.45	75.67	70.17	64.53	59.83	61.47	65.88	70.88	78.38	71.06	77.59	74.33	84.2	83.12	82.88	82.55	71.98	65.77	51.71	45.52	36.26	27.97	26.43	26.64	47.53	71.03	32.66	11.92	8.312	5.762	6.734	5.66
												155	150	126	109.8	119.5	102	92.97	65.5	72.69	59.35	59.38	58.97	59.63	60.69	66.71	71.87	73.53	76.69	77.23	77.11	73.53	69.25	61.1	56.69	48.36	40.71	37.8	29.27	22.09	23.85	38.44	63.96	40.43	13.75	8.355	6.859	5.97	4.853
												137.5	144.5	113.3	118.3	122.2	98.72	89.71	74.86	63.84	57.48	58.25	60.26	60.47	61.94	68.3	62.01	75.64	72.01	77.17	75.58	75.79	75.61	66.16	56.31	47.45	35.15	35.17	27.31	25.87	25.91	26.65	57.13	45.7	17.98	8.169	6.191	5.737	4.713
												132.8	155.6	117.7	132.6	105.2	100.5	80.1	73.78	69.87	54.61	55.68	53.33	61.72	55.51	58.78	61.36	62.14	63.89	70.24	70.29	70.42	65.38	63.89	54.43	43.11	40.02	34.31	26.88	23.39	25.98	25.51	46.08	54.09	24.07	8.002	5.99	5.26	5.807
												110.8	137.8	125.6	109.7	102.4	94.52	74.62	67.17	58.07	51.76	58.17	52.97	52.31	50.56	58.77	60.89	70.3	58.81	63.06	65.92	60.68	62.09	60.59	48.39	44.73	41.59	29.79	26.19	24.47	23.94	23.41	35.94	59.7	30.8	11.54	7.409	5.521	6.24
												131.8	130.9	123.6	103.5	98.35	86.69	65.27	68.21	60.73	51	41.68	49.69	51.13	51.61	48.07	61.96	60.74	53.5	65.88	58.97	59.73	60.45	52.4	49.02	46.36	35.53	30.32	25.87	19.8	20.01	23.45	24.77	47.29	36.8	12.04	7.626	6.517	4.643
												119.7	127.4	107.6	107.5	98.89	89.33	75.83	63.43	56.21	42.87	44.97	52.08	49.68	50.99	56.71	56.36	57.88	55.43	61.39	56.85	58.48	58.21	53.5	43.97	40.85	37.15	30.21	24.49	19.7	22.45	21.29	23.07	39.1	46.14	17.3	7.984	6.463	5.306
												126.7	99.33	116.8	105.3	90.75	79.52	64.18	53.71	55.84	51.57	49.44	49.79	49.16	46.26	46.61	52.64	53.21	57.45	56.94	52.96	57.69	54.01	54.93	41.51	38.8	34.56	30.15	24.57	18.67	23.42	20.43	17.9	27.8	47.71	23.01	8.788	5.318	6.219
												125.5	96.38	101.7	109.8	105.3	79.5	68.04	59.17	50.65	45.86	46.83	44.36	42.28	46.94	46.39	46.28	49.26	54.11	49.47	52.76	51.77	52.51	50.82	37.4	37	31.54	26.52	21.71	18.9	20.28	19.4	18.81	21.24	43.58	32.27	9.43	8.603	5.906
												126.8	126	92.23	100.9	101.7	75.68	66.16	52.49	55.22	43.51	43.43	42.75	42.11	38.74	42.92	43.53	50.66	48.98	45.84	51.87	52.99	50.74	43.4	42.25	37.22	30.56	26.54	24.14	18.94	20.93	17.32	15.75	16.71	34.64	31.01	14.11	7.239	6.952
												124.7	93.96	113.1	97.85	83.31	72.05	62.53	46.14	47.88	41	40.94	46.03	43.54	39.51	41	44.49	46.15	46.29	46	48.15	48.88	46.08	43.25	42.19	34.31	29.95	23.8	23.12	19.83	21.14	16.93	15.88	14.61	26.99	40.84	18.31	7.348	6.534
												193.3	106.6	106.7	96.68	80.24	78	48.63	50.67	39.5	36.31	37.91	36.11	42.68	41.75	41.26	39.86	44.68	43.73	42.24	45.9	45.26	47.17	40.81	34.28	33.39	27.9	25.44	24.36	18.69	21.09	18.26	16.17	13.66	21.19	35.44	26.22	7.956	6.542
												585.3	100.7	89.55	93.85	81.7	77.98	56.56	47.15	37.97	36	36.28	33.78	38.11	36.89	38.85	45.45	41.85	43.28	43.04	46.54	42.75	38.61	35.84	32.84	29.98	27.43	24.46	20.43	20.05	17.59	17.94	12.78	13.61	14.42	30.57	26.26	9.378	6.63
												1591	121.7	91.46	92.55	80.32	74.81	53.04	48.36	38.71	36.55	34.69	31.88	38.76	37.19	37.06	38.71	37.13	38.48	41.36	41.55	39.9	37.49	35.1	31.7	31.87	27.52	23.83	22.44	19.47	18.12	20.06	14.85	11.51	14.81	29.46	30.05	14.38	8.031
												3569	104.9	110.3	85.37	77.96	67.79	50.54	46.9	40.03	36.16	36.99	32.46	34.49	32.89	34.05	37.95	41.41	34.85	41.25	36.99	35.52	39.96	32.87	35.8	29.99	24.61	20.69	20.67	19.38	16.83	17.24	14.66	13.86	9.881	22.11	35.72	17.68	7.043
													97.75	80.92	73.53	69.62	66.96	44.88	39.35	40.27	36.92	31.01	29.53	30.76	31.76	31.77	30.11	36.73	36.99	37.15	37.31	38.74	34.34	35.28	28.94	27.72	25.24	19.29	18.22	17.59	17.95	17.18	14.02	11.87	9.683	16.97	30.66	23.75	10.18
													145.9	90.87	72.9	70.74	63.85	43.06	32.63	38.48	33.73	29.02	28.83	33.66	30.81	31.11	30.85	31.85	36.34	32.75	37.83	36.86	33.61	31.34	27.47	27.91	23.76	21.78	19.55	16.29	16.45	16.05	14.72	13.14	9.351	12.32	27.79	28.04	12.42
													441.6	86.82	84.85	60.92	65.17	49.3	39.08	29.15	32.2	34.64	29.68	28.1	29.28	33.61	31.79	28.2	35.52	32.21	35.68	36.59	32.3	31.08	29.17	27.94	24.21	20.51	16.79	15.59	15.74	14.88	14.3	12.34	10.74	10.78	21.36	27.95	14.74
														68.6	81.05	61.08	56.24	44.74	36.41	30.52	27.82	27.56	26.26	30.01	28.32	28.69	34.42	29.85	31.26	30.78	34.81	32.95	37.48	29.49	28.71	22.98	21.92	18.09	17.64	14.41	15.61	13.35	12.96	11.61	9.215	8.612	16.94	28.53	18.73
														79.8	73.52	68.67	54.08	38.34	34.55	32.56	26.77	24.53	22.41	28.67	28.51	28.71	28.63	28.73	32.08	30.61	30.42	30.58	29.37	27.37	25.97	24.52	22.14	18.65	17.68	12.81	13.62	14.21	12.41	12.34	9.945	9.382	14.25	27.81	21.75
														86.78	76.41	67.42	53.31	42.45	39.19	27.39	24.24	24.73	23.62	23.44	23.52	27.66	27.21	28.05	31.93	23.9	27.66	27.71	26.02	31.03	27.03	19.21	21.67	17.8	17.17	12.79	13.81	14.21	11.06	11.17	9.594	8.112	8.957	20.98	23.52
														133.4	67.17	60.8	51.21	37.98	35.92	28.72	26.4	28.48	22.3	23.32	22.55	27	23.76	28.22	27.17	25.97	26.7	26.36	24.13	26.49	26.52	22.67	17.61	18.04	14.86	13.57	13.12	12.44	11.87	9.394	8.807	7.847	7.796	14.83	25.93
															72.79	59.18	51.86	37.85	29.47	23.4	21.9	22.89	20.51	25.63	20.93	21.54	28.76	22.49	23.57	26.95	27.44	28.01	26.51	23.67	21.48	21.61	15.61	19.42	15.41	14.04	13.28	11.22	9.738	8.777	8.727	8.398	6.7	12.21	25.87
															65.95	52	49.56	35.86	29.59	26.04	24.71	22.17	22.63	28.34	20.14	22.94	24.94	23.77	23.49	22.39	23.89	25.89	22.53	25.99	20.55	22.32	16.33	14.9	15.03	12.65	12.5	12.56	10.8	10.84	7.981	6.581	6.079	8.944	21.13
															72.41	50.21	47.09	32.38	30.51	25.84	20.78	22.23	18.5	20.71	22.89	19.45	21.52	20.69	25.26	26.22	23.85	22.28	23.33	24.89	19.35	18.28	16.34	14.24	13.58	12.11	11.73	9.689	8.423	9.825	8.4	7.027	6.443	6.443	14.94
															67.05	63.21	39.81	29.76	30.65	24.64	21.8	20.72	22.13	22.73	22.25	20.05	21.59	21.85	20.52	21.67	22.6	24.75	22.24	20.96	18.58	16.58	15.27	14.69	12.46	14.46	13.63	11.56	10.3	9.519	8.794	7.655	6.002	6.796	10.9
															102.5	52.37	37.91	36.72	26.6	24.42	19.94	17.6	18.18	17.4	19.03	18.16	21.6	21.32	20.13	22.99	20.05	23.35	17.23	18.8	18.88	14.98	15.32	14.17	13.24	12.1	11.84	10.6	9.463	8.438	6.737	6.817	5.951	5.667	9.364
															305.8	56.69	39.05	36.57	30.5	22.21	22.83	19.78	17.36	14.58	16.22	18.25	18.98	19.47	19.78	20.45	19.79	22.36	18.17	19.64	18.3	17.65	14.68	15.14	12.9	12.26	10.04	10.14	8.388	6.817	7.996	6.004	5.632	4.649	6.893
																49.77	38.06	36.28	26.11	22.76	19.42	16.46	18.6	18.15	16.25	19.74	16.56	18.08	18.62	18.38	20.07	20.78	17.94	16.58	16.04	16.41	11.07	9.796	12.33	10.78	9.879	7.827	7.594	7.655	7.253	6.874	4.99	6.102	5.686
																44.14	38.02	31.02	23.86	18.69	16.16	18.28	18.15	16.51	16.29	17.7	13.08	16.24	17.34	17.3	15.19	18.27	19.64	16.06	18.28	14.63	12.68	13.24	13.24	10.2	10.18	9.511	8.774	7.501	6.42	6.375	5.773	5.004	5.886
																51.98	34.51	28.57	19.83	19.78	18.65	16.72	12.89	14.57	17.33	18.9	13.84	17.79	15.7	16.91	16.85	16.58	16.21	15.34	16.09	14.26	14.55	11.65	11.27	8.738	8.069	9.094	7.618	7.471	7.726	6.334	5.578	5.154	5.492
																76.97	25.51	29.51	23.24	18.19	17.99	19.3	12.99	14.49	11.63	15.08	17.44	17.56	18.27	17.52	14.89	16.75	16.41	15.58	14.51	13.93	12.86	11.95	9.902	10.65	8.603	8.076	8.422	8.316	7.125	7.075	4.945	4.184	3.794
																236.8	32.74	25.17	20.11	15.95	18.3	17.43	15.99	15	17.57	13.55	12.5	15.7	13.24	17.04	15.58	17.72	18.32	13.78	13.83	11.71	9.639	13.93	8.241	10.15	7.397	7.517	8.326	6.585	5.391	6.642	4.393	4.961	3.912
																	29.67	31.64	15.35	14.89	18.87	13.71	13.04	14.4	12.98	14.64	11.56	13.29	16.42	15.4	13.55	14.05	13.7	15.57	11.34	10.78	11.51	10.35	8.132	9.923	5.883	8.715	6.78	6.053	4.532	4.247	5.217	4.767	4.019
																	37.28	27.93	21.96	14.2	15.2	13.79	12.89	16.95	11.96	12.27	10.57	13.66	13.44	14.44	13.7	15.45	14.5	13.41	11.4	11.61	11.82	10.5	7.804	8.874	6.953	7.074	5.538	6.556	5.599	4.224	5.846	5.511	4.814
																		24.51	16.16	15.7	14.68	10.41	15.54	10.84	12.9	13.1	13.23	15.6	13.96	12.67	13.87	13.64	13.29	10.25	11.69	9.194	10.45	7.158	7.284	7.521	6.517	6.359	6.093	6.498	4.825	4.556	4.736	4.14	4.524
																		22.19	17.83	14.38	14.9	13.05	11.68	9.488	12.49	10.78	11.76	13.2	12.83	14.24	13.52	12.5	11.51	9.851	11.7	8.734	9.278	7.887	8.644	6.491	6.468	5.613	5.773	5.842	4.749	4.368	4.485	3.96	4.448
																		23.5	17.98	14.59	13.58	11.5	12.61	9.649	12.94	11.99	10.63	11.92	13.32	12.46	11.35	10.64	9.467	11.2	13.08	7.525	10.46	6.068	6.657	6.17	6.126	5.009	5.608	4.904	5.402	4.02	3.244	4.584	3.412
																			17.92	13.15	16.24	11.92	13.47	9.831	10.08	11.87	8.294	11.28	10.01	11.19	8.835	10.03	11.95	11.23	8.339	7.932	5.995	6.298	7.303	6.175	5.943	6.738	6.148	4.84	5.009	4.307	3.368	3.947	4.137
																			16.22	12.23	9.765	7.627	9.727	10.34	6.408	9.35	7.252	11.05	9.061	11.39	10.65	11.48	11.23	10.09	11.73	9.054	6.879	7.076	5.864	7.982	7.709	4.879	5.939	5.666	4.806	3.301	2.679	3.55	4.556
																			17.85	15.16	10.34	10.6	10.97	8.601	9.666	8.174	9.392	9.066	8.18	9.132	10.14	8.697	10.19	10.26	10.13	9.078	7.862	7.694	6.859	6.411	6.338	4.743	4.984	4.253	4.043	3.754	4.018	4.333	4.046
																			16.17	14.7	10.86	8.483	7.296	12.5	7.487	8.696	10.89	8.944	8.45	8.191	9.6	7.555	7.673	9.003	7.861	8.479	8.613	5.646	5.462	6.375	6.072	4.973	4.752	4.039	4.534	3.658	3.299	3.749	2.804
																			11.81	9.349	7.358	10.03	8.245	9.596	9.319	8.437	7.468	8.487	7.762	8.699	9.064	8.683	10.16	7.866	8.417	6.71	7.55	4.349	5.881	6.099	4.739	4.522	5.109	3.629	4.607	4.643	3.66	4.008	2.644
																			11.3	10.03	9.898	9.857	8.972	8.291	7.823	8.73	6.74	8.536	9.023	9.16	8.637	8.824	8.377	7.944	9.487	8.318	6.279	4.246	5.34	5.154	3.989	4.885	4.425	4.963	5.158	3.499	3.579	3.637	2.921
																			16.1	13.42	10.29	7.189	6.675	8.575	7.44	9.331	7.492	8.292	6.787	7.555	8.384	6.804	6.976	8.111	7.657	6.403	6.421	6.584	5.631	3.779	4.481	4.906	4.319	3.738	4.25	3.324	3.029	2.659	3.588
																				12.56	7.251	8.06	7.739	6.739	9.206	7.068	6.55	8.321	8.469	6.601	8.826	6.843	7.533	6.475	7.298	6.977	5.37	6.644	5.578	4.364	3.692	3.976	3.297	3.835	3.458	2.694	3.117	2.998	2.826
																				13.5	8.868	8.165	8.106	7.954	5.186	8.122	8.691	7.138	6.406	7.139	8.413	7.548	6.973	6.582	7.709	6.71	5.966	5.098	4.555	4.64	3.526	4.207	4.269	3.785	3.542	3.87	3.194	3.226	2.113
																				12.29	11.86	8.321	7.944	4.767	7.617	5.197	7.635	7.79	7.232	6.702	9.504	6.431	7.643	6.487	6.986	5.936	5.093	4.691	5.031	4.142	2.975	3.391	2.599	4.428	2.882	3.041	3.608	2.64	2.713
																				13.29	9.909	5.431	8.49	7.778	5.646	7.17	6.444	6.206	5.381	6.623	7.925	6.752	7.281	7.709	5.867	3.765	4.208	3.706	4.807	4.541	4.434	4.615	2.945	3.532	3.362	2.729	2.615	3.085	2.045
																				15.57	10.8	7.743	7.965	5.273	7.427	6.901	5.975	5.812	6.854	6.888	8.053	7.029	5.415	6.221	7.019	4.919	4.676	4.915	4.615	5.035	3.72	4.296	3.403	2.787	2.245	2.591	3.085	2.997	2.388
																					7.09	7.016	7.763	5.83	4.646	5.724	4.894	5.481	5.461	5.864	5.736	5.423	5.591	5.082	4.924	5.406	4.536	3.296	3.681	4.655	3.618	2.918	4.288	3.272	2.713	1.892	2.306	2.767	1.853
																					9.195	5.565	7.052	6.582	6.393	5.952	5.549	5.498	5.055	6.465	5.976	5.13	4.301	4.808	4.523	4.051	5.29	3.603	4.21	2.973	2.853	2.49	2.919	4.035	2.365	2.194	1.814	1.906	1.799
																					9.642	7.283	5.72	5.658	6.68	6.241	5.035	5.669	4.793	6.087	4.232	5.257	4.676	5.717	4.586	3.655	3.687	4.807	3.366	4.192	3.963	3.357	2.246	3.151	1.966	2.554	1.108	2.255	1.563
																					9.633	6.472	6.183	5.067	6.087	2.904	5.994	4.468	6.126	4.952	6.272	4.793	4.134	5.01	3.954	5.048	3.679	4.786	3.617	2.838	4.173	3.555	3.496	2.184	1.691	2.712	1.94	1.517	1.902
																					8.541	7.139	6.98	5.034	6.63	4.861	4.011	3.932	5.826	5.441	4.696	5.323	5.008	5.527	3.855	3.61	3.907	4.066	2.959	2.826	2.86	2.481	2.35	2.387	2.983	2.201	2.069	1.789	1.496
																					11.07	5.988	4.399	5.922	5.538	6.759	5.709	4.758	6.374	4.997	4.277	5.463	5.054	4.061	5.029	2.727	4.18	3.108	3.557	2.473	3.353	3.078	2.613	1.817	1.516	2.175	2.252	1.969	2.248
																					21.89	6.088	3.551	3.412	5.993	6.059	5.737	4.803	4.341	6.482	5.144	3.755	4.796	3.653	3.433	3.515	3.717	2.798	3.044	2.255	2.795	3.217	2.213	3.305	2.662	2.297	1.822	1.162	1.585
																					71.34	6.584	4.663	3.727	6.032	7.872	4.402	3.34	3.03	5.076	5.032	3.247	4.641	3.617	3.613	4.45	3.496	3.876	3.384	2.465	2.422	2.397	3.21	2.556	1.766	2.077	1.871	1.883	1.316
																					192.8	5.714	4.763	3.782	5.357	4.657	3.749	4.582	6.252	4.527	4.115	3.21	5.287	3.251	5.125	3.005	3.506	2.023	2.45	2.468	2.303	3.57	2.566	2.134	1.79	1.868	1.595	2.295	1.519
[truncated: 1 more columns]
