# Supplementary material for: Utilization and transformation of Chrysotila dentata-derived dissolved organic matter by phycosphere bacteria Marinobacter hydrocarbonoclasticus and Bacillus firmus
Source: PeerJ. 2024 Jan 4;12:e16552. doi: 10.7717/peerj.16552 (PMC10771764; doi:10.7717/peerj.16552)
Supplement: Supplemental Information 12 [file peerj-12-16552-s012.xlsx]

## Sheet: Sheet1
-2.867	68.19	99.85	88.62	842.7
134.5	0.892	89.84	112.8	222.3
40.08	-12.07	19.47	197	127.2
21.08	109.8	64.57	189.8	327.4
33.13	69.14	103.1	239.4	394.8	246.6
55.51	28.99	66.42	189.2	449.9	255.5
45.34	13.84	82.6	63.66	486.2	432.8	428
50.44	117.7	52.87	86.17	273.2	645.6	238.2
180.3	89.45	21.86	82.55	180.5	702.4	374.9
85.53	74.86	36.77	47.77	86.05	624.9	498.9	258
169.1	15.77	46.38	121.2	102.1	451.7	689.3	185.2
57.87	38.38	87.59	70.33	33.87	198.5	799	354.5
105.6	69.62	50.88	93.4	44.89	108.7	687.3	544.3	187.7
24.58	12.84	61.24	40.98	99.49	54.72	514.9	818.5	191.9	1159
41.79	98.15	160.5	67.02	73.74	30.94	185.6	885.4	389.6	259.6
15.7	119.2	82.71	72.03	92.33	54.7	98.5	627.2	656.9	173.7
84.8	58.21	129.2	133.5	55.51	52.53	55.32	460	825	225.5	527.8
80.4	66.49	99.47	72.85	73.95	125.1	41.97	210	825.6	429.6	161.6
103.5	174	99.86	43	82.72	95.61	93.68	104.2	650	758.4	153.2
134.9	87.74	49.51	110.2	64.72	73.54	54.15	69.13	400.2	1020	309.7	264
107.3	97.58	143.2	192.6	103.9	80.13	84.39	55.17	176.9	1048	463	145.2
137.4	21.27	176.5	107.5	137.6	88.26	50.36	53.93	75.89	814.8	845.8	175.1	543.9
53.65	96.59	172.4	239.3	248.7	140.8	70.16	39.14	56.29	477.3	1074	271.5	174.6
150.6	57.82	119.8	268	321.5	242	101.1	41.47	78.17	213.6	1228	599.5	154.1
192.6	240.8	97.4	346.3	452.8	319	91.52	58.52	57.28	108.6	919.9	985.9	192	328.7
93.88	188.3	209	332.4	665.2	419.4	160.5	78.07	84.15	67.33	497.3	1387	321.1	227.9
64.64	101.5	145	445.3	586.2	560.2	263.2	84.53	77.78	77.53	275.1	1303	691.2	265.1
90.96	61.52	160.5	553.3	1001	762	291.2	116.6	78.63	81.33	181	1015	1197	355.4	420.3
134.3	55.24	184.4	537.1	1100	765.9	409.3	146.8	76.1	91.22	150.4	618.2	1618	565.7	484.8
89.36	186.9	199.7	642.9	1189	1001	549.9	188.2	95.63	101.9	169.6	374.2	1617	1074	581.8	731.6
70.43	169.6	183.4	726.6	1234	1233	635.3	219.4	120.9	129.2	211	340.9	1352	1618	770.2	731.4
127.7	112.7	234.3	714.5	1519	1378	728	293.2	206.8	143.7	234.5	319.1	1034	2154	1096	859.8	997.6
325.9	120.5	260.6	897.4	1637	1717	865.4	409.8	210.9	235.7	268.3	395.8	793.2	2249	1641	1031	842.2
174.6	114	380.2	936.2	1546	1790	955.1	437.7	266.1	254.8	319.7	497.4	769.8	1992	2290	1208	919.8
171	119.3	341.9	917	1789	1791	1037	501.9	255.8	278.1	341.9	530.5	751.5	1628	2805	1498	972.9	698.7
137.1	177	271.4	992.2	1722	1774	1168	577	268.9	317.3	383.1	603.6	830	1384	2831	2010	1140	643.6
201.6	133.5	312.2	811.4	1826	2110	1170	595.2	273.4	303.4	450	683	941.4	1296	2559	2542	1260	653.8	497.8
109.9	91.11	199.1	777	1920	2019	1099	627.4	408.2	371.8	553.7	643.4	943.8	1365	2151	2967	1461	739	322.9
148.5	76.28	355.2	969.6	1528	1886	1192	630.6	375.1	418.5	513.6	748.6	1023	1339	1962	3104	1809	767.5	307.8	654.2
79.75	20.09	208.2	899	1485	1902	1243	629.5	440.8	403.6	554.6	778.3	1071	1408	1730	2804	2358	799.5	304.1	219.4
187.6	101.1	291.1	760.6	1608	1923	1276	689.4	410.6	464.1	556.2	854	1150	1401	1756	2312	2684	948.2	359.9	166.4
152.7	137.7	202.7	967	1660	1792	1237	614.4	436.3	465.8	649.1	868.5	1212	1500	1810	2007	2802	1293	368.3	158	276.1
204.6	145.9	155.2	945.4	1641	1792	1154	644	480.2	512.1	680.3	925.7	1187	1553	1826	1837	2437	1714	410.8	160	125.1
193.6	107.5	154.2	911.2	1842	1799	1210	733.2	523.5	473.8	663.9	966.4	1278	1592	1784	1833	2046	2077	554.8	180.4	121.8
112.2	196	236.8	922.2	1756	1867	1322	615	470.5	571.3	741.6	997.3	1353	1701	1897	1869	1750	2166	827.3	210.4	109.8	135.7
133.9	220.6	235.8	815.4	1978	1569	1170	701.9	530.1	613.4	725.3	1080	1328	1652	1870	1842	1587	1916	1236	267.5	112.2	82.54
224.2	82.72	337	1077	2127	1751	1117	644.9	489.6	582.6	810.9	1059	1416	1719	1863	1847	1523	1557	1571	382.8	132	84.26	223.2
95.24	66.07	286.9	1043	2030	1897	1146	737.3	488.1	575	836	1074	1377	1712	1799	1848	1487	1257	1690	582.2	148.2	92.57	95.14	1870
90.45	129	272.9	875.4	2133	1824	1212	736	540.8	597	818.4	1051	1393	1666	1781	1787	1469	1090	1454	927.9	179.8	93.43	77.88	416.3
86.89	134.2	294.1	963.4	1787	1808	1128	768	534.7	641.5	798.6	1032	1343	1682	1779	1784	1411	1041	1107	1214	270.6	105	77.1	114
51.56	91.83	320.2	871.7	2116	1794	1292	675.1	548.1	583.1	773.8	1059	1313	1656	1794	1752	1447	986.8	829	1277	447.4	116.3	79.84	76.71	848.4
36.54	127.9	315	887.7	1939	1695	1289	743.4	543.1	634.2	763.1	1049	1294	1597	1718	1708	1381	1011	695.8	1140	716	140.4	86.81	62.82	176.6
202.1	120.7	206.2	856.3	2171	1638	1150	753	559.1	550.4	760.1	1048	1251	1517	1659	1707	1359	996.3	655.1	809.9	931.4	202.3	88.8	63.14	73.37
90.3	158.3	231.3	903.8	2027	1568	1183	750.4	542	584.2	722.1	964.5	1288	1530	1579	1593	1415	998.8	665.8	593.8	1049	358.3	89.28	73.44	59.33	352.7
125.8	76.63	166.6	985	1943	1605	1112	699.4	529.6	621.1	718.5	930.7	1195	1464	1615	1549	1296	1023	641.8	457.2	911.5	589.6	109.1	80.32	58.88	104.1
121	125.5	249.1	1025	1909	1692	907.7	676.1	522.1	589.4	724.1	960	1168	1465	1541	1496	1300	1002	628.8	401.1	666	795.9	169.3	80.39	78.47	65.45	691.3
176.9	210.6	178.1	795	1588	1532	987.5	661.9	521.5	587.6	697.8	906.2	1119	1336	1485	1429	1270	926.2	634.9	400.7	450.1	885.5	302.7	102.2	74.45	63.65	155.2
116.4	91.9	210.9	814.7	1473	1528	960.6	636.9	482.7	535.9	664	851.4	1050	1264	1419	1331	1159	923.9	646.6	371	332	821.5	489.5	108.1	84.85	71.43	75.41	1471
40.38	77.35	139.5	714	1298	1575	938	609.1	512.9	534.3	682.9	789.4	1043	1206	1304	1281	1092	894.6	648.1	379.7	284.6	612.4	693.5	160.3	93	74.81	63.96	310.5
40.03	100.6	265.8	766	1294	1434	899.5	629.5	490.1	538	615.3	756.3	967	1170	1273	1296	1053	902	644.4	383.7	254.6	417.4	807.6	263.6	99.66	86.99	67.66	95.4
55.6	112.8	153.9	828.3	1173	1291	861.3	627.2	494.1	501.6	559.3	783.6	875.5	1101	1225	1171	1024	876.3	613.1	381.6	260.8	296.4	726	431.5	119.6	89.09	72.3	65.59
125.8	42.66	248	408.8	1295	1209	845.9	650.3	463.5	489.9	589.8	733	894.8	1107	1161	1160	1004	814.4	605.3	397	283.5	231.1	554.5	622.8	163.5	100.1	78.2	59.54	147.2
129.7	79.94	160.1	576	1218	1123	834.6	580.8	500.3	510.9	542.7	751.9	859.1	1026	1063	1090	988.8	760.2	579.8	410.5	271.1	214.6	399.3	733.8	249.6	116.4	85.7	61.15	67	1259
145.6	16.4	153.5	521.6	1072	1084	891	535.2	473.9	477.2	500.8	692.7	796.3	907.3	1021	1061	948	791.8	566.3	396	283.8	230.7	275.2	698.2	402.7	128.2	95.54	72.03	58.15	271.5
51.47	105.7	74.89	590.2	853.2	1162	768.2	518.2	486.9	430.9	542.4	629.2	765.7	929	975.1	1005	912.6	731.2	581.7	397.1	280.3	235.7	232.4	561.2	574.1	164.9	110.6	83.88	57.49	78.94
229.6	165.6	157.5	379.1	846.1	1113	722.3	517.5	456.7	463.6	511.3	622.5	786.5	836.4	955.2	924.2	885.8	739.9	589.8	394.2	279.4	245.2	228	425.7	684	247.1	116.2	91.85	65.84	49.01
123.5	42.41	84.64	421.4	978.6	1025	839.4	550	427.4	463.4	491.8	591.3	733.8	807.5	831.4	898.3	830.6	689.7	568.1	384.2	296.5	255.9	227.5	308.2	661.2	372.2	132.4	106.3	76.8	43.91	133.5
172.2	283.3	224.3	359.3	1099	923.2	742.4	578.5	468.3	438.8	508.6	573	677.4	791	852.2	861.6	813.4	684	548.1	377.9	305.4	260	233.7	253.2	566.5	518.1	161.3	107.5	84.49	52.72	54.56
117.8	178.8	127	432	843.8	828.1	781.7	494.1	515.3	413.4	496.8	485.7	646.3	713.4	851.8	811.8	767.4	646.1	535.9	400.4	297.4	271.9	253.8	238.1	424.9	630.7	225	119.9	88.92	60.36	41.82	254.7
90.93	78.38	270.1	280.7	827.1	969.6	750.1	532.7	482.9	445.7	465.3	523.4	625.1	726.2	783.6	813.3	754.2	638.6	520.1	383.1	312.3	276.5	259.7	246.8	326.1	618.2	334.4	127.6	93.13	71.08	51.18	74.03
51.33	78.22	101.8	406.5	699.8	888.9	635.9	506.7	419.7	431.3	457.5	515.6	651.5	704.7	746.3	794.3	697.9	615.1	505.7	376.6	308.8	284	249.3	249.1	267.3	531	472.3	163.8	99.54	68.29	48.05	42.63	553.2
115.7	143.1	71.69	468.7	744.5	783.1	682.2	463.7	444.1	428.4	425.8	512.6	620.1	651.8	725.1	743	663.6	587	506.4	381.3	310.6	295.4	279.4	259.6	256.3	441.8	552.3	218.2	108.4	77.4	55.7	41.99	122.3
171.3	94.73	150.9	349.7	713.8	697.8	630	438.5	448.7	469.2	450.8	493.9	599.3	620.2	717.8	722.4	676	578.9	497.2	396.9	298.5	290.4	275.5	253.4	242.3	318.8	581.9	293.8	122.6	80.21	63.59	47	57.1
166.4	68.84	132.6	336.4	553	792.6	649	510.6	388.3	425.3	419.5	533.4	568.5	626.8	670	659.9	644.9	588.6	481.5	365.5	309.1	293.6	267.7	267.1	245.1	265.8	511	406.1	135.4	82.12	65.01	49.77	43.33	247.7
82.88	79.14	127	307.5	695.5	753.7	641.8	490.1	404.2	410.2	417.5	542.6	527.2	599.3	610.3	646.3	585.2	544.9	455.4	364.7	291.7	286.3	277.1	263.1	242.4	244.4	411.6	495.2	181.7	97.99	70.73	58.28	45.76	68.97
152.3	78.63	80.85	296.5	523.8	669.3	553.9	425.3	496.6	404.7	398.2	489.2	531.4	550	579.6	601.4	587.1	535.9	435.9	351.3	306.4	301.4	292.1	283.9	262.2	244.5	311.4	522.9	261.8	108.3	77.96	65.8	49.1	45.09	510.2
83.13	158	153.9	218	565.8	716.9	599	482	388.5	398.8	397.3	456.3	516.6	519.4	560.5	601.9	589.7	504.8	454.2	355.3	304.1	292.6	278	259.4	260.6	248.8	256.2	484.5	358	118.9	87.88	70.1	48.98	40.84	110.4
144.3	71.25	133	233.9	627	777	458.1	450.9	367.1	410.7	435	455.7	496.2	522.9	555.6	567.2	574.8	488.5	417.3	357.3	326.1	278.7	289	269.6	270.6	236.9	230.3	390.6	428.8	163	97.43	78.42	61.83	45.75	48.72
56.46	172.6	157.1	202.5	638.4	687.2	462.2	473.8	412.7	398.5	445.2	427.4	492.7	517	571.5	548.4	535.8	483.3	419.4	359.9	298.4	304.3	276.1	276	260.8	257.4	225.5	298.5	481.4	232.8	106.2	84.46	64.21	47.42	39.21	212.3
86.74	51.08	128.2	299.2	417.6	518.4	492.5	380.1	428.9	396.9	435.3	395.6	499.8	489.7	527.1	531.7	502.8	481.2	404.5	355.9	299.7	282.8	284	273.2	270.7	258.8	234.5	244	450.2	317.2	127.1	91.76	72.67	54.68	40.32	59.66
513.2	205.6	103	361.8	478.5	499	457.8	453.9	413.9	375.8	374	357.3	495.8	492.4	493.8	505.4	517	438.9	395.8	341.2	304	288.4	280.2	276	277.7	254	226.9	234.2	375.1	390.2	157.8	103	88.86	59.99	51.35	38.94	442.8
993.8	55.78	68.52	356.1	497.1	533	443.9	442.6	402.9	401.9	398.3	406.8	456.5	500.2	503.5	510.4	502.5	464.7	404.3	344.8	292	276.6	283.7	259.2	283.4	249.3	238.9	219.4	288.4	450.6	205.6	114.3	93.2	75.71	57.13	40.96	93.59
2219	111.4	98.49	224.8	460.8	530.8	486.1	378.8	386.5	405.2	387.1	401	453.9	443.5	491.2	501.6	434.2	443.2	418.7	337.3	299.6	271.3	278.1	273.3	272	257.2	250.5	221.6	246.7	434.5	280.1	131	106	80.27	63.04	38.8	37.74
2796	50.87	144.7	241	378.7	591.2	474.8	401.9	352.9	387.7	374.2	379.7	416.8	414.5	488.1	472.2	466.8	430.6	405.5	333.4	302.3	269.2	290.7	277.6	263.9	263	243.2	235.6	220.8	364.9	375.2	161.4	108.5	87.02	66.64	46.08	34.14	187.2
3064	389.6	153.8	367.6	394	483.7	517	426.5	384.9	402	354.4	418.4	406.4	421.1	452.2	469.1	473.3	422.7	395.8	321.2	278	272.9	277.1	271.5	275.2	269.2	252.5	228.3	224.2	297.2	418.3	203.5	118.5	93.26	72.52	50.44	33.53	52.46
	593.5	187.2	353.3	458.5	554.7	514.3	408.2	396	373.3	398.1	399.4	401.2	390.5	444	468.2	453.4	425.6	380.9	338.1	284.6	279.4	260.4	276.7	274.4	257.7	252.9	233.8	216.1	252.8	418.2	281.4	133.8	101.6	81.61	56.32	35.93	31.2	378.5
	1590	118.1	268.8	412.5	579	455.3	371.6	409.6	361	363.5	377.4	397.3	414.8	447.8	430.3	441.4	434.4	379	340.3	289.7	259.8	262.3	263	267.2	264.2	251	234.5	218	221.3	365.9	350.4	153.8	118.4	84.46	67.58	40.18	29.17	77.86
	2638	173.4	302.3	602.3	472.4	415	387.8	351.4	360.1	357.4	395.2	361.1	405.9	421.5	426.7	428.1	414.4	362	318.5	277.3	263.3	262.9	265.4	260.9	259.3	263.3	247.9	233.6	216.2	305.2	393.9	202.2	133.3	94.55	70.51	41.87	31.42	32.64
		98.18	193.9	468.4	565	438.9	388.3	344.3	356.6	385.3	354.7	368.4	377	392.3	421.7	428.6	409.4	380.1	302.5	271.7	263	256.5	257.5	264.6	263.9	253.9	241.9	239.9	215.2	259.9	401.5	264.4	143	100.4	72.62	54.23	32.77	23.32	148.5
		269.7	261	425	505.7	379.1	360.8	353.9	342.9	359.7	345.4	392.2	325.3	404.2	417.5	391.2	380	363	314.6	260.9	262.9	253.6	272.3	259.3	268	258.6	260.8	241.6	223.4	229.5	364.3	320	157.5	101.3	75.24	58.42	37.41	25.74	37.71	1334
		779.1	275.6	501	444.4	451.1	420.3	385.6	334.6	392.7	380.7	387.5	366.3	366.5	379.7	415.6	384.6	354.7	294.3	263.2	240.8	245.6	257.7	261.9	263	262.9	263.7	248.4	229	220.7	310.3	379.9	190.1	114.8	84.7	58.22	42.27	26.7	23.79	310
		1402	300.7	459.6	504.9	365.5	387.4	358.8	326.1	344.9	342.6	397.2	353.2	381.9	389.5	391.3	382.9	348.2	294.6	251.3	254	265.7	266	257.5	258.9	267.2	249.5	245.5	237.6	228.2	278	396.7	236.2	131.3	92.08	62.75	40.32	25.67	19.19	64.51	2352
		2681	148.8	338.8	568.9	410.9	374.4	340.1	327.2	357.6	321.9	347	377.4	390.9	398.5	387.9	366.5	352.4	315.1	256.2	242.4	261.5	256	256.7	255.1	255.7	254.6	253.7	228.4	227.6	240.5	363	293.4	137.1	97.39	62.44	40.18	30.13	19.35	25.26	691.7
		4079	283.8	529.3	353.4	406.2	309.2	357.4	326	361.6	373.6	337.3	379.7	372.3	401.1	355.4	358.1	346.8	304.8	251.6	235.3	245.8	243.2	249.2	253.6	253.3	260.1	249.8	233.7	240.5	229.8	318.5	356.7	165.8	100.9	70.23	44.53	32.56	21.15	17.22	141.1
		4180	376.5	437	375.3	422.1	405	339.9	340.4	337.4	342.3	377.7	319.7	367.5	346.8	377	347.6	319.4	285	258	230.8	228.3	243.4	236.3	245.9	236.6	262.5	253.5	237.2	229.9	224.1	266.5	364.9	198.1	107.2	75.52	46.03	30.02	20.59	16.97	33.07
			1140	424	416.2	357.3	371	351.3	296.8	363.7	342.4	378.2	359	359.2	367.3	387.7	360.5	319.1	281.8	242.6	223.9	228.6	238.8	237.5	246.1	245.9	255.6	252.8	239.1	223.9	227.9	228.2	349	246.9	100.7	78.53	47.17	33.82	25.8	16.03	18.22	294
			1933	351.9	409.8	391.5	375.5	385.8	336.8	360.1	361.1	324.8	339	341.1	358.3	337.9	349.8	332.8	265.2	233.6	214.5	217.8	237.3	232	241.4	247	245.1	242.4	236.1	233.2	217.7	211	303.6	285.9	132.4	72.12	48.55	34.08	22.76	19.01	14.71	54.71
			3555	338.9	481.6	360.6	304.7	324.6	333.3	324.2	314.4	307.1	322.7	314.2	358.2	353.4	327.8	314.1	276.4	230.7	233.9	208	217.9	228.8	235.3	237.9	244.7	233.1	241.6	234.3	212.6	215.4	254.7	311.9	153.5	82.12	54.08	32.84	24.24	19.46	14.15	18.91	585.1
			5466	442.2	398.8	357.8	307.3	311.9	304.8	294.9	300.2	330.8	323.5	300.9	335.7	337.3	327.5	302.9	262.6	218	231.6	203.5	218.6	224.2	227.4	244.8	234.1	237	234.5	228.9	214.5	212.9	225.3	306.7	193.3	86.55	51.4	36.23	26.62	18.83	13.43	12.98	112.7
				762.1	323.1	303.3	317.3	339.4	291.8	320.6	335.1	323	306.5	299.1	333.5	346.2	339.2	303.9	262.4	219.2	201.5	202.8	206.3	208.8	221.9	219.1	226.2	229	231.1	229.5	212.9	204.1	193.1	269.6	236.6	99.01	54.77	34.42	28.29	18.64	13.47	12.84	27.69
					455.1	308.4	347.7	303.8	298.3	341.3	389.1	347.9	321.4	307.5	316.8	324.8	306.9	294	244.8	207.8	206.1	191.7	206.9	207.4	215.4	221.7	221.6	223.7	220.3	225.1	221.2	186.4	188.2	234.2	247.2	119.7	55.68	38.05	29.61	19.2	15.96	13.05	12.75
					412.8	346.7	346	311.2	338.3	303.6	311.7	307.8	317.1	335.1	299.6	334.8	296.4	281	235.8	192.5	199.3	180.8	204.1	205.6	213.8	210.8	221.1	235	221.2	222.4	204.7	200.9	190.3	193.8	252.5	144.2	63.93	39.81	30.78	24.46	15.19	13	9.257	46.66
					402.8	345.9	372.2	335.7	291	306	295.8	306.7	317.2	293.5	289.4	304.3	317.2	263.6	218.9	199.5	199	188.1	180.9	194.9	210.1	212.2	223.5	226.3	220.8	224.8	213	190.5	180.6	172.2	232.7	173	69.94	43.06	30.52	22.55	15.05	11.74	8.671	14.28	506.7
					492.4	302.9	339.8	309.3	276.3	303.9	293	308.2	288.4	280.9	304.2	302.4	291.9	273.3	211.3	202.8	180.7	180	183.6	182.5	193.2	216.4	216.5	213.2	223.7	217.7	203.5	196.2	174.4	147.9	193.1	207.3	84.29	45.1	32.71	24.77	17.33	13.21	8.657	10.19	100
					959.6	367.8	376.8	283.6	309.7	276.3	266.1	319.6	302.4	247.4	296.4	302	286.5	247.1	216.4	188	169	176.7	187.8	183	194.2	195	217.1	207.8	211.4	210.8	196.9	197.5	173.3	152.5	159.4	208.9	107.1	46.28	31.72	25.18	16.46	13.61	9.094	9.683	24.05
						289.4	312.4	308.7	249.9	286.5	304.7	279.8	256.5	250	295.7	282.8	251.1	238.1	217.7	174.7	172.7	173.1	173.7	171.6	173.3	197.3	200.1	207.9	196.7	197.6	201.4	187.3	180.3	140.2	130.6	188	135.2	53.61	34.06	24.46	19.41	13.45	10.38	8.078	10.74	226.3
						319	309	294.1	238	309.9	307.6	281.1	278	277.6	296.1	249.6	260	234.2	201.3	174.1	180.6	168	165.5	170.2	173.7	182.7	192.3	203.8	200.8	190.9	189.1	181.9	168.5	139	118.8	162.8	158.5	65.62	32.04	27.01	18.41	12.32	10.94	8.06	9.692	42.04	1670
						310.3	286	307.1	270.9	282.1	313.1	289.8	272.2	264.3	272.6	255.1	242.9	217	189.7	159.8	167.6	164.8	158.3	162.3	174.8	178.3	190.8	200	194.2	191.6	193.1	168	166.1	135.8	115.4	125	170.4	76.34	32.55	26.33	18.83	13.56	11.49	7.981	9.856	12.63	485.8
						389.9	277.2	309.5	258.6	310.2	279.4	285.8	241	277.1	293.5	230.6	235.9	203.3	187.6	160.1	157.2	144.2	154.7	160.9	170.7	171.6	187.9	190.3	187.4	184.3	182.8	170.9	152.7	135	108.3	106.3	153.1	99.83	41.18	26.12	16.39	13.06	11.56	8.396	7.893	8.161	94.79
						1141	260.9	259.6	277.7	291.1	276.8	268.5	269.8	263.5	269.8	228.8	217	197.2	183.5	145.4	148.6	142.1	151	159.6	151.2	168.9	175.2	183.8	181.5	175.1	173.6	156.4	150.5	135.9	113.8	90.31	135.2	120.5	47.9	24.83	18.56	15.07	10.5	7.541	6.508	7.279	20.55	876.4
							282.4	243.9	256.3	250.1	268.2	288	272.7	254.7	234.4	203.2	211.1	194.6	164.4	145.3	145.2	138.1	144	148	159.4	156.3	166.2	169.9	182.3	170.2	173.1	156.2	157	132.6	109.8	89.17	109.2	135.7	57.02	26.66	21.02	15.16	11.07	8.339	7.487	6.268	8.684	204.7
							200.6	237.4	222.5	235.9	256.6	257.8	227.3	244.6	232.5	231.5	211.2	198.3	158.6	140.7	141.9	138.6	134.3	135.7	148.8	152.7	161	162.5	169.7	168.4	165.5	149.6	141.2	127.1	95.74	82.21	83.92	125.3	72.26	29.76	19.55	17.2	10.56	8.824	6.457	5.931	6.625	37.6
							212.6	232.8	258.6	255.5	260.6	281.8	222.5	274.4	245.6	228.1	184	180.6	162.8	126.6	140.8	141.2	135.9	141.9	137.9	152.9	151	157.7	155.9	157.1	161.7	141.9	139.1	121.9	101.7	79.19	69.57	120.8	90.83	33.46	18.63	13.83	12.3	9.371	6.963	6.073	5.697	10.63	452.3
							377.7	264.9	257.8	267.4	249.5	246	228.5	263.8	204.4	195.6	202.5	180.8	143.8	140.6	126.5	120.2	122.7	129.5	127.5	134.1	142.4	155.4	151.8	152.7	147.7	144.4	139.3	116.6	93.17	79.54	63.08	96.68	112.2	44.39	21.58	16.81	12.23	10.87	8.404	4.722	5.346	6.317	87.7
								241.6	208.3	256.6	256.1	236.2	233.8	225.3	200.8	212.4	176.9	158.5	151.8	127.2	116.6	119.2	111.3	123	132.2	128.8	133	150.2	140.2	152.6	152.9	139.5	123	112.2	95.22	74.82	60.16	75.96	106.3	58.11	21.98	14.36	11.36	9.344	6.672	4.864	5.7	4.882	19.29
								184.6	232.4	240.2	258.6	234.9	210.8	217.5	205	191.4	183	157.9	147.1	132	101.3	123.7	113.8	121.5	114.7	118.6	136.8	137	140.5	143.5	135.5	132.8	125.3	113.9	95.78	73.24	58.97	59.92	92.13	70.64	25.1	15.19	12.05	8.559	7.401	5.247	4.385	4.43	9.895
								221.6	213.7	234.5	243.4	222.1	206.2	200.6	186	178.6	166.7	144.5	132.7	115.5	115.7	114.3	112	111.9	108.4	123	127.1	133	135.3	133.6	130.5	126.9	116.7	108.5	94.82	70.65	58.63	52.27	85.05	82.09	30.85	15.76	12.36	8.876	6.925	6.126	4.116	3.668	5.94
								258.7	248.2	256.3	223.5	194.9	180.4	206.7	190.5	181.9	168.4	139.1	125.3	115.1	109.7	100	108.8	99.98	106.6	116.6	124.3	127.5	114.3	125.3	132.7	118.6	117.1	104.4	85.32	70.46	54.52	47.91	63.53	89.66	41.23	16.42	10.98	8.894	6.805	6.61	4.043	3.626	4.919
									242.4	236.3	230.2	211	223	200.5	179.7	182.2	161.4	142.8	121.4	87.41	101.6	87.29	102.4	95.07	107	110.2	118.3	127.1	123.3	128.6	115.2	118.7	113.4	100.8	82.46	65.27	54.95	43.36	48.2	85	55.76	17.88	12.12	8.718	7.897	6.12	4.874	3.787	4.16
									193.9	226.1	213.8	201.4	191.3	195	186.2	161.1	155.5	126	114.8	104	95.2	96.71	88.18	92.84	103.7	113.4	106.6	114.2	117.8	116.8	119.8	111	101.3	93.05	80.74	61.94	47.51	38.54	41.11	76.81	65.57	23.31	13.07	9.966	6.632	5.372	4.732	4.133	4.863
									215.3	186.9	197.6	199.2	198.1	185.7	166.8	157.2	155.2	131.9	109.1	102.2	85.73	88.52	92.19	88.14	98.16	99.89	101.6	110.8	110.2	112	105.8	100.4	100.7	90.87	78.59	64.28	47.1	41.27	33.98	59.16	74	32.15	11.93	8.831	7.797	5.549	5.491	5.18	4.856
									202.5	189	191.9	182.7	202.8	164.9	152.5	148.9	139.9	120.7	101.6	103.4	87.41	91.25	85.14	86.87	88.57	89.89	91.51	105.3	105.5	110.6	106.8	100.4	101.4	88.43	70.82	60.86	46.35	39.08	31.82	43.1	71.63	42.31	15.09	9.859	5.803	5.588	5.359	4.016	3.683
									179.8	215.8	194.5	186.7	178.5	163.1	161.7	145.9	128.9	117.9	95.51	93.76	76.61	73.54	80.28	85.09	94.75	87.42	85.39	97.25	96.18	100.4	101.3	102.3	94.62	82.41	73.58	60.58	45.65	36.35	31	32.39	63.14	52.89	16.8	10.99	8.508	4.539	4.85	4.025	3.283
										179.8	189.1	166.9	171.5	150.3	152.9	134.7	129.6	115.4	96.13	76.67	70.52	66.22	70.93	76.16	78.2	81.06	88.53	96.15	96.26	95.74	99.29	93.15	88.84	75.3	72.13	59.62	43.56	41.53	29.57	28	47.53	57.21	23.06	11.25	8.297	4.548	4.278	4.169	3.961
										178.4	162.3	187.7	168.9	158.2	132.3	130.2	130.4	107.8	85.08	78.79	73.35	61.24	72.33	80.29	77.38	80.13	82.77	88.16	81.62	89.97	89.33	92.64	84.41	78.04	62.32	53.91	46.12	37.6	27.09	24.76	36.58	65.71	31.22	11.3	6.809	5.134	4.851	5.226	3.579
										190.1	179.5	171.4	177.4	148.4	129.9	131.1	116.6	103	87.57	73.94	75.71	61.49	65.75	70.39	76.11	81.5	79.34	86.35	82.02	88.41	88.21	87.75	79.51	71.77	63.58	47.61	41.44	32.74	27.67	25.74	28.21	59.56	39.09	12.18	7.397	5.232	4.648	5.205	4.367
										173	164.9	186.1	153.6	132.7	135.3	136.7	114.2	107.1	80.95	77.58	77.56	64.28	63.2	67.6	75.12	67.13	81.03	80.64	82.74	79.42	81.99	82.91	75	72.03	59.85	50.65	40.14	34.52	27.43	22.68	20.82	46.41	49.83	17.32	8.443	6.284	4.211	4.425	3.524
										177.1	160.4	157.7	139.4	149.7	126.7	117.9	108	103.2	87.92	73.84	64.46	64.09	62.78	61.77	63.64	75.45	70.15	79.92	78.06	77.9	73.82	76.02	75.99	69.81	55.54	48.17	39.14	30.74	25.71	23.54	20.66	37.34	53.51	24.32	10.39	6.099	5.011	4.149	5.253
										265.5	142.4	160.4	158.9	139.7	125.2	121.2	99.34	94.46	75.79	69.91	63.37	59.71	56.58	61.12	62.1	61.77	58.58	66.45	74.25	71.56	72.64	71.18	66.98	56.8	59.38	49.7	36.32	33.21	26.78	21.59	18.99	24.86	53.27	29.19	10.62	6.706	5.033	5.019	3.939
										861.9	150.6	155.3	154.7	143.5	119.1	125.1	113.1	90.12	70.2	67.83	62.37	56.04	60.08	59.48	55.29	68.74	65.4	67.63	74.21	70.46	74.08	71.01	74.42	60.18	55.14	43.85	38.61	29.1	23.33	21.53	19.94	20.81	45.8	40.24	12.17	5.69	4.912	4.38	4.231
											130.9	166	137.8	127.7	118.3	116.3	104.2	74.91	66.82	68.49	59.66	56.97	54.81	64.46	56.25	55.58	60.9	68.95	69.82	65.02	70.14	61.36	66.6	56.74	50.25	47.05	37.43	31.49	23.91	21.61	18.71	16.71	36.01	44.94	18.41	7.225	6.089	4.817	3.051
											147.4	143.3	129.7	129.8	110.9	115.2	95.83	77.52	67.93	56.93	54.95	53.93	50.94	50.47	54.81	54.3	51.6	66.43	56.69	66.13	62.22	56.96	57.47	53.19	44.86	39.47	36.78	29.84	22.65	21.73	18.38	15.96	26.27	45.59	24.7	9.485	6.295	4.842	4.69
											162.4	145.1	152.4	128.4	114.5	102.4	86.67	78.03	63.92	52.56	54.65	48.78	51.31	51.85	56.48	55.43	54.02	63.42	56.76	55.31	55.47	61.21	59.76	49.58	45.26	39.63	36.04	30.32	22.66	19.62	17.08	15.86	19.82	40.03	33.09	9.968	5.977	4.553	4.875
											229.1	169.6	135.8	124.9	130.3	111.2	95.41	70.31	63.47	56.11	51.32	46.29	51.59	49.91	54.51	53.02	52.29	58.69	59.52	55.84	54.42	55.3	53.4	46.15	47.02	38.83	31.93	26.94	25.63	21.76	18.37	13.99	14.1	30.92	33.27	14.6	4.809	4.552	4.405
											769.9	145.8	138	127.3	118.3	103	81.1	72.18	59.82	49.78	45.58	48.17	45.52	42.76	44.04	49.04	50.48	57.32	52.71	53.99	50.42	55.86	55.78	49.86	42.74	37.22	28.55	27.54	25.24	20.29	15.5	13.67	13.83	23.67	36.7	18.7	6.378	4.335	5.07
												143.5	120.8	110.2	111.6	106.5	86.97	74.24	53.18	55.17	46.42	46	45.81	48.11	42.02	46.93	48.08	47.57	48.68	49.85	48.88	50.83	47.97	49.21	41.33	38.81	28.98	24.99	21.02	18.9	13.71	14.17	10.81	18.01	35.63	25.83	9.244	6.863	4.989
												131.3	120.5	118.2	108.6	99.21	68.89	68.6	54.23	51.55	43.42	39.61	45.07	45.31	38.35	44.87	46.32	46.32	48.3	48.89	49.96	45.6	47.4	41.82	37.58	38.49	29.51	24.48	21.15	19.9	12.98	14.96	11.35	13.83	28.36	32.77	11.32	6.305	4.954
												132.1	106.9	111.9	98.42	94.86	72.67	67.8	49.15	50.2	39.98	40.22	39.14	40.63	41.76	39.65	43.83	47.21	44.88	42.81	45.28	47.14	46.59	44.25	37.43	32.93	26.48	26.21	19.72	18.4	13.88	12.59	11.72	11.16	24.65	35.73	15.7	7.545	5.007
												191.8	113.7	104.9	90.46	93.8	76.89	60.69	55.25	42.27	41.62	34.54	35.41	35.46	35.09	41.1	39.53	41.63	41.8	43.67	49.4	45.23	42.92	38.94	33.53	30.13	25.58	23.88	21.02	17.04	15.13	12.53	12.07	9.594	20.7	34.93	20.3	6.497	4.49
													90.85	102	94.29	85.33	74.61	54.55	47.22	40.23	48.49	37.78	35.67	36.67	35.02	39.35	35.42	43.66	36.8	40.26	39.39	38.85	38.06	36.82	34.36	31.27	26.42	22.68	17.83	14.81	15.17	12.55	11.55	10.06	14.56	31.12	24.77	8.188	5.241
													96.32	101.8	78.03	82.46	70.08	56.55	49.67	39.24	39.39	34.67	33.73	34.39	36.6	36.65	38.01	40.04	36.06	39.45	37.44	35.15	38.36	36.82	31.47	29.88	24.72	21.47	18.61	15.27	13.85	14.04	10.55	9.38	9.45	24.42	28.14	10.77	5.176
													91.26	104.1	81.16	67.1	60.59	50.3	50.83	35.72	39.47	32.99	34.57	36	30.82	36.73	40.28	39.35	35.63	38.2	37.23	38.23	38.65	31.55	26.45	32.14	22.88	19.27	18.39	15.27	12.43	12.31	11.09	9.081	8.351	18.16	31.63	16.79	6.291
													106.2	86.36	79.17	78.8	66.34	55.8	43.05	33.18	36.85	31.44	34.06	33.14	32.44	33.93	35.56	34.13	37.27	35.17	34.88	37.35	34.37	33.95	28.91	26.69	22.88	17.28	17.82	14.67	15.05	11.65	10.87	9.619	8.632	15.15	27.53	19.93	6.592
													159.8	98.23	81.22	69.42	60.04	52.14	42.67	41.4	36.73	28.77	29.2	33	34.93	33.3	32.26	35.36	35.78	34.42	30.87	35.21	33.94	30.08	29.58	25.29	22.74	19.51	16.49	14.26	12.73	11.33	10.38	8.361	8.355	10.25	25.57	22.85	9.455
													480.9	82.38	84.55	59.62	60.33	50.25	37.49	34.27	27.73	31.02	30.48	32.34	30.04	29.72	29.85	32.21	32.08	29.78	34.52	28.45	29.07	32.02	26.79	25.49	21.54	16.59	16.94	13.95	13.15	10.21	11.04	7.99	7.756	9.235	18.24	24.36	12.95
													1432	91.54	78.13	70.04	57.05	45.42	42.97	31.3	27.09	30.17	28.63	27.58	29.02	27.4	24.67	29.69	29.2	30.24	31.67	33.2	28.19	27.76	25.89	21.31	21.71	16.83	14.4	12.98	13.11	11.65	9.534	7.836	8.025	7.511	14.28	25.33	15.7
														81.08	78.31	70.85	53.72	41.75	39.32	27.5	25.2	25.15	26.06	24.23	28.56	32.49	26.76	30.46	27.63	28.44	29.31	28.43	28.56	24.97	26.15	19.48	22.2	16.45	12.48	12.25	10.14	9.943	9.718	8.816	8.481	7.277	9.655	22.04	19.49
														85.49	75.19	51.92	43.22	39.59	40.6	24.02	26.73	24.39	25.74	24.77	25.11	27.85	25.83	27.69	27.16	27.81	24.52	25.96	26.89	24.97	20.88	21.82	18.63	14.9	14.38	12.9	10.36	10.27	9.665	8.28	8.256	7.515	9.036	18.48	23.23
														145	74.82	52.73	51.37	38.15	35.9	24.96	24.42	29.37	23.52	22.51	23.47	25.17	26.12	29.52	24.21	23.32	24.73	22.98	26.88	21.39	21.61	19.36	19.33	15.12	14.36	11.96	9.952	11.33	9.11	9.066	7.463	6.805	6.897	14.52	22.17
														422.5	71.58	58.64	51.08	40.2	24.42	29.05	20.08	23.82	23.71	20.85	21.72	27.8	23.71	21.55	26.78	26.47	26.65	25.13	23.15	23.77	18.86	17.68	17.05	14.02	13	12.42	10.11	10.55	8.751	7.645	7.239	6.192	6.291	10.15	20.02
														1167	65.07	68.26	48.01	37.72	30.1	23.38	24.64	24.45	21.43	25.01	22.56	22.81	23.93	23.77	22.53	26.05	23.68	23.71	24.17	24.22	18.74	15.54	17.06	14.86	11.85	9.917	11.09	9.655	8.986	8.603	6.922	5.676	5.696	7.41	16.14
														2691	55.22	58.22	45.88	35.44	28.53	27.02	24.98	22.81	20.43	24.04	21.26	18.18	20.6	22.36	20.07	21.23	20.81	19.88	20.85	20.02	19.44	15.42	16.68	15.17	11.57	9.889	9.914	8.725	7.49	9.168	8.244	5.676	5.78	6.54	14.38
														4732	65.56	49.93	43.26	39.34	26.63	23.02	23.73	20.34	20.48	20.06	18.02	19.58	22.6	20.49	18.86	21.81	18.84	20.21	20.41	19.19	18.85	14.61	12.3	11.12	12.96	11.18	9.544	7.937	8.246	8.424	6.571	4.903	5.594	6.747	11.65
															99.81	49.71	40.8	30.43	24.44	19.22	21.95	21.23	19.81	21.2	20.58	18.83	19.08	17	20.28	19.94	19.1	20.31	21.77	17.8	17.85	13.37	12.1	13.99	10.44	10.31	10.35	9.221	7.374	7.786	5.948	6.439	3.931	5.861	6.996
															327.6	54.31	38.57	31.49	23.92	16.91	22.32	17.01	19.09	17.46	19.88	17.03	19.66	18.39	20.43	19.87	20.74	20.79	18.64	17.95	17.1	14.64	14	12.23	10.7	9.335	8.979	7.81	8.936	7.052	6.097	5.799	4.891	4.763	4.682
															902	49.99	36.85	30.61	23.54	21.53	17.47	16.64	15.25	16.14	15.83	17.92	19.62	16.5	17.85	17.99	17.89	20.04	16.8	17.82	16.25	12.25	13.11	11.17	10.14	10.28	7.669	8.271	7.384	6.914	6.498	6.045	4.698	5.706	4.526
															1903	47.13	32.92	32.1	25.71	21.9	20.04	18.78	15.52	17.3	17.34	15.32	15.57	15.93	17.66	19.83	18.22	19.05	17.97	14.2	15.79	14.84	12.82	10.78	10.39	9.915	9.55	7.114	5.662	6.147	6.842	4.856	3.375	4.783	4.625
															3697	43.51	33.06	25.37	22.96	18.12	17.48	16.38	14.38	17.84	14.39	18.38	17.09	15.16	18.5	17.23	16.3	15.22	16.52	16.17	16.36	13.01	13.04	10.79	10.7	6.912	8.766	7.216	5.743	5.384	6.73	5.317	4.26	3.823	3.041
																75.2	29.28	24.59	19.91	15.02	14.22	15.98	15.13	14.98	12.88	15.83	11.59	12.33	14.97	17.21	14.96	14.61	13.61	15.25	13.34	12.53	10.46	10.56	10.32	7.45	6.799	6.691	5.664	6.661	5.182	4.257	4.569	4.106	3.166
																226.3	37.64	24.38	21.42	15.2	13.77	14.87	14.01	13.57	15.01	14.17	14.64	11.82	14.59	12.8	15.1	13.75	15.06	14.07	13.17	11.9	10.31	10.07	9.083	7.655	6.011	6.657	7.231	6.303	4.624	5.606	5.342	3.635	3.694
																652.4	34.83	26.31	17.51	14.89	13.24	12.47	13.55	12.64	12.58	11.66	14.27	13.77	15.51	16.97	14.95	12.53	14.35	12.37	13.75	11.15	10.45	9.205	7.73	8.719	6.839	6.479	6.155	4.764	5.159	4.094	4.206	3.954	3.287
																1537	33.43	28	16.55	15.33	14.67	11.05	11.93	9.88	10.71	11.31	12.77	14.06	13.45	12.12	13.61	14.34	13.92	13.51	13.29	8.539	8.819	9.501	8.248	7.185	6.003	5.62	4.033	5.66	3.895	4.65	3.482	3.573	3.423
																2593	30.59	21.28	18.27	14.43	12.25	10.78	11.65	12.21	11.83	11.5	10.58	14.43	12.39	10.65	10.44	10.88	14.79	14.67	9.959	10.35	9.556	8.529	8.021	6.434	5.79	6.187	4.389	4.685	3.998	3.502	3.138	3.761	3.689
																4143	55.07	20.84	17.58	16.36	13.41	10.1	10.94	11.95	10.7	13.02	11.01	10.61	12.76	13.75	11.34	11.85	12.64	10.01	8.538	10.3	9.258	7.959	6.909	6.599	5.486	4.257	4.889	3.897	4.637	3.703	3.821	5.087	3.221
																	163.2	19.02	16.27	12.47	11.18	12.62	11.71	12.27	10.19	10.97	10	10.43	11.84	11.46	9.768	10.21	12.07	8.492	11.12	9.521	7.635	7.332	6.625	5.678	5.407	5.417	4.965	5.665	3.113	3.2	3.766	3.317	3.04
																	451.5	17.75	15.81	12.59	13.59	9.16	11.86	9.244	8.146	9.995	11.42	11.79	10.77	11.39	10.34	7.505	13.07	10.37	10.46	7.7	7.461	7.32	6.655	6.155	5.077	5.439	4.594	5.088	4.016	3.032	3.352	3.664	3.45
																	1083	23.24	17.69	12.56	10.49	10.25	11.23	11.14	11.33	7.915	9.727	10.29	13.28	9.693	11.63	8.037	9.397	8.213	9.379	8.424	7.316	6.586	4.9	4.725	4.628	5.022	4.318	4.778	4.002	3.341	3.011	3.992	2.559
																	1980	26.88	14.65	16.32	11.78	9.167	7.876	8.976	8.173	8.535	8.349	7.563	8.924	10.9	9.609	8.48	8.604	8.764	8.431	8.022	5.592	7.225	4.517	5.328	4.933	5.318	5.416	4.972	3.199	3.079	2.564	2.983	2.481
																	3130	41.54	15.25	13.66	13.5	10.74	7.201	9.602	7.775	7.406	10.25	8.083	11.13	8.212	9.248	8.592	8.187	8.868	8.746	7.162	5.079	7.407	5.235	5.648	6.048	5.21	4.855	4.296	3.866	4.658	3.671	2.976	2.775
																	4197	133.6	16.23	14.77	12.11	8.118	8.73	9.785	8.301	9.774	9.306	7.65	9.189	8.662	8.1	9.827	9.447	8.512	7.105	7.635	5.35	6.672	6.44	3.927	3.948	4.491	4.36	2.299	3.861	3.062	2.325	2.711	2.507
																	4845	342.2	15.27	12.33	11.99	10.51	7.541	8.362	8.256	8.228	6.665	7.491	9.161	6.446	7.717	6.695	9.16	8.018	5.019	6.294	5.303	5.279	5.74	4.666	3.999	3.98	4.393	3.557	2.57	2.726	2.892	3.409	2.666
																		807.8	17.75	8.779	8.981	8.723	7.791	9.55	6.719	7.305	5.587	5.836	7.134	7.961	6.873	7.116	7.784	8.422	6.234	4.947	6.178	4.973	4.408	5.514	4.488	3.711	3.426	2.885	3.197	2.672	3.492	2.987	2.973
																		1491	18.8	11.38	7.834	8.412	7.806	7.006	7.544	5.467	7.278	8.427	7.327	7.525	6.011	6.358	8.415	7.525	5.817	6.035	5.005	4.054	4.073	3.524	4.168	3.339	3.363	3.534	2.923	3.229	3.166	2.33	1.651
																		2508	34.48	10.41	10.82	8.155	6.335	7.225	7.351	8.282	7.221	8.88	4.902	5.44	7.459	7.229	7.75	4.703	4.808	5.554	7.79	4.629	3.863	3.39	4.067	3.298	2.709	3.291	3.136	2.052	2.951	2.586	2.656
																		3343	102.9	11.25	9.376	6.432	9.412	5.956	7.887	5.52	6.058	6.868	5.246	6.092	6.251	6.903	7.293	5.786	6.316	4.948	4.971	5.19	3.128	4.225	3.61	3.065	2.906	2.98	3.618	3.016	2.684	1.921	1.817
																		3888	273.4	10.07	9.273	7.27	6.875	6.131	5.706	6.957	6.972	6.652	5.611	6.521	5.09	5.759	6.939	5.707	5.343	5.048	3.54	5.569	4.833	5.049	3.151	3.677	2.811	1.993	3.319	2.319	3.219	1.868	1.233
																			632.4	9.325	9.151	7.122	5.427	6.952	7.503	7.112	4.518	7.188	7.485	6.371	5.443	6.327	6.361	5.781	6.313	3.597	4.454	4.757	4.541	3.95	3.746	3.257	3.582	3.196	3.322	1.671	2.368	2.291	2.338
																			1284	10.96	8.36	6.962	5.126	5.615	6.174	7.52	4.422	5.293	6.227	5.062	3.916	4.93	4.787	5.7	4.249	4.379	4.759	3.689	4.238	2.803	3.68	2.533	2.294	2.393	2.697	1.916	2.463	2.865	2.144
																			2049	30.5	9.833	7.423	6.923	5.139	6.669	4.465	5.404	5.55	5.689	5.454	5.441	6.966	4.268	5.224	4.225	5.518	3.466	4.917	4.332	3.895	2.769	2.53	2.236	2.842	2.069	2.141	1.722	2.112	1.943
																				83	8.186	8.063	4.913	5.455	4.809	7.023	5.13	4.881	4.824	4.445	3.834	6.137	6.112	3.987	4.027	3.513	3.649	4.042	3.86	2.705	2.504	2.63	3.231	3.581	1.544	1.769	1.263	3.073	1.639
																				249.7	8.663	4.908	6.24	4.835	4.936	5.604	4.61	5.753	4.834	3.52	5.504	4.447	5.509	3.488	4.016	4.188	4.384	3.529	2.914	2.836	3.395	1.892	2.886	2.226	1.886	1.717	1.794	2.082	1.801
																				548.2	9.932	9.005	5.806	5.678	5.021	5.283	3.458	4.755	3.864	4.673	4.269	4.038	4.522	4.096	2.824	3.631	3.192	2.915	3.097	3.03	2.269	1.52	2.399	2.912	2.245	1.973	2.194	1.692	1.635
																					10.14	8.411	4.398	4.499	4.967	5.406	3.92	4.922	4.564	4.361	5.639	4.443	4.315	3.779	4.687	3.249	3.729	2.925	3.158	2.602	2.924	1.104	2.17	1.777	2.281	2.572	1.795	1.525	1.881
																					26.37	6.86	6.423	3.732	5.028	4.474	4.76	4.496	3.172	5.709	4.14	3.567	3.847	3.937	4.418	3.026	4.546	3.158	3.431	3.464	2.151	3.37	1.642	1.664	1.768	1.42	2.078	2.209	1.372
																					74.76	5.872	4.294	5.383	3.164	3.758	5.478	3.59	3.849	3.403	3.961	3.57	3.356	3.026	3.501	1.864	3.424	2.688	2.234	2.426	1.826	2.655	1.883	1.669	1.759	1.673	1.479	1.691	1.506
																					181.7	7.483	4.792	5.296	3.344	3.72	4.736	3.756	2.683	3.717	2.723	3.619	3.374	3.657	2.992	2.604	3.338	2.265	2.327	2.401	2.625	2.723	1.877	1.939	1.76	1.674	1.913	1.242	1.356
[truncated: 1 more columns]
