# Supplementary material for: Utilization and transformation of Chrysotila dentata-derived dissolved organic matter by phycosphere bacteria Marinobacter hydrocarbonoclasticus and Bacillus firmus
Source: PeerJ. 2024 Jan 4;12:e16552. doi: 10.7717/peerj.16552 (PMC10771764; doi:10.7717/peerj.16552)
Supplement: Supplemental Information 13 [file peerj-12-16552-s013.xlsx]

## Sheet: Sheet1
Report date:	10:56:59, 05/19/2021
Sample:	111
File name:	1_20210519_105627.FD3
Run date:	10:54:05, 05/19/2021
Operator:	sgs
Comment:
Instrument
Model:	F-7100 FL Spectrophotometer
Serial number:	2912-002
ROM Version:	5J14000 12
Instrument parameters
Measurement type:	3-D scan
Data mode:	Fluorescence
EX Start WL:	200.0 nm
EX End WL:	450.0 nm
EX Sampling interval:	5.0 nm
EM Start WL:	230.0 nm
EM End WL:	600.0 nm
EM Sampling interval:	2.0 nm
Scan speed:	30000 nm/min
EX Slit:	5.0 nm
EM Slit:	5.0 nm
PMT Voltage:	700 V
Response:	Auto
Corrected spectra:	Off
Shutter control:	Off
Contour interval:	60
Peak integration
Integration method:	Rectangular
Sensitivity:	1
Threshold:	0.1
Peaks
No.	ApexEX/EM(nm)	Height(Data)
1	205.0/372.0	240.8
2	205.0/492.0	207.8
3	205.0/510.0	113
4	205.0/522.0	192.2
5	205.0/556.0	95.43
6	205.0/570.0	112
7	210.0/256.0	209.9
8	210.0/418.0	5161
9	210.0/516.0	115.6
10	210.0/536.0	84.92
11	215.0/258.0	217.1
12	215.0/468.0	195.6
13	215.0/506.0	113.3
14	215.0/512.0	98.77
15	215.0/542.0	109.2
16	215.0/550.0	90.21
17	215.0/560.0	83.63
18	215.0/576.0	100.2
19	215.0/582.0	86.4
20	220.0/332.0	1357
21	220.0/410.0	256.5
22	220.0/476.0	316.8
23	220.0/514.0	130
24	220.0/524.0	83.28
25	220.0/562.0	104.6
26	220.0/570.0	129.6
27	220.0/586.0	114.8
28	225.0/246.0	799.5
29	225.0/300.0	1005
30	225.0/312.0	1033
31	225.0/330.0	1413
32	225.0/340.0	1314
33	225.0/398.0	357.7
34	225.0/420.0	246.2
35	225.0/486.0	406
36	225.0/534.0	82.8
37	225.0/548.0	86.9
38	225.0/558.0	51.59
39	225.0/578.0	151.6
40	225.0/594.0	139
41	230.0/252.0	969
42	230.0/394.0	360.6
43	230.0/412.0	310.8
44	230.0/434.0	236.6
45	230.0/500.0	374.2
46	230.0/556.0	66.98
47	235.0/258.0	1053
48	235.0/422.0	227.5
49	235.0/430.0	252.3
50	235.0/508.0	374.5
51	235.0/554.0	41.66
52	240.0/264.0	1212
53	240.0/444.0	241.3
54	240.0/520.0	337.3
55	240.0/570.0	43.27
56	245.0/270.0	1295
57	245.0/402.0	268.1
58	245.0/418.0	214.1
59	245.0/426.0	223.6
60	245.0/536.0	341.9
61	245.0/586.0	31.42
62	250.0/274.0	1490
63	250.0/424.0	215.8
64	250.0/548.0	333.5
65	255.0/282.0	1570
66	255.0/404.0	243.8
67	255.0/420.0	209.6
68	255.0/442.0	207
69	255.0/452.0	190.9
70	255.0/472.0	173.4
71	255.0/560.0	322.8
72	260.0/288.0	1853
73	260.0/408.0	235.7
74	260.0/414.0	207.2
75	260.0/428.0	218
76	260.0/474.0	176.1
77	260.0/572.0	347.6
78	265.0/292.0	2264
79	265.0/424.0	206.8
80	265.0/446.0	194.6
81	265.0/454.0	180.4
82	265.0/464.0	156.9
83	265.0/482.0	131
84	265.0/528.0	*****
85	265.0/586.0	320.8
86	270.0/300.0	2473
87	270.0/332.0	1344
88	270.0/436.0	185.5
89	270.0/462.0	150.3
90	270.0/474.0	128.9
91	270.0/538.0	*****
92	275.0/306.0	2550
93	275.0/440.0	180.8
94	280.0/312.0	2384
95	285.0/318.0	2135
96	290.0/324.0	1818
97	295.0/330.0	1429
98	300.0/336.0	1170
99	305.0/342.0	977.5
100	305.0/554.0	11.98
101	310.0/256.0	8.322
102	310.0/348.0	819.3
103	310.0/410.0	138.5
104	310.0/530.0	12.22
105	310.0/564.0	9.026
106	315.0/238.0	5.574
107	315.0/354.0	743.4
108	315.0/466.0	48.77
109	315.0/566.0	7.351
110	315.0/580.0	5.279
111	315.0/590.0	6.975
112	320.0/250.0	5.217
113	320.0/360.0	676.8
114	320.0/504.0	23.7
115	320.0/532.0	12.35
116	320.0/548.0	9.063
117	320.0/576.0	5.637
118	325.0/258.0	5.239
119	325.0/368.0	603.6
120	325.0/442.0	75.54
121	325.0/458.0	59.44
122	325.0/518.0	15.61
123	325.0/568.0	6.993
124	325.0/578.0	5.34
125	325.0/584.0	5.912
126	330.0/238.0	3.583
127	330.0/256.0	4.232
128	330.0/374.0	543.4
129	330.0/422.0	93.86
130	330.0/444.0	76.73
131	330.0/464.0	56.66
132	330.0/560.0	6.776
133	330.0/572.0	4.884
134	335.0/242.0	2.658
135	335.0/276.0	5.616
136	335.0/380.0	477.7
137	335.0/446.0	74.91
138	335.0/532.0	12.93
139	335.0/552.0	8.932
140	335.0/566.0	5.599
141	335.0/578.0	4.248
142	335.0/592.0	4.789
143	340.0/286.0	7.187
144	340.0/386.0	427.8
145	340.0/436.0	81.82
146	340.0/472.0	52.13
147	340.0/546.0	7.177
148	345.0/244.0	2.613
149	345.0/274.0	5.027
150	345.0/298.0	6.625
151	345.0/392.0	363.8
152	345.0/422.0	78.87
153	345.0/560.0	6.395
154	345.0/570.0	4.909
155	350.0/258.0	3.244
156	350.0/282.0	3.895
157	350.0/398.0	325.1
158	350.0/442.0	80.02
159	350.0/592.0	3.721
160	355.0/244.0	2.654
161	355.0/308.0	5.228
162	355.0/404.0	300.3
163	355.0/438.0	85.82
164	355.0/454.0	77.31
165	355.0/546.0	8.757
166	355.0/572.0	4.671
167	355.0/588.0	3.283
168	360.0/256.0	2.371
169	360.0/274.0	2.983
170	360.0/302.0	4.687
171	360.0/412.0	280.6
172	360.0/436.0	80.03
173	360.0/522.0	18.43
174	360.0/566.0	7.141
175	365.0/238.0	1.662
176	365.0/246.0	1.98
177	365.0/264.0	2.575
178	365.0/288.0	3.504
179	365.0/306.0	4.875
180	365.0/418.0	271.7
181	365.0/452.0	74.29
182	365.0/568.0	6.474
183	365.0/580.0	3.681
184	370.0/248.0	1.709
185	370.0/260.0	1.945
186	370.0/272.0	2.65
187	370.0/280.0	2.963
188	370.0/314.0	3.313
189	370.0/424.0	243.9
190	370.0/570.0	6.01
191	375.0/246.0	1.716
192	375.0/270.0	2.071
193	375.0/284.0	2.719
194	375.0/306.0	3.365
195	375.0/318.0	3.708
196	375.0/432.0	221.4
197	375.0/586.0	4.017
198	380.0/282.0	3.452
199	380.0/296.0	2.371
200	380.0/438.0	189.6
201	380.0/578.0	4.4
202	380.0/594.0	2.483
203	385.0/240.0	1.207
204	385.0/260.0	1.527
205	385.0/278.0	2.506
206	385.0/316.0	2.711
207	385.0/336.0	2.811
208	385.0/444.0	162.6
209	390.0/248.0	1.204
210	390.0/292.0	2.137
211	390.0/300.0	1.954
212	390.0/320.0	2.265
213	390.0/338.0	2.44
214	390.0/450.0	141.5
215	390.0/572.0	3.754
216	395.0/238.0	0.987
217	395.0/268.0	2.512
218	395.0/282.0	2.223
219	395.0/296.0	1.865
220	395.0/308.0	2.012
221	395.0/326.0	2.131
222	395.0/340.0	2.566
223	395.0/456.0	116
224	395.0/540.0	7.482
225	395.0/592.0	3.059
226	400.0/246.0	1.3
227	400.0/288.0	1.78
228	400.0/348.0	2.506
229	400.0/464.0	96.74
230	405.0/242.0	0.838
231	405.0/256.0	1.51
232	405.0/272.0	1.56
233	405.0/316.0	1.696
234	405.0/360.0	2.137
235	405.0/370.0	2.319
236	405.0/470.0	78.7
237	405.0/540.0	5.735
238	405.0/572.0	3.147
239	410.0/238.0	1.054
240	410.0/266.0	1.424
241	410.0/280.0	1.75
242	410.0/290.0	1.42
243	410.0/300.0	1.535
244	410.0/310.0	1.453
245	410.0/326.0	1.698
246	410.0/478.0	71.21
247	410.0/580.0	2.864
248	415.0/236.0	1.081
249	415.0/256.0	1.312
250	415.0/268.0	1.168
251	415.0/292.0	1.929
252	415.0/302.0	1.672
253	415.0/312.0	1.511
254	415.0/358.0	2.193
255	415.0/368.0	1.957
256	415.0/376.0	2.186
257	415.0/484.0	59.59
258	415.0/550.0	3.941
259	415.0/558.0	4.335
260	415.0/574.0	1.918
261	415.0/586.0	1.931
262	420.0/250.0	1.09
263	420.0/278.0	1.516
264	420.0/298.0	1.472
265	420.0/314.0	1.42
266	420.0/322.0	1.411
267	420.0/330.0	1.381
268	420.0/360.0	1.498
269	420.0/372.0	1.564
270	420.0/492.0	50.05
271	420.0/532.0	5.453
272	420.0/548.0	4.414
273	420.0/578.0	1.538
274	420.0/590.0	1.126
275	425.0/264.0	1.244
276	425.0/284.0	1.476
277	425.0/304.0	1.422
278	425.0/338.0	1.686
279	425.0/352.0	1.485
280	425.0/362.0	1.688
281	425.0/388.0	2.198
282	425.0/498.0	43.35
283	425.0/582.0	2.074
284	430.0/248.0	1.115
285	430.0/268.0	0.902
286	430.0/280.0	1.596
287	430.0/322.0	2.226
288	430.0/342.0	1.656
289	430.0/364.0	1.441
290	430.0/374.0	1.815
291	430.0/382.0	2.107
292	430.0/468.0	7.996
293	430.0/504.0	36.27
294	430.0/568.0	1.925
295	435.0/272.0	0.989
296	435.0/306.0	2.162
297	435.0/318.0	2.061
298	435.0/334.0	2.534
299	435.0/366.0	1.646
300	435.0/510.0	29.15
301	435.0/538.0	4.094
302	435.0/570.0	2.25
303	435.0/584.0	2.42
304	440.0/274.0	1.253
305	440.0/300.0	2.245
306	440.0/344.0	2.978
307	440.0/354.0	2.379
308	440.0/480.0	4.926
309	440.0/488.0	5.109
310	440.0/518.0	26.96
311	440.0/568.0	1.945
312	440.0/580.0	1.59
313	440.0/592.0	1.326
314	445.0/278.0	1.635
Data points
	200	205	210	215	220	225	230	235	240	245	250	255	260	265	270	275	280	285	290	295	300	305	310	315	320	325	330	335	340	345	350	355	360	365	370	375	380	385	390	395	400	405	410	415	420	425	430	435	440
230	24.77	28	117.5	97.89	1239	9999.9	9999.9	6785	65.63	18.91	37.27	53.27	20.02	28.49	21.73	33.14	27.39	17.35	12.4	11.53	33.4	255.5	36.41	3.546	3.507	2.919	1.141	1.617	1.003	1.92	1.132	1.203	0.639	0.963	1.597	1.633	0.726	0.998	0.718	0.291	0.729	0.67	1.034	0.302	0.749	0.177	0.332	0.31	0.303
232	91.16	45.48	118.4	90.64	268.5	9999.9	9999.9	9999.9	405.2	58.38	35.07	33.52	22.87	21.62	13.6	20.76	13.97	11.42	10.68	7.745	8.158	40.92	8.458	4.072	2.61	1.962	1.709	1.744	1.049	1.416	1.179	1.148	0.806	0.679	0.75	1.259	0.505	0.588	0.648	0.58	0.709	0.502	0.456	0.2	0.512	0.438	0.445	0.027	0.397
234	53.97	71.78	166.2	164.6	170.6	6091	9999.9	9999.9	3389	75.2	50.86	41.19	35.21	17.11	18.94	23.79	10.79	13.33	11.05	5.858	6.142	7.912	3.348	3.837	3.076	2.282	3.139	1.684	0.815	0.496	1.093	1.108	0.907	0.752	0.722	1.234	0.87	0.929	0.355	0.666	0.708	0.494	0.747	0.975	0.341	0.809	0.408	0.378	0.253
236	68.24	59.83	142.6	288.4	239	1241	9999.9	9999.9	9999.9	153.2	55.63	39.06	27.93	27.3	25.4	15.52	21.65	12.88	10.61	6.859	4.603	3.471	2.757	3.321	2.84	2.655	2.034	1.815	2.129	0.997	1.895	1.079	0.621	0.663	0.54	1.381	0.565	0.823	0.579	0.564	0.33	0.448	1.021	1.081	0.119	0.356	0.736	0.273	0.759
238	92	122.9	110.1	234	381.7	336.9	9999.9	9999.9	9999.9	1384	68.1	23.78	31.63	28.95	22.7	25.14	17.88	14.87	13.42	8.136	5.763	3.813	4.488	5.574	3.117	2.799	3.583	1.031	1.959	1.239	1.232	1.145	1.272	1.662	1.041	0.629	1.003	0.608	0.26	0.987	0.322	0.535	1.054	0.901	0.269	0.823	0.458	0.425	0.677
240	94.89	83.38	64.56	160	419.4	309	3847	9999.9	9999.9	9165	82	40.08	37.7	25.11	24.32	19.58	14.51	12.52	11.24	8.965	4.645	6.303	4.015	2.155	3.16	1.7	3.097	2.153	1.386	1.079	0.611	0.981	0.777	1.353	0.762	0.642	0.38	1.207	0.658	0.495	0.407	0.627	0.824	0.632	0.584	0.446	0.243	0.47	0.741
242	166.2	50.44	132.8	162.1	486.2	464.8	715.5	9999.9	9999.9	9999.9	530	66.81	35.28	34.2	36.97	15.79	14.4	10.84	9.087	10.83	9.031	6.685	3.068	2.578	3.753	1.8	2.474	2.658	1.846	1.078	1.793	1.881	0.911	0.95	0.95	0.745	0.305	0.842	0.858	0.529	0.526	0.838	0.524	0.72	1.135	0.877	0.52	0.225	0.514
244	83.56	130.3	103.1	187	432	686.5	373.5	9782	9999.9	9999.9	4433	76.33	41.86	45.46	39.62	20	17.7	14.84	10	10.52	5.461	3.039	3.619	2.956	3.994	2.219	1.835	1.878	2.074	2.613	1.678	2.654	1.093	0.851	0.701	0.971	1.069	1.149	0.882	0.53	0.301	0.55	0.373	0.545	0.522	0.665	0.556	0.536	0.493
246	97.55	90.91	126.7	80.13	288	799.5	364.5	2252	9999.9	9999.9	9999.9	202.9	50.56	34.21	36.75	37.02	15.14	15.45	12.28	10.36	6.455	3.17	4.703	3.49	3.148	2.517	1.882	2.088	1.963	1.541	2.199	1.855	1.736	1.98	1.159	1.716	1.24	0.966	1.029	0.752	1.3	0.484	0.633	0.244	0.892	0.727	0.415	0.356	0.245
248	96.34	86.3	59.52	120	169.8	700.7	587.2	485.3	9999.9	9999.9	9999.9	1774	80	45.89	44.34	34.57	23.8	16.27	12.88	10.28	6.692	4.721	4.674	3.869	4.016	3.239	2.156	2.277	2.575	1.957	1.118	2.052	1.24	1.107	1.709	1.204	1.258	0.831	1.204	0.598	0.973	0.212	0.591	0.311	0.705	0.772	1.115	0.307	0.43
250	62.59	82.41	164.5	127.7	135.7	452	858	305.2	4913	9999.9	9999.9	9774	106.6	61.93	47.91	37.7	29.04	17.81	11.81	11.97	10.18	7.946	5.471	3.922	5.217	2.877	3.201	2.297	2.177	1.926	1.887	1.153	1.548	1.521	1.642	1.257	1.169	0.804	0.597	0.587	0.337	0.466	0.782	0.489	1.09	1.029	0.986	0.289	0.312
252	79.85	156.3	91.47	125.2	121	268.9	969	460.4	948.9	9999.9	9999.9	9999.9	644.2	73.74	59.41	30.65	28.78	21.17	15.31	11.62	7.838	7.211	5.714	4.749	3.892	3.593	2.509	1.892	2.683	1.254	2.284	0.836	1.497	1.417	1.258	0.615	1.069	1.477	1.189	0.558	1.032	0.559	0.34	0.167	0.589	0.645	0.453	0.198	0.829
254	64.89	155.8	77.34	149	198.7	166.9	845.5	748.1	305.5	9999.9	9999.9	9999.9	4344	84.69	56.09	45.91	34.85	20.7	15.29	7.724	13.34	5.537	5.104	4.991	3.401	3.085	4.11	3.101	2.354	1.252	2.433	1.168	1.034	0.691	0.526	1.386	1.186	0.845	0.961	0.808	0.545	0.647	0.721	0.861	0.552	0.725	0.359	0.541	0.551
256	195.1	141.1	209.9	174.3	112.7	80.18	535.5	937.8	318.7	2606	9999.9	9999.9	9999.9	171.4	66.03	52.25	31.48	23.37	16.11	16.67	9.022	7.467	8.322	5.027	3.926	3.992	4.232	2.832	2.584	1.861	1.772	2.078	2.371	2.261	1.937	1.369	1.222	1.219	0.852	0.592	0.321	1.51	0.763	1.312	0.797	0.911	0.605	0.966	0.784
258	123.6	105.4	136.2	217.1	132.9	147.2	305.6	1053	502.6	528.7	9999.9	9999.9	9999.9	1606	95.89	45.93	42.2	19.72	19.79	15.6	10.64	8.903	4.701	5.56	4.504	5.239	2.51	2.724	2.754	1.358	3.244	2.282	2.139	1.26	1.663	1.169	1.013	1.272	0.915	0.924	1.484	0.779	0.859	0.705	0.718	0.493	0.89	0.484	0.598
260	113	230.3	136.8	134.4	89.31	164	199.5	768.5	793.4	286.6	6007	9999.9	9999.9	9550	93.58	63.01	40.58	34.29	25.9	15.84	10.49	7.565	6.614	4.491	4.699	3.92	3.594	3.098	2.991	2.612	2.979	1.864	1.431	1.562	1.945	1.521	0.515	1.527	0.651	1.276	0.944	0.535	0.636	0.675	0.775	0.838	0.625	0.75	0.666
262	129.9	150.4	172.9	180.2	125.1	133.7	114.1	492.6	1064	339.3	1147	9999.9	9999.9	9999.9	575.7	71.55	52.66	31.64	26.16	12.26	12.1	11.54	4.726	5.339	5.109	3.638	3.638	2.667	2.731	2.076	2.344	1.949	1.785	1.298	1.615	1.103	1.025	1.042	1.228	1.393	1.045	1.193	0.644	0.521	0.487	0.476	0.802	0.751	0.373
264	65.81	125.1	84.63	134.9	186.1	96	140.1	303	1212	606.2	327	9999.9	9999.9	9999.9	4210	86.79	55.16	42.92	28.93	15.28	16.56	9.411	7.819	6.001	3.913	3.712	4.208	4.258	3.884	2.095	2.674	2.565	2.166	2.575	1.232	1.499	1.006	1.012	1.254	1.063	1.085	1.053	1.216	0.467	1.088	1.244	0.742	0.885	0.95
266	291.8	229.2	93.06	156.7	117	150.1	100.2	175.4	850	990.8	250.7	2842	9999.9	9999.9	9999.9	176.1	67.96	40.46	31.12	19.55	15.19	14.37	8.306	7.962	5.247	3.546	3.114	3.561	3.253	1.768	2.572	2.376	2.192	1.961	1.361	1.976	0.894	1.52	1.005	1.828	0.949	0.885	1.424	0.686	0.784	1.042	0.638	0.419	0.264
268	127.8	171.3	72.03	142.7	150.3	143.6	114.7	109.3	537.6	1269	353.4	552.6	9999.9	9999.9	9999.9	1544	72.4	48.84	38.52	21.33	12.2	12.17	8.043	6.022	5.544	5.334	4.397	3.831	2.408	3.085	2.388	1.987	2.01	1.788	2.436	1.05	1.327	1.222	1.029	2.512	1.64	0.929	0.715	1.168	0.353	0.633	0.902	0.687	0.549
270	114	217.4	147.4	143.9	152.2	130.5	107.9	63.28	222.1	1295	634.4	217.5	6783	9999.9	9999.9	8186	102.5	59.08	32.84	24.88	20.25	14.07	11.82	6.44	8.383	4.898	3.981	4.545	3.609	2.636	2.429	2.268	2.153	2.476	1.261	2.071	1.537	1.268	1.601	1.777	1.506	1.247	0.811	0.954	0.978	0.666	0.399	0.849	0.716
272	159.5	136.2	158.9	194.4	195.2	177.4	150.4	100.9	146.5	1013	1110	236.7	1328	9999.9	9999.9	9999.9	478.7	61.08	35.35	29.47	19.58	11.4	12.46	7.034	5.25	4.948	4.488	3.362	2.538	3.008	3.075	2.298	2.29	1.704	2.65	1.377	1.246	1.635	1.193	1.021	1.304	1.56	0.915	0.624	0.971	1.109	0.499	0.989	0.972
274	179	112.7	153.4	164	209.1	110.3	100.6	89.93	73.48	620	1490	381.7	333.8	9999.9	9999.9	9999.9	3268	80.19	43.97	33.32	20.36	14.18	11.14	8.451	8.537	4.606	5.414	4.564	3.745	5.027	2.267	2.055	2.983	2.321	1.816	1.643	1.634	1.949	1.1	1.406	1.138	1.544	0.695	0.855	1.002	0.932	0.753	0.686	1.253
276	204.2	143.7	234	248.1	290.1	185	140.7	92.75	70.92	287.3	1372	681.1	214	3157	9999.9	9999.9	9999.9	173.1	54.3	35.19	20.23	14.43	13.8	8.076	6.677	4.859	4.539	5.616	4.647	3.199	2.651	2.392	2.575	1.753	1.243	2.07	1.408	1.963	0.931	1.498	1.851	1.138	1.517	0.501	1.135	0.707	0.76	0.865	1.029
278	149.8	204.7	188.2	158.1	226.4	260.7	132.7	84.09	76.31	144.7	1044	1230	238.5	670.3	9999.9	9999.9	9999.9	1033	54.2	34.45	19.29	17.15	12.4	7.174	8.818	6.358	5.543	3.126	4.154	2.672	3.387	2.094	1.944	1.88	2.913	1.517	2.137	2.506	1.286	1.162	1.527	0.943	1.515	1.108	1.516	1.329	1.382	0.242	1.251
280	281	230.8	204.8	179.8	325.5	264.5	176.2	77.62	72.55	96.86	585.7	1564	433.2	286.4	7355	9999.9	9999.9	5585	75.72	37.04	29.21	17.54	14.08	11.51	6.808	6.571	4.814	3.808	4.279	4.172	2.847	2.242	1.986	2.459	2.963	2.512	3.07	1.764	1.48	0.818	1.845	1.619	1.75	1.373	1.161	1.168	1.596	0.952	1.042
282	199.2	190.4	150.9	238.6	425.8	269.4	187.3	126.4	77.37	92.43	352.8	1570	865.2	280.2	1673	9999.9	9999.9	9999.9	324	47.77	31.75	22.75	13.72	10.49	9.291	5.804	4.487	4.738	3.507	2.753	3.895	2.945	3.189	1.689	2.293	2.585	3.452	1.808	1.218	2.223	2.174	1.616	1.24	1.252	1.43	1.373	1.384	1.081	0.94
284	211.2	173.5	187.3	392.2	415.9	372.8	187.8	86.4	95.68	109.9	174.4	1276	1485	351.6	576.3	9999.9	9999.9	9999.9	1916	53.52	29.67	22.94	14.75	11.93	7.722	6.826	7.943	4.021	3.797	2.696	3.754	2.086	3.479	2.219	1.873	2.719	2.117	2.052	1.213	1.086	1.389	0.91	0.853	1.116	0.939	1.476	1.052	1.077	1.626
286	308.8	87.68	234.9	276.9	581.2	500	290.6	105.2	94.93	66.19	141.2	738.4	1837	607.5	485.1	3458	9999.9	9999.9	8658	118.1	40.09	26.47	15.4	12.41	8.672	6.78	6.635	4.296	7.187	5.911	2.964	3.521	3.487	2.744	2.407	2.594	1.567	1.676	0.991	1.278	1.383	1.646	1.353	1.523	0.984	0.791	1.117	0.854	1.462
288	392.9	107.9	211.9	353.3	555.1	536.8	335.2	159.7	80.15	97.74	138.6	406.8	1853	1031	489.2	945.4	9999.9	9999.9	9999.9	682.2	45.02	34.51	17.88	14.13	8.662	7.659	6.637	6.825	5.562	4.381	3.839	3.86	2.869	3.504	2.605	2.519	1.669	1.836	1.771	1.237	1.78	0.687	0.987	1.372	1.166	1.139	0.995	1.309	1.307
290	185.8	220.4	159.5	400	522.4	721.9	292.5	162.7	99.01	129.8	159.5	260.4	1495	1687	602.4	602.3	6775	9999.9	9999.9	3501	57.59	29.9	22.12	13.36	9.58	8.255	7.892	6.712	5.476	4.465	3.129	2.814	2.012	2.352	2.28	2.559	1.702	1.492	1.992	1.272	1.522	1.079	1.42	1.032	1.069	0.841	0.919	1.175	1.298
292	275	180.7	164.7	373.7	586.9	572	392.8	188.6	100.7	116	192.1	293	907.8	2264	867.9	557.9	1782	9999.9	9999.9	9999.9	197.8	32.08	22.95	16.73	13.81	10.35	9.691	6.519	2.827	5.049	3.742	3.543	2.776	2.681	2.05	1.911	1.915	0.776	2.137	1.428	1.603	1.012	1.333	1.929	0.643	1.069	1.39	1.055	1.606
294	231.2	138.8	117.7	373.7	501.9	751	450.7	215	125.4	147.1	205.2	266.1	643.1	2254	1337	640.9	682.1	9999.9	9999.9	9999.9	1177	35.6	22.79	20.32	13.78	8.37	7.403	6.296	6.009	4.739	3.683	3.576	3.147	2.55	2.114	2.131	1.927	1.864	1.547	1.389	1.202	1.362	1.294	1.814	0.737	0.968	1.185	1.44	1.194
296	145.8	150.5	222.8	394.9	596.2	902.6	580.6	193.4	147.1	168.3	187.5	264.7	483.6	1818	1981	723.4	553.1	3125	9999.9	9999.9	5716	62.91	29.77	19.99	14.54	11.19	9.119	5.565	4.371	5.467	3.719	3.935	3.599	2.558	1.876	1.549	2.371	2.166	1.603	1.865	1.566	1.085	0.94	0.752	0.805	0.838	1.452	1.444	1.948
298	256.2	201.1	149.7	405.9	768.7	744.7	544.6	282.7	175.7	175.7	231.9	272.6	388.5	1260	2440	940.7	556.3	785.2	9999.9	9999.9	9999.9	381.3	38.79	18.08	14.71	9.632	8.529	5.474	4.603	6.625	3.563	3.254	3.274	2.621	1.86	2.201	1.656	2.088	1.042	1.592	1.493	1.327	0.793	0.972	1.472	1.23	1.055	1.556	1.832
300	221	254.4	204.4	408.3	626.7	1005	511.6	337.3	208	176.7	241.1	304.6	419.2	884.3	2473	1385	562.7	425.8	4966	9999.9	9999.9	2155	38.6	25.95	16.69	11.73	8.369	6.68	6.521	5.214	3.065	2.801	2.948	2.731	2.055	2.845	1.363	1.79	1.954	1.281	0.866	1.45	1.535	1.079	0.995	1.039	0.874	1.055	2.245
302	113.4	168.6	147.1	470.6	804.1	969.2	524.8	271.9	211.2	224.6	258	297.4	450.8	704.4	2064	2052	642.5	396.4	1178	9999.9	9999.9	9131	109.7	28.14	16.34	14.52	9.565	7.079	6.892	5.692	5.552	3.655	4.687	2.784	2.597	3.336	2.303	1.665	1.778	1.752	1.659	0.76	0.989	1.672	0.665	1.147	0.359	1.455	1.636
304	122.2	173.7	175	295.5	704	901.8	603.1	341.8	194.4	229.5	298	368.9	486.6	669.2	1443	2537	842.2	397.9	379.3	7430	9999.9	9999.9	748.5	26.46	21.73	15.29	10.37	7.798	7.519	5.374	3.486	4.028	3.248	3.801	2.938	3.234	1.346	1.666	1.784	1.974	1.27	1.053	1.246	1.014	0.855	1.422	0.829	1.627	1.618
306	129.9	151.3	139.1	296.2	744.7	873.3	588.9	401.9	283.9	270.1	294.9	307	563.7	687.2	1099	2550	1256	418.1	278.7	1946	9999.9	9999.9	3976	39.87	19.78	15.11	11.74	9.266	6.022	5.156	4.5	3.489	4.2	4.875	1.824	3.365	2.078	1.584	1.141	1.232	1.115	1.103	1.268	0.988	1.002	1.01	1.201	2.162	1.012
308	312.9	179.5	194.7	395.7	662.3	861.8	697.2	414.2	280.2	276.3	297.3	398.4	569.6	713	940.5	2166	1824	465.8	267.1	447.3	9999.9	9999.9	9999.9	215.4	23.1	17.34	11.99	8.207	7.056	5.935	4.005	5.228	4.065	2.597	2.345	2.564	2.149	2.337	0.991	2.012	1.329	1.023	0.635	1.173	1.162	1.06	1.063	1.224	1.124
310	256.2	173.1	229.3	380.8	773	931.4	716	439.7	276.4	286.9	317.8	432.9	584.3	749.6	885.1	1594	2318	659.8	289.2	213	3339	9999.9	9999.9	1549	25	17.18	12.3	10.28	8.176	5.74	4.183	3.945	3.136	3.385	1.745	3.338	2.951	2.621	1.887	1.661	1.15	0.754	1.453	1.127	1.311	1.064	1.079	1.537	1.52
312	246.1	137	294.5	376.8	757	1033	783.1	462.5	321.2	303.2	365.8	474	645	817.6	938.6	1185	2384	1038	316.8	197.6	707.1	9999.9	9999.9	6474	79.24	21.91	11.5	9.725	8.896	6.88	4.204	4.849	3.022	3.173	2.495	2.117	2.33	1.945	1.279	1.219	1.238	1.08	1.218	1.511	1.142	1.298	1.171	1.644	1.856
314	172	58.24	188.6	371.5	777.1	898.7	674.3	486.5	332.2	353.3	399.1	555.4	700.5	808	983.7	1049	1960	1536	390.9	199.4	221.4	5172	9999.9	9999.9	563.6	26.84	15.93	10.71	8.978	6.115	6.598	3.747	4.602	2.955	3.313	3.121	2.598	2.271	2.293	1.366	0.851	1.452	1.125	0.838	1.42	1.034	1.694	1.204	1.71
316	128	139.3	161.2	374	873.4	855.7	709.8	502.8	341.5	374.6	469.2	610.1	770.1	882	1006	1000	1522	2058	546.3	209.3	152.7	1294	9999.9	9999.9	2942	34.94	18.43	11.53	9.322	6.963	4.952	5.32	3.131	2.778	2.796	3.167	2.073	2.711	1.742	1.36	1.295	1.696	0.981	0.841	1.17	0.965	0.906	1.003	2.315
318	247.8	202.9	337	443.4	1037	905.5	845.1	558.2	371.4	405.4	507.4	663.9	822.9	974	1034	1072	1165	2135	843.5	237.1	148.2	287.7	7910	9999.9	9551	179.9	20.73	15.31	10.23	6.513	5.535	4.917	5.628	3.463	2.521	3.708	2.9	2.429	1.653	1.282	1.06	1.401	0.568	0.817	0.703	1.892	2.009	2.061	1.755
320	275.5	169.9	240.4	518.2	1087	1041	834.4	555.2	418.7	429.6	551.2	752.1	853.7	1045	1147	1128	1062	1834	1294	286.9	149.4	139.4	2517	9999.9	9999.9	1240	26	14.76	8.181	8.991	6.618	4.76	4.132	3.892	3.035	2.164	2.894	1.199	2.265	1.205	1.338	1.234	0.901	0.877	1.162	1.23	1.454	1.746	2.001
322	86.74	149.9	189.8	620.4	976.8	1219	816.5	598.7	404.7	453.8	539.7	734	945.2	1160	1210	1181	1017	1376	1670	429.3	159.9	115.5	518.5	9999.9	9999.9	5152	61.89	15.73	11.09	8.008	5.829	4.677	4.564	3.573	2.796	2.684	2.717	2.447	1.792	1.861	1.764	1.012	0.996	0.576	1.411	0.99	2.226	1.157	2.109
324	129.8	168.9	150.7	528.4	1377	1166	842.5	577.2	438.2	503	633.4	806.4	1017	1194	1250	1191	1016	1038	1818	698.2	180.9	110.9	160.5	4079	9999.9	9999.9	540.9	20.89	13.14	9.327	7.726	6.066	6.004	3.757	3.418	2.566	1.906	2.119	1.33	1.231	1.414	1.116	1.229	0.799	0.909	0.607	1.062	1.772	2.089
326	102.9	228.8	238.7	558.8	1171	1211	793.9	640.4	473.8	484.2	635.4	798.6	1020	1196	1341	1233	1038	895.1	1561	1011	208.8	117.8	97.59	1000	9999.9	9999.9	3155	26.04	13.63	9.284	7.869	6.277	3.359	4.198	2.487	1.989	2.308	1.808	1.448	2.131	1.569	1.092	1.698	1.632	0.878	0.934	1.032	1.277	2.104
328	230.8	148.8	234	588.1	1180	1381	949.7	560	456.6	452.1	682.9	907.9	999.1	1192	1307	1280	1077	844.7	1186	1322	304.7	110.8	96.71	227.2	5650	9999.9	9807	165.3	14.96	11.14	7.605	7.682	5.773	3.879	3.271	3.186	2.518	1.537	1.418	1.578	1.338	0.679	1.337	1.298	1.095	1.087	1.089	1.291	2.476
330	92.08	131	134.1	587	1321	1413	940.1	608.2	463.7	508.5	684.4	887.8	1015	1218	1278	1244	1093	857	818.4	1429	527.1	124.1	80.56	96.56	1729	9999.9	9999.9	1300	21.15	9.474	7.785	5.779	4.632	4.619	4.176	3.05	2.103	3.004	1.7	1.549	1.339	1.324	0.853	1.187	1.381	1.23	1.5	1.607	2.6
332	139.6	110.9	251.3	542	1357	1200	939.3	601.3	492.4	510.1	695.3	850.5	1095	1222	1344	1279	1082	841.1	655.7	1211	775.6	130.6	86.24	74.38	363.7	7567	9999.9	5149	51.03	12.15	8.456	8.189	5.822	5.34	4.748	2.699	2.428	2.353	1.874	1.572	1.041	1.111	0.967	0.997	1.133	0.542	1.512	1.839	2.236
334	200.5	206.4	148.9	599.7	1310	1250	925.4	621.5	484.3	550.7	674.9	833.7	1089	1236	1337	1268	1071	855.2	612.3	911.7	1026	216.7	97.48	67.5	110.5	2913	9999.9	9999.9	480.9	15.37	9.842	7.534	6.241	5.054	3.603	4.308	3.79	2.444	1.741	1.739	1.299	1.008	1.185	0.654	1.106	1.133	1.098	2.534	1.744
336	83.22	79.8	166.7	488.2	1315	1227	859	587.1	483.5	582.8	658.3	849.7	1051	1232	1316	1273	1036	859.9	594.2	597	1170	370.3	92.17	63.86	74.01	683.7	9870	9999.9	2752	20.98	12.25	8.15	5.772	5.36	4.527	2.652	2.577	2.811	1.587	1.498	1.021	0.972	0.571	0.838	1.087	1.283	1.136	2.169	2.137
338	204.4	92.93	242.5	610.6	1091	1229	816.1	596.1	444.2	497.6	683.7	807.8	1036	1237	1224	1264	1071	834.7	576.9	461.3	1016	615.5	110.2	69.93	60.46	148	4232	9999.9	8293	128.8	11.88	9.576	5.706	5.221	3.984	3.616	2.336	2.408	2.44	1.094	1.767	1.056	0.954	1.039	0.876	1.686	1.602	1.302	2.036
340	203.1	79.97	146	522.5	1266	1314	917	509.9	475.5	547.6	640.1	844.7	1031	1201	1223	1247	1050	806.4	575.1	389.8	708.2	866.7	164.5	70.32	60.24	62.48	1228	9999.9	9999.9	1129	15.95	8.512	8.138	4.963	4.904	3.759	2.667	2.174	1.793	2.566	1.26	1.321	1.329	1.239	1.089	0.798	1.53	1.409	2.754
342	194.1	119.3	168.1	411.4	1136	1252	978.6	618.3	400.8	456.3	600.9	769.8	979.8	1116	1266	1160	1003	776.2	571.2	358.8	423.3	977.5	299.9	76.68	64.68	49.54	252.6	5620	9999.9	4691	38.26	13.26	9.578	5.193	5.41	5.072	2.402	2.798	2.201	1.527	2.067	1.561	1.393	1.117	1.125	0.803	1.656	1.321	1.855
344	101.5	175.6	174.9	425	1077	1023	888.3	567.3	451.2	426.8	579.9	772	909.2	1083	1172	1076	964.9	743.7	569.3	322.3	295.9	841.9	488.8	70.71	56.31	46.83	79	1877	9999.9	9999.9	351.7	13.45	9.482	5.201	6.32	5.347	3.954	2.864	2.115	1.548	1.412	1.487	1.053	0.883	1.074	0.784	1.306	1.104	2.978
346	223.7	56.18	191.3	398.7	937.7	1105	762.7	559.7	446.3	440.8	564.2	760	876.7	1053	1158	1091	918.5	741.5	540.8	333.4	230.6	615.2	724.6	127.4	52.58	51.32	49.76	415.2	7481	9999.9	1992	18.78	7.931	5.123	5.348	4.845	3.375	2.206	1.475	1.056	2.1	1.448	0.756	0.838	1.161	0.927	1.273	1.858	2.021
348	206.1	115.1	98.43	410.4	839.5	956.8	780.2	472.4	411.8	395.1	545.4	738.1	876.2	1004	1056	1028	883.7	749.4	547	331.2	201.4	393.2	819.3	247.4	62.13	51.73	48.67	104.5	2933	9999.9	5929	108.7	10.76	5.003	6.337	3.37	3.377	2.696	2.472	1.262	2.506	1.641	0.764	0.93	1.191	1.359	1.112	1.2	2.377
350	112.2	86.1	99.5	369.7	879.6	951.2	841.5	545.1	369.5	413	558.6	665.2	798.3	892.3	1038	1040	841	722.1	506.8	322.7	192.8	243.3	766.5	412.5	67.48	53.33	45.51	52.79	747.8	9999.9	9999.9	952.4	12.29	7.683	7.095	3.764	2.391	2.614	2.07	1.552	1.781	1.005	1.33	1.867	0.885	0.864	1.211	1.277	1.826
352	103.9	67.07	157.2	372.9	947	988.1	778.9	499.3	352	408	502.5	667.4	749	916.7	967.2	956.4	843	702	521.4	310.9	191.4	173.6	566.3	621.8	117.7	53.61	47.72	45.1	153.1	4640	9999.9	3964	37.27	8.794	6.598	4.232	2.721	2.63	2.213	1.921	1.86	1.719	0.718	1.268	1.114	1.485	1.007	1.159	2.081
354	114.3	156.4	98.69	400.5	741.8	850.9	640.9	456.5	382.4	358.8	461.1	621.7	731.7	852.7	930.9	907.6	802.1	664.7	490.4	307.1	186.7	149.9	336.8	743.4	200.7	53.75	48.81	43.19	60.41	1339	9999.9	9536	330	10.16	7.272	7.087	3.359	2.647	2.736	2.155	1.922	1.488	1.63	1.26	0.877	1.155	1.226	1.364	2.379
356	54.13	78.63	102.2	351.5	626.3	746.5	744.1	428.9	371.9	375.4	428.6	583.5	739	830.5	900.4	878.5	799.8	652.1	482.6	294.1	179.2	145.7	206.3	690.9	352.8	71.29	48.55	39.41	39.2	276.8	6010	9999.9	1891	15.65	7.549	5.283	3.554	3.422	2.977	2.493	2.448	0.819	1.465	1.488	1.168	0.967	1.027	1.916	2.219
358	133	118.7	117.1	316.9	819.8	684.4	639.7	495.9	367	381.1	426.8	516.6	659.2	784	815.7	790.2	752.5	589.1	464.5	268.2	179.4	139.4	158.8	520.3	555.5	107.6	50.78	44.38	38.87	71.87	2160	9999.9	5928	90.16	8.911	4.987	3.913	3.007	3.568	2.23	2.206	1.58	1.35	2.193	1.084	1.24	0.748	1.123	1.426
360	125.1	88.03	163.4	284	638.7	769.8	492.6	448	297.5	340.6	404.8	526.8	657.3	718.8	778.5	824.4	688.7	545	468.6	288.1	199	145.6	128.6	349	676.8	185.7	52.91	45.07	39.41	39.34	528.5	9001	9999.9	801.3	12.4	6.765	4.505	3.974	2.35	2.312	1.571	2.137	1.154	1.455	1.498	1.28	1.016	1.582	1.739
362	135.7	138.6	204.9	250.3	580.3	744.4	637	429.8	283.1	354.6	423.3	523.8	600	668.3	747.1	785.7	650.6	547.3	414.2	264.6	185.9	149.5	126.3	212.5	638.3	309.1	62.42	43.21	41.74	31	114.4	3994	9999.9	3435	28.49	9.624	5.333	4.352	3.499	1.866	1.862	1.555	1.208	1.573	1.186	1.688	1.252	1.455	1.959
364	73.15	139	88.67	202.9	608.3	671.7	609.6	405.5	323.1	337.4	357.2	505	552.8	595.2	711.7	697.4	648.9	538.3	404.4	262.5	172.8	149.4	118.9	146.4	515.1	479.3	99.74	44.14	40.15	30.1	43.6	1176	9999.9	8294	295.6	12.17	5.667	5.316	3.73	3.003	2.513	1.785	1.527	1.458	1.19	1.38	1.441	1.385	1.324
366	192.5	106.5	109.5	286.6	582.4	760.7	550.8	359.8	290.6	296.5	362.7	459	513.6	608.5	645.1	690.2	599.1	515.4	390.7	281.6	177.2	149.6	122	123.7	347.9	600	165	44.89	41.64	32.39	32.9	237.2	5999	9999.9	1805	14.43	6.352	5.162	3.485	3.26	2.107	1.913	1.578	1.182	0.601	1.485	1.399	1.646	1.285
368	119.7	137.4	121.4	267.4	482.8	740.8	473.8	335	257.1	288.5	336.8	402.6	503.4	570.3	634.3	631.4	617	482.7	380.6	272.9	184.1	147	129.4	124	203.4	603.6	275.6	59.07	42	32.56	28.59	62.43	2138	9999.9	5652	93.77	7.559	5.264	3.238	2.847	2.501	1.771	1.661	1.957	0.984	1.171	0.919	1.368	1.818
370	237.5	88.08	80.28	298.2	490.5	690.7	508	349.3	324.5	308.2	329.9	367.6	526.4	572.8	604	576.6	554.1	467.4	379.4	249.2	180.5	141.4	127.7	126.4	141.4	484	410.9	76.01	41.17	33.48	28.2	31.78	505.8	8414	9999.9	775.3	10.55	4.661	4.695	2.584	1.86	2.319	1.246	1.381	1.121	1.388	0.896	0.655	0.677
372	223.3	240.8	121.3	278.3	417.8	570.3	410.2	297.7	257	274.1	328.5	336.7	458.1	501.6	546.9	570.4	525.8	455.8	354.6	253.6	174.4	159.1	131.3	108.2	119	328.8	519.2	129.6	40.76	31.83	29.56	24.16	103.9	3664	9999.9	3204	22.96	7.104	3.285	3.056	2.242	1.743	1.83	1.174	1.564	1.079	1.176	0.851	1.654
374	145.6	120.2	101.7	273.3	362.8	539.1	440.6	343.9	299.6	287.5	302.4	303.7	409.9	455.7	512.6	522.8	481.7	420.3	320.3	234.2	177.9	146.7	143.3	118.3	122	201.4	543.4	232.1	44.66	35.14	29.45	23.21	37.45	1075	9999.9	7738	256.2	7.157	4.234	3.232	3.34	2.229	1.819	1.834	0.567	1.668	1.815	1.677	1.502
376	144.3	100.4	94.68	208.2	315.9	483.4	491.4	335.4	276.7	238.1	295.3	342.1	415.5	447.7	510.5	509.8	438	387.5	328.6	239.6	173.6	144.5	135.3	121.8	112.9	133.4	441.1	363.6	66.25	36.82	27.48	25.08	27.95	220.9	5684	9999.9	1604	10.92	7.101	2.469	2.769	1.491	1.844	2.186	0.854	1.506	1.006	0.798	1.65
378	101.3	102.3	131.4	152.7	408.1	435.3	380.3	323.1	267.3	260.2	295.6	347.2	384.9	444.8	469.5	501.6	458.1	364.7	314	224.8	180.2	148.1	130	121.6	109.7	116.4	320.5	441.2	105.2	34.27	26.68	24.11	22.73	54.14	1983	9999.9	5072	76.29	5.631	3.9	2.97	2.175	2.456	1.879	1.641	1.34	1.117	1.091	1.525
380	84.34	80.51	84.05	221.7	342	462.7	403.4	307.3	288.2	226.3	286.9	353.6	350.7	413.2	446.1	458.5	420.3	347.8	290.7	216.8	190.7	151	133.6	126.4	110.5	98.92	197.6	477.7	190.9	37.36	26.8	27.94	22.61	24.7	459.7	7646	9695	650.5	5.682	4.734	2.816	2.536	1.802	2.059	1.092	1.637	1.383	1.343	1.235
382	121.3	118.3	88.19	178.9	442.3	453.5	382.9	283.5	258.7	247.1	247.8	277.3	318.6	338.7	391.6	402.4	387.9	340	308.9	238.3	190.3	151	146.5	121.9	115.1	98.02	136.7	403.7	288.4	45.59	29.23	25.28	23.64	20.2	91.03	3295	9999.9	2791	20.66	4.678	3.007	3.053	1.663	1.58	1.632	1.5	2.107	0.848	1.52
384	158.2	232.7	160.3	238.2	377.8	408.2	393.7	290.1	221.3	229.7	275.7	286.8	316.5	319.9	363.7	409	354.4	343	291	214	185	152.8	144.7	130.3	115.6	93.37	96.84	291	380.6	90.38	28.13	22.76	22.05	22.9	32.18	943	9486	6715	235.1	5.33	3.261	3.146	1.76	1.337	1.953	1.808	1.231	1.431	1.473
386	97.78	99.48	76.03	184.6	333	390.7	330.9	310.7	233.2	230.4	254.8	275.4	307.9	334	323.3	375.4	355.2	325.6	290	201.3	171.8	146.7	133	119.4	116.4	96.86	87.93	186.1	427.8	150.7	34.18	24.29	23.56	24.19	22.7	188.5	5028	9999.9	1380	10.59	5.222	2.809	2.612	1.611	1.058	0.976	1.375	1.126	1.364
388	127.5	82.02	50.45	182.6	295.4	356.1	389.8	265.1	278.5	230.6	245.5	271.4	268.2	359.7	319.9	349	349.4	335.5	268.1	213.5	176.5	161.5	134.9	122	112.4	100	87.65	126.3	379.7	237.6	42.69	26.61	24.58	20.86	20.06	48.18	1709	9999.9	4334	62.09	5.725	3.496	2.562	2.084	2.105	2.198	1.129	1.367	1.404
390	476.5	55.31	116.3	187.5	289.7	321.7	301.9	238.9	216.9	225.4	233.8	263.5	281.8	295.7	328.4	335.8	312.2	269	253.3	210	178	160.9	144	122.6	113.9	98.95	78.59	88.12	283.6	329.5	70.17	27.61	22.41	23.17	19.22	27.62	400.5	6850	8316	540.2	6.308	4.561	2.45	1.76	2.422	1.374	1.13	1.417	1.258
392	1295	50.95	74.07	261.6	341.7	327	322.1	231.5	243.9	217.4	245	280.9	262.4	261.7	294.9	316.8	287.7	286.3	247.5	197.8	171.7	161	146.8	122	110.7	97.05	81.48	78.72	186	363.8	126.4	29.72	24.07	25.2	22.47	19.54	80.17	2888	9999.9	2484	17.5	5.245	2.971	2.398	1.678	1.147	1.311	1.196	0.916
394	2218	68.56	154.5	193.1	311.3	297.3	360.6	255	227.1	207.5	239.9	245	240.8	240.9	282	298.2	301.3	270.2	231.1	198	173.6	148.1	151.2	124.8	110.5	100.4	86.47	74.68	117.5	335.9	207.9	42.19	26.17	21.03	21.21	19.39	29.86	805.9	8516	6064	205.7	6.062	3.098	2.485	1.732	1.543	1.163	1.561	1.375
396	3351	181.1	118.2	159.9	301	232	354	229.7	217.6	214.4	245.4	249	233.4	261.8	266.5	265.5	295.2	253.2	233.9	190.2	163	156	139.2	120	118.4	101.6	85.4	72.45	73.72	264.7	286.5	63.21	28.39	23.62	23.92	20.97	20.74	164.4	4528	9512	1257	7.357	4.549	2.767	2.655	1.799	1.42	1.607	0.77
398	3843	269.7	137.2	218.2	350.2	357.7	315.6	263.9	220.6	201.5	208.4	216.9	238.9	242.9	238.2	269.8	273.5	248.7	222.2	189.8	177.9	150.5	138.3	125.7	112.2	99.95	84.86	78.24	63.4	181.9	325.1	98.4	33.57	28.19	23.9	20.69	18.54	41.59	1564	9705	3995	47.95	4.856	2.869	1.955	2.455	1.328	1.426	1.47
400	4492	677.2	133.8	205	267.4	345.5	304	237.6	234.5	209.6	215.9	224.5	218.3	243.8	240.6	250	256.4	242.3	216.7	188.9	165.8	146.1	147.4	121.6	110.9	101.7	88.85	65.54	63.1	115.8	309.9	174.5	36.72	27.26	22.49	23.23	19.02	20.23	356.8	6367	7811	504.9	5.653	3.566	2.344	2.206	1.778	1.28	1.531
402	4296	1877	173.7	249.4	236.9	321.2	212.3	219.6	263.2	268.1	213.4	226.1	215.9	236.2	240.6	218.3	233.9	225.7	212.9	176.2	167.3	144.5	132.6	115.2	107.3	100.8	89.22	71.1	67.5	76.89	243.5	254.9	56.82	25.89	26.41	23.5	19.51	18.41	72.21	2565	9690	2226	15.83	4.52	2.6	2.365	1.549	1.548	1.638
404	3522	2836	105.1	215.7	138.4	264.8	168.9	237	209.5	206.7	243.3	243.8	219.7	202.4	228.8	218.9	195.6	219.8	192	162.2	160.1	139	130.5	113.5	112.6	95.69	90.34	80.86	64.1	68.65	171.3	300.3	96.19	32.48	27.2	25.93	20.02	17.66	27.44	701.2	7636	5440	175	5.787	3.271	2.344	2.281	1.395	1.479
406	2574	3660	173	91.39	251.2	262.2	259.6	248.2	231.1	223.1	212.1	210.4	228.4	214.7	217.2	216.1	214.4	208.6	190.6	167.3	143.6	135.7	129.7	117.1	112.7	97.38	92.37	78.51	67.17	63.43	119.2	299.5	158.4	38.01	27.88	27.22	21.9	19.89	21.25	141.5	3959	8482	1113	7.275	3.065	3.608	2.064	1.689	1.597
408	1582	4915	381.6	102.4	238.6	208.1	232.8	231	184.9	205.6	230.7	198	235.7	222.9	217.1	195.3	184.9	204.6	182.6	172.4	140.9	137	131.9	115.6	105.1	94.62	92.78	73.04	62.57	63.66	85.85	251.2	228.9	48.42	34.26	30.33	24.41	17.87	16.77	35.55	1312	8545	3542	56.31	3.859	2.816	1.74	1.655	1.469
410	914.3	5306	1064	113.6	256.5	244.3	216.9	211.5	193.1	171.6	209	195.8	189.3	194.7	211.1	214.5	185.7	188.3	178.2	156.6	145.4	128.7	138.5	106.7	108.4	99.99	92.38	77.15	61.41	59.82	70.83	184.2	273.4	82.04	36.59	31.76	24.81	21.21	17.28	19.48	294.1	5597	6876	493.2	4.168	2.916	2.532	1.872	2.074
412	428.9	5205	1888	91.28	174.3	196.2	310.8	224.2	210.5	182.2	170.9	173.6	196.5	190.6	184.5	191.1	164.7	187.9	164.4	135	136.6	122.6	122	110	104.6	99.49	89.45	80.28	71.23	63.01	58.22	124.8	280.6	139.1	40.78	31.55	29.04	21.51	17.04	16.46	59.79	2391	8578	2102	14.79	3.235	2.174	2.06	1.999
414	220.8	3949	2867	221.3	176.5	223.5	222.8	204.3	188.8	206.2	162.5	195.8	207.2	171.1	185.5	170.2	186.2	160.3	134.4	156.1	130.9	134.9	101.9	109.8	98.81	94.4	84.02	79.68	74.9	63.5	63.57	94.33	251.4	201.7	56.91	31.18	29.75	23.8	18.63	15.59	23.93	680.7	6980	5030	173.8	4.399	3.296	2.623	1.288
416	108.3	2766	3854	218.6	139.8	231.9	285.6	217.6	195.4	169.3	213.4	202.9	199.7	170.7	194.5	181.4	179	164.5	154.4	147.1	124	116.9	100.3	102.8	88.25	93.48	84.84	81.59	78.45	66.9	64.85	71.32	186.8	234.7	81.04	34.1	29.94	25.39	21.82	15.3	16.39	130	3621	7724	1066	6.937	2.867	2.057	1.586
418	179.3	1567	5161	452.1	205.4	245.9	235.7	194	140.3	214.1	178.9	171	201	187.1	172.5	191.5	169.7	161.8	154	139.9	124.2	112	107.1	98.39	93.12	89.85	89.18	83.5	78.61	73.52	65.92	63.52	131.2	271.7	128	37.34	33.21	29.27	21.24	15.57	14.9	33.62	1225	7615	3351	57	4.425	2.701	1.94
420	215.1	894.2	5048	980.4	194.4	246.2	203.9	213.6	184.5	183.1	193.5	209.6	199.4	180.1	168.2	161.5	158.6	164.4	150	133.1	136.3	109.5	108.2	101.3	86.9	90.87	92.67	73.05	75.15	74.35	68.71	68.59	94.92	257	166.5	55.9	35.29	26.78	23.53	15.83	15.28	14.69	287	4966	6420	505.1	5.483	3.248	2.286
422	225.1	396.2	4981	1822	113	191.6	225.1	227.5	213.6	163	181.8	194.2	174.5	182.4	153.6	175.7	175.7	144.1	140.7	117.6	113.7	106.7	108.3	95.25	88.32	85.23	93.86	75.32	73.29	78.87	71.31	72.34	79.18	201	214.8	75.63	36.72	26.66	21.57	18.78	14.64	14.28	54.16	2110	7904	2060	15.18	3.498	1.601
424	345.2	106.8	4413	3252	223	178.7	194.7	204.4	187.5	194.7	215.8	154.5	185.5	206.8	178.4	178.7	158.9	144.3	148.6	125.3	110.2	102.4	103.6	96.18	87.09	90.45	91.62	77.59	74.43	71.99	69.77	70.25	72.97	144.8	243.9	108.4	39.16	27.15	23.3	17.52	16.16	10.7	17.84	586.2	6307	4972	181.6	4.596	2.351
426	150.8	108.3	3507	5105	265	197.7	190.2	188.4	201.4	223.6	198	166.3	173.7	177.1	163.6	173.6	159.2	145.5	127.3	115.2	102.9	92.67	91.39	92.87	82.54	88.91	82.4	79.26	77.8	73.63	68.72	72.2	73.1	103.8	241.8	146.2	46.92	28.9	22.8	18.72	16.21	10.11	11.84	114.8	3228	7577	1109	6.037	3.681
428	322	42.49	2281	6791	475	290	232.6	208.9	200.8	194.2	181	182.3	218	187.1	165.3	170.1	146.9	125.5	128.5	113	98.32	96.31	87.51	85.53	87.02	84.43	83.98	80.41	77.5	70.55	63.78	70.45	69.49	91.86	196.4	190.6	58.43	31.77	27	19.71	16.1	10.09	9.132	28.08	1092	7508	3429	47.88	2.302
430	215.7	37.09	1320	9025	1427	188.1	166.5	252.3	162.5	175.2	185.5	170.6	188.4	168.5	177.4	155.1	153.7	137.1	121.9	100.7	103.5	93.94	83.91	77.14	81.96	82.87	84.94	81.38	74.6	76.94	72.02	64.79	67.2	73.42	158	212.7	81.38	32.43	29.09	20.63	17.85	12.66	9.769	13.62	244.4	4851	6497	415	3.985
432	162.8	49.18	520	9874	3401	189	193.5	206.2	175.6	176	206.5	199.6	183.6	172.9	168.6	177.1	142.8	140.2	125.4	94.48	104.4	89.07	75.95	74.48	76.75	78.2	84.53	75.92	75.39	75.28	73.89	81.67	67.98	72.39	107.5	221.4	111.9	40.68	28.1	19.62	16.62	13.3	10.2	10.61	47.88	1998	7916	1821	13.14
434	216.4	73.93	205.1	9337	6761	115.6	236.6	176	169.6	181.4	203.8	194.3	185.8	178.9	156.8	156.2	145.6	136.8	108.6	98.19	96.72	84.31	76.33	79.78	77.29	76.13	80	80.38	75.47	72.44	70.87	74.41	75.21	74.2	86.22	181.7	157.3	48.58	25.48	21.55	16.31	12.14	9.869	8.662	17.54	553.3	6254	4391	156.6
436	135.9	54.82	73.04	7515	9999.9	324.6	176.2	153.8	237	225.6	230.1	189.3	184.6	158.9	185.5	148.8	135	132	113.9	94.9	88.39	73.47	83.68	70.56	77.64	72.76	83.85	76.1	81.82	80.31	69.44	77	80.03	77.2	81.44	146.3	186.8	63.56	30.26	23.7	19.38	12.14	10.76	9.746	9.843	106.4	3215	6822	945.6
438	145.9	6.589	67.1	5124	9999.9	929.6	147.2	188.7	155.2	162.8	183.8	181.5	179.9	171.4	172	158.6	133.6	123.7	102.6	90.3	85.31	77.27	61.25	70.27	72.78	70.4	83.17	77.73	74.81	76.47	74.1	85.82	78.6	72.69	80.39	104.5	189.6	100.8	30.41	22.71	17.16	13.53	13.09	9.276	9.784	24.79	1107	6771	2946
440	154.6	6.258	59.39	2711	9999.9	2639	204.9	191.4	194.7	163.2	176.4	187.7	184.2	174.9	170	180.8	135.3	122.4	104.1	84.42	84.3	74.79	68.95	68.88	72.39	63.03	65.86	71.29	78.59	74.91	78.84	80.77	77.42	75.84	74.05	90.54	170.5	122.3	39.25	27.51	18.54	15.37	12.04	10.64	9.222	10.28	253.7	4469	5587
442	160.9	75.82	76.38	1004	9999.9	6664	152.6	180.6	176.3	179.8	194.7	207	186	176.2	170.1	167.6	140.8	139.2	103.1	81.83	81.51	69.72	67.81	59.79	71.7	75.54	71.29	71.06	77.24	77.43	80.02	78.24	77.21	75.73	67.6	73.1	137	152.8	57.95	26.28	20.82	16.99	12.86	12.54	6.975	8.94	47.12	1868	6858
444	129.7	102.9	89.65	269.3	9999.9	9999.9	177.5	172.2	241.3	160.6	172.7	182.6	175.4	179.2	174.8	160.1	139.7	131.2	99.72	81.34	75.77	69.78	68.29	60.66	65.3	73.14	76.73	69.97	78.05	67.45	73.22	78.8	75.74	72.5	63.88	63.8	102.6	162.6	72.44	29.22	20.5	15.8	12.35	10.09	7.731	6.672	14.26	532.3	5493
446	199.7	86.89	87.91	144	9999.9	9999.9	380.3	180	170.2	158.5	176.6	182.2	179	194.6	171.5	150.4	159.1	120.1	95.66	82.36	65.75	68.24	66.46	64.12	62.57	65.02	73.53	74.91	71.73	74.87	75.57	77	74.7	73.15	70.38	66.91	74.17	156.5	99.47	32.74	21.97	13.44	11.64	8.918	7.503	7.107	8.512	99.86	2841
448	127.3	63.02	90.46	60.95	9138	9999.9	1331	141.1	168.2	185.6	185.8	190.3	185.4	179.9	157.2	166.2	145.7	118.8	91.65	91.56	69.41	67.82	60.83	56.45	62.3	64.41	68.84	71.12	68.58	74.51	71.6	72.55	73.84	71.95	70.07	64.94	67.94	130.3	121.9	41.09	19.28	13.36	11.86	9.648	8.671	8.064	6.971	22.43	964.8
450	186.4	13.53	61.59	83.95	4758	9999.9	4258	186.6	166.4	172.8	160.2	185.9	158.5	166.9	145.1	162	129.5	105.4	92.29	86.08	59.86	61.38	54.81	51.35	59.11	54.98	66.04	66.32	74.15	65.79	74.44	74.98	71.18	66.04	69.18	59.87	56.7	98.21	141.5	58.47	22.51	18.17	12.8	11.09	9.179	5.939	7.249	9.442	218.7
452	173.2	104.5	165.2	191.9	1841	9999.9	9649	193.1	153.6	171.3	171.5	190.9	176.4	169.5	152.2	152.6	115.1	110.8	87.2	75.44	56.71	55.47	52.69	55.52	60.33	49.49	60.91	64.5	63.99	70.9	71.39	74.81	69.76	74.29	70.39	59.88	49.09	73.35	136.1	76.68	25.24	14.36	11.4	8.936	8.168	6.517	6.993	6.634	40.71
454	287.8	86.8	166.1	89.12	533.9	9999.9	9999.9	212.8	187.4	157.3	172.8	164.7	178.8	180.4	146	150.1	129.2	117.5	95.74	71.81	64.97	59.81	61	52.61	48.84	57.28	57.62	65.05	58.13	66.47	66.44	77.31	67.45	71.98	67.04	63.52	53.14	58.55	119.1	93.01	32.31	19.15	13.55	9.613	8.907	7.9	6.35	5.464	12.52
456	184	75.73	91.69	99.12	215.9	9999.9	9999.9	387.2	155.6	170	169.7	169.4	159.3	172.6	141.6	146	108.9	118.1	83.77	61.25	52.81	53.58	48.45	54.57	49.03	53.32	52.52	57.6	61.77	63.8	67.49	70.4	71.32	69.14	63.19	60.6	57.07	51.85	96.92	116	45.94	17.7	13.26	11.45	10.26	6.941	4.525	4.881	7.472
458	115.4	89.81	58.1	203.5	167	9999.9	9999.9	1552	172.6	149.1	164.7	162.5	158.3	155	143.8	145.9	127.2	106	83.62	68.64	63.11	53.61	54.12	47.4	52.19	59.44	56	53.01	57.92	60.43	62.07	75.37	72.79	68.85	62.2	53.3	52.78	43.05	71.13	114.9	61.16	19.62	15.51	9.85	9.28	7.152	5.488	3.992	6.146
460	180.5	167.3	98.23	140.9	186.5	6628	9999.9	4572	156.4	155.8	144.9	147.5	161.2	146.4	145.3	152.5	131.5	104.6	77.97	64.25	49.17	47.11	51.6	47.72	44.3	50.17	49.18	56.78	54.08	61.2	62.1	70.86	65.19	63.76	66.65	61.36	57.43	40.32	47.25	104.2	76.01	25.25	14.63	10.52	9.505	8.366	6.647	5.08	5.817
462	160.9	84.91	46.46	112.5	143.6	2497	9999.9	9999.9	170	157.2	157.6	179.3	161.9	136.5	150.3	132.4	122	93.03	77.02	60.07	51.77	50.01	43.25	42.99	46.77	44.15	55.12	48.13	51.55	59.51	66.31	65.36	62.8	67.82	65.22	46.54	46.28	42.56	41.24	88.92	93.31	30.87	15.03	11.27	9.175	7.848	5.957	4.334	5.865
464	89.41	61.91	158.1	177.3	295	778.1	9999.9	9999.9	203	146.4	151.5	156.3	155.8	156.9	141.7	148.4	117.5	88.11	69.97	60.74	48.91	45.5	44.08	48.22	43.23	43.63	56.66	52.14	53.54	55.15	62.69	62.28	65.8	66.03	58.32	49.14	48.34	36.3	31.13	63.79	96.74	41.65	15.37	11.93	9.175	6.437	6.292	4.528	4.259
466	136.8	82.02	106.1	138.9	172.4	331.6	9999.9	9999.9	366.1	147.9	128.4	141.9	144.6	148.1	145	132.4	110.1	95.41	72.01	53.1	45.01	42	41.73	48.77	39.92	44.64	47.56	47.03	50.08	47.79	55.77	57.44	55.04	59.19	53.17	51.9	46.56	42.23	38.67	44.52	91.8	59.1	21.58	11.35	11.4	6.786	5.662	4.078	3.701
468	194.6	82.92	147.8	195.6	130.6	191.5	9999.9	9999.9	1581	165.4	159.9	160.4	158.7	143	131	127.7	112.4	75.87	70.77	44.69	42.05	41.96	38.88	38.89	42.39	42.76	43.11	46.81	44.69	49.38	47.68	56.55	57.21	54.66	57.28	48.21	45.66	39.68	32.29	37.49	76.02	70.06	24.55	12.06	9.636	5.771	7.996	4.628	3.801
470	191.8	139.3	97.65	182.9	241.4	228.2	6732	9999.9	5093	129.9	159.9	128.7	160.4	149.2	110.3	126.4	104.7	87.27	66.02	52.05	43.18	39.11	37.74	42.38	39.02	44.27	44.15	47.96	48.56	49.43	43.54	52.86	47.77	55.06	59.55	50.25	38.4	40.97	33.13	30.27	59.35	78.7	30.05	13.13	8.804	7.378	6.485	4.044	3.99
472	210.3	151.2	59.19	186.3	245.6	146.3	2701	9999.9	9999.9	134.4	147.5	173.4	164.7	136.3	125.4	119.1	97.49	83.14	63.54	49.9	42.5	42.49	38.85	32.65	35.93	42.19	46.17	39.9	52.13	50	48.42	53.49	49.15	57.58	51.09	49.12	41.2	38.64	30.52	28.62	41.99	78.11	45.38	18.04	9.662	7.072	5.962	5.361	3.182
474	140.7	62.51	85.47	124.2	250.1	146.9	762.3	9999.9	9999.9	181	121.8	150.5	176.1	115.1	128.9	116.7	95.05	80.94	62.37	47.2	41.77	35.8	31.48	31.73	33.78	35.38	40.52	39.78	46.25	44.6	50.86	52.72	53.45	55.35	50.07	50.6	38.2	35.64	29.42	24.34	26.76	72.93	54.25	18.19	11.57	6.061	6.022	5.184	3.917
476	85.29	66.93	88.73	165.4	316.8	166.4	269.6	9999.9	9999.9	391.5	127.2	136.3	121.4	110.1	112.5	106.3	98.8	81.4	67.81	42.46	38.26	40.01	33.15	30.06	32.49	36.47	35.62	37.09	41.64	41.89	47.49	51.03	54.7	49.99	43.95	47.06	39.73	34.59	29.25	25.1	25.34	58.35	68.2	25.95	9.317	6.55	6.59	4.031	4.519
478	180	56.87	151.3	92.44	284.9	157.1	131.6	9999.9	9999.9	1276	129.3	113.9	125.1	106.4	123.3	111.7	86.74	76.36	65.22	35.62	37.96	34.69	31.62	28.48	31.49	31.46	34.3	40.28	41.71	45.1	46.57	47.78	40.27	48.3	45.56	48.49	38.7	32.04	25.26	25.43	23.67	36.3	71.21	33.19	9.734	6.859	4.949	4.829	4.27
480	125.3	143.9	118.9	149.1	273.4	283.4	99.66	6670	9999.9	4793	153.4	126	128.4	111.5	122.2	103.4	85.58	75.51	53.2	38.39	36.51	29.9	32.5	30.79	37.14	32.84	34.31	38.33	42.6	42.11	41.8	41.41	44.39	46.89	41.71	41.65	37.85	32.87	27.69	25.79	21.48	28.08	64.33	42.2	13.46	6.334	4.881	4.24	4.926
482	173.7	113.1	91.99	133.3	246.4	290.6	93.56	2472	9999.9	9999.9	134.1	114.5	120.3	131	109.5	93.32	87.54	74.04	55.67	36.52	39.04	30.56	31.11	32	32.03	31.97	32.05	34.53	36.96	38.96	40.31	41.78	44.92	48.82	44.45	38.19	33.01	35.74	30.28	24.6	18.46	20.58	52.87	54.47	18.55	6.274	4.384	3.761	2.774
484	169.1	78.38	54.97	143.8	125.9	313.3	137	685.6	9999.9	9999.9	157.4	122.9	133.5	110.4	101.4	95.88	93.11	74.09	46.57	39.21	33.61	35.52	27.16	26.16	29.12	28.26	31.11	35.15	36.54	35.14	40.08	36.06	44.34	41	40.21	37.9	30.51	29.98	26.8	22.71	19.52	18.54	37.3	59.59	22.87	8.732	5.047	4.438	3.019
486	115.5	49.68	72.55	113	209.1	406	155.4	215.4	9999.9	9999.9	356.2	112.4	116.5	103.5	100.2	95.17	95.7	65.13	46.64	39.84	36.23	29	26.6	25.6	27.02	25.3	28.68	30.23	33.36	33.22	37.93	43.34	43.7	38.1	40.09	35.3	33.29	29.81	23.92	22.32	17.05	16.89	30.5	54.09	29.42	9.66	6.53	4.615	3.981
488	96.37	48.9	33.54	93.4	126.3	396.9	133.6	123.8	9999.9	9999.9	1450	101.5	88.37	114.3	104.1	93.31	85.58	62.13	52.73	35.64	34.03	29.21	23.55	22.69	26.05	28.81	27.89	29.74	30.72	29.73	34.15	40.92	40.38	36.57	38.78	33.68	32.17	26.74	25.54	21.89	17.76	14.86	19.64	48.73	44.75	12.5	5.821	4.033	5.109
490	173.9	37.54	52.84	136	137.1	385	200.3	136.5	5807	9999.9	4239	117	118	112.8	92.57	77.99	80.02	63.11	48.32	42	27.13	31.39	26.8	24.3	22.61	24.14	29.63	28.59	30.17	29.23	33.75	36.47	38.11	36.31	34.73	36.46	32.91	26.37	24.93	20.82	18.57	15.93	17.56	37.07	49.51	19.27	5.224	5.012	4.737
492	109.3	207.8	42.08	91.36	56.46	230.7	212.5	135.9	2227	9999.9	9571	128.7	100.2	96.07	97.45	86.97	69.03	55.07	40.17	32.68	25.95	27.29	23.06	23.02	23.49	24.07	29.29	26.2	26.86	33.16	34.01	34.34	33.83	31.94	35.32	35.64	33.61	26.81	24.12	20.54	20.09	17.94	12.4	24.62	50.05	23.6	8.03	4.068	3.864
494	121	95.25	97.66	69.06	107	279.4	308.6	124.4	655	9999.9	9999.9	155.1	110.7	93.36	89.16	89.72	68.99	53.17	40.21	36.1	24.94	22.15	18.49	24.91	20.6	24.99	25.76	24.39	30.18	26.61	25.62	28.54	35.08	31.87	36.22	31.5	31.25	26.41	22.55	20.35	17.49	14.68	13.3	17.96	42.51	30.43	10.5	4.539	4.803
496	149.5	120.6	39.97	38.99	112.3	220.6	345.4	104.2	207.7	9999.9	9999.9	269.6	107.8	82.6	95.28	70.77	69.02	56.31	42.2	29.5	15.65	23.68	19.97	20.32	21.34	20.87	26.16	24.68	25.45	23.97	30.08	30.21	34.98	31.5	31.86	31.67	29.67	28.65	19.61	19.99	16.76	15.1	12.44	14.38	34.05	39.55	14.47	4.2	3.541
498	144.1	98.67	26.34	43.06	57.21	163.3	355.7	89.8	99.83	9999.9	9999.9	1133	91.62	74.63	89.08	78.79	69	55.06	40	28.75	22.92	20.75	17.42	21.2	19.33	18.81	21.62	21.05	22.5	26.31	25.12	29.11	30.66	30.74	30.76	28.91	26.85	24.04	19.78	18.69	15.96	13.65	11.76	11.98	25.89	43.35	23.31	5.628	4.186
500	90.92	40.22	92.89	83.31	82.25	142.8	374.2	152.6	103.9	5255	9999.9	3471	89.53	88.1	81.53	74.29	58.24	49.42	46.22	32.98	23.95	22.54	20.32	20.67	20.12	18.77	22.34	23.6	23.72	25.84	26.71	27.35	29.74	27.71	30.01	26.63	26.71	22.43	18.78	18.08	16.27	13.88	12.38	11.95	15.64	40.23	24.93	7.794	4.009
502	43.35	45.24	30.95	52.47	77.36	124.9	290.4	200	82.98	2063	9999.9	7694	95.5	79.28	75.26	72.06	63.73	56.63	40.32	31.22	26.57	17.04	19.61	16.91	22.05	16.91	18.82	22.49	20.48	23.5	27.62	26.14	28.57	26.49	26.35	25.22	23.99	22.73	18.52	17.53	17.89	12.92	10.82	12.1	13.85	32.52	30.8	11.24	3.2
504	148.3	47.5	100.4	60.27	68.97	87.18	310.1	215.6	102.8	574.3	9999.9	9999.9	116.7	91.11	83.75	71.17	53.78	50.53	33.09	24.05	20.59	21.93	17.84	14.95	23.7	21	20.66	17.8	22.05	22.82	23.12	24.85	26.21	27.52	24.74	25	20.69	22.05	16.81	18.38	14.9	11.7	10.35	10.01	10.4	23.85	36.27	13.59	5.304
506	92.83	40.96	109.8	113.3	80.11	98.52	279.5	288.4	91.21	187.7	9999.9	9999.9	247.1	80.46	75.12	73.06	56.96	41.03	34.71	27.24	23.96	17.5	18.77	17.52	15.94	19.82	18.73	18.5	20.62	23.36	22.74	23.1	20.95	24.64	26.21	25.83	20.88	20.91	18.28	18.09	15.53	10.49	9.81	9.242	9.113	16.38	29.56	18.04	5.606
508	105.8	92.17	36.26	27.04	76.92	66.84	210.1	374.5	100.1	106	8758	9999.9	928.3	82.16	77.44	77.82	58.5	42.75	34.16	19.33	20.57	14.52	16.55	15.44	16.9	15.28	17.2	18.3	19.85	22.04	22.07	21.83	22.63	22.72	24.22	24.45	19.82	18.49	17.47	16.21	12.31	11.18	9.285	9.258	8.969	11.94	28.3	26.82	7.972
510	56.92	113	21.52	17.37	40.72	40.89	145.1	323.6	90.88	106.1	4453	9999.9	2764	75.44	67.28	66.76	55.89	42.23	34.86	21.94	20.18	17.86	16.45	14.8	16.08	16.06	14.83	16.81	20.02	19.64	19.96	22.02	19.53	19.8	22.98	21.11	17.87	18.41	16.59	15.63	13.09	9.743	10.78	8.729	7.871	10.13	23.92	29.15	10.26
512	49.81	25.61	45.06	98.77	87.07	94.1	83.28	367.3	119.2	72.59	1669	9999.9	6183	86.05	74.2	59.78	59.08	39.19	31.46	22.63	17.58	18.41	13.55	14.08	16.86	12.82	15.68	16.25	18.19	17.26	18.48	19.91	20.55	22.04	22.08	20.53	18.5	16.08	15.83	12.58	13.38	9.793	7.832	9.404	7.445	8.379	17.92	28.85	17.3
514	190.7	96.84	19.2	98.55	130	36.6	96.64	327.1	172.3	85.21	457.5	9999.9	9999.9	114.9	77.22	66.05	52.95	39.85	29.33	23.4	19.84	17.73	12.51	10.42	11.78	11.41	14.45	14.85	16.76	19.91	16.27	20.98	20.64	20.39	19.84	18.69	15.71	14.85	14.73	11.9	13.51	10.77	8.031	8.118	7.437	5.881	12.37	26.4	17.66
516	100.3	92.42	115.6	51.8	67.67	41.12	65.64	304.6	211.5	83.8	166.4	9999.9	9999.9	188.3	77.49	57.8	45	40.33	32.32	21.72	17.13	16.06	15.24	10.72	11.28	14.62	16.28	14.09	17.41	17.82	18.73	15.93	17.37	21.02	17.76	17.18	15.26	15.71	14.5	12.16	10.46	10.86	9.822	9.047	6.828	5.856	7.314	22.9	26.58
518	71.39	61.54	52.5	56.54	31.76	46.7	50.81	219.3	257.8	66.1	84.49	7675	9999.9	650.7	59.76	47.4	53.21	35.55	23.69	16.72	16.55	15.31	14.46	8.508	12.97	15.61	14.27	15.47	15.5	16.81	15.75	16.56	17.25	19.89	20.62	15.96	16.47	15.75	12.64	11.25	9.864	9.973	9.43	7.572	6.039	5.148	6.624	17.34	26.96
520	92.86	49.58	9.722	61.76	49.84	49.7	53.82	199	359.4	71.24	74.99	3846	9999.9	2155	69.87	53.97	50.46	32.24	29.17	28.01	13.61	13.61	12.75	9.595	12.06	11.9	13.56	13.61	17.04	16.26	17.2	18.02	16.01	17.57	17.14	16.33	14.75	13.56	12.29	11.76	9.012	8.953	8.123	6.326	7.104	4.68	5.931	13.67	26.2
522	72.99	192.2	89.3	85.88	74.38	29.72	38.75	154.2	315.1	92.27	96.75	1437	9999.9	5038	58.19	60	40.58	31.87	22.77	21.23	13.99	16.02	10.86	11.39	11.91	11.95	12.92	14.25	12.66	16.77	17.8	16.74	18.43	17.24	14.38	17.97	15.61	13.01	11.85	10.97	8.845	8.462	9.207	7.714	6.48	4.372	5.265	8.228	21.13
524	61.53	40.88	31.92	81.41	83.28	72.08	45.87	88.54	331.1	131.5	77.35	424.2	9999.9	8909	76.2	55.84	48.62	29.81	27.84	17.29	12.89	13.46	10.14	9.792	10.55	12.1	11.75	11.37	12.38	15.06	16.72	16.04	17.48	15.63	13.94	13.12	13.21	11.87	9.758	10.9	9.953	8.995	7.593	5.92	6.681	4.945	4.351	5.973	18.81
526	71.43	110.4	47.3	60.47	72.62	68.1	53.18	69.46	317.9	169.9	72.93	160.8	9999.9	9999.9	148.4	60.67	36.29	25.68	15.94	14.54	13.3	13.4	11.28	11	8.952	12.76	11.32	10.63	11.32	11.99	12.65	15.35	15.25	13.6	14.56	15.05	13.09	11.3	9.428	9.235	8.317	8.467	7.504	6.482	4.873	4.102	5.439	4.464	12.49
528	163.9	76.2	50.04	35.08	30.17	64.15	48.04	37.94	315.8	240.1	71.12	97.16	6552	9999.9	559.6	59.61	40.54	31.25	21.56	17.44	9.017	7.971	11.68	8.304	8.967	9.486	9.503	10.15	12.17	11.76	13.19	12.68	12.62	13.28	13.29	13.55	12.1	10.18	9.955	8.672	8.294	7.756	6.312	6.089	4.352	4.07	4.703	3.733	8.669
530	107.6	107.1	25.8	48.56	50.54	65.16	46.15	37.42	246.5	292.9	83.17	72.96	3297	9999.9	1591	52.75	39.78	36.9	22.82	14.83	7.658	11	12.22	11.24	9.404	9.834	8.235	11.42	11.19	12.95	14.41	11.83	12.2	14.87	13.31	11.15	11.33	10.49	11.63	7.53	8.403	6.739	6.629	5.47	5.355	3.863	2.99	2.915	5.803
532	33.9	23.22	33.05	29.2	34.31	28.32	68.61	51.81	197.1	278.9	68.07	61.23	1271	9999.9	3810	50.08	33.93	29.3	21.81	18.41	11.07	9.666	9.887	11.15	12.35	9.549	10.73	12.93	10.51	8.978	10.5	11.88	13.99	11.65	11.49	12.07	11.37	9.784	8.683	7.699	8.823	7.158	4.944	4.649	5.453	4.239	3.669	3.815	4.274
534	46.12	78.71	28.7	57.52	49	82.8	46.31	41.88	140.5	313	83.94	87.62	401.6	9999.9	6723	61.71	40.54	28.9	21.01	12.23	12.68	9.462	8.33	9.605	10.86	8.807	9.552	12.49	9.538	9.929	11.2	9.939	11.59	12.96	8.526	10.32	10.63	8.431	6.114	6.359	6.594	6.134	4.737	4.986	4.451	2.928	3.507	3.67	2.355
536	83.83	23.49	84.92	67.27	38.83	47.45	39.34	39.59	91.09	341.9	96.66	82.38	137.8	8595	9999.9	139.2	43.41	29.42	20.88	16.71	10.26	12.13	7.414	8.198	8.542	8.905	8.641	7.094	8.918	12.4	11.1	8.602	10.64	11.27	11.38	9.008	9.35	9.401	8.967	7.298	8.001	4.847	5.333	6.4	4.42	3.245	3.132	3.875	3.147
538	54.08	46.18	64.83	64.45	49.9	52.63	39.3	24.76	64.64	301	134.4	65.1	74.64	5305	9999.9	421	42.88	24.1	22.96	12.73	11.96	10.51	10.45	8.961	8.047	8.132	8.728	8.625	7.629	9.922	11.11	10.19	11.8	10.98	10.35	10.6	9.574	8.311	6.945	7.402	6.108	5.663	5.914	4.572	4.414	4.123	2.829	4.094	3.212
540	9.337	20.75	50.1	92.78	51.83	34.05	30.06	30.79	37.73	276.4	180.2	56.78	52.05	2656	9999.9	1249	43.16	25.32	21.32	13.8	10.39	10.37	8.8	8.719	9.165	6.966	8.167	10.01	5.866	7.482	9.893	8.497	9.917	10.03	10.41	9.752	7.926	6.95	6.607	7.482	5.234	5.735	5.259	4.516	2.971	3.939	3.012	2.626	3.914
542	67.59	31.25	64.63	109.2	54.75	65.79	27.27	33.46	54.96	232.1	250.9	52.44	54.74	1014	9999.9	2818	38.78	26.86	15.93	14.33	8.46	6.975	6.46	9.98	6.571	10.13	6.555	6.925	6.887	8.367	6.982	8.442	8.713	8.246	9.287	8.048	7.762	9.045	6.227	6.59	6.462	5.347	4.729	3.998	3.81	3.958	3.006	3.295	3.697
544	134.4	46.2	21.25	76.06	42.41	42.38	35.3	37.56	40.4	173.8	283.1	46.92	63.3	308.6	9999.9	4881	44.26	27.59	19.09	11.38	10.13	7.865	7.719	6.082	8.631	7.323	6.609	7.466	6.686	6.005	10.07	8.685	7.485	8.024	10.07	7.74	8.121	8.003	6.486	5.406	4.596	5.65	3.695	4.306	3.06	3.454	3.157	2.614	2.771
546	77.1	9.319	58.06	68.8	41.28	72.54	17.93	22.19	28.1	124.9	316.2	68.69	57.71	116.8	7185	7341	102.3	21.8	14.36	9.758	10.44	8.926	7.183	8.667	6.893	7.186	7.431	6.162	7.177	6.22	7.395	8.757	8.699	8.619	9.282	8.083	7.916	5.705	5.502	5.839	5.511	4.509	3.369	3.314	3.573	3.077	2.925	2.155	2.305
548	89.03	55.52	51.59	80.39	72.14	86.9	25.18	24.79	30.56	64.27	333.5	98.65	59.95	70.47	4455	9169	353.6	25.06	16.04	12.16	12.47	7.311	6.746	8.889	9.063	6.126	6.04	7.649	6.054	6.027	8.136	8.732	8.154	8.444	8.568	6.475	7.239	5.587	6.281	5.218	4.387	3.438	4.349	2.943	4.414	3.413	3.072	2.228	2.769
550	43.24	22.46	20.9	90.21	85.24	59.57	54.53	25.78	46.13	45.83	311.2	123.3	56.3	59.93	2210	9815	888.3	23.72	16.54	11.77	8.823	9.526	9.141	7.391	7.58	4.126	4.998	5.401	7.212	5.78	6.337	8.161	8.538	8.609	7.451	6.907	7.222	6.696	6.27	2.8	4.738	4.345	3.558	3.941	3.551	2.791	2.41	2.509	2.479
552	38.69	36.14	44.6	72.88	41.1	53.77	37.84	35.55	29.4	42.73	252.2	181.7	52.07	66.45	855.5	9336	2062	23.83	16.3	12.33	12.98	7.313	6.899	7.206	5.288	6.257	6.629	8.932	5.984	4.882	5.323	6.988	7.705	7.516	6.114	6.033	5.814	6.132	5.496	4.87	4.576	3.964	2.961	3.388	2.37	2.82	2.108	2.036	3.138
554	48.98	36.73	41.56	62.32	25.97	33.84	28.03	41.66	28.93	34.28	228.3	231.7	50.96	57.47	282.5	7525	3479	23.08	18.38	9.905	7.562	11.98	6.218	7.465	4.107	6.281	6.757	6.476	5.709	5.473	6.697	6.126	7.598	5.976	6.717	6.984	5.907	5.871	4.114	3.899	3.805	3.834	2.923	3.365	2.81	2.51	2.629	1.823	1.512
556	27.23	95.43	48.97	54.21	55.6	45.5	66.98	19.46	34.04	28.99	150.6	262.2	53.78	46.22	117.4	5267	5153	77.67	16.17	10.42	11.56	7.444	5.464	7.664	5.612	5.413	4.846	6.535	5.672	6.091	7.566	5.444	7.145	6.361	6.117	5.667	5.163	5.858	3.699	3.675	3.254	3.32	3.251	2.665	1.997	1.914	2.667	2.468	1.966
558	60.35	21.56	35.9	27.98	45.53	51.59	38.59	28.47	26.81	25.96	107	294.7	78.89	60.37	74.31	3285	6375	242.1	18.15	10.98	8.965	7.075	5.01	5.566	4.808	3.678	5.972	4.671	4.738	6.091	5.274	6.394	5.143	7.187	4.459	5.861	5.346	5.477	4.063	4.229	3.591	2.574	3.141	4.335	3.571	1.939	1.921	2.243	1.914
560	21.88	66.94	54.15	83.63	66.11	37.53	35.56	23.8	21.58	22.9	67.64	322.8	97.84	54.21	70.27	1693	7047	620	20.3	11.33	7.309	7.849	6.423	6.845	6.271	4.289	6.776	4.501	4.818	6.395	4.952	4.585	4.282	5.514	6.41	6.172	4.474	4.919	3.257	3.212	3.945	2.63	2.526	3.598	2.775	2.185	2.46	1.525	1.271
562	69.89	27.98	67.65	45.37	104.6	49.52	32.34	28.28	37.22	18.94	59.54	300.4	132.5	51.26	57.02	716.5	6651	1364	17.49	9.53	7.775	7.903	6.724	5.109	5.281	5.566	4.888	3.932	4.181	4.562	4.627	5.842	4.882	4.105	4.257	5.288	4.588	3.985	4.235	3.496	2.807	2.347	2.928	2.275	2.308	2.082	1.61	1.404	1.716
564	209.8	27.54	44.86	39.59	69.05	28.93	37.12	27.8	40.27	27.26	31.05	255.4	203.5	61.55	70.82	278	5520	2299	19.96	11.95	8.94	5.998	9.026	5.793	4.894	3.844	5.272	4.726	4.169	4.217	4.26	4.369	5.569	4.359	5.23	4.913	4.678	4.188	3.6	2.584	3.313	2.678	1.796	2.36	2.318	1.794	1.547	2.06	1.208
566	149.7	92.82	60.95	54.75	31.1	40.36	52.33	38.93	41.36	30.9	28.85	222.2	242.5	67.14	73.99	111.4	3985	3533	43.49	10.9	7.608	5.796	6.583	7.351	3.48	5.491	4.705	5.599	5.514	3.088	3.872	4.092	7.141	4.666	4.837	4.986	4.859	4.184	2.686	2.809	2.542	2.367	2.407	2.08	1.433	1.345	1.113	1.394	1.614
568	32.71	28.51	35.1	63.55	35.09	79.17	53.87	24.62	42.22	21.71	31.5	151.1	284.2	69.61	65.67	68.81	2363	4426	150.6	12.54	7.963	8.356	5.771	5.429	4.847	6.993	3.608	4.085	4.13	4.872	4.153	4.03	6.023	6.474	5.18	4.036	4.003	4.202	2.722	2.596	2.588	2.632	2.015	2.019	2.498	1.718	1.925	1.738	1.945
570	77.64	112	44.75	48.16	129.6	120.5	62.18	29.01	43.27	29.63	43.95	133.6	318.1	84.93	67.05	73.22	1197	4899	448.9	11.33	8.749	6.652	5.323	6.706	5.057	4.368	3.365	4.352	4.392	4.909	4.202	4.176	3.615	5.49	6.01	3.364	3.388	3.143	3.362	3.201	1.899	2.346	2.322	1.725	1.842	2.117	1.724	2.25	1.383
572	68.51	61.72	46.6	54.62	124.9	77.79	44.7	46.87	24.3	33.31	31.42	69.82	347.6	136	74.49	60.89	502.2	4829	979.1	14.45	9.196	6.719	6.496	4.383	3.544	3.321	4.884	3.043	4.889	4.289	3.288	4.671	4.522	3.964	5.584	5.021	3.018	3.184	3.754	2.78	2.438	3.147	1.748	1.274	1.156	1.12	1.347	1.728	1.337
574	45.28	39.46	42.99	93.92	77.09	61.98	56.2	33.96	43.7	16.68	32.04	57.34	293.4	137.2	65.11	79.13	199.7	4092	1681	16.83	7.168	6.978	6.228	4.951	3.752	4.249	4.663	3.779	4.056	4.062	4.372	3.488	4.597	2.705	2.301	3.277	2.931	2.177	2.65	3.129	3.075	2.228	1.491	1.918	0.933	1.222	1.651	0.843	1.423
576	84.38	46.36	21.42	100.2	87.12	81.69	72.57	25.82	29.71	24.22	30.14	49.54	261.7	192.7	72.61	76.27	87.11	3010	2518	49.75	9.697	10.38	7.655	4.793	5.637	4.117	4.093	3.013	3.009	3.881	3.25	4.152	4.088	3.382	3.759	4.11	2.775	3.003	2.338	2.38	1.914	2.208	1.464	1.732	1.294	1.546	1.496	1.271	1.104
578	50.63	37.57	23.94	19.99	89.91	151.6	60.98	41.08	30.35	34.98	44.75	46.9	215.7	215.2	71.5	78.69	61.39	1843	3351	131	9.812	9.173	6.317	4.938	3.79	5.34	3.78	4.248	3.81	4.148	3.922	3.112	3.513	2.323	4.347	3.288	4.4	2.694	2.485	2.543	1.834	2.228	2.382	1.288	1.538	1.271	1.169	1.254	1.099
580	80.6	33.94	11.76	73.67	96.76	109.3	86.61	53.4	15.07	19.57	31.31	30.41	160.3	303.7	88.05	92.08	52.64	927.6	3728	349.1	10.03	7.845	4.615	5.279	4.132	4.125	3.902	3.996	3.886	3.614	2.409	4.652	3.424	3.681	3.39	2.74	3.085	2.67	2.397	1.845	2.438	2.122	2.864	1.357	1.321	1.763	0.942	1.232	1.59
582	24.07	17.21	1.676	86.4	56.7	60.54	70.64	40.98	17.06	18.79	29.21	29.8	129.3	286.8	93.86	78.43	62.17	405.4	3596	727.8	9.384	9.206	5.048	3.762	4.514	4.111	3.052	2.933	1.969	2.842	2.561	2.823	2.889	3.099	3.294	2.622	2.06	2.84	2.632	1.484	2.292	2.2	1.217	1.84	1.134	2.074	0.953	0.906	1.403
584	91.89	52.66	24.12	71.4	60.26	92.39	67.61	49.52	18.51	25.79	36.75	39.79	87.72	301.7	125	86.3	54.38	143	3130	1300	16.88	6.245	8.235	4.891	3.982	5.912	4.933	3.145	2.847	3.158	2.914	2.611	3.036	2.616	2.231	3.433	2.737	2.042	2.612	2.21	1.579	1.46	1.74	1.332	0.959	1.538	1.173	2.42	1.052
586	65.01	36.39	31.47	46.91	114.8	101.1	91.17	37.76	17.05	31.42	21.72	32.32	60.6	320.8	159.3	85.18	53.22	66.44	2278	1980	29.89	10.11	7.076	4.883	3.723	3.614	2.48	2.951	3.548	2.422	3.221	3.072	2.656	3.136	3.589	4.017	2.283	2.699	2.295	1.379	2.509	1.342	1.506	1.931	0.905	1.265	1.205	1.144	1.049
588	169.2	43.51	13.61	31.71	108.1	88.01	86.87	36.38	16.94	24.03	37.97	54.09	59.03	261.5	180.5	76.33	53.25	43.05	1435	2563	92.77	6.678	6.987	5.347	3.301	2.886	4.669	4.283	3.685	2.25	3.207	3.283	2.528	2.473	3.635	3.693	2.064	2.711	1.866	1.94	1.408	1.715	1.649	1.515	0.99	1.307	0.756	0.859	0.86
590	203.2	34.72	-0.071	58.79	71.93	119	74.21	39.36	22.57	24.43	28.42	36.31	66.91	197.7	221.9	84.59	71.69	32.66	749	2876	257.6	8.741	5.093	6.975	2.898	4.394	2.862	4.538	1.886	2.781	3.006	3.132	2.514	2.23	2.46	2.779	2.338	2.03	1.809	2.905	1.915	1.477	0.851	1.033	1.126	0.625	0.952	1.141	1.132
592	185.9	30.16	59.72	67.35	95.89	130	55.17	49.86	22.9	18.89	33.32	37.42	57.51	156.2	285.6	81.32	74.93	42.69	280.7	2839	551.1	9.219	4.987	5.593	2.997	4.189	3.73	4.789	3.877	2.771	3.721	1.52	1.968	2.687	2.293	3.116	2.243	2.029	1.879	3.059	1.649	1.486	1.305	1.178	0.86	0.5	1.27	1.155	1.326
594	214.3	70.83	4.974	146.8	107.1	139	99.77	44.37	32.38	32.85	30.85	39.53	44.4	114	285.7	104	65.61	36.33	96.06	2445	980.2	11.52	5.027	4.642	3.634	2.746	3.417	3.922	3.036	2.857	1.552	3.102	3	1.78	2.431	2.24	2.483	1.498	1.792	2.209	1.343	1.85	1.491	0.375	0.785	1.601	1.501	0.834	0.816
596	221.7	35.98	2.85	75.5	86.91	90.41	68.08	34.73	22.29	32.46	42.02	48.7	57.99	96.52	322.4	109.9	68.38	39.01	35.37	1718	1533	22.29	7.088	4.301	3.136	1.223	3.839	4.359	3.641	4.245	1.375	3.413	1.724	2.766	3.187	2.699	2.327	2.125	1.166	1.954	1.455	1.746	1.555	1.017	1.657	0.648	1.192	0.963	0.806
598	384.3	59.51	38.57	51.15	70.04	98.68	40.99	70.46	32.08	19.77	27.83	35.06	59.72	97.56	286.6	136	59.42	37.19	32.4	1073	2051	60.91	4.285	3.457	3.7	2.331	3.891	4.372	3.305	1.792	2.452	2.056	1.583	3.612	2.13	1.431	1.802	1.974	1.379	2.103	1.32	1.262	1.648	1.213	0.793	1.159	0.954	0.748	0.788
600	222.3	110.1	41.38	49.52	146.3	83.93	87.39	36.9	37.02	25.82	42.81	41.7	44.15	80.51	253.8	157.9	65.35	36.34	33.54	572.2	2287	182.3	5.352	4.084	4.385	3.23	3.538	2.802	1.724	2.552	2.029	1.365	2.062	3.153	2.081	1.526	2.01	1.781	1.39	1.423	2.943	1.524	1.338	1.065	0.756	0.862	1	1.148	0.894
[truncated: 2 more columns]
