# Supplementary material for: Utilization and transformation of Chrysotila dentata-derived dissolved organic matter by phycosphere bacteria Marinobacter hydrocarbonoclasticus and Bacillus firmus
Source: PeerJ. 2024 Jan 4;12:e16552. doi: 10.7717/peerj.16552 (PMC10771764; doi:10.7717/peerj.16552)
Supplement: Supplemental Information 14 [file peerj-12-16552-s014.xlsx]

## Sheet: Sheet1
45.29	73.09	140.1	53.66	883
-2.839	53.15	103.4	61.78	208.9
12.94	33.7	27.89	208.2	155.2
42.02	41.69	160.7	357.8	263.9
81.95	79.97	110.3	212.6	378.2	288.2
65.45	30.96	119.2	202.1	531.6	234.4
52.03	95.25	78.08	79.49	469.6	482.5
110	70.16	83.32	115.4	375.1	619.1
19.04	149.3	74.95	99.98	216.5	685.3	340.4
163	70.35	102.5	93.11	208	638.4	576.2
165.4	29.01	113.6	112.8	145.2	486.1	887.5	267.1
157.3	95.05	167.3	160.7	55.69	283.3	852.6	400
64.88	87.38	98.85	162.1	147	140.6	663.9	669.8	223.1
165.7	74.38	138.9	71.88	68.76	85.97	413.4	844.8	229
163.1	90.87	154	105.8	83.8	133.4	204.4	930.6	429.2	379.8
126.6	223.2	145.1	94.93	93.72	95.28	128.5	770.3	742.7	198.2
141.3	93.5	53.86	91.15	107.9	79.13	66.12	430.3	993	294.4	748.5
257	112.1	194.4	144.5	111.9	125.8	30.34	223.6	1046	467.3	184.9
120.2	158	71.87	125.3	99.1	130.9	66.32	140.2	818.6	984	178.5
131.7	77.69	138.8	140.5	143.4	99.38	67.06	82.32	497.5	1206	293.4	356.4
54.7	94.6	138.5	124.3	102.8	96.25	98	85.76	248.3	1159	546.2	148.5
77.12	93.53	200.1	124.8	169.4	103.7	107.9	46.62	122.6	840.7	906.6	156.4
79.29	96.51	132	147.8	195.1	140.7	108.2	48.83	54.11	531.9	1274	324	200.3
90.91	177.5	143.8	257.5	247	222.4	133	55.51	71.9	251.6	1405	587.9	159.8
125.3	229	184.5	247.8	275.9	180	116.5	76.99	52.01	118	1033	1062	215.3	415.9
183.9	173.2	107.6	209	294.4	248.5	140.1	86.01	58.63	80.49	520.2	1448	356.4	226.4
236	102.9	157	315.9	335.7	312	174.4	89.33	70.45	67.93	260.9	1447	755.3	195.4
108.3	171	140.2	392.1	489.4	488	205.4	78.28	76.67	83.73	150	1142	1252	243.4	307.7
123.1	164.1	306.3	340	573.6	526.8	249.2	114.6	76.57	87.41	108.9	667.9	1671	462.6	251.5
112.4	163.2	148.3	303.3	431.1	457.3	300.3	114.1	86.53	94.39	108	379.7	1658	847	340.3
216	137.6	184.7	335	543.7	594.5	339.1	153.7	81.1	84.57	130.9	245.9	1254	1435	384.3	374.1
212.7	151.5	267.7	284.3	662.9	707.5	403.8	192.7	132.8	97.75	133	200.1	816.7	1869	633.1	390.7
171.5	135.8	196.4	304.3	539	783.8	498.3	216.1	138.1	110.2	142.9	196.8	459.8	1958	1003	413.9	413.3
240.7	71.93	228.3	357.6	635.8	721.4	487	270.2	147.3	145.7	171.8	196	371.8	1539	1665	545.7	379.9	1399
56.85	150.3	111.5	346.9	722.5	883	492.9	335.9	138.6	150.9	175.6	215.3	327.1	1013	2126	751.5	418.8	447.8
82.67	134.5	117.4	305.4	780.6	818.6	649.6	314	150	154.1	187.2	264.9	290.3	690.6	2123	1106	436.6	319.2	2393
252.7	115.8	121.8	331.6	535.6	807.5	621.2	323.6	179.6	166.4	211.1	262.1	324	529.9	1695	1690	538.2	307.1	559.7
241.3	105.4	92.73	346.3	658.6	811	659.4	354.8	171.6	193.1	221.1	294.1	369.4	504	1236	2103	672.7	323.6	248.1
77.21	136.7	211.3	271.2	709.2	888.5	621.4	336.6	220.9	211.3	261.4	325.3	410.1	530.7	860.5	2195	1054	363.2	223.5	885.1
142.2	144.4	198.8	317.3	705.9	908.3	576	342.3	226.2	248.8	297	382.2	443.6	546	684.3	1809	1541	396.9	225.3	229.3
107.4	95.65	129.1	282.7	683.4	765.1	609.4	409.1	280.7	254.1	331.1	403	513.3	572.1	683	1351	2008	552.8	231.7	131	1594
50.11	116	210.3	289.2	778.6	838.9	747.7	399.6	249.7	273.8	344.6	444.1	533	612.1	686.6	982.1	2092	896.7	258.2	133.7	328
165.8	142.5	112.3	304.5	648.5	809.6	732.3	375.9	285.1	340.4	362.5	458.9	624.9	695.8	735.2	854.1	1848	1317	298.9	138.1	138.6	2896
185.6	103.6	188.1	404.5	879.8	928.4	665.6	431.7	326.2	314.9	405.9	484.5	682.8	734.1	824.5	847.4	1291	1736	421	142.7	103.3	638.9
97.48	137.9	144.5	523.7	991.3	941.1	677.2	411.3	365.3	340.2	484.5	545.9	741.5	790	883.1	886.9	996.4	1874	729.9	178.3	99.2	162.1
172.9	140.6	253.5	542.6	1124	1051	744.3	435.1	322.6	375.5	465.3	623.3	788.6	869.9	964.1	933.5	846.3	1638	1113	206.1	107.7	94.44	1300
79.72	151.5	131.8	531.9	1413	1119	838.1	454.6	373.3	381.3	475.4	690.5	835.8	942.2	1053	994	821.6	1152	1492	330.3	113.8	88.49	276.4
56.08	159	233.4	605.3	1445	1302	808.8	499.7	391.7	372.4	583.7	751.5	927.7	1003	1069	1034	796.6	874.7	1526	539.5	138.1	81.7	103.4
144.4	90.4	212.8	545.4	1339	1264	711	484.7	341	410.8	575	714.3	891.5	1028	1082	1050	858.6	739.6	1339	875.1	162.8	88.23	80.51	523.9
202.5	167.6	220.5	547.5	1279	1300	807.6	447	429.8	445.1	601.6	743.4	873.6	1044	1074	1083	866.6	691.9	997.8	1161	236.8	94.27	76.52	132
135.3	127	104.2	570.1	1188	1168	726.9	478	417.8	461.9	604.3	731.4	930	1062	1082	1046	884.3	670.4	698.8	1289	413.7	103.6	77.93	74.54	1058
117.8	56.51	78.43	547	1261	1289	817.4	503.4	408.1	491.5	557.6	750	902.8	1120	1099	1090	891.5	717.9	544.9	1084	700.4	114	79	63.58	220.2
105.9	145.6	168.4	691.8	1346	1134	805.1	529.6	409	415.9	558.2	819.4	918.3	1041	1147	1071	856.7	700	498.5	756.4	948.1	180	75.74	58.61	81.12	2014
54.26	71.18	135.2	531.5	1111	1187	743.5	462.3	400.5	499.3	561.2	744.6	959.5	1077	1086	1046	922.9	692.9	487.6	509.5	1044	332.3	83.57	67.6	65.25	435.6
108.1	52.39	245.9	633.7	1231	1062	661.3	444.6	407.8	460.2	541	737.3	914.5	1080	1127	1043	893.7	721	494.6	356.4	913.6	565.3	96.31	62.1	57.06	111.8	3471
88.09	239	143.2	470.6	1245	1176	691.8	452.9	404	507.9	579.8	735.7	876.8	985.4	1073	1061	858.4	676.2	481.5	309.8	654.6	802.3	138.9	60.36	53.26	54.18	898.1
55.21	98.21	131.7	382.6	1032	1156	683.3	511	380.1	444.2	500.8	724.4	889.4	946.7	1041	1010	864.8	632.7	472.4	285.8	403	876.7	267.8	70.48	58.4	44.86	180
86.66	82.86	141.3	319.2	939	1066	636.8	479.9	345.8	393.3	476.9	659.9	821.2	948.2	1041	944.4	818.2	682.9	474.4	275.4	254.7	791.1	443.8	71.51	61.03	52.36	65.74	1711
68.72	48.46	97.46	441.9	799.6	948	651.3	427.3	397.7	388.9	508	624.5	803.1	912.4	969.4	927.9	799.4	671.1	452.9	274.9	199.6	559.9	681.6	132.5	60.92	51.75	48.81	357.4
126.3	90.12	161.8	386.3	885.4	976.2	646.7	430.7	397.6	398.7	478.7	622.3	733.2	913	909.7	877.4	763.3	589.8	450.2	283.1	177.9	342.7	767.4	223.7	60.56	49.9	46.18	88.96
222.3	267	113.8	477.3	895.9	749.3	605.5	403.2	362.2	401.6	471.6	604.5	676.2	796.7	847.9	865.4	768.7	596.8	467.2	268.4	162.7	214.6	721.3	387.5	79.74	53.19	48.37	46.87	789.7
134.8	126.6	128.3	362.8	903	940.9	628.2	435.3	349.8	364.9	432.5	526.8	696.2	787.9	814	843.1	710.1	555.9	428.8	261.9	168.6	156.8	522.5	563.2	119.3	55.19	51.12	42.85	158
95.2	100.4	131.9	385.5	762.1	770.3	569.3	427	325.4	358.7	416.4	512.8	669.5	692.2	862.2	811	705.2	544.7	444.5	272.1	172.5	138.3	318.4	684.4	197.2	59.09	49.4	50.93	55.64
77.38	87.35	84.48	293.3	711.6	727	535.3	401.4	277.3	385.9	407.8	501.4	628.6	703.5	786	812.9	664.3	552.3	405.9	271.7	171.9	128.6	218	646.7	354	77.81	54.51	48.45	39.48	322.6
198.9	193.3	89.47	342.8	676.2	599.3	503.1	413.1	288.3	369	345	475.8	578.9	660.9	703.5	765.7	662.8	523.1	389.9	252.8	168.4	134.5	139.9	496	498.6	98.54	53.58	49.48	39.31	76
137	44.63	114.4	414.9	724.5	746.4	481.6	333	333.7	356.8	386.7	438.4	549.9	656.8	681.8	672	636.2	497.1	394.6	257.4	166.9	127.3	127.2	338.3	607.3	186.4	59.3	47.98	41.43	42.36	765.6
139.5	121.4	86.29	265.5	521.6	650.6	422	328.2	271.6	308.4	376.4	405.4	502.6	593.5	661.6	642.9	596.5	488	378.4	250.1	162.1	141.4	123.7	218.7	593.3	299.6	82.39	56.83	39.68	36.76	149.9
159.1	128.9	55.75	263.2	603.4	628.8	452.4	371.9	310.5	282.7	316	454.7	478.2	588.1	659.3	607.3	547.1	464	358.4	233.9	172	133.7	128.4	157	487.7	448.2	100.5	54.99	44.06	34.15	51.54
72.96	35.29	148.9	314.6	476.2	552	462.7	303.7	271.6	259.3	329.2	391.7	455.4	515.6	605.7	603.9	545.8	464.4	370.2	240.4	164.2	137.2	129.4	132.6	326.7	563.4	159.4	63.1	42.43	35.35	35.07	327.9
101.7	80.69	79.8	264.1	630.6	552.1	364.4	239.8	255.3	212.1	348.2	362.4	415.2	511.2	560	575.6	499.3	431.4	353.7	241.3	172.4	147.6	134.9	135.4	211.4	565.5	262.5	66.48	53.53	38.02	28.27	77.45
118.1	113.3	72.96	159.8	524.7	644.2	376.9	281.9	255.3	250.7	295.6	316.8	363.6	473.8	529.2	538	480.6	415.8	337.3	236	167.1	143.9	138.8	130.5	157.9	464.6	382.6	93.12	55.37	39.11	30.83	35.58	747.7
204.7	136.3	22.64	243.7	486.8	439.7	453.9	274.5	222.1	223.5	273.6	290	370.4	465	511.4	501.9	474.8	396	309.9	217.8	172.5	142.6	140.3	132	128.8	331.2	487.1	133.3	54.81	36.61	33.75	29.47	141
83.18	74.4	106	299.8	437.7	489	397.2	303.6	223.8	227.8	271.5	288.5	356.6	443.7	469.9	486.2	435.6	382.7	314.5	207.4	156.5	140.2	134.5	133.3	128.3	223.1	504.6	222.8	62.88	40.4	35.43	30.74	44.14
28.15	76.7	132.2	250.7	452.1	496.6	301.1	295.8	202	261.7	271.2	284.5	311.4	413.3	436	448.8	429.9	359.3	307.3	201.8	157.2	135.8	141.5	132.5	126.4	158	430.5	334.2	80.35	46.88	39.08	31.37	28.64	329.6
9.258	137.4	39.22	181.5	383.7	505.7	304.8	266.9	189.1	222.5	256.3	258.9	327.1	372.4	412.4	386.7	398.7	360.9	296.1	195.3	183.5	144	139.4	127.7	129.1	132.9	312.8	417.9	119.3	45.51	36.58	30.35	28	74.33
17.94	89.11	106.7	167.7	425.1	415.2	361.5	221.4	221.7	209.4	246.3	243.4	256.9	311.5	394.1	421.2	368.2	338.9	274.6	192.9	162.8	148.3	138.9	126.4	126.2	125.2	213.6	452.4	189.5	51.12	38.06	32.2	28.02	34.9	739.1
111.7	60.53	157	164.4	309.2	346.1	346.5	244.3	215.2	189.8	247.8	251.3	263.8	316.3	374.3	361.5	341.9	310.2	263	197.5	164.5	138.9	149.2	137.4	128.8	114.9	148.4	401.5	275.8	66.02	41.08	36.7	29.87	26.92	135.5
181.2	114	66.49	233.3	275.2	381.2	329.9	233.6	203.1	210.2	213.3	232.6	257.7	300.4	333.7	364.1	346.8	295.7	256.2	186.9	158.1	135.4	147.1	136.8	123.6	124	120	303.8	368.3	94.02	43.88	38.59	32.35	28.49	43.12
209.8	68.12	133.8	112	242	441.6	299.1	235.7	167.4	168.5	168.8	210.7	244.4	258.7	307.3	357.4	307	276.1	246.8	179.6	146.6	142.9	135.2	132.9	131.8	125	107.6	215.6	412.7	160.5	49.84	37.44	32.52	30.77	27.23	291.1
215.4	40.99	196.4	193.9	297.4	424.5	283.3	223.1	180.5	190.4	169.3	203.5	226.8	279.9	301.1	300.9	319.1	286.4	237.3	180.6	149.8	131.5	142.4	133	130	133	117.2	148.4	368.1	245	56.08	36.94	34.26	28.09	25.21	67.08
681.8	4.468	157.6	176.8	253.8	317.3	239.5	197.2	174.5	179	215.5	201.6	211.6	255.2	307	303.8	284.1	273.1	227.6	174.9	137.2	148.4	129.7	132.4	128.9	124	116.1	107.7	287	323.6	82.4	43.02	37.19	33.05	25.34	35.41
1656	49.27	132.7	180.8	333	310.4	221.3	159.5	190.1	171.3	188.6	197.2	211.1	229.3	305.9	289	268.1	259.1	215.8	152.6	151.8	136.3	137	132.8	130.9	115.9	114.5	105.2	202	354.4	138.3	46.26	36.92	36.35	27.86	26.23	120.8
3196	11.84	111.8	121.9	285.7	274	245.4	190.2	193.6	128.8	181.2	176.6	201.6	213.5	275.4	251.4	259.4	242.9	207.6	155.4	145.5	132.4	145.1	133.8	130.3	114.4	113.3	103.7	142	343.1	207.3	58.33	40.05	35.36	31.03	23.44	39.81
5004	80.75	88.69	89.42	274.5	280.6	170.7	224.1	183.8	184.5	161.2	159	193.1	198.9	230	264.8	240.8	215.6	200.1	157.8	133	126.6	135.3	138.2	124.8	123.1	114	107.5	111.3	279	281.3	80.91	41.28	36.65	30.56	26.04	26.44	257.8
6461	309.6	184	110.9	229.4	278.2	221.5	210.2	191.1	170.8	144.7	168.3	189.1	205.6	231.9	255.4	238.6	207.9	203.3	153.4	143	135	131.7	129.1	123.5	123.8	112.1	101.5	94.87	194.5	325.8	124.4	50.04	44.81	33.58	29.13	23	56.72
7787	1170	85.23	169.8	229.4	283.8	218.8	173.5	159.7	144.7	162.4	168.7	170.7	201.9	238.5	218.2	226	221.2	188.6	160.2	131.3	124.8	127.8	121.6	120.1	126.1	123.1	104.3	94.08	136.6	322.8	191.4	58.01	45.61	35.44	31.34	24.65	25.8	561
	2324	23.58	236	227.1	310.1	175.7	169.5	152.6	151.3	171.3	173	182.3	193	196.8	230.4	231.8	200.8	179.8	153.7	124.1	118.6	126.9	125.7	116.6	116.2	122.9	103	99.66	111	268.3	263.1	80.46	46.84	39.77	33.51	24.73	18.39	101.9
		125.3	186.4	232	249.4	211.5	149.2	141.7	166.4	149.5	156.9	165.6	184.9	199.4	209	198	192.7	178.4	147.8	133.9	118.6	134.6	125.8	135	121	119.7	107.1	100.4	98.36	201	300.9	115.8	50.17	39.71	33.98	24.97	20.5	31.65	1096
		84.52	179.1	118.3	246.5	214.3	141.5	145.9	174.7	130.7	153.2	164.1	193	192.7	210.5	221.2	200.8	167.4	141.2	117.5	113.4	127.1	125.6	127.7	116.1	116.9	108	101.4	94.08	142.5	302.7	164.6	57.53	43.32	37.8	26.47	20.85	20.03	211.8
		223.4	71.24	191.1	174.9	198.7	199	164.3	182.5	141	143.8	164.4	192.1	208.9	177.7	193.5	192.4	161.2	133.2	123.8	120.9	119.1	123.3	123.6	115.2	114.6	106.7	94.14	95.76	107.6	256.6	237.2	75.83	47.39	40.51	29.4	22.98	16.16	46.07
		1478	68.4	205.5	167.1	187.8	217.2	156.4	148.8	142.2	160.1	176.6	186.6	197.8	198.4	186.3	183.8	157.3	130.8	112.1	121.6	125	121.9	114.1	118.3	113.4	111.5	108.2	95.65	98.69	196.3	286.6	103.5	51.67	38.78	29.89	23.01	17.4	21.66	461.6
		2879	88.64	180.4	188.7	198.4	180.5	159.1	109.6	151.6	145.3	164.8	192.1	187.6	181.7	185.2	176.3	156	146.9	109.3	114.4	113.8	122.2	116.5	112.7	119.1	109.4	104.2	103.6	101.3	144.6	302.4	150.1	67.87	44.74	33.83	26.1	18.2	16.95	83.33
		4871	113.4	201.5	261.9	246	175.1	157.4	143.7	146.8	161	171.4	190	190.6	181.9	159.2	159.5	152.3	124.2	100.9	101.8	109.5	118.8	106.5	122	115.4	110.6	106.4	103.9	97.44	122.4	263.5	186.4	74.23	45.48	34.98	27.14	20.02	16.07	27.09	1040
			218.3	178.1	180.3	189.2	144.7	170.6	140.2	150	154.4	167.8	167.3	172.6	176.6	167.2	149.4	150.6	116.5	109.3	108.3	99.38	111.2	113.9	108.8	116.2	106.1	113.5	99.36	96.06	101.6	216.3	246	97.26	45.96	37.68	26.43	19.66	15.59	17.04	201.4
			613.3	232.2	202.7	166.9	172.7	151.4	156.8	150.3	171.8	182.4	188.7	180.9	163.5	158.2	154.2	151	118.7	111	102.7	106.5	107.8	113.3	108.3	119.3	103.5	113.3	102.5	102.3	102.5	159.2	265.1	136	57.62	38.82	27.69	20.9	17.88	14.2	42.29
			931.6	158	195.2	180	220.6	148.2	173.1	153.4	158.8	166.3	159.1	152.3	183.5	175.6	156.8	140.9	126.4	110.9	96.51	98.63	105.7	106.6	119.9	112.8	108.7	108.2	101.1	104.3	104.5	125	250.8	180.1	64.98	42.83	28.39	24.03	18.2	14.16	19.58	444.1
				145.4	194.3	171.9	118.2	155.7	162.3	143.6	183.5	160.7	150.9	170.8	173	159.9	149.2	146.7	114.3	101.3	98.64	99.28	89.69	102.6	111.5	108.9	100.5	107.4	110.2	103	105.4	103.8	206	226.5	77.78	45.18	32.76	25.76	18.75	14.27	14.23	83.25	3070
				140.6	229.7	215.3	166.9	146.5	136.1	149.9	148.4	163.5	190.4	180.6	163.3	173.5	142.8	139.2	114	97.41	87.51	96.74	95.96	99.69	114.8	110.9	107.2	114.4	106.4	104.4	102.8	92.9	154.6	245.2	102.3	48.06	32.25	26.51	18.97	15.61	12.9	23.25	891.7
				230	172.7	188.6	147.8	154.4	159.6	154	156.7	162.6	176.6	189.8	169.3	155.5	146.6	127.1	115.2	92.64	89.35	90.12	101.6	99.49	104.9	103.1	107.2	102.2	105.9	100.2	104.6	94.97	115.4	235.1	147.7	51.6	33.69	26.53	20.62	14.63	11.78	15.85	171.6
				564.8	206.9	110.6	160.3	152.3	154.9	139.6	155.7	154.4	170.4	169.5	166.9	146	146.6	128.9	103.1	87.82	91.42	88.18	91.73	97.32	94.63	98.66	110.3	104.3	110.3	101.5	97.09	103	105.4	212.3	183.9	64.89	35.46	25.76	21.7	15.51	10.94	11.65	36.01
				1628	187.7	182.9	133.5	135	172.7	143.5	153.3	165.2	169.3	167.2	175.4	141.8	136.5	126.1	96.46	92.48	86.98	80.64	100.6	104.9	89.58	98.16	112.1	107.9	104.8	107.9	102.1	100.3	93.9	162.5	219.2	86.01	35.26	27.61	17.79	18	15.19	12.46	14.67	373.3
					118.5	183.3	167	145.1	127.7	185.7	146.6	154.8	150.5	173.2	168.5	154.5	130.5	130	100.7	96.36	90.07	84.52	92.6	90.53	94.44	98.99	105.9	103.5	107.3	106	100.5	101.3	100	119.3	209.1	115.8	42.97	29.2	21.65	18.15	13.4	10.56	10.61	67.28
					199	167.5	157.5	158.7	165.3	144.1	138.8	144.8	158.4	177.2	153.7	148	127.6	133.2	98.78	91.08	90.69	81.54	88.96	92.17	101.4	99.9	101.6	105.5	104.2	94.23	99.47	98.61	95.94	97.45	183.6	147.9	52.76	28.76	23.6	18.02	12.32	10.95	9.748	19.91	784.4
					228.5	132.6	125.4	139.2	151.7	146.5	139.9	157.6	163.6	159.2	179.3	143.9	120.5	113	105.9	86.01	80.43	86.64	82.79	95.5	91.3	91.89	101.5	93.35	106.7	108.3	103.3	102.5	92.76	88.12	150.3	173.3	63.37	34.1	24.93	18.94	12.54	12.5	8.495	12.69	153.9
					704.9	197.1	160.7	142.9	169.2	149	156.6	154.8	168.3	167.8	169.8	140.9	129.9	104.2	98.12	74.68	81.07	78.83	82.75	82.71	90.78	90.4	99.48	100.6	92.8	96.86	99.39	99.65	92.79	87.57	115.2	185.6	89.53	36.62	26.3	18.66	12.98	10.51	9.707	7.343	30.48
						155.6	148.6	138.7	120	134.9	152.1	155.1	163.6	184.5	167.6	159	123.5	114	85.01	78.46	75.61	75.02	75.98	88.55	90.98	83.24	94.8	101.8	103.1	97.99	95.93	91.48	91.6	80.16	86.81	168.1	118.7	41.77	27.81	20.91	16.13	12.13	6.871	7.287	12.53	351.1
						130.7	115.8	130.2	145	126.3	157.5	169.2	157.2	165.8	153.3	148.9	122.9	104.1	80.41	75.29	70.7	72.66	75.02	75.2	81.04	82.32	93.72	89.79	93.5	96.04	97.12	97.1	87.58	82.77	75.79	130.7	139.3	56.47	26.34	20.94	13.76	11.38	6.739	7.907	8.483	63.44
						190.6	161.1	126.2	176.1	145.3	154.4	157.2	180.7	209	173.2	152	118.6	105	77.73	73.67	79.92	70.29	75.91	83.96	82.94	89	86.79	95.92	95.57	90.72	96.65	94.66	86.35	79.91	68.86	97.11	145.8	71.11	25.21	19.53	15.54	11.15	8.266	6.809	5.578	16.52	748
						323.1	131.6	141.6	136.4	164.8	167.8	145.3	193.3	191.4	158.1	149.1	113.1	98.19	91.7	73.34	75.99	70.79	71.68	70.76	76.46	81.68	84.48	93.52	96.67	90.76	90.86	91.29	84.5	81.58	67.21	78.56	147.7	91.12	30.57	19.76	15.51	11.8	9.749	6.501	7.278	8.482	143
						954.9	152.8	178.6	144.3	155.9	143.8	153.5	168.8	238.4	174	159.1	116.8	92.56	88.96	67.55	72.78	66.78	65.19	74.53	69.11	78.43	85.9	87.33	88.25	88.93	88.02	87.64	82.3	78.83	67.15	69.17	124.9	112.5	36.78	21.06	15.03	10.96	9.35	6.977	5.807	6.346	29.69	1347
							173.5	132.2	128.9	144.1	134.3	163.5	175.9	215.2	185.6	148.6	122.9	89.75	91.46	73.04	63.59	66.06	66.55	65.67	76.12	77.97	81.84	85.65	85.03	90.32	92.06	90.91	78.96	71.27	66.36	61.65	95.24	124	49.46	21.81	13.65	11.95	10.18	7.001	7.082	6.982	11.41	311.1
							151.1	122.8	115.4	118.2	158.5	145.4	183	199	188.5	141.4	117.3	98.77	87.02	68.84	57.75	66.58	63.21	63.85	69.8	66.69	70.1	80.68	76.62	85.51	95.6	86.64	79.6	72.44	60.31	57.01	73.23	123.1	71.23	24.65	16.23	13.42	7.79	7.647	6.436	4.901	7.106	57.43
							174.5	141.3	144.8	117.4	141.4	147.4	194.3	192.2	198	139.1	112.5	104.3	80.86	70.68	60.47	62.74	57.36	64.73	66.81	72.29	74.06	79.15	83.78	77.85	86.1	86.79	77.66	77.91	68.62	55.01	53.74	108.6	82.49	26.45	19.41	12.99	9.125	6.624	6.244	4.738	5.959	13.99	697.4
								118.2	137.5	136.6	143	136.8	181.2	201.2	170.3	138.4	117.9	96.11	73.5	67.9	58.94	59.8	58.42	66.02	64.57	62.88	72.03	75.82	77.09	74.81	79.27	81.13	73.81	66.54	60.81	51.91	48.4	83.96	105.4	39.54	15.59	10.9	9.137	7.124	6.699	4.99	5.835	8.248	137.9
								129.2	123.8	124.6	135.5	139.2	193.7	180.1	168.2	128.7	106.8	84.31	76.06	60.3	61.07	57.5	55.19	55.88	58.01	59.6	68.44	74.91	73.53	75.76	77.75	76.21	75.17	72.4	62.3	52.91	43.86	63.03	104.6	54.08	18.49	13.37	9.721	6.943	6.533	4.721	4.857	6.75	26.39
								125.6	121.2	129.6	127.9	157.6	182.2	192	166	120.4	107.4	86.38	65.79	59.73	60.88	52.96	55.96	62.14	54.43	62.72	62.25	66.18	71.9	77.1	73.33	72.59	77.42	70.56	62.06	50.07	43.48	44.55	98.7	66.72	23.36	13.17	9.637	7.463	5.285	4.104	5.03	4.492	9.704
								140.5	132.9	126.3	138.1	147.6	176.8	180.8	159.7	113.8	101	80.15	66.45	66.77	49.33	49.15	49.29	50.47	53.5	56.26	65.79	66.13	68.14	69.29	72.55	72.71	69	66.1	55.87	46.58	37.15	37.01	74.58	80.02	26.69	14.19	8.226	6.805	4.799	5.312	5.271	4.247	6.408
								137.3	117.5	116.7	112.5	127	157	189.1	151.2	120.4	100.4	90.01	68.25	57.65	48.52	47.03	51.25	43.63	53.62	60.09	61.05	67.45	63.47	66.06	72.33	67.51	64.21	63.33	52.53	45.34	37.26	33.79	56.37	88.76	37.4	10.22	8.188	5.992	4.795	4.018	4.32	4.072	4.818
								265	106.2	123	115.1	124.7	162	159.4	138.7	116.6	99.72	76.08	69	53.64	48.41	46.07	43.82	44.47	48.6	58.03	57.05	62.69	61.51	66.48	69.58	68.51	64.24	58.03	55.3	41.38	34.92	32.76	40.49	78.9	52.08	14.41	8.41	7.86	5.211	4.473	4.482	4.478	4.542
								1188	116.2	125	112.5	109.9	136	160.4	132	114.4	97.78	77.1	62.73	51.56	47.44	48.72	42.62	47.06	47.44	47.4	53.5	51.8	62.22	64.78	65.97	69.31	61.13	61.41	55.7	46.7	33.88	31.15	29.36	63.06	60.31	19.07	10.32	9.359	5.076	4.058	3.565	3.978	4.758
									108.7	111.2	112.6	115.9	141	150	118.4	105.5	89.76	70.83	59.89	44.73	42.83	44.15	40.1	44.77	46.81	46.84	46.99	51.3	55.21	58.91	59.82	61.67	60.11	53.29	51.67	47.46	32.11	31.07	25.51	50.89	68.82	26.85	11.38	7.157	5.393	3.54	5.06	3.913	3.547
									106.1	121.4	102.7	120.8	143.3	152.6	120.7	104.3	84.89	71.32	60.14	43.38	48.15	37.87	43.82	39.29	44.22	49.28	47.66	47.11	56.92	55.46	54.4	61.9	56.42	56.46	47.18	39.27	34.44	31.22	26.66	38.87	71.74	36.68	11.86	8.218	5.39	4.699	3.604	4.468	3.089
									113.5	125.3	122.7	123.2	134.8	147	116.9	101.3	77.94	69.37	56.65	39.8	35.39	38.8	42.48	44.95	41.99	42.61	43.35	46.1	51.04	49.34	54.18	60.41	50.11	50.72	47.71	40.52	34.01	28.66	21.64	28.48	62.03	45.9	16.42	6.445	5.164	4.118	3.927	3.944	4.662
									292.2	118.1	104.9	120.8	130.9	138.5	111.7	90.79	69.91	62.36	41.5	39.45	37.33	38.86	38.3	43.1	41.42	41.86	43.57	45.27	48.15	47.99	50.62	54.19	51.48	53.09	41.09	38.98	32.43	29.58	21.57	21.82	46.73	55.46	20.04	7.094	5.168	4.405	3.872	2.908	3.044
									1134	107.1	115.6	106.4	130	136.8	108.1	98.34	75.09	58.03	47.84	43.4	38.81	39.87	36.69	37.4	38.47	40.45	41.56	50.92	47.16	46.4	48.62	49.29	48.16	48.01	41.91	33.4	30.12	24.38	21.28	19.16	33.9	62.95	29.6	10.26	5.44	4.854	4.49	2.994	3.674
									3674	95.85	115.9	101.4	110.4	129.4	106.5	83.19	73.45	58.61	43.95	36.97	34.71	37.01	37.09	37.88	36.81	41.38	42.26	42.84	46.93	45.15	49.22	49.18	49.47	42.98	42.87	31.4	30.06	25.41	20.63	21.46	26.14	53.35	38.24	10.33	4.722	5.854	2.581	3.946	3.693
										103.6	105.1	102.8	131.7	117.2	104.4	89.34	69.22	54.75	40.51	37.61	31.26	35.63	35.72	34.38	38.46	38.16	37.69	37.38	43.67	44.97	44.68	48.51	49.26	42.68	38.1	34.49	28.04	24.98	20.34	17.66	17.31	40.98	49.56	15.31	5.433	4.239	3.286	3.356	3.664
										123.4	104.8	103.1	124	122.1	100.5	88.91	68.19	58.4	43.1	34.77	29.54	30.72	32.62	31.79	33.24	34.71	36.97	40.52	41.82	38.36	45.61	42.71	45.86	36.85	39.79	33.93	26.84	24.73	19.5	18	13.86	30.9	50.23	22.38	6.592	3.776	3.399	4.087	4.176
										220.2	105.3	100.9	102.6	126.1	89.03	90.65	64.89	48.3	38.46	42.29	31.36	25.47	28.47	34.34	32.41	32.41	36.36	37.54	39.25	37.16	41.49	40.69	42.85	38.05	34.52	29.55	27.78	22.89	18.93	17.88	13.66	23.29	50.01	26.97	7.679	4.284	4.788	3.109	3.63
										1070	106.9	102.1	117.8	100.8	112	79.96	63.98	51.33	38.54	36.43	30.69	32.85	29.74	27.03	32.65	33.39	32.31	31.27	35.35	36.27	40.37	38.21	39.83	34.8	32.74	30.27	23.55	22.08	19.57	15.09	14.45	16.59	40.42	36.15	11.26	4.52	4.195	3.914	3.096
											97.48	110.1	98.09	105.5	104.1	76.51	65.56	42.97	36.84	29.3	25.82	26.77	27.31	25.94	29.35	28.12	31.49	33.15	36.23	34.86	32.95	35.67	36.7	32.6	31.03	27.29	26.88	21.81	18.46	15.41	12.98	11.43	30.29	44.09	17.71	5.363	4.631	2.941	3.207
											91.39	92.77	91.42	118.2	93.23	69.61	56.9	45.76	39.59	29.51	24.22	24.1	26.73	26.92	27.82	26.22	30.22	29.59	33.22	34.99	33.92	37.11	31.8	32.5	29.73	26.34	23.5	22.56	17.45	14.41	12.2	11.58	22.13	45.06	22.93	6.41	3.892	3.385	3.562
											101.3	78.1	105.1	104.1	89.16	71.2	52.28	43.45	33.02	25.86	25.89	22.84	25.64	23.59	23.77	25.53	30.19	30.76	29.04	33.64	33.63	33.78	37.97	32.16	27.47	26.88	22.06	21.41	16.03	13.79	11.56	13.31	15.02	40.09	28.65	8.795	4.326	3.377	2.833
											173.8	69.07	90.34	93.47	76.29	70.79	55.12	40.53	33.27	23.61	31.88	22.64	22.74	24.07	23.73	25.51	29.18	32.02	27.7	27.91	33.78	31.56	31.26	31.26	30.02	25.85	23.73	20.93	15.16	14.95	11.79	12.95	11.23	31.27	35.47	11.2	4.134	2.947	3.141
												96.65	89.29	98.99	74.18	68.86	62.54	36.75	33.55	27.32	24.63	20.61	21.39	22.96	23.69	27.22	27.09	26.8	30.63	29.55	30.14	28.79	27.31	28.4	26.26	24.54	20.27	20.45	14.64	13.67	10.17	11.64	8.924	23.86	33.91	15.15	5.231	3.968	3.868
												91.21	87.35	88.19	69.47	72.43	63.6	44.45	30.23	26.64	26.87	19.94	20.05	24.48	19.62	25.31	21.62	26.4	26.72	25.87	28.49	30.82	28.54	26.86	25.01	24.15	19.39	20.93	15.12	12.84	9.182	10.51	8.472	15.04	33.04	21.64	5.998	3.217	2.451
												80.96	87.42	83.89	69.3	56.77	44.89	47.1	30.26	23.14	23.27	19.23	19.92	23.59	22.45	23.1	25.26	24.37	25.28	26.14	24.44	26.71	25.48	27.54	24.97	24.03	19.31	14.95	14.13	12.51	10.13	9.241	7.02	10.66	27.52	26.55	9.163	3.464	3.287
												89.72	76.33	81.33	71.32	56.66	47.25	41.76	28.63	22.38	16.34	22.42	18.89	19.55	19.18	20.94	23.58	23.29	23.92	24.26	28.66	25	26.58	24.52	27.93	19.49	17.99	14.78	13.95	12.42	11.26	8.923	8.331	7.36	21.22	30.19	13.29	4.621	3.109
												156.7	78.54	84.66	72.78	59.11	49.41	37.25	25.22	22.6	19.91	18.99	20.42	19.12	19.77	23.07	19.94	20.9	22.67	21.99	23.59	28.4	26.12	23.34	23.95	17.97	17.44	15.11	12.02	11.98	9.302	10.29	8.825	6.775	16.37	32.03	18.6	6.191	3.568
												694.6	73.87	77.73	74.5	66.17	40.97	37.74	27.56	24.79	18.18	18.89	16.25	18.29	22.2	20.73	20.14	19.05	21.12	21.25	23.52	23.91	25.11	25.75	20.01	17.35	17.2	15.05	13.85	9.889	9.902	9.077	8.099	6.85	11.8	28.02	25.42	8.361	4.349
													85.34	61.65	64.64	59.66	43.79	26.38	26.19	19.8	14.2	17.4	17.98	18.23	19.17	18.89	20.44	19.28	20.4	22.13	22.41	23.1	26.62	21.89	20.41	17.83	13.32	15.67	12.42	12.71	9.343	10.2	7.828	7.466	7.583	22.19	28.31	9.202	4.365
													75.11	71.26	68.73	55.95	48.41	35.38	21.09	20.02	16.74	17.81	18.01	17.22	15.74	15.65	17.81	17.04	19.96	17.02	19.86	19.9	21.73	23.05	19.91	14.96	15.93	13.52	12	8.847	8.884	8.946	7.778	7.052	6.519	15.3	27.44	15.02	3.655
													68.57	82.06	61.45	46.27	45.17	25.66	20.21	19.27	15.42	16.34	13.72	20.55	13.54	16.89	17.67	18.38	19.9	19.31	20.09	19.81	20.56	19.15	17.47	17.35	14.2	13.19	13.1	10.23	8.652	8.057	6.675	6.155	4.383	13.39	24.03	18.32	5.432
														67.68	61.55	40.5	43.84	23.6	21.18	19.69	13.89	14.73	17.94	13.17	15.48	17.53	17.37	15.33	20.7	19.92	19.31	20.22	20.73	18.11	18.43	16.99	12.26	12.25	10.26	9.337	7.895	6.675	7.486	5.959	5.574	9.877	22.28	25.35	7.954
														60.71	46.26	43.63	39.85	29.74	23.33	16.85	16.11	14.7	14.95	11.96	13.39	14.38	16.76	16.11	20.44	19.3	16.83	17.92	17.35	14.07	18.03	13.5	17.17	11.97	9.073	9.184	9.29	8.259	6.69	6.422	4.644	5.699	16.54	24.25	11.69
														58.29	56.99	46.64	32.53	27.79	17.78	12.66	15.43	14.53	16.7	14.46	13.13	13.95	14.29	14.57	16.26	16.64	17.9	18.12	17.12	16.25	16.2	14.54	13.51	12.43	8.565	8.847	6.761	6.594	4.989	6.525	3.838	5.79	11.96	23	15.41
														63.95	59	42.43	33.55	25.43	18.71	13.2	11.14	12.29	14.1	13.39	16.36	12.57	15.05	14.04	14.88	15.54	13.8	16.12	16.56	15.88	16.03	15.35	12.14	9.871	10.69	7.891	7.739	7.788	5.313	4.869	3.91	4.759	8.166	20.99	20.01
														73.84	59.04	45.84	26.28	28.01	16.74	12.77	11.32	9.416	9.5	11.53	13.61	13.13	16.33	16.38	13.22	15.15	15.94	16.34	15.27	15.53	13.81	13.38	9.463	10.09	9.55	8.807	7.46	7.007	5.212	5.332	4.823	5.142	5.663	16.29	20.98
														116.9	48.97	39.84	27.86	19.99	18.73	14.37	11.15	13.44	9.866	9.718	13.93	12.79	11.35	15.9	12.67	15.15	16.03	15.98	14.22	15.16	12.52	11.95	9.986	9.056	8.728	7.834	7.466	5.774	5.62	4.873	5.863	5.235	3.61	11.47	22.44
														460.5	51.06	41.72	29.6	24.7	12.63	16.84	13.5	13.51	10.98	11.43	12.22	14	12.43	13.23	13.05	12.49	12.43	11.84	13.7	13.88	12.93	11.06	9.549	8.342	8.449	7.766	7.248	7.611	7.518	4.616	4.156	2.588	3.796	8.42	20.64
														1523	45	31.26	26.65	22.58	16.51	12.48	11.92	11.73	9.015	11.58	12.98	11.62	12.97	12.27	13.18	12.78	12.83	14.94	15.7	13	11.63	10.69	10.96	8.265	5.943	7.805	7.026	6.164	4.964	4.303	4.271	4.002	4.694	5.301	17.81
															51.32	36.28	23.53	17.09	15.06	11.88	7.928	11.06	8.101	10.29	11.63	10.32	12.04	12.98	14.01	13.46	11.51	13.71	12.43	11.75	10.45	9.153	9.77	9.42	6.858	7.91	5.324	6.171	5.747	4.971	4.705	4.432	4.913	4.393	13.74
															53.66	31.56	23.56	19.26	14.55	9.23	8.931	13.02	8.131	6.412	7.909	10.89	10.58	10.95	10.36	11.24	12.42	12.28	10.53	11.05	10.53	8.809	9.2	8.171	6.749	6.467	5.776	6.249	5.473	4.583	3.112	3.252	4.529	3.058	9.457
															80.42	29.59	24.27	21.86	13.18	10.29	9.208	10.88	7.175	6.86	13.1	9.83	7.78	10.7	11.06	11.23	12.42	11.37	11.53	11.78	8.897	9.753	7.546	8.025	6.062	6.043	5.934	5.458	4.244	4.403	3.017	3.673	3.988	2.958	6.776
															385.2	33.07	25.16	21.08	13.16	10.94	11.08	12.23	7.381	7.303	7.651	10.21	7.86	8.488	11.21	8.521	11.71	8.741	10.13	10.99	8.083	11.1	9.067	6.902	5.942	4.92	5.069	5.47	4.337	4.263	3.559	4.554	3.344	3.108	3.633
																31.52	23.07	16.96	12.04	10.92	9.309	8.799	7.619	9.378	8.948	9.582	8.715	7.497	10.54	9.721	10.76	8.055	11.38	10.9	9.684	7.001	5.905	6.375	5.649	4.743	5.309	4.489	3.734	4.351	2.98	3.971	3.169	2.098	3.208
																38.44	21.12	14.97	11.74	7.522	9.06	6.889	8.369	9.266	6.943	8.1	8.682	8.059	9.238	9.766	11.12	9.666	9.364	8.795	9.053	5.399	8.677	5.993	6.312	5.476	4.606	4.283	4.723	4.043	3.029	4.07	2.344	3.121	2.364
																33.91	18.86	17.94	14.7	9.158	7.482	8.121	8.266	6.671	7.628	6.891	7.947	7.636	9.897	10.63	9.12	8.527	8.431	10.34	8.996	7.35	6.838	5.498	5.713	6.931	4.508	3.216	3.218	4.423	4.129	3.155	4.016	2.488	2.133
																75.5	17.54	13.7	12.48	7.709	6.693	5.626	10.62	8.378	6.946	7.536	7.78	9.257	9.008	8.629	9.243	8.546	8.398	7.719	8.446	7.337	7.294	6.044	5.188	5.743	4.903	4.131	4.17	3.615	4.064	3.182	2.168	3.397	3.027
																268.7	18.49	15.11	12.03	7.279	5.432	6.79	9.035	7.453	5.449	8.577	8.771	9.623	6.545	10.05	7.793	9.212	8.743	8.472	7.878	6.705	5.122	6.002	3.52	4.993	3.847	3.371	4.053	3.577	2.8	2.851	1.82	2.527	2.483
																796.6	23.17	18.49	9.282	10.45	8.754	7.58	7.987	7.014	7.495	5.767	5.517	6.089	6.252	9.542	5.422	8.447	8.959	7.705	7.12	5.29	4.192	4.254	4.561	3.838	3.559	3.884	3.666	3.17	2.131	2.847	1.998	2.459	2.481
																1950	21.8	16.8	9.675	11.95	6.629	7.486	5.926	7.247	6.341	6.212	8.239	6.725	7.264	8.159	6.123	6.865	7.876	7.114	4.971	5.696	4.463	5.053	4.18	3.767	3.156	3.466	3.393	2.899	2.91	2.602	2.097	2.48	2.421
																	26.44	13.68	9.719	9.567	7.49	6.414	4.879	6.827	6.434	5.97	5.918	5.522	8.363	7.21	7.682	6.741	6.958	6.351	6.727	5.369	4.695	3.642	4.66	4.242	3.882	3.287	2.859	3.532	2.833	2.082	2.225	2.521	1.69
																	45.8	19.16	8.972	9.004	5.027	4.691	6.352	7.465	4.504	5.532	7.316	6.274	5.924	7.008	5.759	6.243	6.36	5.605	5.381	4.973	4.073	3.304	3.781	2.975	3.502	3.693	2.953	3.011	3.269	2.328	1.737	1.451	2.236
																	174.7	12.12	9.112	8.909	7.012	4.782	5.497	7.026	6.053	5.873	7.762	5.86	5.569	6.753	6.549	5.865	6.056	6.052	5.927	5.175	4.739	4.063	3.501	4.01	2.388	2.472	2.699	2.517	2.979	2.924	2.083	1.813	1.9
																	540.7	17.85	12.05	8.07	5.358	5.156	5.591	4.348	5.877	6.113	7.207	5.452	4.846	5.798	5.499	5.589	5.051	7.351	4.716	4.261	3.822	3.778	3.519	4.687	2.041	2.681	2.142	1.641	2.801	2.234	1.458	2.026	1.61
																		19.95	11.16	5.756	7.483	6.89	4.958	4.898	5.449	6.877	4.334	4.775	5.098	5.572	5.19	5.722	5.437	5.388	5.989	5.896	4.319	3.704	4.018	3.636	2.261	3.084	2.28	2.407	2.048	1.088	2.549	2.083	1.211
																		18.85	9.642	9.3	6.451	5.205	4.031	4.331	5.582	4.101	5.014	4.66	5.326	5.064	5.724	5.46	5.593	3.876	5.123	4.384	3.33	2.47	3.46	3.55	2.239	1.897	2.026	2.649	2.269	2.293	2.14	1.677	1.304
																		49.38	8.201	8.26	6.217	6.134	4.13	4.853	5.873	5.733	6.503	3.733	5.382	4.838	4.643	5.535	4.335	5.779	3.693	4.23	3.675	3.22	2.646	2.923	3.021	2.763	3.029	1.899	2.191	1.892	2.544	1.616	1.2
																		135.1	7.705	6.112	6.362	6.148	3.097	7.759	4.755	3.94	5.587	4.101	5.665	3.825	4.552	3.611	5.465	4.334	4.694	3.927	3.368	3.611	3.249	1.574	2.564	1.627	1.96	2.334	2.013	1.135	1.839	1.393	1.174
																		404.9	9.716	8.772	6.725	4.92	5.906	5.525	4.761	3.457	4.235	4.73	3.932	6.416	2.765	4.57	3.949	4.385	2.849	4.226	3.221	2.832	2.1	1.657	1.687	2.125	2.654	1.601	1.584	2.141	2.109	1.456	2.09
																			8.986	9.287	7.37	5.779	4.381	4.262	4.45	3.814	4.828	4.009	5.425	5.894	4.607	6.036	4.173	3.004	3.963	4.505	3.268	2.753	2.482	2.679	3.266	2.68	2.288	1.602	1.255	1.969	1.284	1.529	1.774
																			10.22	6.393	4.198	4.995	4.154	3.776	3.568	4.856	4.019	4.397	4.126	3.431	4.19	5.001	4.115	4.66	3.672	3.801	3.488	3.052	1.869	2.449	2.172	2.4	1.94	2.198	2.161	1.823	1.096	2.004	1.308
																			28.8	6.821	5.814	3.538	4.668	4.151	4.424	3.121	3.126	4.169	3.92	3.083	2.211	3.179	4.713	3.835	2.574	3.361	3.816	2.792	2.156	2.264	1.789	2.441	1.985	1.689	1.603	1.185	0.885	1.851	1.257
																			98.26	7.434	6.293	5.895	4.226	4.532	2.309	2.692	4.993	4.384	2.661	4.443	4.694	3.228	3.817	2.726	3.013	3.463	2.423	2.225	2.201	2.562	2.195	1.731	2.099	1.932	1.197	0.764	0.845	1.607	1.781
																			309.4	6.187	5.149	5.523	3.794	4.303	2.225	3.602	2.901	3.689	2.85	3.237	3.792	3.492	3.152	3.932	3.145	3.88	2.274	2.612	2.571	1.506	1.847	1.661	1.478	1.575	1.389	1.002	1.445	1.098	1.084
																			727.1	6.179	3.983	6.249	5.582	3.771	3.894	3.154	4.251	3.706	3.188	4.251	3.789	3.517	2.829	3.761	2.931	2.899	3.08	3.313	1.023	2.439	1.48	1.959	1.202	1.353	1.39	1.232	1.624	1.137	1.018
																				13.56	7.024	2.997	4.008	2.599	4.087	2.585	2.361	3.043	2.162	2.163	3.029	3.181	2.824	2.947	2.748	2.968	2.802	3.386	1.252	2.043	1.58	1.363	1.47	1.097	1.078	1.376	1.669	1.454	0.843
																				24.93	5.663	4.972	4.022	3.561	3.898	3.195	3.002	4.409	2.616	3.377	3.669	3.461	2.615	2.692	2.081	2.842	2.699	2.363	2.055	1.959	1.35	1.66	0.83	1.299	1.262	1.639	1.507	0.843	1.081
																				79.93	6.925	4.585	3.695	3.606	5.719	3.885	3.396	2.55	2.433	3.319	3.032	2.288	2.905	2.239	2.443	2.631	2.917	1.977	2.433	2.526	0.828	2.147	0.918	1.233	1.022	0.97	1.597	0.833	0.914
																				233	6.347	5.269	3.622	2.821	3.319	3.388	3.996	3.392	1.717	2.968	2.283	2.75	2.843	2.976	2.646	1.789	2.044	2.797	2.175	1.686	1.549	1.474	1.369	1.21	1.927	1.412	1.181	0.742	1.11
																				583.4	6.955	6.155	3.023	3.908	3.637	3.107	3.044	2.639	2.358	2.281	2.636	2.083	2.83	2.64	2.407	2.567	1.497	1.848	1.533	1.52	1.911	1.336	1.529	1.188	2.015	0.743	1.083	1.224	1.528
																					7.431	5.512	3.391	3.214	2.466	2.864	2.674	3.138	2.91	2.665	2.309	2.39	4.223	2.217	2.601	2.268	1.227	1.774	1.862	2.179	1.726	1.569	1.787	0.83	1.304	0.922	0.96	1.378	0.465
																					17.61	5.248	2.591	3.749	2.498	2.91	1.967	1.412	2.854	2.564	3.282	2.491	3.362	1.4	2	1.541	1.707	1.852	1.764	1.91	1.723	1.009	1.045	1.555	0.931	0.529	0.69	0.757	0.957
																					59.59	6.073	2.855	4.643	2.267	3.658	2.815	2.752	2.668	1.744	2.571	2.486	1.631	1.371	1.483	1.558	1.419	1.929	1.279	1.593	1.32	0.584	1.01	0.886	0.812	1.279	0.61	1.287	0.823
																					186.3	5.79	3.44	3.375	2.989	1.959	2.342	1.944	2.058	2.643	3.319	1.714	2.595	2.904	1.436	1.473	1.975	1.364	1.762	1.847	1.409	0.969	1.375	0.892	1.209	0.898	1.114	1.179	0.954
[truncated: 1 more columns]
